# Supplementary material for: The PH Domain and C-Terminal polyD Motif of Phafin2 Exhibit a Unique Concurrence in Animals
Source: MDPI journal article supplement (doi:10.3390/membranes12070696), 2022-07-07
Supplement: s1 [file s1]

**Supplementary File S4:** Multiple sequence alignment of Phafin2 and Phafin2-like proteins from bacteria, archaea, fungi, plants, nonhuman mammals, and humans.

**Bacteria**

|                                |                                                |      |
|--------------------------------|------------------------------------------------|------|
| sp Q9H8W4 PKHF2_HUMAN          | ----ARSDSYSQSLKSPLNDMSDDDDDDSSD-----           | 249  |
| tr A0A1Y6CWR2 A0A1Y6CWR2_9GAMM | LDP-AKAQLAQGLRNPVLGGGHPQIQAKPS-----            | 1181 |
| tr A0A4Q5XUS2 A0A4Q5XUS2_9DELT | -----                                          | 383  |
| tr A0A0A8E4G1 A0A0A8E4G1_9GAMM | -----VKN-----IYKGFC-----                       | 114  |
| tr A0A2E9XWQ4 A0A2E9XWQ4_9RICK | VSF-APKPSTMQPR SARVE-TSSFDQDLKRA---LEMSLE----- | 271  |
| tr A0A0G2ZPZ8 A0A0G2ZPZ8_9DELT | -----                                          | 347  |
| tr A0A5C6VDZ7 A0A5C6VDZ7_9BURK | -----                                          | 269  |
| tr A0A2E9LIA3 A0A2E9LIA3_9CHLR | -----                                          | 90   |
| tr A0A2E4CAT1 A0A2E4CAT1_9ACTN | TEP-LL-----VMGDGGWADIR DWRVLCCLNRGWK-----      | 267  |
| tr A0A4Q6X9R2 A0A4Q6X9R2_9BURK | -----                                          | 334  |
| tr A0A158KI31 A0A158KI31_9BURK | -----                                          | 332  |
| tr A0A2W4SQ66 A0A2W4SQ66_9GAMM | -----                                          | 329  |
| tr A0A5J6QPA5 A0A5J6QPA5_9PSED | -----                                          | 309  |
| tr A0A561P8H2 A0A561P8H2_XANCT | -----                                          | 290  |
| tr A0A2E8LZD9 A0A2E8LZD9_9BACT | IRI-LS-----LVG----LDPQDMCRLACL SRSWK-----      | 111  |
| tr A0A4R7ALI0 A0A4R7ALI0_9GAMM | -----                                          | 321  |
| tr A0A3L7RST6 A0A3L7RST6_9BACT | -----QITLALCLSARTA-----                        | 340  |
| tr A0A2E0WHK0 A0A2E0WHK0_9CHLR | LMF-LP-----LP ISELEVFLYVNKKWN-----             | 112  |
| tr A0A1Z9KZ67 A0A1Z9KZ67_9SYNE | LRP-APADAQIGTLSSPLA-GGHHPRHG-----              | 131  |
| tr A0A2E9LIE3 A0A2E9LIE3_9CHLR | LRF-----IPVKCWTSCFLVSRQFS-----                 | 301  |
| tr A0A3S3EH81 A0A3S3EH81_9PSED | -----                                          | 313  |
| tr A0A0F4XPH7 A0A0F4XPH7_9PSED | -----                                          | 411  |
| tr A0A657PDX6 A0A657PDX6_9PSED | -----                                          | 411  |
| tr G8Q597 G8Q597_PSEF3         | -----                                          | 411  |
| tr A0A2E0E560 A0A2E0E560_9RHOB | FAN-LP-----IVIVDFYNLRLVCKKWC-----              | 149  |
| tr A0A0C2EFB1 A0A0C2EFB1_9PSED | -----                                          | 412  |
| tr A0A2E6VXV8 A0A2E6VXV8_9PROT | -----K-----NNFIF-----                          | 128  |
| tr A0A2D7RET3 A0A2D7RET3_9GAMM | LCL-LP-----LTIMEKHVFLYVNKSWN-----              | 107  |
| tr A0A4R7L8D8 A0A4R7L8D8_9GAMM | -----                                          | 310  |
| tr A0A4R3YS80 A0A4R3YS80_9GAMM | -----                                          | 288  |
| tr A0A4Q3E3P0 A0A4Q3E3P0_9RICK | IRQ-LF-----ENL----VPYDEMTA---HN---L-----       | 127  |
| tr A0A0Q9PCH9 A0A0Q9PCH9_9GAMM | -----                                          | 262  |
| tr A0A2D5QHX0 A0A2D5QHX0_9GAMM | SMG-YPSDLVNEQIERGAGYKGSTPDEKVKA---VVEWF-----   | 223  |
| tr A0A239KKI8 A0A239KKI8_9PSED | -----                                          | 1020 |
| tr A0A2E8CGN4 A0A2E8CGN4_9DELT | IRD-LK-----QRRSEIEGELQKN-----                  | 590  |
| tr A0A6I1NH92 A0A6I1NH92_9PSED | -----                                          | 1019 |
| tr A0A1E3GCQ5 A0A1E3GCQ5_9GAMM | -----                                          | 312  |

|                                |                                                            |     |
|--------------------------------|------------------------------------------------------------|-----|
| tr A0A2A8BFD9 A0A2A8BFD9_9BACI | --M-DPADFVAMQLSGV-----                                     | 88  |
| tr A0A484ZT69 A0A484ZT69_9GAMM | -----                                                      | 146 |
| tr A0A2M7G853 A0A2M7G853_9BACT | NRIPiARDAVRT-----G---RRRIEWREDQPASLFWVEAQDQGDPSHPSQIRDRLFD | 371 |
| tr A0A2C5DIR4 A0A2C5DIR4_9BACI | --M-DPADFVAMQLSGV-----                                     | 88  |

## Archaea

|                                |                                                          |     |
|--------------------------------|----------------------------------------------------------|-----|
| sp Q9H8W4 PKHF2_HUMAN          | --DDDSSD-----                                            | 249 |
| tr A0A482RXE8 A0A482RXE8_9ARCH | -----                                                    | 468 |
| tr A0A482S4E7 A0A482S4E7_9ARCH | -VKDVSQELW---PYFPiALLLC-----T-----QD-L                   | 149 |
| tr A0A482RTS6 A0A482RTS6_9ARCH | ----LGLDPA---PWALRRLATL-----P-----Y---                   | 193 |
| tr A0A482UR88 A0A482UR88_9ARCH | -----                                                    | 110 |
| tr A0A482R0G1 A0A482R0G1_9EURY | -----                                                    | 93  |
| tr A0A482RYJ3 A0A482RYJ3_9ARCH | -----                                                    | 158 |
| tr A0A482SL25 A0A482SL25_9ARCH | ---GGFGAFW---ACI-----IPNIAPQ--                           | 280 |
| tr A0A482SVI4 A0A482SVI4_9ARCH | -----SLGSAATTGSRSPVAGSiAA-----TTG-----                   | 127 |
| tr A0A482ST03 A0A482ST03_9ARCH | -----                                                    | 153 |
| tr A0A482R4B7 A0A482R4B7_9EURY | --GAGGSEAW---PGTLGNVTDV-----P-----LA-P                   | 290 |
| tr A0A482SVF7 A0A482SVF7_9ARCH | SEITSNHDEW---KQSiFNLVRE-----V-----VSSVDPDVK              | 202 |
| tr A0A482SZF2 A0A482SZF2_9ARCH | -----                                                    | 465 |
| tr A0A482RGE2 A0A482RGE2_9ARCH | -----                                                    | 596 |
| tr A0A482RTU5 A0A482RTU5_9ARCH | SGGSLPLLQW---LLEVKRCSLM-----D-----RASG--                 | 361 |
| tr A0A482SG35 A0A482SG35_9ARCH | V-----DSVVT-----                                         | 227 |
| tr A0A482RW94 A0A482RW94_9ARCH | -----                                                    | 169 |
| tr A0A482RV05 A0A482RV05_9ARCH | -----                                                    | 129 |
| tr A0A482RVR9 A0A482RVR9_9ARCH | P-----FFViEA-----                                        | 182 |
| tr A0A482SAN9 A0A482SAN9_9ARCH | -----SLPVVLQEAVDsAVNNSiDS-----SEN-----                   | 207 |
| tr A0A482RAR6 A0A482RAR6_9ARCH | -AEVEARIAW---GQAVNVVSGC-----EGIT--PLHAA-VSYFNAYLQrVASG-D | 316 |
| tr A0A482UQL2 A0A482UQL2_9ARCH | PTLTSPPLPW---IEGLVYVRHT-----                             | 251 |
| tr A0A482V091 A0A482V091_9ARCH | -----                                                    | 171 |
| tr A0A482S307 A0A482S307_9ARCH | -----                                                    | 158 |
| tr A0A482SRA1 A0A482SRA1_9ARCH | -----NLPSSiQILVDCG-----A-----DVN-----                    | 276 |
| tr A0A482RXE5 A0A482RXE5_9ARCH | -----                                                    | 80  |
| tr A0A482SVG8 A0A482SVG8_9ARCH | -NRAHSGi-----EY-----MQSELDESEVK-LNTANEEA-----            | 228 |
| tr A0A482UVH9 A0A482UVH9_9ARCH | -----                                                    | 82  |
| tr A0A482RQW7 A0A482RQW7_9ARCH | --GECPSRSL---iETIRYCSiY-----C-----I-----                 | 138 |
| tr A0A3A5UT62 A0A3A5UT62_9EURY | -----                                                    | 279 |
| tr A0A482UPW1 A0A482UPW1_9ARCH | -----PGESQK-iDRITDAFS-----                               | 15  |
| tr A0A7C5RN86 A0A7C5RN86_9ARCH | -DCWANRKPW---SEHVYYTYKF-----VRACL-GEELA-VYAMRHHVG-----   | 47  |
| tr A0A7C4ZF49 A0A7C4ZF49_9ARCH | -DCWANQRPL---PEHVYYTYKF-----VKDCL-GEELA-VHAMRHHVE-----   | 64  |
| tr A0A524F3J3 A0A524F3J3_9ARCH | PERYRKiPPF---PF-G---SK-----D-----                        | 63  |
| tr A0A7J2X8Y9 A0A7J2X8Y9_9EURY | -----RGYVPLPiKISiKNSKN-----IVAFGGEINTSiCILSRN-----       | 324 |
| tr A0A482RV58 A0A482RV58_9ARCH | -----                                                    | 130 |
| tr A0A2E8V4G5 A0A2E8V4G5_9EURY | SDGWGLLQS----PSSIT--Q-----GAFFGRSiSVSGDiNNDGFNDLVV-----  | 563 |

|                                |                                                          |     |
|--------------------------------|----------------------------------------------------------|-----|
| tr A0A7K4DTG4 A0A7K4DTG4_9ARCH | NMKWTKLQSE---TMHIPQLTRT-----S-----                       | 67  |
| tr H6Q7G6 H6Q7G6_PYROT         | -----                                                    | 82  |
| tr A0A7J2XB36 A0A7J2XB36_9EURY | -----                                                    | 53  |
| tr A0A662LIL0 A0A662LIL0_9EURY | -----                                                    | 53  |
| tr A0A7L4PAM3 A0A7L4PAM3_9CREN | -----                                                    | 83  |
| tr A4WL18 A4WL18_PYRAR         | -----                                                    | 83  |
| tr A0A2D6X683 A0A2D6X683_9ARCH | -----                                                    | 86  |
| tr A0A151E9R7 A0A151E9R7_9EURY | -----RGYVPEPIEVNYNKK-----ILSVGAGENITGAVSHDK-----         | 398 |
| tr A0A497EKV5 A0A497EKV5_9ARCH | -----                                                    | 0   |
| tr A0A482SQW3 A0A482SQW3_9ARCH | -----                                                    | 95  |
| tr A0A2E5RC13 A0A2E5RC13_9EURY | -----                                                    | 128 |
| tr A0A2E9DYS3 A0A2E9DYS3_9EURY | NDTWGDLSQSS---PSSIT--Q-----GAFFGRSISTSGDINNDGFNDLVV----- | 563 |
| tr A0A524DJL4 A0A524DJL4_9ARCH | PERYRKIPPF--PF-G---SH-----D-----                         | 63  |
| tr A0A497HLC9 A0A497HLC9_9EURY | LKKYISIRES---PI-----                                     | 217 |
| tr A0A7C4S6U6 A0A7C4S6U6_9ARCH | -----                                                    | 89  |
| tr A0A7J4LRK9 A0A7J4LRK9_9ARCH | -----                                                    | 0   |
| tr A0A7K4IJU2 A0A7K4IJU2_9ARCH | -----                                                    | 109 |
| tr A0A2D9NJM7 A0A2D9NJM7_9EURY | SDGWGLLSQSS---PSSIT--Q-----GAFFGRSISVSGDINNDGFNDLVV----- | 563 |
| tr A0A5A7S0K7 A0A5A7S0K7_9EURY | -----                                                    | 0   |
| tr A0A202E9J8 A0A202E9J8_9EURY | DDLWALARDHENGPGDDSI CRHPE-PGLTKHSFGQLTTASAA-----         | 348 |
| tr A0A7J4TTH8 A0A7J4TTH8_9ARCH | -----                                                    | 0   |
| tr A0A2E6BWJ1 A0A2E6BWJ1_9EURY | --CDEKKPTF---LYHG---SN-----S-----                        | 27  |
| tr A0A7J4I1H7 A0A7J4I1H7_9ARCH | -NTWIPTN-----YP--KT-----LEAHEPGSGY-----P-----            | 44  |
| tr A0A7C6DZH7 A0A7C6DZH7_9ARCH | -DCWANRKPW---SEHVYYTYKF-----VRACL-GEELA-VYAMRHHVG-----   | 58  |
| tr A0A662JAF1 A0A662JAF1_9CREN | -----                                                    | 53  |
| tr A0A151ENE1 A0A151ENE1_9EURY | -----RGYVPEPIAVNYDKK-----ILSVGAGENITGAVSHDK-----         | 398 |
| tr A0A2U3CK81 A0A2U3CK81_HEIAB | -LDWHGNPSS---DEETIN--DI-----INKLEKEETVV-VSDFN-----       | 298 |
| tr A0A2U9ILS6 A0A2U9ILS6_9CREN | -----                                                    | 0   |
| tr A0A1V4YZZ9 A0A1V4YZZ9_9EURY | -----                                                    | 46  |
| tr A0A0X8UZZ7 A0A0X8UZZ7_9EURY | -----SLSRNSPICPTCGIPLNMSPTF--ALEGSVT-----                | 272 |
| tr A0A1H6TIC6 A0A1H6TIC6_9EURY | -----                                                    | 0   |
| tr A0A7C0UA16 A0A7C0UA16_9ARCH | -----                                                    | 49  |

## Fungi

|                                |                                  |     |
|--------------------------------|----------------------------------|-----|
| sp Q9H8W4 PKHF2_HUMAN          | -----QSLKS---PLND-----MSDDDDDDSS | 248 |
| tr A0A2Z6RA14 A0A2Z6RA14_9GLOM | ---DL-----A-----PGIHVWDLV-----S  | 745 |
| tr A0A397VBS0 A0A397VBS0_9GLOM | ---DL-----A-----PGIHIWNSST---G   | 459 |
| tr A0A015IGQ3 A0A015IGQ3_RHIIW | ---DL-----A-----PGIHVWDLV-----G  | 785 |

|                                |                                                         |      |
|--------------------------------|---------------------------------------------------------|------|
| tr A0A397TNA4 A0A397TNA4_9GLOM | ---DL-----A-----PGIHVWDLV-----G                         | 780  |
| tr A0A015KA47 A0A015KA47_RHIIW | ---DL-----A-----PGIHVWDLV-----G                         | 785  |
| tr A0A015IQ23 A0A015IQ23_RHIIW | ---DL-----A-----PGIHVWDLV-----G                         | 785  |
| tr A0A2I1G6N8 A0A2I1G6N8_9GLOM | ---DL-----A-----PGIHVWDLV-----G                         | 785  |
| tr A0A2I1F0G8 A0A2I1F0G8_9GLOM | ---DL-----A-----PGIHVWDLV-----G                         | 785  |
| tr U9SXZ4 U9SXZ4_RHIID         | ---DL-----A-----PGIHVWDLV-----G                         | 785  |
| tr A0A372RFQ0 A0A372RFQ0_9GLOM | ---DL-----A-----PGIHVWDLV-----G                         | 786  |
| tr A0A4P9YZL8 A0A4P9YZL8_9FUNG | ---D-----M-----LRSRTMNFVQ----S                          | 447  |
| tr A0A4V1IX88 A0A4V1IX88_9FUNG | ---Q-----A-----MRLRSLTFVA----A                          | 446  |
| tr A0A4P9ZP44 A0A4P9ZP44_9FUNG | ---DN-----R-----MGMP LCS-----                           | 456  |
| tr A0A0L0HGC7 A0A0L0HGC7_SPIPD | -----E-----S-----                                       | 673  |
| tr A0A177WRZ8 A0A177WRZ8_BATDL | -----HPLS-----ID-----D--                                | 515  |
| tr F4P650 F4P650_BATDJ         | -----HPLS-----ID-----D--                                | 557  |
| tr A0A1Y1X2T5 A0A1Y1X2T5_9FUNG | -----KNKR-----ILE----LANSSKDAE-N                        | 374  |
| tr A0A507FBG2 A0A507FBG2_9FUNG | -----LQALPSLPVEPIDDYCDD---SLTTKHYTG NAGVEMRRRASS-----   | 474  |
| tr A0A1Y1X1V7 A0A1Y1X1V7_9FUNG | -----KPKR-----VLE----LSSS-QFSE-E                        | 608  |
| tr A0A4V1IY93 A0A4V1IY93_9FUNG | -----KNKR-----IKE----LAIPDKNAE-N                        | 524  |
| tr A0A1Y1X677 A0A1Y1X677_9FUNG | -----KNKR-----IKE----LAIPDKNAE-N                        | 701  |
| tr A0A137P479 A0A137P479_CONC2 | ---TL-----A-----LGLRRYSLIN----Y                         | 867  |
| tr A0A507EFA4 A0A507EFA4_9FUNG | -----L-----LARRSFDIP-----                               | 652  |
| tr A0A507CXB0 A0A507CXB0_9FUNG | -----SP-----TLGSG-----GSSGDEDES                         | 526  |
| tr A0A1S8W822 A0A1S8W822_9FUNG | -----HSL S-----IN-----E--                               | 537  |
| tr A0A397IVX3 A0A397IVX3_9GLOM | ---DE-----T-----PRIRVLNQT T----S                        | 725  |
| tr A0A139AK54 A0A139AK54_GONPJ | -----VP-----TNPSG-----VESIR                             | 242  |
| tr A0A4P9WLC0 A0A4P9WLC0_9FUNG | -----HSLDPSALL--ST--LAA--LAGSASPP--RLEPRLEIT-----EPP    | 705  |
| tr A0A1Y1WA63 A0A1Y1WA63_9FUNG | -----TLE-----DDL TN-G-----FQDIEIII                      | 486  |
| tr A0A0E9ND18 A0A0E9ND18_SAICN | -----HSLDPSALL--ST--LAA--LAGSASPP--RLEPRLEIT-----EPP    | 972  |
| tr A0A2G5BFQ4 A0A2G5BFQ4_COERN | -----HSLDPSALL--ST--LAA--LAGSASPP--RLEPRLEIT-----EPP    | 386  |
| tr A0A0W4ZGN5 A0A0W4ZGN5_PNEJ7 | -----Q-----SNLNVSESIT----S                              | 609  |
| tr A0A167MKJ0 A0A167MKJ0_CALVF | -----N-----                                             | 641  |
| tr A0A165DP15 A0A165DP15_9BASI | -----R-----                                             | 642  |
| tr M5FY58 M5FY58_DACPD         | -----H-----                                             | 640  |
| tr A0A1Y2IJD5 A0A1Y2IJD5_PYCCO | -----H-----                                             | 355  |
| tr A0A1Y2IIH2 A0A1Y2IIH2_PYCCO | -----H-----                                             | 526  |
| tr A0A1Y2CRY6 A0A1Y2CRY6_9FUNG | -----H-----                                             | 154  |
| tr M9MDT8 M9MDT8_PSEA3         | -----P-I-----                                           | 154  |
| tr A0A0L0SM81 A0A0L0SM81_ALLM3 | ---DSYTAPESAEMSSVPSTSTDDSVAN---ALGA-----YRLT-SDVDTDAE-G | 1050 |
| tr A0A1M2VA80 A0A1M2VA80_TRAPU | -----VDAHG-----HDTA--TQ                                 | 610  |
| tr A0A2H3IXF5 A0A2H3IXF5_WOLCO | -----H-----                                             | 656  |
| tr A0A4Q9MH65 A0A4Q9MH65_9APHY | -----H-----                                             | 558  |
| tr A0A5E3XNR7 A0A5E3XNR7_9AGAM | -----E-----R-----                                       | 627  |
| tr A0A5C3FP20 A0A5C3FP20_PSEA2 | -----E-----R-----                                       | 639  |
| tr A0A081CEI2 A0A081CEI2_PSEA2 | ---DAYTAPESAEMSSVPSTSTDDSVAN---ALGA-----YRLT-SDVDTDAE-G | 1003 |
| tr K5WQA6 K5WQA6_PHACS         | ---DAYTAPESAEMSSVPSTSTDDSVAN---ALGA-----YRLT-SDVDTDAE-G | 1050 |
| tr A0A0H2S726 A0A0H2S726_9AGAM | -----H-----                                             | 538  |
|                                | -----H-----                                             | 617  |

|                                |                                                           |      |
|--------------------------------|-----------------------------------------------------------|------|
| tr A0A165Z002 A0A165Z002_9AGAM | -----E-----R-----                                         | 642  |
| tr A0A481SFP1 A0A481SFP1_9BASI | ---EVVAPPASAEISSVPSTSTDESMAN---ALRA-----NRIA-SDVDTDAE-G   | 1114 |
| tr A0A1Y1YYR8 A0A1Y1YYR8_9FUNG | -----QVE-----TK-----                                      | 413  |
| tr A0A4Q9NS61 A0A4Q9NS61_9APHY | -----                                                     | 627  |
| tr A0A4Q9Q5Q4 A0A4Q9Q5Q4_9APHY | -----                                                     | 627  |
| tr A0A5C3NHQ1 A0A5C3NHQ1_9AGAM | -----A-----V-----                                         | 646  |
| tr A0A481SI77 A0A481SI77_9BASI | ---EAVAPPASAEISSVPSTSTDESMAN---ALGA-----IRIA-SDVDTDAE-G   | 1054 |
| tr S8FM81 S8FM81_FOMPI         | -----                                                     | 534  |
| tr A0A2G8SBX2 A0A2G8SBX2_9APHY | -----                                                     | 645  |
| tr A0A137NR99 A0A137NR99_CONC2 | -----SDSNSSLPTL-----LQ-TTP-----                           | 399  |
| tr A0A1Y1Z786 A0A1Y1Z786_9FUNG | -----N-NERKYSDDSDSDPETAG-----SSY-----P                    | 288  |
| tr A0A5C3ERJ4 A0A5C3ERJ4_9BASI | ---EAIAAPDSAEMSSVPSTSTDESVAQ---TLRA-----YRIA-SDFDTDAE-G   | 1049 |
| tr A0A165BJR9 A0A165BJR9_9APHY | -----                                                     | 640  |
| tr A0A164UM97 A0A164UM97_9AGAM | -----                                                     | 620  |
| tr A0A0D7AXV4 A0A0D7AXV4_9AGAR | -----S-----E-----                                         | 616  |
| tr A0A6A6HW15 A0A6A6HW15_9PLEO | TLYQ-----GSMEPRN-----ARVE---DSFD---                       | 266  |
| tr A0A165L4G7 A0A165L4G7_9APHY | -----                                                     | 631  |
| tr A0A2N8UMQ8 A0A2N8UMQ8_9BASI | TAEAVVAAPDSAEMSSVPSSSTDDSV AQ---ALGA-----YQIGVSDGDTDAD-G  | 1082 |
| tr V5GIZ1 V5GIZ1_KALBG         | AASDATTGADSVEMSSAPSTSTDDSVSQ---ALGG-----LRIGASDTDTDAE-G   | 719  |
| tr A0A2T2PC27 A0A2T2PC27_CORCC | TLYQ-----GSMEPRN-----ARVE---DSFD---                       | 266  |
| tr A0A0L0HIX4 A0A0L0HIX4_SPIPD | -----Q-----P-----                                         | 437  |
| tr A0A5C2U016 A0A5C2U016_9APHY | -----                                                     | 629  |
| tr A0A5C2SLU6 A0A5C2SLU6_9APHY | -----                                                     | 629  |
| tr A0A2R6PJ56 A0A2R6PJ56_9APHY | -----                                                     | 904  |
| tr A0A074RVC0 A0A074RVC0_9AGAM | -----TFM-SSR                                              | 966  |
| tr X8IWG9 X8IWG9_9AGAM         | -----TFM-SSR                                              | 966  |
| tr A0A067Q7F2 A0A067Q7F2_9AGAM | -----I-----I-----                                         | 685  |
| tr E6ZVA4 E6ZVA4_SPORE         | TAEAVAAAPDSAEMSSVPSSSTDDSV AQ---ALGA-----YQIGVSDGDTDAD-G  | 1080 |
| tr A0A3N4I9X6 A0A3N4I9X6_ASCIM | -----H-----HHKHKQP RN-----ARVE---DDDD---                  | 255  |
| tr A0A0C3NH87 A0A0C3NH87_PHLGI | -----                                                     | 646  |
| tr A0A166A0Y0 A0A166A0Y0_9AGAM | -----                                                     | 655  |
| tr A0A0F7RZL7 A0A0F7RZL7_9BASI | AAEAMATAPDSAEMSSVPSSSTDESVAQ---TLGA-----YQIGALDGD TDAE-A  | 1077 |
| tr A0A6A5VUJ0 A0A6A5VUJ0_9PLEO | TLYQ-----GSMEPRN-----PRVE---DSFD---                       | 266  |
| tr A0A6G6FQD5 A0A6G6FQD5_9APHY | -----                                                     | 651  |
| tr A0A0B7F915 A0A0B7F915_THACB | -----TIM-ALR                                              | 950  |
| tr Q8NJX4 Q8NJX4_USTMD         | --AEASAAPDSADMSSVPTTGTDG SVAQ---AFGA-----YRIGASDAD TDAE-G | 1062 |
| tr R9PB35 R9PB35_PSEHS         | TVVATSVAPDSADMSSVPSTGTDESVAQ---TLDA-----YRMGTSGTETDVE-S   | 1051 |
| tr A0A077R837 A0A077R837_9BASI | ---ETMIAPDSAEMFVSPSTSTDDSVTH---TLEA-----YRMI-SDID TDAE-G  | 1055 |
| tr A0A0D1E146 A0A0D1E146_USTMA | --AEASAAPDSADMSSVPTTGTDG SVAQ---AFGA-----YRIGASDAD TDAE-G | 1062 |
| tr A0A1K0FWK6 A0A1K0FWK6_9BASI | -EDANAVGPDNAEMSLVPSTSTDDSV AQ---TLGA-----YRFA-SDLDT DVEAG | 1085 |
| tr A0A4U7KNT8 A0A4U7KNT8_9BASI | TAEAMATAPDSAEMSSVPSSSTDES VTQ---ALSA-----YHIGASDGDTDAE-V  | 1081 |
| tr A0A4T0IBV4 A0A4T0IBV4_WALIC | -----TT-----Q-A-----RCQDS-EV-                             | 854  |
| tr R9AV38 R9AV38_WALI9         | -----TT-----Q-A-----RCQDS-EV-                             | 854  |
| tr A0A4T0J9U8 A0A4T0J9U8_WALIC | -----TT-----Q-A-----RCQDS-GV-                             | 854  |
| tr I2FM96 I2FM96_USTH4         | -EDANAVGPDIAEMPLVPSTSTDDSV AQ---TLGA-----YRFA-SDLDT DVEAG | 1084 |

|                                |                                                          |      |
|--------------------------------|----------------------------------------------------------|------|
| tr A0A177BYI1 A0A177BYI1_9PLEO | TLYQ-----GSMEPRN-----PRVE---DSFD----                     | 266  |
| tr A0A5C3M448 A0A5C3M448_9AGAR | -----E--R--S-----                                        | 692  |
| tr A0A0W0G1I7 A0A0W0G1I7_9AGAR | -----IDMTH-----                                          | 881  |
| tr V2X232 V2X232_MONRO         | -----IDMTH-----                                          | 881  |
| tr A0A6A5UD68 A0A6A5UD68_9PLEO | TLYQ-----GSMEPPS-----ARVE---DSFD----                     | 265  |
| tr A0A507ES66 A0A507ES66_9FUNG | -----E-----S-----                                        | 688  |
| tr A0A0K6FN13 A0A0K6FN13_9AGAM | -----TLM-SSR-----                                        | 960  |
| tr A0A5M9KV80 A0A5M9KV80_9PLEO | TLYQ-----G-----SMEPRN-----ARVE---DSFD----                | 266  |
| tr A0A2W1CTG6 A0A2W1CTG6_9PLEO | TLYQ-----G-----SMEPRN-----ARVE---DSFD----                | 266  |
| tr A0A6S6V7N3 A0A6S6V7N3_9PLEO | TFYQ-----G-----SMEPRN-----ARVE---DSFD----                | 266  |
| tr B2W9Q9 B2W9Q9_PYRTR         | TLYQ-----G-----SMEPRN-----ARVE---DSFD----                | 266  |
| tr A0A316ZS75 A0A316ZS75_9PLEO | TLYQ-----G-----SMEPRN-----ARVE---DSFD----                | 266  |
| tr A0A6A6RWR3 A0A6A6RWR3_9PLEO | TMYQ-----GSMEPRS-----ARVE---DSFD----                     | 265  |
| tr A0A1Y2AFM9 A0A1Y2AFM9_9FUNG | -----YGN---IDFNDSDF--YGNDYIDSFDTSN-----RYGATSSKEDDDIQ    | 278  |
| tr A0A1Y2GJ54 A0A1Y2GJ54_9FUNG | -----INS---LGGPAELVPATSKPAQSSSSKPSM-----VQPPNPLSEDEDLK   | 397  |
| tr A0A316VEC8 A0A316VEC8_9BASI | -----ASTPATN---VEQ---CIHA-----SRALDSASLP                 | 935  |
| tr A0A6A5QBT9 A0A6A5QBT9_AMPQU | TLYQ-----G-----AMEPRS-----ARID---DSFD----                | 267  |
| tr A0A6A6ZW62 A0A6A6ZW62_9PLEO | TLYQ-----G-----SMEPRS-----ARVE---DSFD----                | 266  |
| tr A0A317XKP1 A0A317XKP1_9BASI | VSSDAEPELTSAEMTSAP--STDESIST---ALSN-----YRLD--SDGGDDADAD | 1025 |
| tr A0A5C3F116 A0A5C3F116_9BASI | -----PAAAAAEPLTSSTRQTVTG--VNMAAAPSDGVSVSGRSGSSSGLF--DSD  | 1044 |
| tr A0A177WUX8 A0A177WUX8_BATDL | -----S-----P-----                                        | 518  |
| tr F4P7P0 F4P7P0_BATDJ         | -----S-----P-----                                        | 518  |
| tr A0A6A6V864 A0A6A6V864_9PLEO | TLYQ-----SSMEPRS-----ARVE--ADSFD----                     | 176  |
| tr N1QHA6 N1QHA6_SPHMS         | TLWQ-----TSGMSGTESALG-----GGTDRMQPRD-----ARVT--DDSFD---- | 286  |
| tr A0A2V1DU97 A0A2V1DU97_9PLEO | TLYQ-----GSMEPRS-----ARVE---DSFD----                     | 265  |
| tr A0A6A6TFR8 A0A6A6TFR8_9PLEO | TLYQ-----RSMEPRS-----ARVE--TDSFD----                     | 266  |
| tr A0A550CL33 A0A550CL33_9AGAR | -----SNDITGT-----                                        | 707  |
| tr A0A284S9X6 A0A284S9X6_ARMOS | -----H--VPPE-----                                        | 671  |
| tr A0A0C3Q7C3 A0A0C3Q7C3_9AGAM | -----SPTSVSFSQI-----R-----                               | 681  |
| tr A0A367KQZ9 A0A367KQZ9_RHIST | -----KIPESLPAQ-----PQPVADDNEFD----                       | 259  |
| tr A0A074VKM0 A0A074VKM0_9PEZI | P-----GRMQARD-----ARVA--EDSFD----                        | 259  |
| tr ROITW9 ROITW9_SETT2         | TLYQ-----G-----SMEPRN-----ARVE---DSFD----                | 266  |
| tr A0A1Y2EN19 A0A1Y2EN19_9BASI | -----N-----PIQ-----                                      | 985  |
| tr A0A507BW7 A0A507BW7_9FUNG   | -----SS-----PGG-----DDDDEAEQS                            | 544  |
| tr A0A6A6JKH9 A0A6A6JKH9_9PLEO | TLYQ-----RSMEPRS-----ARVE--FDNFD----                     | 264  |
| tr A0A3N4M7C5 A0A3N4M7C5_9PEZI | SRN-----K-----PPAPSMQPRN-----ARVE--DDDD----              | 270  |
| tr A0A6A5JXY0 A0A6A5JXY0_9PLEO | TLYQ-----G-----SMEPRN-----ARVE---DSFD----                | 266  |
| tr A0A6G1IPA9 A0A6G1IPA9_9PLEO | TLYQ-----GSMEPRS-----ARVE---DSFD----                     | 266  |
| tr A0A0D7A3M6 A0A0D7A3M6_9AGAR | -----L-SPTMS-----                                        | 659  |
| tr A0A0C3B4B2 A0A0C3B4B2_9AGAM | -----TTL-----                                            | 682  |
| tr A0A067MUV1 A0A067MUV1_9AGAM | -----S-----APSF-----                                     | 732  |
| tr A0A0P1BAI6 A0A0P1BAI6_9BASI | --VLP--EPSPAA-QSDTSRSTDFS-----TSD-----S                  | 898  |
| tr A0A0D0C6Q8 A0A0D0C6Q8_9AGAR | -----GES-TVTR-----                                       | 986  |
| tr A0A197JU28 A0A197JU28_9FUNG | -----AE-----ISP-I-----ESPG                               | 1074 |
| tr A0A178AI31 A0A178AI31_9PLEO | TLYQ-----G-----SMEPRS-----ARVD---DSFD----                | 266  |

|                                |                                                      |      |
|--------------------------------|------------------------------------------------------|------|
| tr A0A316W3E2 A0A316W3E2_9BASI | --VLP--EPSPAA-QSDTSRSTDFS-----TSD-----S              | 898  |
| tr A0A316YEW3 A0A316YEW3_9BASI | ---EDEEEEEEGEE---EEEHED-----EGVLSSSSNIHKVDS---D      | 961  |
| tr A0A1Y2GHB3 A0A1Y2GHB3_9FUNG | -----IS-----SEP-L-----LADA                           | 1116 |
| tr A0A6A4GV68 A0A6A4GV68_9AGAR | -----GDS-TIR                                         | 457  |
| sp O13821 VPS27_SCHPO          | -----KTRKT-PS---KPV---TNED---                        | 262  |
| tr A0A317T2J4 A0A317T2J4_9PEZI | VQK-----Q---KPNSLMQPRN---ARVE---DDDD---              | 263  |
| tr A0A6S6WPJ0 A0A6S6WPJ0_9PLEO | TLYQ-----G-----SMEPRN---ARVE---DSFD---               | 266  |
| tr E3RQL4 E3RQL4_PYRTT         | TLYQ-----G-----SMEPRN---ARVE---DSFD---               | 266  |
| tr A0A0C9WXY8 A0A0C9WXY8_9AGAR | -----S---NLPE-----                                   | 664  |
| tr F8P7Z0 F8P7Z0_SERL9         | -----SEASSPFPRLTSPPTP-----                           | 865  |
| tr F8Q904 F8Q904_SERL3         | -----SEASSPFPRLTSPPTP-----                           | 762  |
| tr A0A292PL22 A0A292PL22_9PEZI | GQK-----Q---KPNNLMQPRN---ARVE---DDDD---              | 263  |
| tr A0A1Y1XKQ0 A0A1Y1XKQ0_9FUNG | -----DAS---FDFNDSEF--YVN-DYMDNFDSSN---RHAAISSQEEDDIK | 299  |
| sp Q0U4Z8 VPS27_PHANO          | TLYQ-----G-----AMEPRS---ARVD---DSFD---               | 266  |
| tr A0A6A6D0R8 A0A6A6D0R8_9PEZI | TLWQ-----GSSV-----GQERMQPRG---ARVT---EDSFD---        | 271  |
| tr A0A1Y1UY75 A0A1Y1UY75_9FUNG | -----                                                | 641  |
| tr A0A6A6QQF5 A0A6A6QQF5_9PEZI | TLYQ-----GSMEPRN---ARVE---DSFD---                    | 265  |
| tr A0A168QCU4 A0A168QCU4_MUCCL | -----                                                | 62   |
| tr A0A0D2PBI9 A0A0D2PBI9_HYPSF | -----TSED-----                                       | 746  |
| tr U4LJ46 U4LJ46_PYROM         | SRR-----V---APSASMQPRN---ARVE---QDDD---              | 266  |
| tr A0A2T6ZAZ1 A0A2T6ZAZ1_TUBBO | VQK-----Q---KPNNLMQPRN---ARVE---DDDD---              | 238  |
| tr A0A4U0WTC3 A0A4U0WTC3_9PEZI | TLYQ-----GY-----TQSPMQPRS---ARVE---DSFD---           | 269  |
| tr A0A4S8LNE8 A0A4S8LNE8_DENBC | -----SSSV-SMERVDEDEEEKG-----NDED-TIR                 | 1188 |
| tr A0A4V1IUA8 A0A4V1IUA8_9FUNG | -----AAA---AA-----AEQ---                             | 254  |
| tr L0P8I6 L0P8I6_PNEJ8         | -----                                                | 105  |
| tr R7Z380 R7Z380_CONA1         | TLYQ-----GY-----Q-GSMEPRS---ARVE---DSFD---           | 265  |
| tr E4ZXS6 E4ZXS6_LEPMJ         | TLYQ-----S-----SMQPRS---ARVE---DSFD---               | 371  |
| tr A0A168Q840 A0A168Q840_MUCCL | -----PVA---AA---APIDKKEDDYD---                       | 261  |
| tr A0A0C2S3H8 A0A0C2S3H8_AMAMU | -----S---SRSKEGSNSEN-----                            | 801  |
| tr A0A0C9N4H5 A0A0C9N4H5_9FUNG | -----PVA---A---APIDKKEDDYD---                        | 260  |
| tr R4XHH8 R4XHH8_TAPDE         | PDYQ-----AQTPK---RHVSRAGDTED---                      | 263  |
| tr A0A0B7NCZ8 A0A0B7NCZ8_9FUNG | -----RGLLELTEKDNEKD---LHNMVAYG-----GVD-ALI           | 128  |
| tr A0A163F5K2 A0A163F5K2_DIDRA | TLYQ-----G-----AMEPRN---PRVE---DSFD---               | 266  |
| tr A0A6A6YA67 A0A6A6YA67_9PEZI | TLYQ-----GSMEPRS---ARVE---DSFD---                    | 265  |
| tr A0A5C3KRI4 A0A5C3KRI4_9AGAR | -----DKPK-----                                       | 701  |
| tr A0A0C2YUU7 A0A0C2YUU7_HEBCY | -----DAER-----                                       | 758  |
| tr G4T9B0 G4T9B0_SERID         | -----GNHGL-----                                      | 911  |
| tr A0A367JD28 A0A367JD28_RHIAZ | -----KTT---NI---PQP-QPENDFD---                       | 260  |
| tr A0A367JX58 A0A367JX58_RHIAZ | -----KTP---NI---PQP-QPENDFD---                       | 260  |
| tr A0A0M8MVG5 A0A0M8MVG5_9BASI | -----RLSRLYSMLRLSSSA-----TSP-TED                     | 183  |
| tr S2JXE4 S2JXE4_MUCC1         | -----ATA---AP---APADKKEDDYD---                       | 261  |
| tr A0A286USL7 A0A286USL7_9AGAM | -----                                                | 633  |
| tr A0A067NSG1 A0A067NSG1_PLEOS | -----S-----                                          | 656  |
| tr A0A316ZLR8 A0A316ZLR8_9BASI | --SQPLEPIEPAA-----                                   | 990  |
| tr A0A4T0G0A2 A0A4T0G0A2_9BASI | -----TT-----P-G-----KRRDE-DS-                        | 833  |

|                                |                                                    |      |
|--------------------------------|----------------------------------------------------|------|
| tr A0A075ARC6 A0A075ARC6_ROZAC | -----                                              | 269  |
| tr A0A4V1IZA8 A0A4V1IZA8_ROZAC | -----                                              | 269  |
| tr A0A3M7M1P8 A0A3M7M1P8_9PLEO | TLYQ-----G-----SMEPRN---ARVE---DSFD---             | 278  |
| tr D5GD30 D5GD30_TUBMM         | VQK-----Q-----KPNNLMQPRN---ARVE---DDDD---          | 263  |
| tr A0A1X7RQY2 A0A1X7RQY2_ZYMTR | SLWQ-----GANA-----STDRMQPRG---ARVT---EDSFD---      | 271  |
| tr A0A1Y6LJF9 A0A1Y6LJF9_ZYMTR | SLWQ-----GANA-----STDRMQPRG---ARVT---EDSFD---      | 271  |
| tr A0A2H1GBB8 A0A2H1GBB8_ZYMTR | SLWQ-----GANA-----STDRMQPRG---ARVT---EDSFD---      | 271  |
| tr F9X9I8 F9X9I8_ZYMTI         | SLWQ-----GANA-----STDRMQPRG---ARVT---EDSFD---      | 271  |
| tr A0A6A6A070 A0A6A6A070_9PLEO | TLYQ-----G-----SMEPRS---ARVE---DSFD---             | 266  |
| tr B0DJQ4 B0DJQ4_LACBS         | -----S---NLPE-----                                 | 664  |
| tr A0A369JTG7 A0A369JTG7_HYPMA | -----E---ISHK-----                                 | 721  |
| tr I4YHW0 I4YHW0_WALMC         | -----TT-----H-G-----KT-----                        | 819  |
| tr A0A507CTR3 A0A507CTR3_9FUNG | -----ING-----HSSDSR---NVEDVVRQEQUEEFE              | 600  |
| tr F4RZR0 F4RZR0_MELLP         | -----LS-----PTP-N-----RPHDDLDT                     | 1033 |
| tr A0A4T0WVM5 A0A4T0WVM5_9ASCO | -----ASTNK-----KEIDIGEDDDDEIK                      | 260  |
| tr A0A150VI72 A0A150VI72_9PEZI | TLWQ-----ESSL--VR-----DTSNRMQPRS---ARA---EDSFD---  | 278  |
| tr A0A3M6ZNS9 A0A3M6ZNS9_HORWE | TLWQ-----DSGMGVS---AAEARMHPRS---ARVDVDDSHFD---     | 285  |
| tr A0A1Y1XRY0 A0A1Y1XRY0_9FUNG | -----PPT-----VY-----                               | 416  |
| tr A0A074WRI8 A0A074WRI8_9PEZI | S-----GRMQARD---PRVA---EDSFD---                    | 259  |
| tr A0A6A7BU37 A0A6A7BU37_9PEZI | TLWQ-----ESGIDRQP-----EPQSQPQS---AL---SDDRFD---    | 260  |
| tr K1WTE0 K1WTE0_TRIAC         | -----G-----RTPRSRRDFDADLQ                          | 257  |
| tr J6EPC0 J6EPC0_TRIAS         | -----G-----RTPRSRRDFDADLQ                          | 257  |
| tr A0A3N4JEN9 A0A3N4JEN9_9PEZI | VQK-----Q-----KPNNLMQPRN---ARVE---DDDD---          | 263  |
| tr N1QCW3 N1QCW3_PSEFD         | TLWQ-----DSGMGR-----SGSERMQPRG---ARVT---EDSFD---   | 280  |
| tr M2STQ7 M2STQ7_COCH5         | TLYQ-----G-----SMEPRN---ARIE---DSFD---             | 266  |
| tr N4X1G1 N4X1G1_COCH4         | TLYQ-----G-----SMEPRN---ARIE---DSFD---             | 266  |
| tr A0A6A5SBR1 A0A6A5SBR1_9PLEO | TLYQ-----G-----SMEPRN---ARVE---DSFD---             | 266  |
| tr A0A1Y2LUT7 A0A1Y2LUT7_EPING | TLYQ-----G-----SMEPRN---PRVE---DSFD---             | 269  |
| tr E2LZL4 E2LZL4_MONPE         | -----IDTTH-----                                    | 517  |
| tr A0A067S9R7 A0A067S9R7_GALM3 | -----SGSTSA--TAAADAEL-----                         | 842  |
| tr L0PFS6 L0PFS6_PNEJ8         | -----N-----KSQSNLNVS                               | 210  |
| tr F4NZK1 F4NZK1_BATDJ         | -----TTG---LGASSTT-----STASSN---AHEDLAKKEDEDLA     | 280  |
| tr A0A3M7BVL5 A0A3M7BVL5_HORWE | TLWQ-----DSGMGVS---AAEARMHPRS---ARVDVDDSHFD---     | 277  |
| tr A0A5J5F2H1 A0A5J5F2H1_9PEZI | SKR-----V-----T-TSSVEPRS---ASVE---QDDD---          | 265  |
| tr A0A3M7GF14 A0A3M7GF14_HORWE | TLWQ-----DSGMGVS---AAEARMHPRS---ARVDVDDSHFD---     | 285  |
| tr A0A3M7EI93 A0A3M7EI93_HORWE | TLWQ-----DSGMGVS---AAEARMHPRS---ARVDVDDSHFD---     | 286  |
| tr A0A3M7A400 A0A3M7A400_HORWE | TLWQ-----DSGMGVS---AAEARMHPRS---ARVDVDDSHFD---     | 285  |
| tr A0A162Y6D2 A0A162Y6D2_MUCCL | -----RGLLELTEKDDEKD---LHNMVAYG-----GVD-ALI         | 128  |
| tr A0A4U0TZE6 A0A4U0TZE6_9PEZI | TLWQ-----DSGMGLSS-----RAESKMHPRS---ARLE---PESFD--- | 282  |
| tr A0A3M7DFE3 A0A3M7DFE3_HORWE | TLWQ-----DSGMGVS---AAEARMHPRS---ARVDVDDSHFD---     | 285  |
| tr A0A3M7C5L4 A0A3M7C5L4_HORWE | TLWQ-----DSGMGVS---AAEARMHPRS---ARVDVDDSHFD---     | 285  |
| tr A0A1Z5SW51 A0A1Z5SW51_HORWE | TLWQ-----DSGMGVS---AAEARMHPRS---ARVDVDDSHFD---     | 285  |
| tr A0A3M7IAA8 A0A3M7IAA8_HORWE | TLWQ-----DSGMGVS---AAEARMHPRS---ARVDVDDSHFD---     | 285  |
| tr A0A1Y1ZMB2 A0A1Y1ZMB2_9PLEO | TLYQ-----GSMEPRN---PRVE---DSFD---                  | 239  |
| tr A0A3M7EIE8 A0A3M7EIE8_HORWE | TLWQ-----DSGMGVS---AAEARMHPRS---ARVDVDDSHFD---     | 285  |



|                                |                                                      |     |
|--------------------------------|------------------------------------------------------|-----|
| tr A0A3M7FRT0 A0A3M7FRT0_HORWE | TLWQ-----DSGTGVSR-----AAEARMHPRS-----ARVDVDDSHFD---- | 285 |
| tr A0A3M6WMK4 A0A3M6WMK4_HORWE | TLWQ-----DSGMGVSR-----AAEARMHPRS-----ARVDVDDSHFD---- | 285 |
| tr A0A0W4ZU85 A0A0W4ZU85_PNEJ7 | -----ATYV-----                                       | 104 |
| tr A0A409Y3I3 A0A409Y3I3_9AGAR | -----KTP---NI---PQP-QPENDFD----                      | 882 |
| tr A0A1X0QT00 A0A1X0QT00_RHIZD | -----KTP---NI---PQP-QPENDFD----                      | 260 |
| tr A0A2G4SSF8 A0A2G4SSF8_RHIZD | G-----ARMQARD-----PRVA--EDSFD----                    | 260 |
| tr A0A4V4JT84 A0A4V4JT84_AURPU | G-----ARMQARD-----PRVA--EDSFD----                    | 338 |
| tr A0A4S9NID1 A0A4S9NID1_AURPU | G-----ARMQARD-----PRVA--EDSFD----                    | 259 |
| tr A0A4V4JPE1 A0A4V4JPE1_AURPU | G-----ARMQARD-----PRVA--EDSFD----                    | 259 |
| tr A0A4S8U3P8 A0A4S8U3P8_AURPU | G-----ARMQARD-----PRVA--EDSFD----                    | 259 |
| tr A0A4T0CLC8 A0A4T0CLC8_AURPU | G-----ARMQARD-----PRVA--EDSFD----                    | 259 |
| tr A0A4S8XK24 A0A4S8XK24_AURPU | G-----ARMQARD-----PRVA--EDSFD----                    | 259 |
| tr A0A4S9PXJ6 A0A4S9PXJ6_AURPU | G-----ARMQARD-----PRVA--EDSFD----                    | 259 |
| tr A0A4S9S1G3 A0A4S9S1G3_AURPU | G-----ARMQARD-----PRVA--EDSFD----                    | 259 |
| tr A0A4S9X121 A0A4S9X121_AURPU | G-----ARMQARD-----PRVA--EDSFD----                    | 259 |
| tr A0A4S9MIC5 A0A4S9MIC5_AURPU | G-----ARMQARD-----PRVA--EDSFD----                    | 259 |
| tr A0A4T0AAT4 A0A4T0AAT4_AURPU | G-----ARMQARD-----PRVA--EDSFD----                    | 259 |
| tr A0A4V4LMX5 A0A4V4LMX5_AURPU | G-----ARMQARD-----PRVA--EDSFD----                    | 259 |
| tr A0A4S9MD28 A0A4S9MD28_AURPU | G-----ARMQARD-----PRVA--EDSFD----                    | 259 |
| tr A0A4S9SZX6 A0A4S9SZX6_AURPU | G-----ARMQARD-----PRVA--EDSFD----                    | 259 |
| tr A0A4S8TGC0 A0A4S8TGC0_AURPU | G-----VRMQARD-----PRVA--EDSFD----                    | 259 |
| tr A0A4S9BBL0 A0A4S9BBL0_AURPU | G-----ARMQARD-----PRVA--EDSFD----                    | 259 |

## Plants

|                                 |                                                               |     |
|---------------------------------|---------------------------------------------------------------|-----|
| sp Q9H8W4 PKHF2_HUMAN           | PARSDSYSQSLKS-----PLNDMSDDDDDDSSD-----                        | 249 |
| tr A0A6T6RNY5 A0A6T6RNY5_9CHLO  | -LPRMRARSVSDLAPNASALRRILDD-----EIS-----                       | 155 |
| tr A0A1Q3D812 A0A1Q3D812_CEPFO  | QV-SHAAQSPINDLTDLSTLRSWNFPWQGSMEYEIYKAANTIRGYDKI-----         | 411 |
| tr A0A6J1KWW8 A0A6J1KWW8_CUCMA  | GDKATCSAVSPSSSST-----SIGSTKSDYT-----CHSAISNVNSTPCSN           | 151 |
| tr A0A443PY34 A0A443PY34_9MAGN  | SI-SNAVQVAKHDVMDWCTCRGWLNPVGLSMEDEIYKSTNTLRG-----             | 281 |
| tr A0A0K9PNH3 A0A0K9PNH3_ZOSMR  | GRKSHA EKARSKLLPM--QEDENITRFLEEGGNYPSS--SSNSQADMFSDLDTVTTSTSR | 142 |
| tr A0A6J1EUT4 A0A6J1EUT4_CUCMO  | GDKATCSAVSLSSSST-----SIGSSRSDYT-----CHSAISNVNSTPCSN           | 151 |
| tr A0A6J1EZX4 A0A6J1EZX4_CUCMO  | GDKATCSAVSLSSSST-----SIGSSRSDYT-----CHSAISNVNSTPCSN           | 151 |
| tr A0A0E0E2T1 A0A0E0E2T1_9ORYZ  | KI-SRACQIPTNDLTDLSTLRSWLNLWPARTMEYEIYKAVNSIYGYFK-----         | 350 |
| tr A0A0E0E2T0 A0A0E0E2T0_9ORYZ  | KI-SRACQIPTNDLTDLSTLRSWLNLWPARTMEYEIYKAVNSIYGYFKLLVLSVILE--S  | 360 |
| tr I0YJ19 I0YJ19_CO CSC         | TV-SHAVQPAVHDVTDASALRSWFNPPMAASLAAELYKATNIVRSFA-----          | 140 |
| tr A0A6A3A7M5 A0A6A3A7M5_HIBSY  | TI-SNAAQVAKHDVMDWACTRFWLNLPVGLSMEHEIYKASNILKS-----            | 150 |
| tr A0A7J0FIS1 A0A7J0FIS1_9ERIC  | TI-SNAMQAAKHDVMDWTCRSRSMNLPVGLSMEYEIYKSNLTRS-----             | 260 |
| tr A0A6I9U8S6 A0A6I9U8S6_SESIN  | TI-SNAAQAAKHDVMDWTCRSGWLNLFPVGLSMEHEIYKASTLRS-----            | 281 |
| tr A0A0D3F2U0 A0A0D3F2U0_9ORYZ  | RI-SRASQPPTNDVTDLSTLRSWLNFPYAHTMEYEIYKAANSLNSYCK-----         | 295 |
| tr I1NYS7 I1NYS7_ORYGL          | RI-SRASQPPTNDVTDLSTLRSWLNFPYAHTMEYEIYKAANSLNSYCK-----         | 340 |
| tr A0A6P6VUP2 A0A6P6VUP2_CO FAR | QV-SRAAQLPETHDLTDLSTLRSWNFPWQGSMEYEIYKATNTIRGY--T-----        | 496 |
| tr A0A6P6WBJ6 A0A6P6WBJ6_CO FAR | QV-SRAAQLPETHDLTDLSTLRSWNFPWQGSMEYEIYKATNTIRGY--T-----        | 496 |
| tr A0A068TKZ1 A0A068TKZ1_CO FCA | QV-SRAAQLPETHDLTDLSTLRSWNFPWQGSMEYEIYKATNTIRGY--T-----        | 496 |

|                                |                                                               |     |
|--------------------------------|---------------------------------------------------------------|-----|
| tr A0A5K0XTZ9 A0A5K0XTZ9_9MAGN | TI-SNAVQTAKHDVIDWTCTMRGWLNPVGLSMEQEIIYKATNALIS-----           | 297 |
| tr A0A392PZY2 A0A392PZY2_9FABA | TI-SNSVQAAKHDVMDWTCTARGWLNLPVIGVSMEHEIIYKASNTLRN-----         | 202 |
| tr A0A5P1EJS8 A0A5P1EJS8_ASPOF | SI-SNAMQSAKHDVMDWTCTRGWLNLPVGLSMEHEIIYKAANTLRS-----           | 275 |
| tr A0A6A3BAW0 A0A6A3BAW0_HIBSY | TI-SNAAQVAKHDVMDWTCTRGWLNLPVGLSMEHEIIYKASNTLRS-----           | 237 |
| tr A0A2Z7AUH1 A0A2Z7AUH1_9LAMI | TI-SNAVQVAKHDVMDWTCTSRGWLNLPVGLSMEHEIIYKASNTLRS-----          | 277 |
| tr A0A6P4A6D2 A0A6P4A6D2_ZIZJJ | SI-SNAVQVAKHDVMDWTCTRGWLNLPVGLSMEHEIIYKATNTLRS-----           | 285 |
| tr A0A7J6GHB9 A0A7J6GHB9_CANSA | QV-SHAAQLPTNDLTDLSTLRSWLNLPWGQSMEEYIIYKAANTIRAY--N-----       | 343 |
| tr A0A7J6H825 A0A7J6H825_CANSA | QV-SHAAQLPTNDLTDLSTLRSWLNLPWGQSMEEYIIYKAANTIRAY--N-----       | 352 |
| tr A0A0P0WXV7 A0A0P0WXV7_ORYSJ | KI-SRACQIPTNDLTDLSTLRSWLNLPWARTMEYIIYKAVNSIYGYFKVWPSYNSNT--C  | 360 |
| tr A0A6P6SN61 A0A6P6SN61_COFAR | TI-SNAVQVAKHDVMDWTCTMRGWLNPVGFSSMEQEIIYKASNTLRN-----          | 278 |
| tr A0A426YNR2 A0A426YNR2_ENSVE | SN-SNAVQSAKHDVTDWTCTMRGWLNPVGLCMEYIIYKATNTLRS-----            | 276 |
| tr M0TUZ8 M0TUZ8_MUSAM         | SN-SNAVQSAKHDVTDWTCTMRGWLNPVGLSMEYIIYKATNTLRS-----            | 276 |
| tr A0A2G9H231 A0A2G9H231_9LAMI | TI-SNAAQVAKHDVTDWTCTRGWLNLPVGLSMEHEIIYKASNTLRT-----           | 281 |
| tr A0A6P5XW21 A0A6P5XW21_DURZI | TI-SNAVQVAKHDVMDWTCTRGWLNLPVGLSMEHEIIYKASNTLRS-----           | 287 |
| tr A0A6A2YCQ0 A0A6A2YCQ0_HIBSY | SI-SNASQVAKHDVMDWTCTRGWLNLPVGLSMEHEIIYKASNTLRS-----           | 291 |
| tr A0A0E0LCH3 A0A0E0LCH3_ORYPU | KI-SRACQIPTNDLTDLSTLRSWLNLPWARTMEYIIYKAVNSIYGYFK-----         | 291 |
| tr A0A4D8ZKB4 A0A4D8ZKB4_SALSN | RV-SRAAQSPTHDLTDLSTLRSWLNFPWGLSMEHEIIYKAANTLQGYTKCEKPVPLFV--G | 290 |
| tr A0A4D8XQ43 A0A4D8XQ43_SALSN | RV-SRAAQSPTHDLTDLSTLRSWLNFPWGLSMEHEIIYKAANTLQGYTKCEKPVPLFV--G | 290 |
| tr A0A0E0J2X9 A0A0E0J2X9_ORYNI | SI-SNATQTAKHDVMDWTCTRGWLNLPVGLTMEHEIIYKAANSVRS-----           | 299 |
| tr A0A5N5KUW8 A0A5N5KUW8_9ROSI | QV-SNAAQLPTHDLTDLSTLRSWVNFPGQTMEEYIIYKAANTIQQY--N-----        | 322 |
| tr I1Q300 I1Q300_ORYGL         | KI-SRACQIPTNDLTDLSTLRSWLNLPWARTMEYIIYKAVNSIYGYFK-----         | 350 |
| tr A0A0D3GHQ6 A0A0D3GHQ6_9ORYZ | KI-SRACQIPTNDLTDLSTLRSWLNLPWARTMEYIIYKAVNSIYGYFK-----         | 350 |
| tr A0A0E0AAS1 A0A0E0AAS1_9ORYZ | KI-SRACQIPTNDLTDLSTLRSWLNLPWARTMEYIIYKAVNSIYGYFK-----         | 350 |
| tr Q5Z9E4 Q5Z9E4_ORYSJ         | KI-SRACQIPTNDLTDLSTLRSWLNLPWARTMEYIIYKAVNSIYGYFK-----         | 350 |
| tr A0A0P0WY10 A0A0P0WY10_ORYSJ | KI-SRACQIPTNDLTDLSTLRSWLNLPWARTMEYIIYKAVNSIYGYFK-----         | 350 |
| tr A0A0E0PZ19 A0A0E0PZ19_ORYRU | KI-SRACQIPTNDLTDLSTLRSWLNLPWARTMEYIIYKAVNSIYGYFK-----         | 351 |
| tr A0A0E0PZ18 A0A0E0PZ18_ORYRU | KI-SRACQIPTNDLTDLSTLRSWLNLPWARTMEYIIYKAVNSIYGYFKAM-----       | 353 |
| tr A0A5J4Y9K4 A0A5J4Y9K4_9CHLO | TI-AQAVRPAIHVDVTDGSMRSWLNPLSSGLESIIYKATNIIINSFA-----          | 257 |
| tr A0A0D3GHQ7 A0A0D3GHQ7_9ORYZ | KI-SRACQIPTNDLTDLSTLRSWLNLPWARTMEYIIYKAVNSIYGYFKLLVRSVILE--S  | 360 |
| tr A0A0E0AAS2 A0A0E0AAS2_9ORYZ | KI-SRACQIPTNDLTDLSTLRSWLNLPWARTMEYIIYKAVNSIYGYFKLLVRSVILE--S  | 360 |
| tr B9FTQ4 B9FTQ4_ORYSJ         | KI-SRACQIPTNDLTDLSTLRSWLNLPWARTMEYIIYKAVNSIYGYFK-----         | 350 |
| tr A0A4S4EU20 A0A4S4EU20_CAMSI | QV-SRAAQLPNDVTDLSTLRSWANFPWAQSMEEYIIYKATNTIRGYN-D-----        | 479 |
| tr A0A7J7GVA1 A0A7J7GVA1_CAMSI | QV-SRAAQLPNDVTDLSTLRSWANFPWAQSMEEYIIYKATNTIRGYN-D-----        | 479 |
| tr A0A2R6Q5C5 A0A2R6Q5C5_ACTCC | TI-SNAMQAAKHDVMDWTCTSRGWMNLPVGLSMEYIIYKSSNTLRS-----           | 215 |
| tr A0A6J0ZNH9 A0A6J0ZNH9_9ROSI | TI-SNAVQVAKHDVMDWTCTRGWLNLPVGLSMEHEIIYKASNTLRS-----           | 254 |
| tr A0A1D1Y8J8 A0A1D1Y8J8_9ARAE | SI-SNSVQSAKHDVMDWTCTSRGWLNLPLGLSMEHEIIYKASNSLRS-----          | 278 |
| tr A0A6I9RV21 A0A6I9RV21_ELAGV | SI-SNAMQSAKHDVMDWTCTRGWLNLPVGLSMEHEIIYKAANTLRS-----           | 277 |
| tr A0A6P4DQY5 A0A6P4DQY5_ARADU | TI-SNAMQVAKHDVMDWTCTARGWLNLPVGLSMEHEIIYKASNTLKN-----          | 278 |
| tr A0A2R6QUJ3 A0A2R6QUJ3_ACTCC | TI-SNAMQAAKHDVMDWTCTSRGWMNLPVGLSMEYIIYKSSNTLRS-----           | 285 |
| tr A0A7J6GLE9 A0A7J6GLE9_CANSA | SV-SNAAQIAKHDVMDWTCTRGWLNLPVGLSMEHEIIYKASNTLRS-----           | 287 |
| tr A0A6G1FAM2 A0A6G1FAM2_9ORYZ | RI-SRASQPPTHVDLTDLSTLRSWLNFPYAHTMEYIIYKAANSLSYCK-----         | 336 |
| tr A0A6J0JU70 A0A6J0JU70_RAPSA | QV-SPAAQLPTHDLTDLSTLRSWVNFPGQSMEEYIIYKATNTIRGYI-S-----        | 301 |
| tr A0A4U5Q811 A0A4U5Q811_POPAL | QV-SNAAQLPTHDLTDLSTLRSWVNFPGQTMGYEIIYKAANTIQQY--N-----        | 321 |
| tr A0A6M2E6R0 A0A6M2E6R0_9ROSI | QV-SNAAQLPTHDLTDLSTLRSWVNFPGQTMGYEIIYKAANTIQQY--N-----        | 321 |
| tr A0A2K1YGU9 A0A2K1YGU9_POPTR | QV-SNAAQLPTHDLTDLSTLRSWVNFPGQTMGYEIIYKAANTIQQY--N-----        | 321 |

|                                |                                                               |     |
|--------------------------------|---------------------------------------------------------------|-----|
| tr A0A6G1FAM5 A0A6G1FAM5_9ORYZ | RI-SRASQPPTHDVTDLSTLRSWLNFPYAHTMEYEIYKAANSLNSYCK-----         | 336 |
| tr B8A231 B8A231_MAIZE         | RF-SRACQLPTQDLTDLSTLRSWINTPWAVRMEYEIYKAANSIHGYCK-----         | 343 |
| tr B6SKK2 B6SKK2_MAIZE         | RF-SRACQLPTQDLTDLSTLRSWINTPWAVRMEYEIYKAANSIHGYCK-----         | 343 |
| tr A0A5A7NW81 A0A5A7NW81_STRAF | RV-SRAAQVPTHDLTDLSTLRSWVNFPGQSMEMEYIYKATNTIRGYI-A-----        | 349 |
| tr A0A0E0HS99 A0A0E0HS99_ORYNI | KI-SHACQIPTNDLTDLSTLRSWLNLPWARTMEYEIYKAVNSIYGYFK-----         | 350 |
| tr A0A5J9TB85 A0A5J9TB85_9POAL | QL-SRACQLPTQDLTDLSTLRSWLNFPWATTMEYEIYKAANSIYGYCK-----         | 391 |
| tr A0A6J0JVV9 A0A6J0JVV9_RAPSA | QV-SPAAQLPTHDLTDLSTLRSWVNFPGQSMEMEYIYKATNTIRGYI-S-----        | 396 |
| tr A0A2G9HVA1 A0A2G9HVA1_9LAMI | QV-SRAAQVPTHDLTDLSTLRSWVNFPGQSMEMEYIYKATSTIRGY--A-----        | 415 |
| tr A0A1D6P215 A0A1D6P215_MAIZE | RF-SRACQLPTQDLTDLSTLRSWINTPWAVRMEYEIYKAANSIHGYCK-----         | 503 |
| tr A0A3L6DHQ6 A0A3L6DHQ6_MAIZE | RF-SRACQLPTQDLTDLSTLRSWINTPWAVRMEYEIYKAANSIHGYCK-----         | 503 |
| tr A0A444D484 A0A444D484_ENSVE | AV-SKPAGLQSHD-----DLARRLQEELNK-----                           | 109 |
| tr A0A6N2L9V1 A0A6N2L9V1_SALVM | TI-SNAMQVAKHDVVDWTCTRGWLNLPVGFSGMEHEVYKASNTLRS-----           | 259 |
| tr A0A5N5MEC2 A0A5N5MEC2_9ROSI | TI-SNAMQVAKHDVVDWTCTRGWLNLPVGFSGMEHEVYKASNTLRS-----           | 259 |
| tr A0A6M2ESH9 A0A6M2ESH9_9ROSI | TI-SNAMQVAKHDVVDWTCTRGWLNLPVGFSGMEHEVYKASNTLRS-----           | 257 |
| tr A9PHU1 A9PHU1_POPTR         | TI-SNAMQVAKHDVVDWTCTRGWLNLPVGFSGMEHEVYKASNTLRS-----           | 260 |
| tr A0A4V4H9B5 A0A4V4H9B5_MUSBA | SN-SNAVQSAKHDVTDWTCTMRGWLNLPGVLSMEYEIYKATNTLRS-----           | 276 |
| tr A0A5A7Q664 A0A5A7Q664_STRAF | TI-SNAVQVAKHDVMDWTCLRGWLNLPVGLSMEHEIYKASVTLRSYSRW-----        | 285 |
| tr A0A3L6S5C4 A0A3L6S5C4_PANMI | AA-NRP-IVHSHE-----DLAKKLQEAMDI-----                           | 449 |
| tr A0A0E0JXR6 A0A0E0JXR6_ORYPU | RI-SRASQPPTHDVTDLSTLRSWLNFPYAHTMEYEIYKAANSLNSYCK-----         | 316 |
| tr A0A6U9R6X8 A0A6U9R6X8_9CHLO | -NQQTITNKISHE-----ELTRKLQEDYDVKYAEAIKRETRKADFPRE-----         | 413 |
| tr A0A0D9VE44 A0A0D9VE44_9ORYZ | RI-SRASQPPTHDVTDLSTLRSWLNFPYAHTMEYEIYKAANSLNSYCK-----         | 336 |
| tr A0A444ZAW7 A0A444ZAW7_ARAHY | TI-SNAVQVAKHDVMDWTCTARGWLNLPVGLSMEHEIYKASNTLKN-----           | 292 |
| tr A0A0E0CIE1 A0A0E0CIE1_9ORYZ | RI-SRASQPPTHDVTDLSTLRSWLNFPYAHTMEYEIYKAANSLNSYCK-----         | 339 |
| tr A0A445EPD8 A0A445EPD8_ARAHY | TI-SNAMQVAKHDVMDWTCTARGWLNLPVGLSMEHEIYKASNTLKN-----           | 292 |
| tr A0A0D9YPP9 A0A0D9YPP9_9ORYZ | RI-SRASQPPTHDVTDLSTLRSWLNFPYAHTMEYEIYKAANSLNSYCK-----         | 340 |
| tr B8AEK2 B8AEK2_ORYSI         | RI-SRASQPPTHDVTDLSTLRSWLNFPYAHTMEYEIYKAANSLNSYCK-----         | 340 |
| tr A0A0E0G405 A0A0E0G405_ORYNI | RI-SRASQPPTHDVTDLSTLRSWLNFPYAHTMEYEIYKAANSLNSYCK-----         | 340 |
| tr A0A0E0NC57 A0A0E0NC57_ORYRU | RI-SRASQPPTHDVTDLSTLRSWLNFPYAHTMEYEIYKAANSLNSYCK-----         | 340 |
| tr A0A4U5QRQ4 A0A4U5QRQ4_POPAL | TI-SNAMQVAKHDVVDWTCTRGWLNLPVGLSMEHEVYKASNTLRS-----            | 258 |
| tr A0A068U4E6 A0A068U4E6_COFCA | TI-SNAVQVAKHDVMDWTCTMRGWLNLPGVLSMEHEIYKASNTLRN-----           | 377 |
| tr A0A175YLZ2 A0A175YLZ2_DAUCS | QI-SRAAQVPTHDLTDLSTLRSWLNFPWGQSMEMEYIYKATNTIRGY--N-----       | 481 |
| tr D7TC91 D7TC91_VITVI         | SI-SNAAQVAKHDVMDWTCTRGWLNLPVGLSMEHEIYKASNTLRS-----            | 279 |
| tr A0A2P5CYF8 A0A2P5CYF8_PARAD | SV-SNAMQVAKHDVMDWTCTRGWLNLPVGLSMEHEIYKASNTLRS-----            | 284 |
| tr A0A7J8V4X5 A0A7J8V4X5_9ROSI | TI-SNAVQVAKHDVMDWTCTRGWLNLPVGLSMEHEIYKASNTLRS-----            | 287 |
| tr A0A7J8S9U3 A0A7J8S9U3_GOSDV | TI-SNAVQVAKHDVMDWTCTRGWLNLPVGLSMEHEIYKASNTLRS-----            | 287 |
| tr A0A2K1WWT5 A0A2K1WWT5_POPTR | TI-SNAMQVAKHDVMDWTCTMRGWLNLPGVLSMEHEIYKASNTLRS-----           | 287 |
| tr A0A1U7ZHA9 A0A1U7ZHA9_NELNU | SV-SNAVQVAKHDVMDWTCTRGWLNLPVGLSMEHEIYKSSNTLRT-----            | 285 |
| tr A0A4U5Q985 A0A4U5Q985_POPAL | TI-SNAMQVAKHDVMDWTCTMRGWLNLPGVLSMEHEIYKASNTLRS-----           | 289 |
| tr A0A6J1H961 A0A6J1H961_CUCMO | GDKATCSAISLSSSST-----SIGSTKSGYT-----CQSAISNIPSTPCSN           | 151 |
| tr A0A2J6JPZ5 A0A2J6JPZ5_LACSA | QV-SRAAQVLPYDVTDLSTLRSWLNFPWGQSMEMEYIYKATNTIQGY--S-----       | 345 |
| tr B9F4F8 B9F4F8_ORYSJ         | RI-SRASQPPTHDVTDLSTLRSWLNFPYAHTMEYEIYKAANSLNSYCK-----         | 340 |
| tr Q6EUF2 Q6EUF2_ORYSJ         | RI-SRASQPPTHDVTDLSTLRSWLNFPYAHTMEYEIYKAANSLNSYCK-----         | 340 |
| tr A0A0P0VGT7 A0A0P0VGT7_ORYSJ | RI-SRASQPPTHDVTDLSTLRSWLNFPYAHTMEYEIYKAANSLNSYCK-----         | 340 |
| tr A0A4D8Z2T2 A0A4D8Z2T2_SALSN | RV-SRAAQSPTHDLTDLSTLRSWLNFPWGQSMEMEYIYKAANTLQGYT---KPVPLFV--S | 344 |
| tr A0A2U1LN57 A0A2U1LN57_ARTAN | HV-SRASQLPTHDLTDLSTLRSWLNFPWGQSMEMEYIYKATNTIQGY--S-----       | 257 |

|                                |                                                             |     |
|--------------------------------|-------------------------------------------------------------|-----|
| tr A0A397XXT3 A0A397XXT3_BRACM | QV-SPAAQLPTHDLTDLSTLRSWVNFPGQSMEEYIYKATNTIRGYI-S-----       | 394 |
| tr A0A5D2S5L7 A0A5D2S5L7_GOSMU | SI-SNAAQVAKHDVMDWTCTRGWLNLPVGLSMEHEIYKASTTLRS-----          | 289 |
| tr M4ERI0 M4ERI0_BRARP         | GYKNRSAGKSSILRFN--QSHRL-TFGFGFK-----                        | 114 |
| tr A0A5A7P127 A0A5A7P127_STRAF | -PPGRPAGLQSHE-----DLARKLQHILSHIVDLH-----EV-----             | 609 |
| tr A0A444ES18 A0A444ES18_ENSVE | SN-SNAVQVAKHDVTDWTCTMRGWLNLPLVGLCMEYIYKATNTLRS-----         | 276 |
| tr A0A6P5ZB34 A0A6P5ZB34_DURZI | SI-SNAVQVAKHDVMDWTCTGWLNLPVGLSMEHEIYKATNTLKS-----           | 261 |
| tr A0A067KCV5 A0A067KCV5_JATCU | TI-SNAVQVAKHDVMDWTCSRGLWLNLPVGLSMEHEIYKASNTLKS-----         | 264 |
| tr A0A5N5KU68 A0A5N5KU68_9ROSI | GHRNRAAKGSSRMTSQ--NEDEILNKILDNDGESSSSGQQFNTDLVSSIQRASSSASYS | 144 |
| tr A0A2I4GWR6 A0A2I4GWR6_JUGRE | TI-SNAVQVAKHDVIDWTCTRGWLNLPGLWSMEHEIYKASNTLRS-----          | 282 |
| tr A0A5J5B0G0 A0A5J5B0G0_9ASTE | TI-SNAVQVAKHDVMDWTCTRGWLNLPVGLLMEDEIYKSSNMLRS-----          | 282 |
| tr A0A067GEB1 A0A067GEB1_CITSI | TI-SNAVQVAKHDVMDWTCTRGWLNLPVGLSMEYIYKASNTLRS-----           | 261 |
| tr A0A2P5FH90 A0A2P5FH90_TREOI | SV-SNAMQVAKHDVMDWTCTRGWLNLPVGLSMEHEIYKASNTLRS-----          | 284 |
| tr A0A6P5ZC23 A0A6P5ZC23_DURZI | SI-SNAVQVAKHDVMDWTCTGWLNLPVGLSMEHEIYKATNTLKS-----           | 287 |
| tr A0A7J9HAJ7 A0A7J9HAJ7_9ROSI | TI-SNAVQVAKHDVMDWTCTRGWLNLPFGLSMEHEIYKASNTLRS-----          | 287 |
| tr A0A5D2UUD2 A0A5D2UUD2_GOSMU | TI-SNAVQVAKHDVMDWTCTRGWLNLPFGLSMEHEIYKASNTLRS-----          | 287 |
| tr A0A5D2Z4X4 A0A5D2Z4X4_GOSMU | TI-SNAVQVAKHDVMDWTCTRGWLNLPVGLSMEHEIYKASNTLTS-----          | 287 |
| tr A0A7J9A5M7 A0A7J9A5M7_9ROSI | TI-SNAVQVAKHDVMDWTCTRGWLNLPFGLSMEHEIYKASNTLRS-----          | 287 |
| tr A0A5D2CBR4 A0A5D2CBR4_GOSDA | TI-SNAVQVAKHDVMDWTCTRGWLNLPFGLSMEHEIYKASNTLRS-----          | 287 |
| tr A0A7J8MIP5 A0A7J8MIP5_9ROSI | TI-SNAVQVAKHDVMDWTCTRGWLNLPFGLSMEHEIYKASNTLRS-----          | 287 |
| tr A0A7J8XT08 A0A7J8XT08_GOSAI | TI-SNAVQVAKHDVMDWTCTRGWLNLPFGLSMEHEIYKASNTLRS-----          | 287 |
| tr A0A7J9M837 A0A7J9M837_GOSSC | TI-SNAVQVAKHDVMDWTCTRGWLNLPFGLSMEHEIYKASNTLRS-----          | 287 |
| tr A0A7J9EM10 A0A7J9EM10_9ROSI | TI-SNAVQVAKHDVMDWTCTRGWLNLPFGLSMEHEIYKASNTLRS-----          | 287 |
| tr A0A0D2TD84 A0A0D2TD84_GOSRA | TI-SNAVQVAKHDVMDWTCTRGWLNLPFGLSMEHEIYKASNTLRS-----          | 287 |
| tr A0A7J9JNL7 A0A7J9JNL7_9ROSI | TI-SNAVQVAKHDVMDWTCTRGWLNLPFGLSMEHEIYKASNTLRS-----          | 287 |
| tr A0A5D2KQW7 A0A5D2KQW7_GOSTO | TI-SNAVQVAKHDVMDWTCTRGWLNLPFGLSMEHEIYKASNTLRS-----          | 287 |
| tr A0A5D2QB35 A0A5D2QB35_GOSTO | TI-SNAVQVAKHDVMDWTCTRGWLNLPVGLSMEHEIYKASNTLRS-----          | 287 |
| tr A0A2P5W217 A0A2P5W217_GOSBA | TI-SNAVQVAKHDVMDWTCTRGWLNLPFGLSMEHEIYKASNTLRS-----          | 287 |
| tr A0A2P5WJU2 A0A2P5WJU2_GOSBA | TI-SNAVQVAKHDVMDWTCTRGWLNLPVGLSMEHEIYKASNTLRS-----          | 287 |
| tr A0A0B0MVA9 A0A0B0MVA9_GOSAR | TI-SNAVQVAKHDVMDWTCTRGWLNLPVGLSMEHEIYKASNTLRS-----          | 287 |
| tr A0A1R3IUY7 A0A1R3IUY7_9ROSI | TI-SNAVQVAKHDVMDWTCSRGLWLNLPVGLSMEHEIYKASNTLRS-----         | 288 |
| tr A0A1R3HA36 A0A1R3HA36_COCAP | TI-SNAVQVAKHDVMDWTCSRGLWLNLPVGLSMEHEIYKASNTLRS-----         | 288 |
| tr A0A151SSP4 A0A151SSP4_CAJCA | TI-SNAAQVAKHDVMDWTCTRGWINLPFGLSMEHEIYKASNTLRN-----          | 288 |
| tr I1LYB0 I1LYB0_SOYBN         | TI-SNAVQVAKHDVTDWTCTRGWINLPFGLSMEHEIYKASNTLRN-----          | 288 |
| tr A0A5D2WLD7 A0A5D2WLD7_GOSMU | SI-SNAAQVAKHDVMDWTCTRGWLNLPVGLSMEHEIYKASTTLRS-----          | 288 |
| tr A0A445HEB0 A0A445HEB0_GLYSO | TI-SNAVQVAKHDVTDWTCTRGWINLPFGLSMEHEIYKASNTLRN-----          | 288 |
| tr A0A5J5T6I5 A0A5J5T6I5_GOSBA | SI-SNAAQVAKHDVMDWTCTRGWLNLPVGLSMEHEIYKASTTLRS-----          | 288 |
| tr A0A0B0NT31 A0A0B0NT31_GOSAR | SI-SNAAQVAKHDVMDWTCTRGWLNLPVGLSMEHEIYKASTTLRS-----          | 288 |
| tr A0A5D2E253 A0A5D2E253_GOSDA | SI-SNAAQVAKHDVMDWTCTRGWLNLPVGLSMEHEIYKASTTLRS-----          | 288 |
| tr A0A7J9I4D0 A0A7J9I4D0_9ROSI | SI-SNAAQVAKHDVMDWTCTRGWLNLPVGLSMEHEIYKASTTLRS-----          | 289 |
| tr A0A7J8W2F5 A0A7J8W2F5_9ROSI | SI-SNAAQVAKHDVMDWTCTRGWLNLPVGLSMEHEIYKASTTLRS-----          | 289 |
| tr A0A7J8T5I6 A0A7J8T5I6_GOSDV | SI-SNAAQVAKHDVMDWTCTRGWLNLPVGLSMEHEIYKASTTLRS-----          | 289 |
| tr A0A7J9FFD9 A0A7J9FFD9_9ROSI | SI-SNAAQVAKHDVMDWTCTRGWLNLPVGLSMEHEIYKASTTLRS-----          | 289 |
| tr A0A7J9KCR1 A0A7J9KCR1_9ROSI | SI-SNAAQVAKHDVMDWTCTRGWLNLPVGLSMEHEIYKASTTLRS-----          | 289 |
| tr A0A7J9CVS4 A0A7J9CVS4_GOSGO | SI-SNAAQVAKHDVMDWTCTRGWLNLPVGLSMEHEIYKASTTLRS-----          | 289 |
| tr A0A1U8I6I8 A0A1U8I6I8_GOSHI | SI-SNAAQVAKHDVMDWTCTRGWLNLPVGLSMEHEIYKASTTLRS-----          | 289 |

|                                |                                                              |     |
|--------------------------------|--------------------------------------------------------------|-----|
| tr A0A5D2I0Z6 A0A5D2I0Z6_GOSTO | SI-SNAAQVAKHDVMDWTCTRGWLNLPVGLSMEHEIYKASTTLRS-----           | 289 |
| tr A0A5D2S8Z8 A0A5D2S8Z8_GOSMU | SI-SNAAQVAKHDVMDWTCTRGWLNLPVGLSMEHEIYKASTTLRS-----           | 289 |
| tr A0A0D2VIV8 A0A0D2VIV8_GOSRA | SI-SNAAQVAKHDVMDWTCTRGWLNLPVGLSMEHEIYKASTTLRS-----           | 289 |
| tr A0A5J5NQEO A0A5J5NQEO_GOSBA | SI-SNAAQVAKHDVMDWTCTRGWLNLPVGLSMEHEIYKASTTLRS-----           | 289 |
| tr A0A5D2A1Z1 A0A5D2A1Z1_GOSDA | SI-SNAAQVAKHDVMDWTCTRGWLNLPVGLSMEHEIYKASTTLRS-----           | 289 |
| tr J3LB56 J3LB56_ORYBR         | RI-SRASQPPTRDVTDLSTLRSWLNFPYAHTMEYEIYKAANSLNSYCK-----        | 295 |
| tr A0A426YGZ0 A0A426YGZ0_ENSVE | SN-SNCIQSAKHDVTDWTCMRGWLNLFPVGLSMEYEIYKATNILRS-----          | 276 |
| tr A0A7J7C9A8 A0A7J7C9A8_TRIWF | QV-SRAAQLPTHDLTDLSTLRSWLNFPWQGSMEYEIYKAANI IQGY--N-----      | 328 |
| tr A0A2P5YQD1 A0A2P5YQD1_GOSBA | SI-SNAAQVAKHDVMDWTCTRGWLNLPVGLSMEHEIYKASTTLRS-----           | 288 |
| tr R0I6U2 R0I6U2_9BRAS         | QV-SPAAQLPTHDLTDLSTLRSWVNFPWQGSMEYEIYKATNTIRGYI-T-----       | 303 |
| tr M4EU55 M4EU55_BRARP         | QV-SPAAQLPTHDLTDLSTLRSWVNFPWQGSMEYEIYKATNTIRGYI-S-----       | 393 |
| tr A0A022QHF4 A0A022QHF4_ERYGU | QV-SRAAQLPTHDLTDLSTLRSWVNFPWQGTMEYEIYKAVNTIHGY--A-----       | 409 |
| tr A0A6S7M578 A0A6S7M578_LACSI | QV-SRAAQLPTYDVTDLSTLRSWLNFPWQGSMEYEIYKATNTI QGY--S-----      | 428 |
| tr A0A078GNT4 A0A078GNT4_BRANA | QV-SPAAQLPTHDLTDLSTLRSWVNFPWQGSMEYEIYKATNTIRGYI-S-----       | 424 |
| tr A0A6N2AVW0 A0A6N2AVW0_SOLCI | QV-SRAAQLPTHDLTDLSTLRSWVNFPWQGSMEYEIYKAANTIRGY--E-----       | 498 |
| tr A0A6G1CWD1 A0A6G1CWD1_9ORYZ | KT-SRACQLPTNDLTDLSTLRSWLNLPWAGTMEYEIYKAVNSIYGYFK-----        | 345 |
| tr A0A7J9CJB5 A0A7J9CJB5_GOSGO | GHRSRAGRGSSKPAAK--DEDDILNQILGADIKESSSLRVASNNDMTPSVARANSSSSSS | 144 |
| tr A0A444G2C7 A0A444G2C7_ENSVE | SN-SNCIQSAKHDVTDWTCMRGWLNLFPVGLSMEYEIYKATNILRS-----          | 276 |
| tr A0A5N6QGY5 A0A5N6QGY5_9ROSI | TI-SNAMQVAKHDVMDWTCTRGWLNLPIGMSMEDEIYKASNTLKS-----           | 283 |
| tr W9RVR7 W9RVR7_9ROSA         | SV-SNAAQVAKHDVMDWTCTRGWLNLPVGLSMEHEIYKASNTLRT-----           | 285 |
| tr A0A5B7AS41 A0A5B7AS41_DAVIN | TI-SNAMQVAKHDVTDWTCRGWLNLPVGLLMEHEIYKSSNTLRS-----            | 283 |
| tr A0A7J9C8P3 A0A7J9C8P3_GOSGO | TI-SNAVQVAKHDVMDWTCTRGWLNLPVGLSMEHEIYKASNTLRS-----           | 287 |
| tr A0A1U7WIN6 A0A1U7WIN6_NICSY | TI-SNAVQAAKHDVMDWTCTRGWLNLPVGLSMEYEIYKSSNTLRT-----           | 281 |
| tr A0A1J6IC17 A0A1J6IC17_NICAT | TI-SNAVQAAKHDVMDWTCTRGWLNLPVGLSMEYEIYKSSNTLRT-----           | 281 |
| tr A0A1S4DM27 A0A1S4DM27_TOBAC | TI-SNAVQAAKHDVMDWTCTRGWLNLPVGLSMEYEIYKSSNTLRT-----           | 281 |
| tr A0A6A3B545 A0A6A3B545_HIBSY | SI-SNASQVAKHDVMDWTCTRGWLNLPVGLSMEHEIYKASNTLRS-----           | 290 |
| tr A0A7N2LTK1 A0A7N2LTK1_QUELO | SI-SNAVQVAKHDVIDWTCRGWLNLPVGLSMEHEIYKASNTLRS-----            | 292 |
| tr A0A2I0L5Z9 A0A2I0L5Z9_PUNGR | SI-SNAVQGAKHVDVVDWTCRGWLNLPVGLTMEHEIYKASNTLRS-----           | 283 |
| tr A0A1R3JEB1 A0A1R3JEB1_COCAP | GYKSRAGRGSLKSAK--DEDGMLNQILGADSKDSSSSGVASKNDKISSVQRAASSASGS  | 144 |
| tr A0A1S4AXM1 A0A1S4AXM1_TOBAC | TI-SNAVQAAKHDVMDWTCTRGWLNLPVGLSMEYEIYKSSNTLRT-----           | 290 |
| tr A0A3L6PF97 A0A3L6PF97_PANMI | AA-NRP-IVHSHE-----DLAKKLQEAMDI-----                          | 449 |
| tr D7KDX7 D7KDX7_ARALL         | QV-SPAAQLPTHDLTDLSTLRSWVNFPWQGSMEYEIYKATNTIRGYI-T-----       | 302 |
| tr A0A218XH43 A0A218XH43_PUNGR | SI-SNAVQGAKHVDVVDWTCRGWLNLPVGLTMEHEIYKASNTLRS-----           | 283 |
| tr A0A1S4AXX1 A0A1S4AXX1_TOBAC | TI-SNAVQAAKHDVMDWTCTRGWLNLPVGLSMEYEIYKSSNTLRT-----           | 312 |
| tr A0A5N6P4Z3 A0A5N6P4Z3_9ASTR | AAASRSSGLQSHE-----DLAKKLQNLGLM-----                          | 220 |
| tr V7BPT2 V7BPT2_PHAVU         | HV-SNAAQLPTHDLTDLSTLRSWVNFPWQGSMEYEIYKATNTIKAY--N-----       | 344 |
| tr A0A6G1CV26 A0A6G1CV26_9ORYZ | KT-SRACQLPTNDLTDLSTLRSWLNLPWAGTMEYEIYKAVNSIYGYFK-----        | 345 |
| tr A0A2S3HIS8 A0A2S3HIS8_9POAL | RF-SRACQLPTQDLTDLSTLRSWINIPWAIKMEYEIYKAANSIYGYCK-----        | 342 |
| tr A0A2T7DXM5 A0A2T7DXM5_9POAL | RF-SRACQLPTQDLTDLSTLRSWINIPWAIKMEYEIYKAANSIYGYCK-----        | 342 |
| tr A0A3L6PEE3 A0A3L6PEE3_PANMI | RF-SRACQLPTQDLTDLSTLRSWINIPWAIKMEYEIYKAANSICGYCK-----        | 361 |
| tr A0A1S4AY23 A0A1S4AY23_TOBAC | TI-SNAVQAAKHDVMDWTCTRGWLNLPVGLSMEYEIYKSSNTLRT-----           | 358 |
| tr A0A443PNH8 A0A443PNH8_9MAGN | SL-GKSAVQQSHE-----DLAKKLQEEMDR-----                          | 512 |
| tr A0A5E4E302 A0A5E4E302_PRUDU | NI-SNASQAAKHDVMDWTCTRGWLNLPVGFSSMEHEIYKASNTLRS-----          | 289 |
| tr A0A446PFI6 A0A446PFI6_TRITD | SV-SNATQTAKHDVMDWTSARGWLNLPVGLTLEHEIYKAAVSIRS-----           | 300 |
| tr A0A438E5E5 A0A438E5E5_VITVI | QV-SRAAQSPITYDLTDLSTLRSWLNFPWQGSMEYEIYKAANTIRNSF-S-----      | 157 |

|                                |                                                       |     |
|--------------------------------|-------------------------------------------------------|-----|
| tr A0A7J9AYN2 A0A7J9AYN2_9ROSI | SI-SNAAQVAKHDVMDWTCTRGWLNLPVGLSMEHEIYKASTTLRS-----    | 289 |
| tr A0A067G5B6 A0A067G5B6_CITSI | TI-SNAVQVAKHDVVDWTCTRGWLNLPVGLSMEYEIYKASNTLRS-----    | 261 |
| tr A0A6V7P3V7 A0A6V7P3V7_ANACO | SI-SNATQLAKHDVIDWTCARGWLNLPVGLSMDHEIYKAANTLRS-----    | 228 |
| tr A0A2K3L4T2 A0A2K3L4T2_TRIPR | TI-SNSVQAAKHDVMDWTCARGWLNLPVGLSMEHEIYKASNTLRN-----    | 292 |
| tr A0A5E4E497 A0A5E4E497_PRUDU | NI-SNASQAAKHDVMDWTCTRGWLNLPVGFSSMEHEIYKASNTLRS-----   | 289 |
| tr A0A1W0VTG3 A0A1W0VTG3_SORBI | RF-SRACQLPTQDLTDLSTLRSWINIPWAVRMEYEIYKAANSIHGYCG----- | 342 |
| tr A0A5K0Z6Z6 A0A5K0Z6Z6_9MAGN | KV-SHASQLATHDLTDLSTLRSWVNFPWQGSMEYEIYKATNTIRGYCK----- | 301 |
| tr A0A0A0LWS3 A0A0A0LWS3_CUCSA | SI-SNAVQRAKHDVMDWTCARGWLNLPVGLSMEHEIYKASQTLRG-----    | 274 |
| tr A0A1D6HX11 A0A1D6HX11_MAIZE | SV-SNASQTAKHDVMDWTCARGWLNFPVGLTMEHEIYKAANTLTS-----    | 300 |
| tr A0A2H3XIR1 A0A2H3XIR1_PHODC | SN-SNAMQSAKHDVMDWTSTRGWLNLPVGLSMEHEIYKAANTLRS-----    | 277 |
| tr A0A6P5GTM1 A0A6P5GTM1_ANACO | SI-SNATQLAKHDVIDWTCARGWLNLPVGLSMDHEIYKAANTLRS-----    | 278 |
| tr A0A199VRL4 A0A199VRL4_ANACO | SI-SNATQLAKHDVIDWTCARGWLNLPVGLSMDHEIYKAANTLRS-----    | 278 |
| tr A0A022QAU6 A0A022QAU6_ERYGU | TI-SNAAQVAKHDVMDWTCARGWLNLPVGLSLEHEIYKSCNTLRS-----    | 281 |
| tr A0A371GJB6 A0A371GJB6_MUCPR | TI-SNAAQVAKHDVMDWTCARGWINLPVGLSMEHEIYKASNTLRN-----    | 288 |
| tr A0A251IZI6 A0A251IZI6_MANES | TI-SNAVQAAKHDVMDWTCTRGWLNLPVGLSMEHEIYKASNTLRS-----    | 285 |
| tr A0A7J7HWK5 A0A7J7HWK5_CAMSI | TI-SNAVQVAKHDVMDWTSMRGWLNLPVGLSMEYEIYKSSNTLRS-----    | 285 |
| tr A0A5C7GVA1 A0A5C7GVA1_9ROSI | SI-SNAVQVAKHDVVDWTCTRGWLNLPVGLSMEYEIYKASNTLRS-----    | 287 |
| tr A0A1S2YPT9 A0A1S2YPT9_CICAR | TI-SNAVQVAKHDVMDWTSARGWLNLPVGLSMEHEIYKASNTLQN-----    | 288 |
| tr A0A5N5I234 A0A5N5I234_9ROSA | SI-SNAAQAAKHDVMDWTCTRGWLNLPVGFSSMEQEYIYKASNTLRS-----  | 289 |
| tr A0A7J9AWW0 A0A7J9AWW0_9ROSI | SI-SNAAQVAKHDVMDWTCTRGWLNLPVGLSMEHEIYKASTTLRS-----    | 289 |
| tr A0A7J8NBC7 A0A7J8NBC7_9ROSI | SI-SNAAQVAKHDVMDWTCTRGWLNLPVGLSMEHEIYKASTTLRS-----    | 289 |
| tr A0A7J8YJZ0 A0A7J8YJZ0_GOSAI | SI-SNAAQVAKHDVMDWTCTRGWLNLPVGLSMEHEIYKASTTLRS-----    | 289 |
| tr A0A7J9MU50 A0A7J9MU50_GOSSC | SI-SNAAQVAKHDVMDWTCTRGWLNLPVGLSMEHEIYKASTTLRS-----    | 289 |
| tr A0A5E4E3G6 A0A5E4E3G6_PRUDU | NI-SNASQAAKHDVMDWTCTRGWLNLPVGFSSMEHEIYKASNTLRS-----   | 289 |
| tr A0A4U6V1J0 A0A4U6V1J0_SETVI | RF-SRACQFPTQDLTDLSTLRSWINIPWATKMEYEIYKAANSIYGYCK----- | 346 |
| tr A0A3B6EB49 A0A3B6EB49_WHEAT | SV-SNATQTAKHDVMDWTSARGWLNLPVGLTLEHEIYKAAASLRS-----    | 298 |
| tr A0A453E2E6 A0A453E2E6_AEGTS | SV-SNATQTAKHDVMDWTSARGWLNLPVGLTLEHEIYKAAVSLRS-----    | 300 |
| tr A3BIJ2 A3BIJ2_ORYSJ         | SI-SNATQTAKHDVMDWTSTRGWLNLPVGLTMEHEIYKAANSVRS-----    | 299 |
| tr A2YK60 A2YK60_ORYSI         | SI-SNATQTAKHDVMDWTSTRGWLNLPVGLTMEHEIYKAANSVRS-----    | 299 |
| tr A0A0E0LJ79 A0A0E0LJ79_ORYPU | SI-SNATQTAKHDVMDWTSTRGWLNLPVGLTMEHEIYKAANSVRS-----    | 299 |
| tr A0A2S3GXE8 A0A2S3GXE8_9POAL | SV-SNASQTAKHDVMDWTCARGWLNLPVGLTMEHEIYKAANTLMS-----    | 300 |
| tr A0A3B6FGI8 A0A3B6FGI8_WHEAT | SV-SNATQTAKHDVMDWTSARGWLNLPVGLTLEHEIYKAAVSIRS-----    | 300 |
| tr A0A3B6GNS6 A0A3B6GNS6_WHEAT | SV-SNATQTAKHDVMDWTSARGWLNLPVGLTLEHEIYKAAVSLRS-----    | 300 |
| tr C5X3I0 C5X3I0_SORBI         | SV-SNASQTAKHDVMDWTCARGWLNLPVGLTMEHEIYKAANTLSS-----    | 300 |
| tr A0A2T7EN04 A0A2T7EN04_9POAL | SV-SNASQTAKHDVMDWTCARGWLNLPVGLTMEHEIYKAANTLMS-----    | 300 |
| tr A0A453E2Q5 A0A453E2Q5_AEGTS | SV-SNATQTAKHDVMDWTSARGWLNLPVGLTLEHEIYKAAVSLRS-----    | 300 |
| tr M8BMH1 M8BMH1_AEGTA         | SV-SNATQTAKHDVMDWTSARGWLNLPVGLTLEHEIYKAAVSLRS-----    | 300 |
| tr A0A0E0AHZ8 A0A0E0AHZ8_9ORYZ | SI-SNATQTAKHDVMDWTSTRGWLNLPVGLTMEHEIYKAANSVRS-----    | 301 |
| tr A0A0E0EA20 A0A0E0EA20_9ORYZ | SI-SNATQTAKHDVMDWTSARGWLNLPVGLTMEHEIYKAANSVRS-----    | 301 |
| tr A0A0E0Q6I8 A0A0E0Q6I8_ORYRU | SI-SNATQTAKHDVMDWTSTRGWLNLPVGLTMEHEIYKAANSVRS-----    | 301 |
| tr I1Q9P1 I1Q9P1_ORYGL         | SI-SNATQTAKHDVMDWTSTRGWLNLPVGLTMEHEIYKAANSVRS-----    | 301 |
| tr A0A0P0X4Z1 A0A0P0X4Z1_ORYSJ | SI-SNATQTAKHDVMDWTSTRGWLNLPVGLTMEHEIYKAANSVRS-----    | 301 |
| tr Q6Z4J7 Q6Z4J7_ORYSJ         | SI-SNATQTAKHDVMDWTSTRGWLNLPVGLTMEHEIYKAANSVRS-----    | 301 |
| tr A0A0D3GPH8 A0A0D3GPH8_9ORYZ | SI-SNATQTAKHDVMDWTSTRGWLNLPVGLTMEHEIYKAANSVRS-----    | 301 |
| tr A0A5J9VT31 A0A5J9VT31_9POAL | SV-SNASQTAKHDVMDWTCARGWLNLPVGLTMEHEIYKAANSRLRI-----   | 302 |

|                                |                                                      |     |
|--------------------------------|------------------------------------------------------|-----|
| tr A0A5J9VVN9 A0A5J9VVN9_9POAL | SV-SNASQTAKHDVMDWTC SRGWLNLPIGLTMEHEIYKAANSLRI-----  | 302 |
| tr A0A2S3HG76 A0A2S3HG76_9POAL | AA-NRP-IVHSHE-----DLAKKLQEAMDI-----                  | 443 |
| tr A0A2T7DU10 A0A2T7DU10_9POAL | AA-NRP-IVHSHE-----DLAKKLQEAMDI-----                  | 445 |
| tr T1L7X1 T1L7X1_TRIUA         | SV-SNATQTAKHDVMDWTSARGWLNLPIGLTLEHEIYKAAVSLRS-----   | 298 |
| tr A0A446N5P4 A0A446N5P4_TRITD | SV-SNATQTAKHDVMDWTSARGWLNLPIGLTLEHEIYKAAASLRS-----   | 298 |
| tr I1GY35 I1GY35_BRADI         | KI-SRACQLPTKDLTDLSTLRWINIPWAHTMEYEIYKAANSIHGYCK----- | 332 |
| tr A0A0R0FGY4 A0A0R0FGY4_SOYBN | TI-SNAAQGAKHDVMDWTCARGWINLPIGLSMEHEIYKASNTLRN-----   | 288 |

## **Nonhuman mammals**

|                                |                            |     |
|--------------------------------|----------------------------|-----|
| sp Q9H8W4 PKHF2_HUMAN          | -----NDMSDDDDDDDS--SD----- | 249 |
| tr G3RXJ3 G3RXJ3_GORGO         | -----NDMSDDDDDDDS--SD----- | 249 |
| tr A0A2R8ZRE3 A0A2R8ZRE3_PANPA | -----NDMSDDDDDDDS--SD----- | 249 |
| tr A0A6D2WS13 A0A6D2WS13_PANTR | -----NDMSDDDDDDDS--SD----- | 249 |
| tr H2QWG2 H2QWG2_PANTR         | -----NDMSDDDDDDDS--SD----- | 249 |
| tr A0A2K6B0W2 A0A2K6B0W2_MACNE | -----NDMSDDDDDDDS--SD----- | 249 |
| tr A0A2K6JSQ3 A0A2K6JSQ3_RHIBE | -----NDMSDDDDDDDS--SD----- | 249 |
| tr A0A2K5UMP8 A0A2K5UMP8_MACFA | -----NDMSDDDDDDDS--SD----- | 249 |
| tr G7PC92 G7PC92_MACFA         | -----NDMSDDDDDDDS--SD----- | 249 |
| tr A0A2I3GPW4 A0A2I3GPW4_NOMLE | -----NDMSDDDDDDDS--SD----- | 249 |
| tr A0A2K5XAN3 A0A2K5XAN3_MANLE | -----NDMSDDDDDDDS--SD----- | 249 |
| tr A0A2K5KIW2 A0A2K5KIW2_CERAT | -----NDMSDDDDDDDS--SD----- | 249 |
| tr A0A2J8UGL7 A0A2J8UGL7_PONAB | -----NDMSDDDDDDDS--SD----- | 249 |
| tr G7MZT0 G7MZT0_MACMU         | -----NDMSDDDDDDDS--SD----- | 249 |
| tr A0A2K5PKC3 A0A2K5PKC3_CEBIM | -----NDMSDDDDDDDS--SD----- | 249 |
| tr A0A2K6NLA2 A0A2K6NLA2_RHIRO | -----NDMSDDDDDDDS--SD----- | 249 |
| tr F7ASZ1 F7ASZ1_MACMU         | -----NDMSDDDDDDDS--SD----- | 249 |
| tr A0A6J3FGX3 A0A6J3FGX3_SAPAP | -----NDMSDDDDDDDS--SD----- | 249 |
| tr A0A6D2X014 A0A6D2X014_PONAB | -----NDMSDDDDDDDS--SD----- | 249 |
| tr A0A6I9ICZ8 A0A6I9ICZ8_VICPA | -----NDVSDDDDDDDS--SD----- | 249 |
| tr S9WGC9 S9WGC9_CAMFR         | -----NDVSDDDDDDDS--SD----- | 249 |
| tr A0A5N4CHZ2 A0A5N4CHZ2_CAMDR | -----NDVSDDDDDDDS--SD----- | 249 |
| tr A0A2K5HBE8 A0A2K5HBE8_COLAP | -----NDMSDDDDDDDS--SD----- | 249 |
| tr A0A2K5C657 A0A2K5C657_AOTNA | -----NDMSDDDDDDDS--SD----- | 249 |
| tr A0A096MLM1 A0A096MLM1_PAPAN | -----NDMSDDDDDDDS--SD----- | 249 |
| tr F7FEC3 F7FEC3_CALJA         | -----NDMSDDDEDDDS--SD----- | 249 |
| tr A0A0D9SB87 A0A0D9SB87_CHLSB | -----NDMSDDDDDDDS--SD----- | 249 |
| tr A0A2K6S793 A0A2K6S793_SAIBB | -----NDMSDDDDDDDS--SD----- | 249 |
| tr A0A3Q7TWS2 A0A3Q7TWS2_VULVU | -----NDVSDDDDDDDS--SD----- | 249 |
| tr A0A1S3AB18 A0A1S3AB18_ERIEU | -----NDVSDDDDDDDS--SD----- | 249 |
| tr A0A5E4BFX5 A0A5E4BFX5_MARMO | -----NDVSDDDDDDDS--SD----- | 249 |
| tr I3MAC4 I3MAC4_ICTTR         | -----NDVSDDDDDDDS--SD----- | 249 |
| tr A0A1U7T0A4 A0A1U7T0A4_CARSF | -----NDVSDDDDDDDS--SD----- | 249 |
| tr A0A2K6ERG1 A0A2K6ERG1_PROCO | -----NDVSDDDDDDDS--SD----- | 249 |

|                                |                            |     |
|--------------------------------|----------------------------|-----|
| tr A0A6I9JB2 A0A6I9JB2_CHRAS   | -----NDVSDDDDDDDS--SD----- | 249 |
| tr A0A3Q7P8U5 A0A3Q7P8U5_CALUR | -----NDVSDDDDDDDS--SD----- | 249 |
| tr A0A3P4LK23 A0A3P4LK23_GULGU | -----NDVSDDDDDDDS--SD----- | 249 |
| tr M3Z4K3 M3Z4K3_MUSPF         | -----NDVSDDDDDDDS--SD----- | 249 |
| tr A0A485MJJ6 A0A485MJJ6_LYNPA | -----NDVSDDDDDDDS--SD----- | 249 |
| tr A0A667IBC1 A0A667IBC1_LYNCA | -----NDVSDDDDDDDS--SD----- | 249 |
| tr A0A4X1U327 A0A4X1U327_PIG   | -----NDVSDDDDDDDS--SD----- | 249 |
| tr U6CRZ6 U6CRZ6_NEOVI         | -----NDVSDDDDDDDS--SD----- | 249 |
| tr A0A2Y9EYL3 A0A2Y9EYL3_PHYMC | -----NDVSDDDDDDDS--SD----- | 249 |
| tr M3WVQ3 M3WVQ3_FELCA         | -----NDVSDDDDDDDS--SD----- | 249 |
| tr A0A7J8DUD9 A0A7J8DUD9_MOLMO | -----NDVSDDDDDDDS--SD----- | 249 |
| tr A0A6P6HRR1 A0A6P6HRR1_PUMCO | -----NDVSDDDDDDDS--SD----- | 249 |
| tr A0A287ASA9 A0A287ASA9_PIG   | -----NDVSDDDDDDDS--SD----- | 249 |
| tr A0A6J1ZRF1 A0A6J1ZRF1_ACIB  | -----NDVSDDDDDDDS--SD----- | 249 |
| tr A0A6P4WVG5 A0A6P4WVG5_PANPR | -----NDVSDDDDDDDS--SD----- | 249 |
| tr A0A5N3XBU7 A0A5N3XBU7_MUNRE | -----NDVSDDDDDDDS--SD----- | 249 |
| tr A0A5N3WEU8 A0A5N3WEU8_MUNMU | -----NDVSDDDDDDDS--SD----- | 249 |
| tr L8ILX8 L8ILX8_9CETA         | -----NDVSDDDDDDDS--SD----- | 249 |
| tr A4IFN8 A4IFN8_BOVIN         | -----NDVSDDDDDDDS--SD----- | 249 |
| tr A0A4W2EB56 A0A4W2EB56_BOBOX | -----NDVSDDDDDDDS--SD----- | 249 |
| tr A0A6P5CTL6 A0A6P5CTL6_BOSIN | -----NDVSDDDDDDDS--SD----- | 249 |
| tr A0A6J0WJ70 A0A6J0WJ70_ODOVR | -----NDVSDDDDDDDS--SD----- | 249 |
| tr A0A6P3GQJ4 A0A6P3GQJ4_BISBI | -----NDVSDDDDDDDS--SD----- | 249 |
| tr A0A2U3WPC7 A0A2U3WPC7_ODORO | -----NDVSDDDDDDDS--SD----- | 249 |
| tr A0A7J7VF05 A0A7J7VF05_RHIFE | -----NDVSDDDDDDDS--SD----- | 249 |
| tr L5KAU6 L5KAU6_PTEAL         | -----NDVSDDDDDDDS--SD----- | 249 |
| tr A0A6P3QVM8 A0A6P3QVM8_PTEVA | -----NDVSDDDDDDDS--SD----- | 249 |
| tr A0A2Y9PAZ8 A0A2Y9PAZ8_DELLE | -----NDVSDDDDDDDS--SD----- | 249 |
| tr G1PK15 G1PK15_MYOLU         | -----NDVSDDDDDDDS--SD----- | 249 |
| tr A0A7J7TK50 A0A7J7TK50_MYOMY | -----NDVSDDDDDDDS--SD----- | 249 |
| tr A0A2Y9GX76 A0A2Y9GX76_NEOSC | -----NDVSDDDDDDDS--SD----- | 249 |
| tr L5MHS6 L5MHS6_MYODS         | -----NDVSDDDDDDDS--SD----- | 249 |
| tr A0A2U3XES2 A0A2U3XES2_LEPWE | -----NDVSDDDDDDDS--SD----- | 249 |
| tr A0A7J7VN67 A0A7J7VN67_PIPKU | -----NDVSDDDDDDDS--SD----- | 249 |
| tr A0A452QFV9 A0A452QFV9_URSAM | -----NDVSDDDDDDDS--SD----- | 249 |
| tr A0A6G1APQ5 A0A6G1APQ5_CROCR | -----NDVSDDDDDDDS--SD----- | 249 |
| tr A0A340WBB4 A0A340WBB4_LIPVE | -----NDVSDDDDDDDS--SD----- | 249 |
| tr A0A3Q7WAC4 A0A3Q7WAC4_URSAR | -----NDVSDDDDDDDS--SD----- | 249 |
| tr A0A250XXA1 A0A250XXA1_CASCN | -----NDVSDDDDDDDS--SD----- | 249 |
| tr G9KH59 G9KH59_MUSPF         | -----NDVSDDDDDDDS--S-----  | 248 |
| tr A0A1U7QHL5 A0A1U7QHL5_MESAU | -----NDVSDDDDDDDS--SD----- | 249 |
| tr A0A452CBQ1 A0A452CBQ1_BALAS | -----NDVSDDDDDDDS--SD----- | 249 |
| tr A0A2Y9QET1 A0A2Y9QET1_TRIMA | -----NDVSDDDDDDDS--SD----- | 249 |
| tr A0A6P5PKF8 A0A6P5PKF8_MUSCR | -----NDASDDDDDDDS--SD----- | 249 |
| tr A0A341CEL5 A0A341CEL5_NEOAA | -----NDVSDDDDDDDS--SD----- | 249 |



|                                |                                                              |     |
|--------------------------------|--------------------------------------------------------------|-----|
| tr A0A484GRA3 A0A484GRA3_SOUCH | -----NDVSDDDDDDDS--SD-----                                   | 249 |
| tr A0A7J8C3Q9 A0A7J8C3Q9_ROUAE | -----NDVSDDDDDDDS--SD-----                                   | 249 |
| tr A0A384BXS8 A0A384BXS8_URSMA | -----NDVSDDDDDDDS--SD-----                                   | 249 |
| tr A0A2U4AI60 A0A2U4AI60_TURTR | -----NDVSDDDDDDDS--SD-----                                   | 249 |
| tr A0A2Y9J9Y4 A0A2Y9J9Y4_ENHLU | -----NDVSDDDDDDDS--SD-----                                   | 249 |
| tr L8YGB7 L8YGB7_TUPCH         | -----NDVSDDDDDDDS--SD-----                                   | 250 |
| tr G3UCQ4 G3UCQ4_LOXAF         | -----NDVSDDDDDDDS--SD-----                                   | 249 |
| tr D2HVB5 D2HVB5_AILME         | -----NDVSDDDDDDDS--SD-----                                   | 249 |
| tr A0A6I9L8U8 A0A6I9L8U8_PERMB | -----NDVSDDDDDDDS--SD-----                                   | 249 |
| tr A0A1S3EVN9 A0A1S3EVN9_DIPOR | -----NDGSDDDDDDDS--SD-----                                   | 249 |
| tr A0A2K5C233 A0A2K5C233_AOTNA | -----NDMSDDDDDDDS--SD-----                                   | 249 |
| tr H0Y0B3 H0Y0B3_OTOGA         | -----NDVSDDDDDDDS--SD-----                                   | 249 |
| tr A0A6J2NCI4 A0A6J2NCI4_9CHIR | -----NDVSDDDDDDDS--SD-----                                   | 249 |
| sp Q91WB4 PKHF2_MOUSE          | -----NDASDDDDDDDS--SD-----                                   | 249 |
| tr A0A7J7EHJ9 A0A7J7EHJ9_DICBM | -----NDVSDDDDDDDS--SD-----                                   | 249 |
| tr K9IHW6 K9IHW6_DESRO         | -----NDVSDDDDDDDS--SD-----                                   | 249 |
| tr A0A452DYL3 A0A452DYL3_CAPHI | -----NDVSDDDDDDDS--SD-----                                   | 249 |
| tr A0A3Q2HWW6 A0A3Q2HWW6_HORSE | -----NDVSDDDDDDDS--SD-----                                   | 249 |
| tr W5PZ70 W5PZ70_SHEEP         | -----NDVSDDDDDDDS--SD-----                                   | 249 |
| tr A0A6P7ECY0 A0A6P7ECY0_SHEEP | -----NDVSDDDDDDDS--SD-----                                   | 249 |
| tr B1WBV4 B1WBV4_RAT           | -----NDASDDDDDDDS--SD-----                                   | 249 |
| tr A0A6J2F8G3 A0A6J2F8G3_ZALCA | -----NDVSDDDDDDDS--SD-----                                   | 248 |
| tr A0A7N4NQ24 A0A7N4NQ24_SARHA | -----NNVSDEDEDDDS--SD-----                                   | 249 |
| tr A0A6P5IQU3 A0A6P5IQU3_PHACI | -----NNVSDEDEDDDS--SD-----                                   | 249 |
| tr A0A286XYJ1 A0A286XYJ1_CAVPO | -----NNVSDDDDDDDS--D-----                                    | 248 |
| tr A0A5E4BEY9 A0A5E4BEY9_MARMO | -----NDVLDDDDDDDS--SD-----                                   | 249 |
| tr A0A091DW22 A0A091DW22_FUKDA | -----NDVSDEDEDDDS--D-----                                    | 248 |
| tr A0A0P6K1S8 A0A0P6K1S8_HETGA | -----NNVSDEDEDDDS--D-----                                    | 248 |
| tr F7A285 F7A285_ORNAN         | -----NNTSDDDDDDDS--SD-----                                   | 249 |
| tr F6Q9Z2 F6Q9Z2_MONDO         | -----NNVSDEDE--DEDSS--D-----                                 | 543 |
| tr A0A6P3FWN8 A0A6P3FWN8_OCTDE | -----NDVSDDDEEDDS--D-----                                    | 248 |
| tr A0A6A1QJM0 A0A6A1QJM0_BALPH | -----NDVSDDDDDDDD--DDDD--SSD-----                            | 255 |
| tr A0A673V5I4 A0A673V5I4_SURSU | -----NQHYLKKTMTKTE--KC-----                                  | 249 |
| tr A0A6J0YZI7 A0A6J0YZI7_ODOVR | -----                                                        | 229 |
| tr F7F262 F7F262_MONDO         | -----CSTL-SYW---LQ-----                                      | 238 |
| tr A0A5F8H7A3 A0A5F8H7A3_MONDO | -----CQSK-G----RDVRTASPGTGS--QVQSA-----DSFPV-----            | 259 |
| tr A0A5F8GYD7 A0A5F8GYD7_MONDO | ISILAILAAI-SYL---FPPGTHTPHSGS--SE-----                       | 264 |
| tr A8Y5N8 A8Y5N8_MOUSE         | -----                                                        | 197 |
| tr A0A5N3XKB2 A0A5N3XKB2_MUNRE | -----NDVSDDDD--DDSSD-----                                    | 213 |
| tr A0A1A6FXD9 A0A1A6FXD9_NEOLE | -----NDVSDDDD--DDDSS--D-----                                 | 227 |
| tr A0A6B0RRU8 A0A6B0RRU8_9CETA | -----NDVSDDDD--DDDSS--D-----                                 | 465 |
| tr A0A5N3UY12 A0A5N3UY12_MUNMU | -----NDVSDDDD--DDDD--SSD-----                                | 204 |
| tr A0A0D9SB08 A0A0D9SB08_CHLSB | HLTGPICGASSG---DDDDSDDEDKEGSRD--GDWPSRVEFY--GSGVAWSAFHS----- | 279 |
| tr A0A2J8KSM2 A0A2J8KSM2_PANTR | HLAGPICGASSG---DDDDSDDEDKEGSRD--GDWPSRVEFY--ASGVAWSAFHS----- | 279 |
| sp Q96S99 PKHF1_HUMAN          | HLARPICGASSG---DDDDSDDEDKEGSRD--GDWPSSVEFY--ASGVAWSAFHS----- | 279 |

|                                |                                                               |     |
|--------------------------------|---------------------------------------------------------------|-----|
| tr A0A2K5JGW8 A0A2K5JGW8_COLAP | HLTRPICGASSG---DDDDSDDEDKEGSRD--GDWPSRVEFY--GSGVAWSAFHS-----  | 279 |
| tr A0A2K6CYZ9 A0A2K6CYZ9_MACNE | HLTRPICGASSG---DDDDSDDEDKEGSRD--GDWPSRVEFY--GSGVAWSAFHS-----  | 279 |
| tr A0A2K6JWD4 A0A2K6JWD4_RHIBE | HLTRPICGASSG---DDDDSDDEDKEGSRD--GDWPSRVEFY--GSGVAWSAFHS-----  | 279 |
| tr A0A2K5UDM0 A0A2K5UDM0_MACFA | HLTRPICGASSG---DDDDSDDEDKEGSRD--GDWPSHVEFY--GSGVAWSAFHS-----  | 279 |
| tr G3QH50 G3QH50_GORGO         | HLTRPICGASSG---DDDDSDDEDKEGSRD--GDWPSRVEFY--ASGVAWSAFHS-----  | 279 |
| tr A0A2I3G625 A0A2I3G625_NOMLE | HLTRPICGASSG---DDDDSDDEDKEGSRD--GDWPSRVEFY--ASGVAWSAFHS-----  | 279 |
| tr A0A2K5XLS1 A0A2K5XLS1_MANLE | HLTRPICGASSG---DDDDSDDEDKEGSRD--GDWPSRVEFY--GSGVAWSAFHS-----  | 279 |
| tr A0A0A0MVG7 A0A0A0MVG7_PAPAN | HLTRPICGASSG---DDDDSDDEDKEGSRD--GDWPSRVEFY--GSGVAWSAFHS-----  | 279 |
| tr A0A2K5KX81 A0A2K5KX81_CERAT | HLTRPICGASSG---DDDDSDDEDKEGSRD--GDWPSRVEFY--GSGVAWSAFHS-----  | 279 |
| tr G7NLE7 G7NLE7_MACMU         | HLTRPICGASSG---DDDDSDDEDKEGSRD--GDWPSRVEFY--GSGVAWSAFHS-----  | 279 |
| tr A0A2K6NPM4 A0A2K6NPM4_RHIRO | HLTRPICGASSG---DDDDSDDEDKEGSRD--GDWPSRVEFY--GSGVAWSAFHS-----  | 279 |
| tr F6WEV7 F6WEV7_MACMU         | HLTRPICGASSG---DDDDSDDEDKEGSRD--GDWPSRVEFY--GSGVAWSAFHS-----  | 279 |
| tr H2QFY5 H2QFY5_PANTR         | HLTRPICGASSG---DDDDSDDEDKEGSRD--GDWPSRVEFY--ASGVAWSAFHS-----  | 279 |
| tr A0A2J8SAC5 A0A2J8SAC5_PONAB | HLTRPICGASSG---DDDDSDDEDKEGSRD--GDWPSRVEFY--ASGVAWSAFHS-----  | 279 |
| tr A0A6D2Y8X4 A0A6D2Y8X4_PONAB | HLTRPICGASSG---DDDDSDDEDKEGSRD--GDWPSRVEFY--ASGVAWSAFHS-----  | 279 |
| tr G7PX49 G7PX49_MACFA         | HLTRPICGASSG---DDDDSDDEDKEGSRD--GDWPSRVEFY--GSGVAWSAFHS-----  | 279 |
| tr A0A2R9AA53 A0A2R9AA53_PANPA | HLAGPICGASSG---DDDDSDDEDKEGSRD--GDWPSRVEFY--ASGVAWSAFHS-----  | 364 |
| tr B4DWN9 B4DWN9_HUMAN         | HLTRPICGASSG---DDDDSDDEDKEGSRD--GDWPSSVEFY--ASGVAWSAFHS-----  | 364 |
| tr L8IB21 L8IB21_9CETA         | HLAGAVCGASSG---DDDDSDDEDREGSGD--GDWPSHVEFY--ASGVSWSSFHS-----  | 279 |
| tr A2VE19 A2VE19_BOVIN         | HLAGAVCGASSG---DDDDSDDEDREGSGD--GDWPSHVEFY--ASGVSWSSFHS-----  | 279 |
| tr A0A4W2H1W7 A0A4W2H1W7_BOBOX | HLAGAVCGASSG---DDDDSDDEDREGSGD--GDWPSHVEFY--ASGVSWSSFHS-----  | 279 |
| tr A0A6P5DDG5 A0A6P5DDG5_BOSIN | HLAGAVCGASSG---DDDDSDDEDREGSGD--GDWPSHVEFY--ASGVSWSSFHS-----  | 279 |
| tr A0A091D210 A0A091D210_FUKDA | HLGGAIFYGASSGDDGDDDDSDDEDKEGSRD--GDWPSRVQFY--ASGVSWSAFHS----- | 282 |
| tr A0A6B0R7Q5 A0A6B0R7Q5_9CETA | HLAGAVCGASSG---DDDDSDDEDREGSGD--GDWPSHVEFY--ASGVSWSSFHS-----  | 298 |
| tr A0A2K5PK00 A0A2K5PK00_CEBIM | HLTRPICGASSG---DDDDSDDEDKEGSGD--GDWSSRVEFY--SSGVAWSAFHS-----  | 279 |
| tr A0A1U7R682 A0A1U7R682_MESAU | LGG-TVSGASSG---DDDDSDDEDREGSGD--GDWPSQVEFY--TSGVSWSAFHS-----  | 279 |
| tr A0A2K6SFK7 A0A2K6SFK7_SAIBB | HLARAICGASSG---DDDDSDDEDKEGSGD--GDWSSRVEFY--SSGVAWSAFHS-----  | 279 |
| tr A0A2K5E2Y5 A0A2K5E2Y5_AOTNA | HLARAICGASSG---DDDDSDDEDKEGSGD--GDWSSRVEFY--SSGVAWSAFHS-----  | 279 |
| tr U3D2H9 U3D2H9_CALJA         | HLARAICGASSG---DDDDSDDEDKEGSGD--GDWSSRVEFY--SSGVAWSAFHS-----  | 279 |
| tr A0A6J3FHK1 A0A6J3FHK1_SAPAP | HLTRPICGASSG---DDDDSDDEDKEGSGD--GDWSSRVEFY--SSGVAWSAFHS-----  | 279 |
| tr H0XH62 H0XH62_OTOGA         | LAGAVCGGASSG---DDDDSEEDREGGGD--GDWPSSVEFY--ASDVSWSAFHS-----   | 280 |
| tr A0A6J1Y5U6 A0A6J1Y5U6_ACIBJ | YLAGAICGASSG---DDDDSDDEDKEGSGD--GDWPSHVEFY--ASGVSWSSFHS-----  | 279 |
| tr A0A7N4PT60 A0A7N4PT60_SARHA | HPPATTYGASSGED-ESDKSDEKDKGSA--GSWPMGLEFY--ASGVKWSSFHS-----    | 284 |
| tr A0A6P3YLF4 A0A6P3YLF4_SHEEP | YLAGAVCGASSG---DDDDSDDEDREGSGD--GDWPSHVEFY--ASGVSWSSFHS-----  | 279 |
| tr G5BL44 G5BL44_HETGA         | HLGGAIFYGASSGDDGDDDDSDDEDKEGSRD--GDWPSRVQFY--ASGVSWSAFHS----- | 282 |
| tr A0A5K1U7A2 A0A5K1U7A2_CALJA | HLARAICGASSG---DDDDSDDEDKEGSGD--GDWSSRVEFY--SSGNAFPFRKPQ----- | 280 |
| tr A0A7J8CA60 A0A7J8CA60_MOLMO | SPARASCASSGD---DDDDSDDEDKEGSGD--GDWPGHVKEY--DSGVSWSSFHS-----  | 275 |
| sp Q68FU1 PKHF1_RAT            | LGS-TMCGASSG---DDDDSDDEDREGSGD--GDWPTQVEFY--ASGVSWSAFHS-----  | 279 |
| tr A0A5J5MWL9 A0A5J5MWL9_MUNRE | YLAGAVCGASSG---DDDDSDDEDREGSGD--ADWPSRVEFY--ASGVSWSSFHS-----  | 279 |
| tr A0A5N3VFQ3 A0A5N3VFQ3_MUNMU | YLAGAVCGASSG---DDDDSDDEDREGSGD--ADWPSRVEFY--ASGVSWSSFHS-----  | 279 |
| tr A0A452DRQ5 A0A452DRQ5_CAPHI | YLAGAVCGASSG---DDDDSDDEDREGSGD--GDWPSHVEFY--ASGVSWSSFHS-----  | 279 |
| tr A0A6J0XTU7 A0A6J0XTU7_ODOVR | YLAGAVCGASSG---DDDDSDDEDREGSGD--ADWPSRVEFY--ASGVSWSSFHS-----  | 279 |
| tr A0A1S3AR32 A0A1S3AR32_ERIEU | ---AHLVGASSG---DDDDSDDEDKEGGD--GDWPGQVKFY--ASN-IWSSFHS-----   | 272 |
| tr A0A7N4NQK3 A0A7N4NQK3_SARHA | HPPATTYGASSGED-ESDKSDEKDKGSA--GSWPMGLEFY--ASGVKWSSFHS-----    | 317 |
| tr A0A6P5K5Z3 A0A6P5K5Z3_PHACI | HSRGTTYGASSGED-ESDKSDEKDKGSA--GSWPTGVEFY--ASGVKWSSFHS-----    | 285 |

|                                |                                                              |     |
|--------------------------------|--------------------------------------------------------------|-----|
| tr A0A286XEI1 A0A286XEI1_CAVPO | HLGGALYGASSGDD----DSDEDKEGSRD--GDWPSRVQFY--ASSVSWSAFHS-----  | 278 |
| tr A0A6P5K5R9 A0A6P5K5R9_PHACI | HSRGTTYGASSGED-ESDKSDEEKDGGSA--GSWPTGVEFY--ASGVKWSFHS-----   | 303 |
| tr A0A6J0XTS7 A0A6J0XTS7_ODOVR | YLAGAVCGASSG---DDDDSDDEDREGSGD--ADWPSRVEFY--ASGVSWSSFHS----- | 320 |
| tr A0A485NDJ2 A0A485NDJ2_LYNPA | YLAGAICGASSG---DDDDSDDEDKEGSGD--GDWPSHVEFY--ASGVSWSSFHS----- | 283 |
| tr A0A667J1S0 A0A667J1S0_LYNCA | YLAGAICGASSG---DDDDSDDEDKEGSGD--GDWPSHVEFY--ASGVSWSSFHS----- | 283 |
| tr A0A4X2L5D8 A0A4X2L5D8_VOMUR | HSQGTTYGASSGED-ESDKSDEEKDGGSA--GSWPTGLEFY--ASGVKWSFHS-----   | 285 |
| tr A0A6P5K760 A0A6P5K760_PHACI | HSRGTTYGASSGED-ESDKSDEEKDGGSA--GSWPTGVEFY--ASGVKWSFHS-----   | 318 |
| tr M3WT21 M3WT21_FELCA         | YLAGAICGASSG---DDDDSDDEDKEGSGD--GDWPSHVEFY--ASGVSWSSFHS----- | 280 |
| tr A0A6P6H4E9 A0A6P6H4E9_PUMCO | YLAGAICGASSG---DDDDSDDEDKEGSGD--GDWPSHVEFY--ASGVSWSSFHS----- | 281 |
| tr A0A6P4TXR5 A0A6P4TXR5_PANPR | YLAGAICGASSG---DDDDSDDEDKEGSGD--GDWPSRVEFY--ASGVSWSSFHS----- | 281 |
| tr A0A2U3X5H7 A0A2U3X5H7_ODORO | -SAGAGCGASSG---DEEDSDEDKEGSGD--GDWPSRVEFY--ASGTWSAFHS-----   | 277 |
| tr A0A6G1B9W0 A0A6G1B9W0_CROCR | YLAGAVCGASSG---DDDDSDDEDKEGSGD--GDWPSQVEFY--ASGVSWSSFHS----- | 280 |
| tr A0A6J0E1B0 A0A6J0E1B0_PERMB | LGG-AVCGASSG---DDDDSDDEDREGSGD--GDWPSQVEFY--ASDVSWSAFHS----- | 279 |
| tr F7E2S4 F7E2S4_MONDO         | HSPGTTYGVSSGED-ESDKSDEKDKGGSS--GSWPMGLEFY--ATGVKWSFHS-----   | 303 |
| tr A0A6J0DUG8 A0A6J0DUG8_PERMB | LGG-AVCGASSG---DDDDSDDEDREGSGD--GDWPSQVEFY--ASDVSWSAFHS----- | 286 |
| tr A0A2Y9HYM5 A0A2Y9HYM5_NEOSC | -AAGAGCGASSG---DEEDSDEDKEGSGA--GDWPSRVEFY--ASGASWSAFHS-----  | 277 |
| tr A0A2U3Y6L0 A0A2U3Y6L0_LEPWE | -AAGAGCGASSG---DEEDSDEDKEGSGA--GDWPSRVEFY--ASGASWSAFHS-----  | 277 |
| tr A0A5E4BQ75 A0A5E4BQ75_MARMO | HLGGAFCGASSG---DDDDSDDEDREGSRD--GDWPSHVEFY--TSGVSWSAFHS----- | 279 |
| tr I3N3T1 I3N3T1_ICTTR         | HLGGAFCGASSG---DDDDSDDEDREGSRD--GDWPSHVEFY--TSGVSWSAFHS----- | 279 |
| tr F7AL15 F7AL15_ORNAN         | LR-----LAVG-----GTA--AYLNHALQ-----                           | 243 |
| tr A0A6J0E1A5 A0A6J0E1A5_PERMB | LGG-AVCGASSG---DDDDSDDEDREGSGD--GDWPSQVEFY--ASDVSWSAFHS----- | 296 |
| tr A0A3Q7MSJ7 A0A3Q7MSJ7_CALUR | -SAGAGCEASSG---DEEDSDEDKEGNGD--GDWPSSVEFY--ASGASWSAFHS-----  | 277 |
| tr A0A6J2F2G5 A0A6J2F2G5_ZALCA | -SAGAGCGASSG---DEEDSDEDKEGNGD--GDWPSGVEFY--ASGASWSAFHS-----  | 277 |
| tr A0A6P6EYH5 A0A6P6EYH5_OCTDE | HLGAAFYGASSGDD---DSDEDKEGSRD--GDWPSHVQFY--ASSVSWSAFHS-----   | 278 |
| sp Q3TB82 PKHF1_MOUSE          | LGG-TVCGASSG---DDDDSDDEDREGNGD--GDWPTQVEFY--ASGVSWSAFHS----- | 279 |
| tr A0A061HTX9 A0A061HTX9_CRIGR | LGGGTVYGASSG---DDDDSDDEDREGSGD--GDWPSQVEFY--TSGVSWSAFHS----- | 280 |
| tr A0A671FB93 A0A671FB93_RHIFE | AGSRALCGASSGD--EEDSDDEDREGSGD--GDWPSRVQFY--SSGVSWSSFHS-----  | 274 |
| tr A0A341AK17 A0A341AK17_NEOAA | YLAGAVCGASSG---DDDDSDDEDRESSGD--GDWPSRVEFY--ASGVTWSSFHS----- | 279 |
| tr A0A340YG10 A0A340YG10_LIPVE | YLAGAVCGASSG---DDDDSDDEDREGSGD--GDWPSRVEFY--ASGVSWSSFHS----- | 279 |
| tr A0A5N4DR82 A0A5N4DR82_CAMDR | YLAGAVCGASSG---EDDDSDDEDKEGSGD--GDWPSRVEFY--ASGVSWSSFHS----- | 279 |
| tr A0A4U1EUS3 A0A4U1EUS3_MONMO | YLAGAVCGASSG---DDDDSDDEDREGSGD--GDWPSRVEFY--ASGVTWSSFHS----- | 279 |
| tr A0A2Y9P694 A0A2Y9P694_DELLE | YLAGAVCGASSG---DDDDSDDEDREGSGD--GDWPSRVEFY--ASGVTWSSFHS----- | 279 |
| tr A0A2U3V2U0 A0A2U3V2U0_TURTR | YVAGAVCGASSG---DDDDSDDEDREGSGD--GDWPSRVEFY--ASGVSWSSFHS----- | 279 |
| tr A0A3Q7TL14 A0A3Q7TL14_VULVU | YLGGAECGASSG---DDEDSDEDKEGGGD--GDWPSRVEFY--ASGVSWSAFHS-----  | 283 |
| tr G1ML40 G1ML40_AILME         | -----                                                        | 224 |
| tr A0A6P7R571 A0A6P7R571_MUSCR | LGG-TVCGASSG---DDDDSDDEDREGNGD--GDWPTQVEFY--ASGVSWSAFHS----- | 279 |
| tr A0A3P4S7D1 A0A3P4S7D1_GULGU | YLPGAGAGASSG---DEEDSDEDKEGSGD--GDWPSHVEFY--ASGVSWSAFHS-----  | 281 |
| tr A0A6P3V9N9 A0A6P3V9N9_OCTDE | HLGAAFYGASSGDD---DXDEDKEGSRD--GDWPSHVQFY--ASSVSWSAFHS-----   | 278 |
| tr M3Z5G8 M3Z5G8_MUSPF         | YLSGAGTGASSG---DEEDSDEDKEGSGD--SNWSSRVEFY--ASGVSWSAFHS-----  | 285 |
| tr D2H395 D2H395_AILME         | YLAGAVCGASS-----                                             | 243 |
| tr A0A383YQU7 A0A383YQU7_BALAS | YLAGAVCGASSG---DDDDSDDEDREGSGD--GDWPSRVEFY--ASGVSWSSFHS----- | 279 |
| tr A0A2Y9F4I2 A0A2Y9F4I2_PHYMC | YLAGAVCGASSG---DDDDSDDEDREGSGD--GDWPSRVEFY--ASGVSWSSFHS----- | 279 |
| tr A0A2Y9LBN9 A0A2Y9LBN9_ENHLU | YLSGAGAGASSG---DEEDSDEDKEGSGD--GDWPSRVEFY--ASGVSWSAFHS-----  | 281 |
| tr A0A3Q7UUY9 A0A3Q7UUY9_URSAR | YLTGAVCGASSG---DDEDSDEDREGSGD--GDWPSRVEFY--SSGVSWSAFHS-----  | 279 |
| tr A0A2F0BD53 A0A2F0BD53_ESCRO | YLAGAVCGASSG---DDDDSDDEDREGSGD--GDWPSRVEFY--ASGVSWSSFHS----- | 298 |

|                                |                                                              |      |
|--------------------------------|--------------------------------------------------------------|------|
| tr G3UCB5 G3UCB5_LOXAF         | YLAGAVLVASSG---DDDDSDDEDKEGDGD--GDWPSRVEFY--ASGVSWSSFHS----- | 279  |
| tr A0A2Y9QH78 A0A2Y9QH78_TRIMA | YLAGAVFGASSG---DDDDSDDEDKEGSGD--GDWPSRVEFY--ASGASWSSFHS----- | 279  |
| tr A0A250YE73 A0A250YE73_CASCN | HLGGPGGGTSSC---DDDDSDEDR---D--VSWPSRVEFY--TSGVSWSSFHS-----   | 275  |
| tr A0A6I9K0J7 A0A6I9K0J7_CHRAS | HFAGA---ASSG---DDEDSDEDREGSGD--GDWSSRVHVFY--TSNVSWSSFHS----- | 276  |
| tr A0A452QT72 A0A452QT72_URSAM | YLAGAVCGASSG---DDEDSDEDREGSGD--GDWPSRVEFY--SSGVSWSAFHS-----  | 279  |
| tr A0A4X1TW95 A0A4X1TW95_PIG   | YLAGAVCGASSG---DDDDSDDEDREG-GD--GDWPSRVEFY--AGGVSWSSFHS----- | 283  |
| tr F1RNZ0 F1RNZ0_PIG           | YLAGAVCGASSG---DDDDSDDEDREG-GD--GDWPSRVEFY--AGGVSWSSFHS----- | 283  |
| tr A0A484GVY7 A0A484GVY7_SOUCH | YLAGAVCGASSG---DDDDSDDEDREGSGD--GDWPSRVEFY--ASGVSWSSFHS----- | 348  |
| tr A0A7J8CKE8 A0A7J8CKE8_ROUAE | -PAGAGSGASSG-E-DEDDSEDDKEGSGD--SDWPSRVKFY--AAGVSWSSFHS-----  | 275  |
| tr A0A5G2RAS5 A0A5G2RAS5_PIG   | YLAGAVCGASSG---DDDDSDDEDREG-GD--GDWPSRVEFY--AGGVSWSSFHS----- | 294  |
| tr A0A1A6G1C6 A0A1A6G1C6_NEOLE | LGG-AVCGASSG---DDDDSDDEDREGSGD--GDWPSQVEFY--ASGVSWSAFHS----- | 297  |
| tr A0A6J2L2L8 A0A6J2L2L8_9CHIR | SPARAGCGASSG--D-EDSDDDREGSGD--GDWPSRVRFY--DSGVSWSSFHS-----   | 277  |
| tr A0A3Q2LSN2 A0A3Q2LSN2_HORSE | CLAGAICGASSG---DDYDSDDEDKEGSGD--GEWPSHVEFY--TSGVSWSSFHS----- | 330  |
| tr E2R1B7 E2R1B7_CANLF         | YLGAECGASSG---DDEDSDEDKEGGGD--GDWPSHVEFY--ASGVSWSAFHG-----   | 465  |
| tr K9IX34 K9IX34_DESRO         | SLAGAGCGASSG---EDSDDEDREGSAD--GDWPSRVRFY--DSGVSWSAFHS-----   | 279  |
| tr A0A7J7SDK0 A0A7J7SDK0_MYOMY | SEAGAGCGVSSGDE-DDDDSEEDKEGGGE--GDWPSRIRFY--DSGVSWSSFHS-----  | 284  |
| tr A0A6P3IET2 A0A6P3IET2_BISBI | HLAGAVCGASSG---DDDDSDDEDKEGSGD--GDWPSHVEFY--ASGVSWSSFHS----- | 265  |
| tr G3HI22 G3HI22_CRIGR         | -----NDVSDDDD-----DDSS-----D-----                            | 122  |
| tr G5C4B3 G5C4B3_HETGA         | -----NNVSDDDED-----DDSSD-----                                | 127  |
| tr W5P1M9 W5P1M9_SHEEP         | YLAGAVCGASSG---DDDDSDDEDREGSGD--GDWPSHVEFY--ASGVSWSSFHS----- | 225  |
| tr S9WTG5 S9WTG5_CAMFR         | YLAGAVCGASSGED---DSDDEDKEGSGD--GDWPSRVEFY--ASGVSWSSFHS-----  | 303  |
| tr A0A6J0AU76 A0A6J0AU76_VICPA | YLAGAVCGASSG---EDDDSDDEDKEGSGD--GDWPSRVEFY--ASGVSWSSFHS----- | 246  |
| tr L5KVX2 L5KVX2_PTEAL         | -PAGAGSGASSG-E-DEDDSEEDKEGSGD--GDWPSRVKFY--GEGVSWSSFHS-----  | 302  |
| tr A0A2J8KSN2 A0A2J8KSN2_PANTR | -----                                                        | 128  |
| tr A0A2J8SAE9 A0A2J8SAE9_PONAB | -----                                                        | 128  |
| tr K7ELB8 K7ELB8_HUMAN         | -----                                                        | 128  |
| tr L8Y3Z0 L8Y3Z0_TUPCH         | HLTGAVCGASSG---DDDDSDDEDKEGYGD--GDWPSHVEFY--ASGVSWSAFHR----- | 640  |
| tr A0A2J8KSM7 A0A2J8KSM7_PANTR | -----                                                        | 82   |
| tr A0A2J8SAE1 A0A2J8SAE1_PONAB | -----                                                        | 82   |
| tr K7EIX0 K7EIX0_HUMAN         | -----                                                        | 82   |
| tr A0A2J8KVM1 A0A2J8KVM1_PANTR | -----                                                        | 279  |
| tr A0A2J8XN15 A0A2J8XN15_PONAB | -----                                                        | 279  |
| tr F8VQX5 F8VQX5_HUMAN         | -----                                                        | 279  |
| tr A0A4X2MDN9 A0A4X2MDN9_VOMUR | -LSSVLHSIPSGRKQKKIP-AALKEVSANTEDSTMSGYLYRSKGSKKPWKHFVFIKNKV  | 1342 |
| tr A0A4X2M634 A0A4X2M634_VOMUR | -LSSVLHSIPSGRKQKKIP-AALKEVSANTEDSTMSGYLYRSKGSKKPWKHFVFIKNKV  | 1375 |
| tr F6W6U6 F6W6U6_MONDO         | -LSSVLHSIPSGRKQKKIP-AALKEVSANTEDSTMSGYLYRSKGSKKPWKHFVFIKNKV  | 1369 |

## Humans

|                        |                                          |     |
|------------------------|------------------------------------------|-----|
| sp Q9H8W4 PKHF2_HUMAN  | -DDDDD-----DSSD-----                     | 249 |
| sp Q96S99 PKHF1_HUMAN  | -GDDDD-----SDEDKEG-----SRDGDWPSSVE-----F | 267 |
| tr B4DWN9 B4DWN9_HUMAN | -GDDDD-----SDEDKEG-----SRDGDWPSSVE-----F | 352 |
| tr K7ELB8 K7ELB8_HUMAN | -----                                    | 128 |
| tr K7EIX0 K7EIX0_HUMAN | -----                                    | 82  |

|                                |                                                            |      |
|--------------------------------|------------------------------------------------------------|------|
| tr F8VQX5 F8VQX5_HUMAN         | -----                                                      | 279  |
| tr A4FVC4 A4FVC4_HUMAN         | -PSSALSSVLH----SIP--SG-----RKQKKIPAAALKEVSANT---EDSS-MSGYL | 549  |
| sp Q6ZV73 FGD6_HUMAN           | -PSSALSSVLH----SIP--SG-----RKQKKIPAAALKEVSANT---EDSS-MSGYL | 1340 |
| tr A0A2X0SFJ2 A0A2X0SFJ2_HUMAN | -PSSALSSVLH----SIP--SG-----RKQKKIPAAALKEVSANT---EDST-MSGYL | 1308 |
| tr Q49A55 Q49A55_HUMAN         | GILE-----IESAEVSGNSVVCS-FLQ--                              | 403  |
| tr F8W1R0 F8W1R0_HUMAN         | GILE-----IESAEVSGNSVVCS-FLQ--                              | 558  |
| sp Q96M96 FGD4_HUMAN           | GILE-----IESAEVSGNSVVCS-FLQ--                              | 651  |
| tr A0A2X0U2J9 A0A2X0U2J9_HUMAN | GILE-----IESAEVSGNSVVCS-FLQ--                              | 651  |
| tr B7Z493 B7Z493_HUMAN         | GILE-----IESAEVSGNSVVCS-FLQ--                              | 736  |
| tr B7Z8F9 B7Z8F9_HUMAN         | GILE-----IESAEVSGNSVVCS-FLQ--                              | 763  |
| tr E9PJX4 E9PJX4_HUMAN         | GILE-----IESAEVSGNSVVCS-FLQ--                              | 763  |
| tr F8VWL3 F8VWL3_HUMAN         | GILE-----IESAEVSGNSVVCS-FLQ--                              | 788  |
| sp Q7Z6J4 FGD2_HUMAN           | GILE-----KGSSATPDQSLMCS-FLQ--                              | 552  |
| tr A8K304 A8K304_HUMAN         | GILE-----KGSSATPDQSLMCS-FLQ--                              | 552  |
| tr A0A384NQ05 A0A384NQ05_HUMAN | GILE-----KGSSATPDQSLMCS-FLQ--                              | 552  |
| tr A0A2X0SYZ7 A0A2X0SYZ7_HUMAN | GILE-----KGSSATPDQSLMCS-FLQ--                              | 552  |
| sp P98174 FGD1_HUMAN           | SILE-----KQASVAAENSVICS-FLH--                              | 829  |
| tr A0A024R9Y5 A0A024R9Y5_HUMAN | SILE-----KQASVAAENSVICS-FLH--                              | 829  |
| tr A0A2X0SFE1 A0A2X0SFE1_HUMAN | SILE-----KQASVAAENSVICS-FLH--                              | 829  |
| tr G3V2D8 G3V2D8_HUMAN         | -ESPPYSFVVR----V---PK-----ADEVEWILDLKEEE-----NELV-RSEFY    | 1927 |
| tr A0A7I2YQV0 A0A7I2YQV0_HUMAN | -ESPPYSFVVR----V---PK-----ADEVEWILDLKEEE-----NELV-RSEFY    | 1901 |
| sp Q68DK2 ZFY26_HUMAN          | -ESPPYSFVVR----V---PK-----ADEVEWILDLKEEE-----NELV-RSEFY    | 1927 |
| tr A0A7I2YQU3 A0A7I2YQU3_HUMAN | -ESPPYSFVVR----V---PK-----ADEVEWILDLKEEE-----NELV-RSEFY    | 1933 |
| tr A0A7I2V403 A0A7I2V403_HUMAN | -ESPPYSFVVR----V---PK-----ADEVEWILDLKEEE-----NELV-RSEFY    | 1942 |
| tr B7ZM68 B7ZM68_HUMAN         | -SGSAFSSVFQ----SINPSTF-----KKQKKVPSALT-----                | 1114 |
| tr A3KMQ0 A3KMQ0_HUMAN         | -SGSAFSSVFQ----SINPSTF-----KKQKKVPSALTEVAASG---EGSA-ISGYL  | 1129 |
| sp Q6ZNL6 FGD5_HUMAN           | -SGSAFSSVFQ----SINPSTF-----KKQKKVPSALTEVAASG---EGSA-ISGYL  | 1370 |
| tr A0A2X0SFF2 A0A2X0SFF2_HUMAN | -SGSAFSSVFQ----SINPSTF-----KKQKKVPSALTEVAASG---EGSA-ISGYL  | 1370 |
| sp Q8WXA3 RUFY2_HUMAN          | -----                                                      | 606  |
| tr H0YD93 H0YD93_HUMAN         | -----                                                      | 620  |
| tr B3KSL1 B3KSL1_HUMAN         | -----                                                      | 310  |
| tr A8K7B1 A8K7B1_HUMAN         | -----                                                      | 600  |
| sp Q96T51 RUFY1_HUMAN          | -----                                                      | 708  |
| tr Q59GI4 Q59GI4_HUMAN         | -----                                                      | 1333 |
| sp Q95405 ZFYV9_HUMAN          | -----                                                      | 1425 |
| sp Q7Z3T8 ZFY16_HUMAN          | -----                                                      | 1539 |
| tr A0A024RAL3 A0A024RAL3_HUMAN | -----                                                      | 1539 |
| tr B4DVN4 B4DVN4_HUMAN         | GILE-----KGSSATPDQSLMCS-FLQ--                              | 180  |
| sp Q15075 EEA1_HUMAN           | -----                                                      | 1411 |
| tr Q49AA1 Q49AA1_HUMAN         | -----                                                      | 192  |
| tr F8VY01 F8VY01_HUMAN         | -----                                                      | 1206 |
| sp Q9HCC9 LST2_HUMAN           | -----                                                      | 887  |
| sp Q9Y4F1 FARP1_HUMAN          | -----AVENQ--LSGNL                                          | 939  |
| tr A0A2X0TVY0 A0A2X0TVY0_HUMAN | -----AVENQ--LSGNL                                          | 939  |
| tr B4DS99 B4DS99_HUMAN         | -----                                                      | 525  |

|                                |                                                        |      |
|--------------------------------|--------------------------------------------------------|------|
| tr G5E953 G5E953_HUMAN         | -PIAATSN-----                                          | 1062 |
| sp Q13615 MTMR3_HUMAN          | -PIAATSN-----                                          | 1198 |
| tr A8K0L6 A8K0L6_HUMAN         | -PIAATSN-----                                          | 1198 |
| tr A7E2W2 A7E2W2_HUMAN         | -PIAATSN-----                                          | 1198 |
| sp Q5JSP0 FGD3_HUMAN           | -----DPQPSLLCG-PLR--                                   | 612  |
| tr A0A024R252 A0A024R252_HUMAN | -----DPQPSLLCG-PLR--                                   | 612  |
| tr A0A2X0U4Q9 A0A2X0U4Q9_HUMAN | -----DPQPSLLCG-PLR--                                   | 612  |
| tr Q9H8N9 Q9H8N9_HUMAN         | -G-----LMVTCGTD--RIVKIWDMP-----VVGC-----S              | 359  |
| sp Q8IWB7 WDFY1_HUMAN          | -G-----LMVTCGTD--RIVKIWDMP-----VVGC-----S              | 402  |
| tr A0A024R488 A0A024R488_HUMAN | -G-----LMVTCGTD--RIVKIWDMP-----VVGC-----S              | 402  |
| tr A0A7I2YQD1 A0A7I2YQD1_HUMAN | -----QSQLPPKRD-ETA-----LQEEEEELQLALALSQSEAEKERLRQKSTYT | 264  |
| tr I3L1P5 I3L1P5_HUMAN         | -----QSQLPPKRD-ETA-----LQEEEEELQLALALSQSEAEKERLRQKSTYT | 287  |
| tr B4E1E2 B4E1E2_HUMAN         | -----QSQLPPKRD-ETA-----LQEEEEELQLALALSQSEAEKERLRQKSTYT | 287  |
| tr A0A7I2V3Z1 A0A7I2V3Z1_HUMAN | -----QSQLPPKRD-ETA-----LQEEEEELQLALALSQSEAEKERLRQKSTYT | 220  |
| tr Q9NXY1 Q9NXY1_HUMAN         | SCSP-----PGGAAEPPDTCSCA-PAA--                          | 685  |
| tr A0A0S2Z4Q4 A0A0S2Z4Q4_HUMAN | -----QSQ-----                                          | 247  |
| tr A0A7I2V6E0 A0A7I2V6E0_HUMAN | -----QSQLPPKRD-ETA-----LQEEEEELQLALALSQSEAEKERLRQKSTYT | 220  |
| tr A8K9G1 A8K9G1_HUMAN         | -----DPQPSLLCG-PLR--                                   | 611  |
| tr A0A7I2V2K2 A0A7I2V2K2_HUMAN | -----QSQLPPKRD-ETA-----LQEEEEELQLALALSQSEAEKERLRQKSTYT | 287  |
| tr A0A7I2V5A2 A0A7I2V5A2_HUMAN | -----QSQLPPKRD-ETA-----LQEEEEELQLALALSQSEAEKERLRQKSTYT | 287  |
| tr A0A7I2V3I8 A0A7I2V3I8_HUMAN | -----QSQLPPKRD-ETA-----LQEEEEELQLALALSQSEAEKERLRQKSTYT | 271  |
| tr A0A7I2V3F9 A0A7I2V3F9_HUMAN | -----QSQLPPKRD-ETA-----LQEEEEELQLALALSQSEAEKERLRQKSTYT | 287  |
| tr A0A7I2V2D8 A0A7I2V2D8_HUMAN | -----QSQLPPKRD-ETA-----LQEEEEELQLALALSQSEAEKERLRQKSTYT | 287  |
| tr A0A7I2V2W5 A0A7I2V2W5_HUMAN | -----QSQLPPKRD-ETA-----LQEEEEELQLALALSQSEAEKERLRQKSTYT | 278  |
| tr A0A7I2V2R9 A0A7I2V2R9_HUMAN | -----QSQLPPKRD-ETA-----LQEEEEELQLALALSQSEAEKERLRQKSTYT | 287  |
| sp O14964 HGS_HUMAN            | -----QSQLPPKRD-ETA-----LQEEEEELQLALALSQSEAEKERLRQKSTYT | 287  |
| tr A0A7I2V3J3 A0A7I2V3J3_HUMAN | -----QSQLPPKRD-ETA-----LQEEEEELQLALALSQSEAEKERLRQKSTYT | 287  |
| tr A0A0S2Z4R4 A0A0S2Z4R4_HUMAN | -----QSQLPPKRD-ETA-----LQEEEEELQLALALSQSEAEKERLRQKSTYT | 287  |
| tr A0A7I2V637 A0A7I2V637_HUMAN | -----QSQLPPKRD-ETA-----LQEEEEELQLALALSQSEAEKERLRQKSTYT | 305  |
| tr A0A7I2V5A3 A0A7I2V5A3_HUMAN | -----QSQLPPKRD-ETA-----LQEEEEELQLALALSQSEAEKERLRQKSTYT | 287  |
| tr B4DFP5 B4DFP5_HUMAN         | -----                                                  | 221  |
| sp O94887 FARP2_HUMAN          | -----AVENQ-LSGYL                                       | 936  |
| tr A0A2X0SSL3 A0A2X0SSL3_HUMAN | -----AVENQ-LSGYL                                       | 936  |
| tr J3QR65 J3QR65_HUMAN         | -PIATASS-----                                          | 1138 |
| sp Q9NYA4 MTMR4_HUMAN          | -PIATASS-----                                          | 1195 |
| tr Q5H9P4 Q5H9P4_HUMAN         | -----                                                  | 924  |
| sp Q9P2R3 ANFY1_HUMAN          | -----                                                  | 1169 |
| tr A0A7I2V307 A0A7I2V307_HUMAN | -----QSQLPPKRD-ETA-----LQEEEEELQLALALSQSEAEKERLRQKSTYT | 293  |
| tr A0A024R1I2 A0A024R1I2_HUMAN | -PIAATSN-----                                          | 1161 |
| sp Q9HBF4 ZFYV1_HUMAN          | -----                                                  | 777  |
| tr G3V5N8 G3V5N8_HUMAN         | -----                                                  | 789  |
| tr C9JME2 C9JME2_HUMAN         | -----AVENQ-LSGNL                                       | 970  |
| tr C9JL08 C9JL08_HUMAN         | -----                                                  | 241  |
| sp Q9BQ24 ZFY21_HUMAN          | -----                                                  | 234  |
| tr E9PDH4 E9PDH4_HUMAN         | -----IF-----I-----KRQAPLKVSLLQDLKDFQK-----             | 1363 |

|                                |                                                               |      |
|--------------------------------|---------------------------------------------------------------|------|
| sp Q9Y2I7 FYV1_HUMAN           | -----IF-----I-----KRQAPLKVSLLQDLKDFQK-----                    | 1419 |
| tr V9HWG4 V9HWG4_HUMAN         | -----IF-----I-----KRQAPLKVSLLQDLKDFQK-----                    | 1419 |
| tr A0A7I2V5X2 A0A7I2V5X2_HUMAN | -----HSQRRRRRR-G-----                                         | 74   |
| tr A7E1Z6 A7E1Z6_HUMAN         | -----                                                         | 281  |
| tr Q96LK4 Q96LK4_HUMAN         | -G-----WLLTSRTD---KVIKLWDMTP-----VVS-----                     | 297  |
| sp Q9BQS8 FYC01_HUMAN          | GPQAT-----G---G---QGANTDYRPPDDAVFDIIT-----DEELCQ-IQESG        | 1295 |
| sp Q96P53 WDFY2_HUMAN          | -G-----WLLTSGTD---KVIKLWDMTP-----VVS-----                     | 400  |
| tr A7E293 A7E293_HUMAN         | -----                                                         | 1563 |
| sp Q8IZQ1 WDFY3_HUMAN          | -----                                                         | 3526 |
| tr A0A024RDC2 A0A024RDC2_HUMAN | -----                                                         | 3526 |
| tr B4DXH4 B4DXH4_HUMAN         | -----DPQPSLLCG-PLR--                                          | 215  |
| tr A0A7I2V5N3 A0A7I2V5N3_HUMAN | -----                                                         | 64   |
| tr A0A7I2V5W6 A0A7I2V5W6_HUMAN | -----                                                         | 64   |
| tr Q96P52 Q96P52_HUMAN         | -----                                                         | 420  |
| tr B3KPJ0 B3KPJ0_HUMAN         | -----EFSDDWTLSGKDNSGLIEQVGKCS-LLPYF                           | 564  |
| tr H0Y696 H0Y696_HUMAN         | -----EFSDDWTLSGKDNSGLIEQVGKCS-LLPYF                           | 573  |
| tr A8K4R4 A8K4R4_HUMAN         | -----                                                         | 1104 |
| tr Q6IQ41 Q6IQ41_HUMAN         | -----EFSDDWTLSGKVGN-----                                      | 1237 |
| sp Q96Q42 ALS2_HUMAN           | -----EFSDDWTLSGKGTLTMPNGD---Y-IEGYF                           | 1249 |
| tr A0A2X0SFA0 A0A2X0SFA0_HUMAN | -----EFSDDWTLSGKGTLTMPNGD---Y-IEGYF                           | 1249 |
| sp Q9H1K0 RBNS5_HUMAN          | EYIRMAASLNA----GETTYSLEHASDLRVEVQKVYELID-----ALSKK-ILTLG      | 340  |
| tr A8K5H3 A8K5H3_HUMAN         | EYIRMAASLNA----GETTYSLEHASDLRVEVQKVYELID-----ALSKK-ILTLG      | 340  |
| tr H3BRF9 H3BRF9_HUMAN         | -----QSQ---GLT-----RQDQMIA-----ERLARL-RQE--                   | 164  |
| sp Q8TCU6 PREX1_HUMAN          | GCLEHLFNQVD----SINALLKGPVMSRAFEETKHFPNM--HSLQEFKQKEECT-IRGRS  | 1272 |
| tr A0A2X0SFH1 A0A2X0SFH1_HUMAN | GCLEHLFNQVD----SINALLKGPVMSRAFEETKHFPNM--HSLQEFKQKEECT-IRGRS  | 1272 |
| tr M0QXT1 M0QXT1_HUMAN         | -----                                                         | 248  |
| tr B3KPZ0 B3KPZ0_HUMAN         | -----                                                         | 1093 |
| tr H3BRM1 H3BRM1_HUMAN         | -----QSQ---GLT-----RQDQMIA-----ERLARL-RQE--                   | 158  |
| tr E9PJM7 E9PJM7_HUMAN         | -----                                                         | 226  |
| sp Q96K21 ANCHR_HUMAN          | -----QSQ---GLT-----RQDQMIA-----ERLARL-RQE--                   | 187  |
| tr B4E245 B4E245_HUMAN         | -----                                                         | 516  |
| tr E7EMB1 E7EMB1_HUMAN         | -----                                                         | 527  |
| tr B3KUB9 B3KUB9_HUMAN         | -----                                                         | 527  |
| sp Q9UH65 SWP70_HUMAN          | -----                                                         | 585  |
| sp Q70Z35 PREX2_HUMAN          | SCLEHLFSQVD----SITNLLKGQAVVRAFDQTKYLTPG--RGLQEFQQEMEPEK-LSCPK | 1212 |
| tr A0A2X0SZ31 A0A2X0SZ31_HUMAN | SCLEHLFSQVD----SITNLLKGQAVVRAFDQTKYLTPG--RGLQEFQQEMEPEK-LSCPK | 1212 |
| tr H3BN64 H3BN64_HUMAN         | -----QSQ---GLT-----RQDQMIA-----ERLARL-RQE--                   | 115  |
| tr H7C3C4 H7C3C4_HUMAN         | -EQPKFLGIREQRVTGLMIFILMGLSVFMTSVLKFI PMPVLYGVFLYMGV--SS-LKGIQ | 604  |
| tr C9JRP1 C9JRP1_HUMAN         | -EQPKFLGIREQRVTGLMIFILMGLSVFMTSVLKFI PMPVLYGVFLYMGV--SS-LKGIQ | 949  |
| tr A0A0A0MST8 A0A0A0MST8_HUMAN | -EQPKFLGIREQRVTGLMIFILMGLSVFMTSVLKFI PMPVLYGVFLYMGV--SS-LKGIQ | 1038 |
| tr B5M450 B5M450_HUMAN         | -EQPKFLGIREQRVTGLMIFILMGLSVFMTSVLKFI PMPVLYGVFLYMGV--SS-LKGIQ | 1049 |
| tr E9PFN4 E9PFN4_HUMAN         | -EQPKFLGIREQRVTGLMIFILMGLSVFMTSVLKFI PMPVLYGVFLYMGV--SS-LKGIQ | 1049 |
| sp Q9Y6M7 S4A7_HUMAN           | -EQPKFLGIREQRVTGLMIFILMGLSVFMTSVLKFI PMPVLYGVFLYMGV--SS-LKGIQ | 1053 |
| tr Q5JYV0 Q5JYV0_HUMAN         | -----                                                         | 172  |
| tr E7EW28 E7EW28_HUMAN         | -EQPKFLGIREQRVTGLMIFILMGSSVFMTSILKFI PMPVLYGVFLYMGV--SS-LKGIQ | 954  |

|                                |                                                              |      |
|--------------------------------|--------------------------------------------------------------|------|
| tr C9J240 C9J240_HUMAN         | -EQPKFLGIREQRVTGLMIFILMGSSVFMTSILKFIPMPVLYGVFLYMGA--SS-LKGIQ | 924  |
| sp Q6U841 S4A10_HUMAN          | -EQPKFLGIREQRVTGLMIFILMGSSVFMTSILKFIPMPVLYGVFLYMGA--SS-LKGIQ | 954  |
| sp Q13049 TRI32_HUMAN          | -----                                                        | 653  |
| tr A0A024R843 A0A024R843_HUMAN | -----                                                        | 653  |
| sp P52735 VAV2_HUMAN           | -----                                                        | 878  |
| tr B4DFS9 B4DFS9_HUMAN         | -----                                                        | 328  |
| tr H0Y724 H0Y724_HUMAN         | -----                                                        | 0    |
| tr B4E2V8 B4E2V8_HUMAN         | ----RFVSMNR----GINN-----GSDLPEDQLRNLFDSIK-----               | 182  |
| sp Q9UIA0 CYH4_HUMAN           | ----RFVSMNR----GINN-----GSDLPEDQLRNLFDSIK-----               | 239  |
| tr B2RCD2 B2RCD2_HUMAN         | ----RFVSMNR----GINN-----GSDLPEDQLRNLFDSIK-----               | 239  |
| tr A7E2A5 A7E2A5_HUMAN         | -----ATLDS DHKLP SRVIEELNVVLQRSRTL-PKELQ                     | 1628 |
| sp Q8WZ64 ARAP2_HUMAN          | -----ATLDS DHKLP SRVIEELNVVLQRSRTL-PKELQ                     | 1698 |
| tr A0A2X0SFS3 A0A2X0SFS3_HUMAN | -----ATLDS DHKLP SRVIEELNVVLQRSRTL-PKELQ                     | 1698 |
| tr B4DZ04 B4DZ04_HUMAN         | -----                                                        | 415  |
| tr B4E1Y1 B4E1Y1_HUMAN         | -----                                                        | 415  |
| tr Q5SQI7 Q5SQI7_HUMAN         | -----                                                        | 542  |
| tr A0A2X0SFV4 A0A2X0SFV4_HUMAN | -----                                                        | 544  |
| sp Q7Z628 ARHG8_HUMAN          | -----                                                        | 596  |
| tr Q5SQI5 Q5SQI5_HUMAN         | -----                                                        | 596  |
| tr B4DS29 B4DS29_HUMAN         | -----                                                        | 677  |
| sp Q2Y0W8 S4A8_HUMAN           | -EQPKFLGIREQRVTGLMIFVLMGCSVFMTAILKFIPMPVLYGVFLYMGV--SS-LQGIQ | 923  |
| tr Q9NUL6 Q9NUL6_HUMAN         | ----RFVSMNR----GINN-----GSDLPEDQLRNLFDSIK-----               | 46   |
| tr A0A0D9SFG6 A0A0D9SFG6_HUMAN | ----RFVAMNR----GINE-----GGDLPEELLRNLYDSIR-----               | 239  |
| sp Q6ZNE9 RUFY4_HUMAN          | -----                                                        | 571  |
| tr B2RBP7 B2RBP7_HUMAN         | -----                                                        | 631  |
| sp Q8IVQ6 ZDH21_HUMAN          | -RLAAFMG-----ITMLVG-----ITGLFYTQLIGIITD-----TTS-IE---        | 213  |
| tr Q15795 Q15795_HUMAN         | ----RFVAMNR----GINE-----GGDLPEELLRNLYDSIR-----               | 105  |
| tr C9JKV5 C9JKV5_HUMAN         | -----                                                        | 131  |
| sp Q9P2F6 RHG20_HUMAN          | ---PHASGVPE-----ANSLQ-----EEQKDLPLRAAEG LSPVQSAQRCS-SSPFQ    | 1116 |
| tr A0A2X0U2C5 A0A2X0U2C5_HUMAN | ---PHASGVPE-----ANSLQ-----EEQKDLPLRAAEG LSPVQSAQRCS-SSPFQ    | 1116 |
| tr E9PNM3 E9PNM3_HUMAN         | RPILQA-GLPA---N-KTVALGSNVEFM-----CK-VYS--                    | 281  |
