# Supplementary material for: The PH Domain and C-Terminal polyD Motif of Phafin2 Exhibit a Unique Concurrence in Animals
Source: MDPI journal article supplement (doi:10.3390/membranes12070696), 2022-07-07
Supplement: s1 [file s1]

**Supplementary File S5:** BLAST results and Multiple sequence alignment of human Phafin2 with each of top hit protozoan sequence search.

### **BLAST result**

| <i>Description</i>                                                                                   | <i>Scientific Name</i>            | <i>Taxid</i> | <i>Max Score</i> | <i>Total Score</i> | <i>Query Cover</i> | <i>E value</i> | <i>Per. Ident</i> | <i>Acc. Len</i> | <i>Accession</i> |
|------------------------------------------------------------------------------------------------------|-----------------------------------|--------------|------------------|--------------------|--------------------|----------------|-------------------|-----------------|------------------|
| Rho guanine nucleotide exchange factor, putative [Entamoeba histolytica HM-1:IMSS]                   | Entamoeba histolytica HM-1:IMSS   | 294381       | 140              | 140                | 71%                | 1e-38          | 43.09%            | 455             | XP_655361.1      |
| Rho guanine nucleotide exchange factor, putative [Entamoeba histolytica HM-1:IMSS]                   | Entamoeba histolytica HM-1:IMSS   | 294381       | 129              | 129                | 71%                | 6e-34          | 38.46%            | 555             | XP_649382.1      |
| Rho guanine nucleotide exchange factor, putative [Entamoeba histolytica HM-1:IMSS]                   | Entamoeba histolytica HM-1:IMSS   | 294381       | 124              | 124                | 89%                | 1e-32          | 36.13%            | 441             | XP_651719.1      |
| Rho guanine nucleotide exchange factor, putative [Entamoeba histolytica HM-1:IMSS]                   | Entamoeba histolytica HM-1:IMSS   | 294381       | 124              | 124                | 97%                | 7e-32          | 32.16%            | 631             | XP_651964.1      |
| Rho guanine nucleotide exchange factor, putative [Entamoeba histolytica HM-1:IMSS-B]                 | Entamoeba histolytica HM-1:IMSS-B | 885319       | 107              | 107                | 79%                | 2e-26          | 34.31%            | 460             | EMH78141.1       |
| Rho guanine nucleotide exchange factor, putative [Entamoeba histolytica HM-1:IMSS]                   | Entamoeba histolytica HM-1:IMSS   | 294381       | 107              | 107                | 79%                | 4e-26          | 34.31%            | 492             | XP_655384.1      |
| Rho guanine nucleotide exchange factor, putative [Entamoeba histolytica HM-1:IMSS]                   | Entamoeba histolytica HM-1:IMSS   | 294381       | 105              | 105                | 80%                | 1e-25          | 35.05%            | 495             | XP_656365.1      |
| Rho/RAC guanine nucleotide exchange factor, putative [Entamoeba histolytica HM-3:IMSS]               | Entamoeba histolytica HM-3:IMSS   | 885315       | 104              | 104                | 79%                | 5e-25          | 33.99%            | 876             | EMS15045.1       |
| Rho guanine nucleotide exchange factor, putative [Entamoeba histolytica HM-1:IMSS]                   | Entamoeba histolytica HM-1:IMSS   | 294381       | 104              | 104                | 79%                | 5e-25          | 33.99%            | 876             | XP_651436.1      |
| rho/RAC guanine nucleotide exchange factor, putative [Entamoeba histolytica KU27]                    | Entamoeba histolytica KU27        | 885311       | 104              | 104                | 79%                | 5e-25          | 33.99%            | 745             | EMD43911.1       |
| Rho guanine nucleotide exchange factor, putative [Entamoeba histolytica HM-1:IMSS]                   | Entamoeba histolytica HM-1:IMSS   | 294381       | 103              | 103                | 81%                | 1e-24          | 32.21%            | 730             | XP_656765.1      |
| Rho guanine nucleotide exchange factor, putative [Entamoeba histolytica HM-1:IMSS]                   | Entamoeba histolytica HM-1:IMSS   | 294381       | 101              | 101                | 88%                | 4e-24          | 29.61%            | 696             | XP_654401.1      |
| Rho guanine nucleotide exchange factor, putative [Entamoeba histolytica HM-1:IMSS]                   | Entamoeba histolytica HM-1:IMSS   | 294381       | 85.9             | 85.9               | 70%                | 7e-19          | 31.49%            | 452             | XP_651674.1      |
| Rho guanine nucleotide exchange factor, putative [Entamoeba histolytica HM-1:IMSS]                   | Entamoeba histolytica HM-1:IMSS   | 294381       | 79.0             | 79.0               | 71%                | 3e-16          | 30.05%            | 725             | XP_651711.2      |
| Rho guanine nucleotide exchange factor, putative [Entamoeba histolytica HM-3:IMSS]                   | Entamoeba histolytica HM-3:IMSS   | 885315       | 77.4             | 77.4               | 38%                | 7e-16          | 41.67%            | 487             | EMS16071.1       |
| High-resolution solution structure of the LM5-1 FYVE domain from Leishmania major [Leishmania major] | Leishmania major                  | 5664         | 64.3             | 64.3               | 32%                | 3e-13          | 39.51%            | 84              | 1Z2Q_A           |
| conserved hypothetical protein [Leishmania major strain Friedlin]                                    | Leishmania major strain Friedlin  | 347515       | 56.2             | 56.2               | 26%                | 9e-09          | 42.65%            | 377             | XP_003722823.1   |

|                                                                                 |                                         |        |      |      |     |       |        |      |                |
|---------------------------------------------------------------------------------|-----------------------------------------|--------|------|------|-----|-------|--------|------|----------------|
| FYVE_zinc_finger_containing_protein_putative [Leishmania major strain Friedlin] | <i>Leishmania major</i> strain Friedlin | 347515 | 51.2 | 51.2 | 28% | 1e-07 | 36.99% | 172  | CAG9576238.1   |
| conserved hypothetical protein [Leishmania major strain Friedlin]               | <i>Leishmania major</i> strain Friedlin | 347515 | 49.3 | 49.3 | 28% | 2e-06 | 32.61% | 2420 | XP_001684146.1 |
| zinc finger protein, putative [Entamoeba histolytica HM-1:IMSS]                 | <i>Entamoeba histolytica</i> HM-1:IMSS  | 294381 | 48.1 | 48.1 | 26% | 4e-06 | 36.36% | 395  | XP_656065.1    |
| conserved hypothetical protein [Leishmania major strain Friedlin]               | <i>Leishmania major</i> strain Friedlin | 347515 | 48.1 | 48.1 | 24% | 5e-06 | 42.62% | 636  | XP_001682467.1 |
| putative ras-like small GTPases [Leishmania major strain Friedlin]              | <i>Leishmania major</i> strain Friedlin | 347515 | 47.4 | 47.4 | 18% | 1e-05 | 40.82% | 766  |                |

### *Top aligned sequence of Entamoeba histolytica*

>XP\_655361.1 Rho guanine nucleotide exchange factor, putative [Entamoeba histolytica HM-1:IMSS]  
MSKRLYVVNEIVSTEESYARALQTVVDLYITPLKGMDLISEEDMKGLFCNLEELLGDGANQLTKQLKDRLK  
EFALNDNICDVFLLNKPLFNRFGPYIQNYEKASLLFDKLSKKKKFEEFCETQKENPLSNNGNLMSFLIFP  
VQRIIPRYILLMKEYIKNTEKDHDAVIAEQVRRYLDSYAKAVNAIIANENNKQKMRDIIKMFTDLDPKTE  
NDLKTLPRTLVRREGILRKQCRKAVKERYFYLFNDATVIYGEQQGKKIQFHQLLELTSVKDIEDSDISQNG  
FQLKGLQKSVVYAETFDEKKEWMDLNKAFTGERKYEFEELSDNEAAPTWIPDDNVLDCMNCHSKFTL  
LNRHHCKRKCGRVLC AECTKRRVVI PHISSKPVRVCENCATKFENKDFEGVDDNSEHVNANGVAPPSLPN  
IPPPQRKQLIKISAMYPTLQPPSREPPPELPQYESY

### *Top aligned sequence of Leishmania major*

>XP\_003722823.1 conserved hypothetical protein [Leishmania major strain Friedlin]  
MSSSLSSPRPPQAEALPAPRGTI RFEDLGEPVQRLRLSLKGDVSEEDMALLEYVSVKDMAKIYSEMATDR  
HAEEIWQELRSALQARKEK IARREAE LAEKQRALEAEQEAEQRLRQQLEEEERERISAEEARQQRREER  
RRRKA EKA AAAAAAAAAEAEQAAAAAAAAEAEAAAAAAAAEETERQRKA EKRRKRREARARELQEEQDALTA E  
RARHETKKQKSLNQKDWSEFVQSHPLEY AQSETLDGAQQQLPAVIEQKELKHTLNAPPVSEQLLSRT  
YSPACGACGTRFDRPPPEWNC PMCERRYKVKVQVQPDMMENCMCKEPIGRWSRHHCRNCGRLVCANC  
SDKRAIIEDLGYDTPVRVCYDCFRLRS

*There were no sequences found from Giardia lamblia*

## Multiple Protozoan Sequence Alignment with Human Phafin2

|                      |                                                              |      |
|----------------------|--------------------------------------------------------------|------|
| Homo_sapiens (Human) | -----LKSP LNDM-----SDDDDD-----D-----DSSD-----                | 249  |
| XP_655361.1          | -----APP SLPNIPPPQRKQLIKI-----S-----AMYPTL-----              | 439  |
| XP_649382.1          | ENSEMSEAKGCTKEEFKIE---NTNDIIRDNEEAKAESTTLEESKDTEENNVM-----S  | 493  |
| XP_651719.1          | LDSISMESTSP L LK-----                                        | 441  |
| XP_651964.1          | QQKILSGGDINDSE--QND---DWQEF-----EDIEFDKQPSPRSL               | 489  |
| EMH78141.1           | -----                                                        | 460  |
| XP_655384.1          | -----                                                        | 492  |
| XP_656365.1          | RSPRMSKSEKKDKQ--DK-----K--KDKKKGKKSDSDNDNSQQT--KVV           | 464  |
| EMS15045.1           | QDQQLTSSSNDN--KKI---DVQPILQEE--SSNEQSTSDVENMNNNEQP---LE      | 583  |
| XP_651436.1          | QDQQLTSSSNDN--KKI---DVQPILQEE--SSNEQSTSDVENMNNNEQP---LE      | 583  |
| EMD43911.1           | QDQQLTSSSNDN--KKI---DVQPILQEE--SSNEQSTSDVENMNNNEQP---LE      | 452  |
| XP_656765.1          | IRRDCKRSNSVGNPEEIFD---GLSVILNPDIQRT---QTANILNNVENS KSPLGRSIG | 458  |
| XP_654401.1          | ---KDTTSSPALPEQSKQ---FNNPIH-----S---TNNTLSQEQT PSTIK--       | 483  |
| XP_651674.1          | -----PLPSIPPPRRKTPFIQ-----N-----ATQFKKREPPR--                | 425  |
| XP_651711.2          | --TIRMKSSKEDEIVLRL-----EGVNLTRVRS                            | 701  |
| EMS16071.1           | ENSEMSEAKGCTKEEFKIE---NTNDIIRDNEEAKAESTTLEESKDTEENNVM-----S  | 425  |
| 1Z2Q_A               | -----                                                        | 84   |
| XP_003722823.1       | -----                                                        | 377  |
| CAG9576238.1         | ---VLTTAGPGAPPVAAR---GQQDEGA-----GPTEPSTDDMNKPTSPLETP--      | 137  |
| XP_001684146.1       | ---VMDTYGHALLPLAGI---AKEPLKG-----G---ASADMKEPEKPSAAQ--       | 1896 |
| XP_656065.1          | -----                                                        | 395  |
| XP_001682467.1       | -----                                                        | 636  |
| XP_001687717.1       | QGLDVSSASSSALLPGPLP---VCS---D-----GNGHPPSNALTAPSAVTALP--     | 182  |
