# Supplementary material for: The PH Domain and C-Terminal polyD Motif of Phafin2 Exhibit a Unique Concurrence in Animals
Source: MDPI journal article supplement (doi:10.3390/membranes12070696), 2022-07-07
Supplement: s1 [file s1]

## Supplementary File S2: Multiple sequence alignment of the polyD region of human Phafin2 orthologues

|                                                             |                                                        |     |
|-------------------------------------------------------------|--------------------------------------------------------|-----|
| Homo_sapiens (Human)                                        | PARSDSYSQS-----LKSPLNMSDDDDDDSSD-----                  | 249 |
| Ficedula_albicollis (Collared_flycatcher)                   | STRSDSYSQS-----PKSPLNDSDDDDDEDSSD-----                 | 249 |
| Ciona_savignyi (Pacific_transparent_sea_squirt)             | PPQN-----NKLAFGDTSISDSESSDD---TRT-----                 | 254 |
| Latimeria_chalumnae (Coelacanth)                            | SKSDS-YRRS---PKSSI--DNVSEDEDEDSSD-----                 | 250 |
| Petromyzon_marinus (Sea_lamprey)                            | AGPL-----SSSSDDLSDDEDDDDDDDDGGD-----                   | 250 |
| Lepisosteus_oculatus (Spotted_gar)                          | ARSDS-YRSR----SKFPAPSVSDDDDDEDSSD-----                 | 248 |
| Myotis_lucifugus (Little_brown_bat)                         | PTRSDSYSQS-----LKSPLNDSDDDDDDSSD-----                  | 249 |
| Pongo_pygmaeus (Bornean_orangutan)                          | PARSDSYSQS-----LKSPLNMSDDDDDDSSD-----                  | 249 |
| Dichotomylctere_nigroviridis (Green_spotted_puffer)         | PRSDS-MSR----PAATFSSSNLCWDEGSSSSSD-----                | 246 |
| Pteropus_vampyrus (Large_flying_fox)                        | PTRSDSYSQS-----LKSPLNDSDDDDDDSSD-----                  | 249 |
| Loxodonta_africana (African_bush_elephant)                  | PTRSDSYSQS-----LKSPLNDSDDDDDDSSD-----                  | 249 |
| Procavia_capensis (Rock_hyrax)                              | -SRSDSYSQS-----LKSPLNDSDDDDDDSSD-----                  | 245 |
| Ciona_intestinalis (Vase_tunicate)                          | NVPN-----NKLAFGDTSYSSDSESN---EA-----                   | 258 |
| Gasterosteus_aculeatus (Three_spined_stickleback)           | ARSDS-LGR----LGSKFHN--MSDDDDDDSSD-----                 | 244 |
| Tursiops_truncatus (Bottlenose_dolphins)                    | PTRSDSYSQS-----LKSTLNDSDDDDDDSSD-----                  | 249 |
| Poecilia_formosa (Amazon_molly)                             | PRSES-MSR----PGANFNNTLSDDDDDDSSD-----                  | 245 |
| Mustela_putorius (Ferret)                                   | PTRSDSYSQS-----LKSPLNDSDDDDDDSSD-----                  | 249 |
| Otolemur_garnettii (Northern_greater_galago)                | PTRSDSYGQS-----LKSSLNDSDDDDDDSSD-----                  | 249 |
| Chlorocebus_sabaeus (Green_monkey)                          | PARSDSYSQS-----LKSPLNMSDDDDDDSSD-----                  | 249 |
| Dasypus_novemcinctus (Nine_banded_armadillo)                | PNRSDSYSQS-----LKSPLNDSDDDDDDSSD-----                  | 249 |
| Tupaia_belangeri (Northern_treeshrew)                       | PTRSDSYSQS-----LKSPLNDSDDDDDDSSD-----                  | 250 |
| Anolis_carolinensis (Carolina_anole)                        | SGRSDSYSQS-----LKPLNDISDDDDDDSSD-----                  | 249 |
| Pelodiscus_sinensis (Chinese_softshell_turtle)              | PTRSDSYSQS-----PKSPINDVSDDDDDDSSD-----                 | 249 |
| Ochotona_princeps (American_pika)                           | PARSDSYSQS-----LKSPLNDSDDDDDDSSD-----                  | 249 |
| Erinaceus_europaeus (European_hedgehog)                     | PARSDSYSQS-----LKSPLNDSDDDDDDSSD-----                  | 249 |
| Vicugna_pacos (Alpaca)                                      | PARSDSYSQS-----LKSPLNDSDDDDDDSSD-----                  | 249 |
| Sorex_araneus (Common_shrew)                                | PTRSDSYSQS-----LKSPLNDSDDDDDDSSD-----                  | 249 |
| Choloepus_hoffmanni (Hoffmann's_two-toed_sloth)             | -----                                                  | 146 |
| Macropus_eugenii (Tamar_wallaby)                            | PSRSDSYSQS-----PKSPLNVSDDDDDEDSSD-----                 | 249 |
| Heterocephalus_glaber_1 (Naked_mole-rat)                    | PGRSDSYSQS-----LKSSLNVSDDDDDEDSSD-----                 | 248 |
| Heterocephalus_glaber_2 (Naked_mole-rat)                    | ARSDSVYSQS-----LKSSLNVSDDDDDDSSA-----                  | 239 |
| Chinchilla_lanigera (Long-tailed_chinchilla)                | PARSDSYSQS-----LKSPLNDSDDDDDDSSD-----                  | 248 |
| Cavia_porcellus (Guinea_pig)                                | PARSDSYSQS-----LKSPLNVSDDDDDDSSD-----                  | 248 |
| Ictidomys_tridecemlineatus (Thirteen-lined_ground_squirrel) | PTRSDSYSQS-----LKPLNDVSDDDDDDSSD-----                  | 249 |
| Heterocephalus_glaber (Naked_mole-rat)                      | ARSDSIYSQS-----LKSSLNVSDDDDDEDSSD-----                 | 235 |
| Rattus_norvegicus (Brown_rat)                               | PTRSDSYSQS-----LKSPLNDSDDDDDDSSD-----                  | 249 |
| Clethrionomys_glaberrimus (Vole)                            | PARSDSYSQS-----LKPLNDVSDDDDDDSSD-----                  | 249 |
| Cricetulus_griseus (Chinese_hamster)                        | PTRSDSYSQS-----LKSPLNDSDDDDDDSSD-----                  | 249 |
| Cercopithecus_atys (Sooty_mangabey)                         | PARSDSYSQS-----LKSPLNMSDDDDDDSSD-----                  | 249 |
| Cebus_imitator (White-faced_capuchin)                       | PARSDSYSQS-----LKSPLNMSDDDDDDSSD-----                  | 249 |
| Macaca_nemestrina (Southern_pig-tailed_macaque)             | PARSDSYSQS-----LKSPLNMSDDDDDDSSD-----                  | 249 |
| Nomascus_leucogenys (Northern_white-cheeked_gibbon)         | PARSDSYSQS-----LKSPLNDSDDDDDDSSD-----                  | 249 |
| Capra_aegagrus (Goat)                                       | PARSDSYSQS-----LQPLNDVSDDDDDDSSD-----                  | 249 |
| Sorex_araneus (Shrews)                                      | PTRSDSYSQS-----LKSPLNDSDDDDDDSSD-----                  | 249 |
| Mus_spretus (Algerian_mouse)                                | PTRSDSYSQS-----LKSPLNDSDDDDDDSSD-----                  | 249 |
| Mus_caroli (Ryukyu_mouse)                                   | PTRSDSYSQS-----LKSPLNDSDDDDDDSSD-----                  | 249 |
| Eptatretus_burgeri (Inshore_hagfish)                        | -----TSRRGSDGPVPCGGL--DSSDEDSSDGGEEIGSSLPGYTTDFYS----- | 266 |

|                                                         |                          |                            |     |
|---------------------------------------------------------|--------------------------|----------------------------|-----|
| Panthera_tigris (Tiger)                                 | PTRSDSYSQS-----LKSPNDVS  | DDDDDDSSD                  | 249 |
| Danio_reio (Zebrafish)                                  | PRSDS-YSRQ----GSDFGSNNIS | DDDDDDSSD                  | 247 |
| Cyprinodon_variegatus (Sheepshead_minnow)               | PRSDS-ITR----PGANFNNTLS  | DEDEDDSSD                  | 245 |
| Amphilophus_citrinellus (Midas_cichlid)                 | QHSdT-ITR----PGSKFNSNLS  | DDDDDDSSD                  | 246 |
| Oryzias_dancena (Indian_medaka)                         | PRSDS-NNW----GESRYNNNHL  | DEDEDDSSD                  | 281 |
| Stegastes_partitus (Bicolor_damselfish)                 | PRSDS-ISR-----SKFNSNLS   | DEDEDDSSD                  | 244 |
| Amphiprion_percula (Orange_clownfish)                   | PRSDS-ISR-----PGSKFNSNLS | DEDEDDSSD                  | 246 |
| Fundulus_heteroclitus (Mummichog)                       | PNADS-LSR----PGLNFNNTL   | DDDDDDSSD                  | 244 |
| Maylandia_zebra (Zebra_mbuna)                           | RSDSI-TRP-----GSKFHSNLS  | DDDDDDSSD                  | 245 |
| Astatotilapia_calliptera (Eastern_happy)                | RSDSI-TRP-----GSKFHSNLS  | DDDDDDSSD                  | 245 |
| Oryzias_latipes (Japanese_rice_fish)                    | PCSDS-NSW----SESRYNNNHL  | DEDEDDSSD                  | 246 |
| Amphiprion_ocellaris (Clownfish)                        | PRSDS-ISR-----PGSKFNSNLS | DEDEDDSSD                  | 246 |
| Xiphophorus_maculatus (Southern_platyfish)              | RQSES-MSR----SGANFNNTL   | DDDDDDSSD                  | 244 |
| Neolamprologus_brichardi (Lyretail_cichlid)             | RSDSI-TRP-----GSKFHSNLS  | DDDDDDSSD                  | 245 |
| Scophthalmus_maximus (Turbot)                           | VRSDS-FGR----MGSKFNN--LS | DDDEDDSSD                  | 244 |
| Pundamilia_nyererei (Makobe_Island_cichlid)             | RSDSI-TRP-----GSKFHSNLS  | DDDDDDSSD                  | 245 |
| Vulpes_vulpes (Red_fox)                                 | PARSDSYSQS-----LKSPNDVS  | DDDDDDSSD                  | 249 |
| Gallus_gallus (Chicken)                                 | STRSDSYSQS-----PKSSLNDAS | DDDDDESSD                  | 249 |
| Sphenodon_punctatus (Tuatara)                           | PTRSDSYSQS-----PKSPLNVS  | DDDDDDSSD                  | 249 |
| Equus_asinus (Donkey)                                   | PPRSDTYSQS-----LKSPLNVS  | DDDDDDSSD                  | 249 |
| Notechis_scutatus (Tiger_snakes)                        | PTRSDSFSQS-----PKPPLNDIS | DDDDDDSSD                  | 249 |
| Phascolarctos_cinereus (koala)                          | PTRSDSYSQS-----PKSPLNVS  | DEDEDDSSD                  | 249 |
| Bos_mutus (Wild_yak)                                    | PARSDSYSQS-----LKPPLNVS  | DDDDDDSSD                  | 249 |
| Anser_brachyrhynchus (Pink-footed_goose)                | STRSDSYSQS-----PKSSLNDAS | DDDDDESSD                  | 249 |
| Mus_spicilegus (Steppe_mouse)                           | PARSDSYSQS-----LKSPLNDS  | DDDDDDSSD                  | 249 |
| Neovison_vison (American_mink)                          | PTRSDSYSQS-----LKSPLNVS  | DDDDDDSSD                  | 249 |
| Chelonoidis_abingdonii (Abingdon_island_giant_tortoise) | PTRSDSYSQS-----PKSPLNVS  | DDDDDDSSD                  | 249 |
| Peromyscus_maniculatus (Northern_American_deer_mouse)   | PTRSDSYSQS-----LKSPLNVS  | DDDDDDSSD                  | 249 |
| Parus_major (Great_tit)                                 | SSRSDSYSQS-----PKSSLNDVS | DDDDDESSD                  | 249 |
| Crocodylus_porosus (Australian_saltwater_crocodile)     | PTRSDSYSQS-----PKSSLNDIS | DDDDDDSSD                  | 250 |
| Coturnix_japonica (Japanese_quail)                      | STRSDSYSQS-----PKSSLNDAS | DDDDDESSD                  | 249 |
| Bos_taurus (Cattle)                                     | PARSDSYSQS-----LKPPLNVS  | DDDDDDSSD                  | 249 |
| Electrophorus_electricus (Electric_eel)                 | PRSNS-YSRQ---PCS---TNVS  | DDDEDDSSD                  | 244 |
| Callorhynchus_milii (Elephant_shark)                    | NRSEF-YHGA-----LQSPGNLS  | DEDEDDSSD                  | 248 |
| Caenorhabditis_elegans (Roundworm)                      | -----KTGNRLHEDSSSDSE     | EVNGSGRSSNESRPTFYREDVQQPAT | 266 |
| Bos_taurus (Hybrid_cattle)                              | PARSDSYSQS-----LKPPLNVS  | DDDDDDSSD                  | 249 |
| Aquila_chrysaetos (Golden_eagle)                        | STRSDSYSQS-----PKSSLNDVS | DDDDDESSD                  | 249 |
| Taeniopygia_guttata (Zebra_finch)                       | STRSDSYSQS-----PKSSLNDVS | DDDDDESSD                  | 249 |
| Strigops_habroptilus (Kakapo)                           | STRSDSYSQS-----PKSSLNDVS | DDDDDESSD                  | 249 |
| Jaculus_orientalis (Egyptian_jerboa)                    | TRSHS-LSLKSP             |                            | 183 |
| Prolemur_simus (Greater_bamboo_lemur)                   | PTRSDSYSQS-----LKSPLNVS  | DDDDDDSSD                  | 250 |
| Serinus_canaria (Common_canary)                         | STRSDSYSQS-----PKSSLNDVS | DDDDDESSD                  | 249 |
| Gorilla_gorilla (Western_lowland_gorilla)               | PARSDSYSQS-----LKSPLNDS  | DDDDDDSSD                  | 249 |
| Hippocampus_comes (Tiger_tail_seahorse)                 | ---DT-VCG-----RAGDFRVS   | DDDDDDSSD                  | 242 |
| Propithecus_coquereli (Coquerel's_sifaka)               | PTRSDSYSQS-----LKSPLNVS  | DDDDDDSSD                  | 249 |
| Poecilia_latipinna (Sailfin_molly)                      | PRSES-MSR----PGANFNNTLS  | DDDDDDSSD                  | 245 |
| Astyanax_mexicanus (Mexican_tetra)                      | VRSNS-YSRT---PTSKFLTNNVS | DDDEDDSSD                  | 248 |
| Aotus_nancymae_1 (Ma's_night_monkey)                    | PTRSDSYSQS-----LKSPLNDS  | DDDDDDSSD                  | 249 |
| Poecilia_reticulata (Guppy)                             | PRSES-MSR----PGANFNNTLS  | DDDDDDSSD                  | 245 |
| Pygocentrus_nattereri (Red-bellied_piranha)             | VRSNS-YSLL---PPSCKFGSNVS | DEDEDDSSD                  | 248 |
| Anas_platyrhynchos (Common_mallard)                     | SARPSGSSNR-----GIWRVEM-  |                            | 237 |

|                                                        |                                         |     |
|--------------------------------------------------------|-----------------------------------------|-----|
| Labris_bergylta (Ballan wrasse)                        | IRSDS-ISR----PGSKFNSSNMSDDDEDDSSD-----  | 338 |
| Aotus_nancymae_2 (Ma's night monkey)                   | PTRSDSYSQS-----LKSPINDMSDDDDDDSSD-----  | 249 |
| Spalax_galili (Upper Galilee Mountains blind mole-rat) | PARSDSYSQS-----LKSPINDVSDDDDDDDSSD----- | 249 |
| Chrysemys_picta (Western painted turtle)               | PTRSDSYSQS-----PKSPINDVSDDDDDDDSSD----- | 249 |
| Astatotilapia_burtoni (Burton's mouthbrooder)          | PQDCL-YS-----VILIQSEP-----              | 232 |
| Pan_troglodytes (Chimpanzee)                           | PARSDSYSQS-----LKSPINDMSDDDDDDSSD-----  | 249 |
| Bison_bison (American bison)                           | PARSDSYSQS-----LKSPINDVSDDDDDDDSSD----- | 249 |
| Saimiri_sciureus (Squirrel monkeys)                    | PARSDSYSQS-----LKSPINDMSDDDDDDSSD-----  | 249 |
| Ictalurus_punctatus (Channel catfish)                  | PRSNS-YSRT-----NNISEDEDEDSSD-----       | 241 |
| Papio_anubis (Olive baboon)                            | PARSDSYSQS-----LKSSLNDMSDDDDDDSSD-----  | 249 |
| Seriola_lalandi (Yellowtail amberjack)                 | PRSDS-ISR----PGSKFN--NLSDDDEDSSD-----   | 244 |
| Mesocricetus_auratus (Golden hamster)                  | PARSDSYSQS-----LKSPINDVSDDDDDDDSSD----- | 249 |
| Ursus_maritimus (Polar bear)                           | PTRSDSYSQS-----LKSPINDVSDDDDDDDSSD----- | 249 |
| Seriola_dumerili (Greater amberjack)                   | PRSDS-ISR----PGSKFN--NLSDDDEDSSD-----   | 244 |
| Marmota_marmota (Alpine marmot)                        | PTRSDSYSQS-----LKSPINDVSDDDDDDDSSD----- | 249 |
| Rhinopithecus_roxellana (Golden snub-nosed monkey)     | PARSDSYSQS-----LKSPINDMSDDDDDDSSD-----  | 249 |
| Paramormyrops_batesii (Paramormyrops)                  | ARSDS-YSLS---S-NKFCGNNMSDDEDEDSSD-----  | 252 |
| Rhinopithecus_bieti (Black snub-nosed monkey)          | PARSDSYSQS-----LKSPINDMSDDDDDDSSD-----  | 249 |
| Microcebus_murinus (Gray mouse lemur)                  | PTRSDSYSQS-----LKSPINDVSDDDDDDDSSD----- | 249 |
| Panthera_pardus (Leopard)                              | PTRSDSYSQS-----LKSPINDVSDDDDDDDSSD----- | 249 |
| Hucho_hucho_1 (Huchen)                                 | PRSDS-YSRS-----VSKFNNVSDDEDEDSSD-----   | 248 |
| Geospiza_fortis (Medium ground finch)                  | STRSDSYSQS-----PKSSLNDVSDDDDEEDSSD----- | 249 |
| Hucho_hucho_2 (Huchen)                                 | PRSDS-YSRS-----GSKFNNVSDDEDEDSSD-----   | 253 |
| Ursus_americanus (American black bear)                 | PTRSDSYSQS-----LKSPINDVSDDDDDDDSSD----- | 249 |
| Symphurus_thermophilus (Tonguefish)                    | PRSDS-IGR---PGLKFGNNTLDDDDDDSSD-----    | 243 |
| Octodon_degus_1 (Common degu)                          | PAWSDSYSQS-----VKSPINDVSDDEEDSSD-----   | 248 |
| Dipodomys_ordii (Ord's kangaroo rat)                   | PTRSDSYSQS-----LKSPINDGSDDDDDDDSSD----- | 249 |
| Mandrillus_leucophaeus (Drill)                         | PARSDSYSQS-----LKSPINDMSDDDDDDSSD-----  | 249 |
| Octodon_degus_2 (Common degu)                          | ARSDS-YSQS-----LKSPINDVSDDEEDDNEKN----- | 234 |
| Kryptolebias_marmoratus (Mangrove rivulus)             | PRSDS-IT----LGPNFNNNTLSDDDDDDSSD-----   | 245 |
| Acanthochromis_polyacanthus (Spiny chromis)            | PRSDS-ISR----PGSKFN--NLSDDDEDSSD-----   | 244 |
| Pan_paniscus (Bonobo)                                  | PARSDSYSQS-----LKSPINDMSDDDDDDSSD-----  | 249 |
| Sinocyclocheilus_grahami_1 (Golden-line barbel)        | SHSDS-YSHP-----EISSNNISDDDDDDSSD-----   | 245 |
| Lates_calcarifer (Barramundi)                          | PRSDS-MSR----LGSKFNSNNLSDDDEDSSD-----   | 246 |
| Sinocyclocheilus_grahami_2 (Golden-line barbel)        | SHSDS-YSR-----SEFSSNNISDDDDDDSSD-----   | 245 |
| Carlito_syrichta (Philippine tarsier)                  | PTRSDSYSQS-----LKSPINDVSDDDDDDDSSD----- | 249 |
| Canis_lupus (Dingo)                                    | PARSDSYSQS-----LKSPINDVSDDDDDDDSSD----- | 249 |
| Cyclopterus_lumpus (Lumpfish)                          | PRSDS-LSR----LGSKFNN--LSDDDEDSSD-----   | 244 |
| Sander_lucioperca (Zander)                             | QRSDS-ISR----LGSKFNN--LSDDDDDDSSD-----  | 244 |
| Nothobranchius_furzeri (Turquoise killifish)           | PH-DS-ISR-----PTSNFNNNTLSDDDDDDSSD----- | 245 |
| Monodon_monoceros (Narwhal)                            | PTRSDSYSQS-----LKSTLNDVSDDDDDDDSSD----- | 249 |
| Cervus_elaphus_1 (Yarkand deer)                        | PARSDSYSQS-----LKPPINDVSDDDDDDDSSD----- | 249 |
| Cervus_elaphus_2 (Yarkand deer)                        | ARSDS-YSQS-----LKPPINDVSDDDSSD-----     | 233 |
| Balaenoptera_musculus (Blue whale)                     | PTRSDSYSQS-----SKSPINDVSDDDDDDDSSD----- | 249 |
| Leptobrachium_leishanense (Leishan spiny toad)         | GRSDS-LSSS---PK---FGHNLSNDDDDDSSD-----  | 247 |
| Naja_naja (Indian cobra)                               | PTRSDSFSQS-----PKPPINDISDDDDDDSSD-----  | 249 |
| Phocoena_sinus (Vaquita)                               | PTRSDSYSQS-----LKSTLNDVSDDDDDDDSSD----- | 249 |
| Sciurus_vulgaris_1 (Eurasian red squirrel)             | PTRSDSYSQS-----SKSPINDVSDDDDDDDSSD----- | 249 |
| Oncorhynchus_kisutch (Coho salmon)                     | PHSDS-YSRS-----GSKFNNVSDDEDEDSSD-----   | 254 |
| Sciurus_vulgaris_2 (Eurasian red squirrel)             | PTRSDSYSQS-----SKSPINNVSDDDDDDSSD-----  | 248 |
| Terrapene_carolina (Three-toed box turtle)             | PTRSDSYSQS-----PKSPINDVSDDDDDDDSSD----- | 249 |

|                                                   |                           |                                     |     |
|---------------------------------------------------|---------------------------|-------------------------------------|-----|
| Salmo_salar_1_(Atlantic_salmon)                   | PRSDS-YSRS-----GSKFNNVS   | DDEDEEDSSD                          | 248 |
| Catagonus_wagneri(Chacoan_peccary)                | PTRSDSYSQS-----LKAPLNDVS  | DDDDDDSSD                           | 249 |
| Pseudonaja_textilis(Eastern_brown_snake)          | PTRSDSFSQS-----PKPPLNDIS  | DDDDDDSSD                           | 249 |
| Tetraodontidae(Fugu)                              | PRSDS-LSR----PGSKFNTSNLS  | DDDDDDSSD                           | 246 |
| Moschus_moschiferus(Siberian_musk_deer)           | PARSDSYSQS-----LKPLNDVS   | DDDDDDSSD                           | 249 |
| Equus_caballus(Horse)                             | PPRSDTYSQS-----LKSPLNDVS  | DDDDDDSSD                           | 249 |
| Salmo_salar_2_(Atlantic_salmon)                   | PRSDS-YSRS-----GSKFNNVS   | DDEDEEDSSD                          | 248 |
| Larimichthys_crocea(Large_yellow_croaker)         | PRSDS-ISR----PGSKFN--NLS  | DDDEEDSSD                           | 244 |
| Cottoperca_gobio(Channel_bull_blenny)             | PRSDS-ITR----LGSKFN--NLS  | DDDEEDSSD                           | 242 |
| Xenopus_tropicalis(Western_clawed_frog)           | SRSDS-FSHP---SK---SKNNLS  | DDDDDESSD                           | 248 |
| Sus_scrofa(Pig)                                   | PTRSDSYSQS-----LKSPLNDVS  | DDDDDDSSD                           | 249 |
| Erpetoichthys_calabaricus(Reedfish)               | TRSDS-YSRA-----SKFSTNNMS  | DDDDDDSSD                           | 249 |
| Sparus_aurata(Gilt-head_bream)                    | PRSDS-ISR----PGSKFNSNNLS  | DDDEEDSSD                           | 246 |
| Struthio_camelus(Ostrich)                         | STRSDSYSQS-----PKSPLNDVS  | DDEDEEDSSD                          | 249 |
| Salmo_trutta_1_(Brown_trout)                      | PRSDS-YSRS-----GSKFNNVS   | DDEDEEDSSD                          | 255 |
| Panthera_leo(Lion)                                | PTRSDSYSQS-----LKSPLNDVS  | DDDDDDSSD                           | 249 |
| Camelus_dromedarius(Arabian_camel)                | PARSDSYSQS-----LKSPLNDVS  | DDDDDDSSD                           | 249 |
| Denticeps_clupeoides(Denticle_herring)            | PRSDS-YSRP----RSNFGSNNVS  | EDDDDDSSD                           | 247 |
| Ornithorhynchus_anatinus(Platypus)                | PTRSDSYSQS-----PKSPLNNTS  | DDDDDDSSD                           | 249 |
| Macaca_mulatta(Macaque)                           | PARSDSYSQS-----LKSPLNDMS  | DDDDDDSSD                           | 249 |
| Oreochromis_niloticus(Nile_tilapia)               | ARSDS-ITR----GSKFHSNNLS   | DDDDDDSSD                           | 245 |
| Monodelphis_domestica(Gray_short-tailed_opossums) | PTRSDSYSQS-----PKS-LNNVS  | DDEDEEDSSD                          | 543 |
| Cyprinus_carpio_1_(Common_carp)                   | --SDS-YSH-----SEISGNNIS   | DDDDDDSSD                           | 237 |
| Callithrix_jacchus(Common_marmoset)               | PARSDSYSQS-----LKSPLNDMS  | DDDEEDSSD                           | 249 |
| Cyprinus_carpio_2_(Common_carp)                   | ARSDS-YSR-----SEFSSNNIS   | DDDDDDSSD                           | 245 |
| Scleropages_formosus(Asian_arowana)               | PRSDS-YSRS---S-SRFPGSNV   | EDEEEEDSSD                          | 250 |
| Oryzias_sinensis(Chinese_rice_fish)               | PCSDS-NNW----SESRYNNHLS   | DDEDEEDSSD                          | 246 |
| Clupea_harengus(Atlantic_herring)                 | GRPDP-YGRS-----PGNNVS     | DDDEEDSSD                           | 244 |
| Gopherus_evgoodei(Goode's_thornscrub_tortoise)    | PTRSDSYSQS-----PKSPLNDVS  | DDDDDDSSD                           | 249 |
| Physeter_macrocephalus(Sperm_whale)               | PARSDSYSRS-----LKSPLNDVS  | DDDDDDSSD                           | 249 |
| Laticauda_laticaudata(blue-lipped_sea_krait)      | PTRSDSFSQS-----PKPPLNDIS  | DDDDDDSSD                           | 249 |
| Podarcis_muralis(Common_wall_lizard)              | PTRSDSYSHP-----PKLPLNDMS  | DDDDDDSSD                           | 249 |
| Delphinapterus_leucas(Beluga_whale)               | PTRSDSYSQS-----LKSTLNDVS  | DDDDDDSSD                           | 249 |
| Oncorhynchus_tshawytscha_1_(Chinook_salmon)       | PRSDS-YSRS-----GSKFNNVS   | DDEDEEDSSD                          | 307 |
| Betta_splendens(Siamese_fighting_fish)            | PRSEC-ISR----PGSKFNNDNL   | DEEEEDSSD                           | 277 |
| Oncorhynchus_mykiss_1_(Rainbow_trout)             | S-HVT-WSTY-----SFQYFR--   | -----                               | 235 |
| Oncorhynchus_mykiss_2_(Rainbow_trout)             | PRSDS-YSRS-----GSKFNNVS   | DDEDEEDSSD                          | 248 |
| Salmo_trutta_2_(Brown_trout)                      | PRSDS-YSRS-----GSKFNNVS   | DDEDEEDSSD                          | 248 |
| Dicentrarchus_labrax(European_bass)               | PRSDS-IGR----PVSKFNSNNLS  | DDDEEDSSD                           | 246 |
| Oryzias_javanicus(Javanese_Ricefish)              | PRSDS-NNW----AESRYNNHLS   | DDEDEEDSSD                          | 246 |
| Salmo_salar_3_(Atlantic_salmon)                   | L-----GKS-----NFFF--      | -----                               | 229 |
| Myripristis_murdjan(Pinecone_soldierfish)         | PRFDS-ISR----TGSKFNSNNVS  | DDEDEEDSSD                          | 248 |
| Sarcophilus_harrisii(Tasmanian_devil)             | PTRSDSYSQS-----TKSPLNNV   | DDEDEEDSSD                          | 249 |
| Carassius_auratus_1_(Goldfish)                    | SRSDS-L-----LSSNNIS       | DDDDDDSSD                           | 241 |
| Oncorhynchus_tshawytscha_2_(Chinook_salmon)       | PRSDS-YSRS-----GSKFNNVS   | DDEDEEDSSD                          | 253 |
| Carassius_auratus_2_(Goldfish)                    | --SGS-YTH-----LEISGNNIS   | DDDDDDSSD                           | 237 |
| Mus_musculus(Mouse)                               | PTRSDSYSQS-----LKSPLNDAS  | DDDDDDSSD                           | 249 |
| Gadus_morhua(Atlantic_cod)                        | QRADS-FGR-----QGFN-----LS | DDEDEEDSSD                          | 243 |
| Drosophila_melanogaster(Fruit_fly)                | -GEDS-AAATGAASGNKLNLT-TA  | DSSNDESDSETASPGGE-SHDEPRFYGDNSVLSAV | 276 |
| Ailuropoda_melanoleuca(Giant_panda)               | PTRSDSHSQS-----LKSPLNDVS  | DDDDDDSSD                           | 249 |
| Mastacembelus_armatus(Zig-zag_eel)                | PRSDS-ISR----PGSKFHSNNLS  | DDEDEEDSSD                          | 246 |

Macaca\_fascicularis (Crab-eating\_macaque)  
Anabas\_testudineus (Climbing\_perch)  
Felis\_catus (Cat)

|                         |                |     |
|-------------------------|----------------|-----|
| PARSDSYSQS-----LKSPLNDS | DDDDDDSSD----- | 249 |
| PRSDC-ISR-----SKFNSNNLS | DDEDEDSSD----- | 244 |
| PTRSDSYSQS-----LKSPLNDV | DDDDDDSSD----- | 249 |
