# Supplementary material for: The PH Domain and C-Terminal polyD Motif of Phafin2 Exhibit a Unique Concurrence in Animals
Source: MDPI journal article supplement (doi:10.3390/membranes12070696), 2022-07-07
Supplement: s1 [file s1]

**Supplementary File S3:** Details of different modules found in bacteria, archaea, fungi, plants, nonhuman mammals, and humans.

**Bacteria**

| <i>No</i> | <i>Accession No</i>            | <i>Modules</i>       |
|-----------|--------------------------------|----------------------|
| 1         | tr A0A1Y6CWR2 A0A1Y6CWR2_9GAMM | FYVE                 |
| 2         | tr A0A4Q5XUS2 A0A4Q5XUS2_9DELT | NO                   |
| 3         | tr A0A0A8E4G1 A0A0A8E4G1_9GAMM | FYVE                 |
| 4         | tr A0A2E9XWQ4 A0A2E9XWQ4_9RICK | VHS, FYVE            |
| 5         | tr A0A0G2ZPZ8 A0A0G2ZPZ8_9DELT | FYVE                 |
| 6         | tr A0A5C6VDZ7 A0A5C6VDZ7_9BURK | FYVE                 |
| 7         | tr A0A2E9LIA3 A0A2E9LIA3_9CHLR | FYVE,                |
| 8         | tr A0A2E4CAT1 A0A2E4CAT1_9ACTN | FYVE, PI3_PI4_Kinase |
| 9         | tr A0A4Q6X9R2 A0A4Q6X9R2_9BURK | FYVE                 |
| 10        | tr A0A158KI31 A0A158KI31_9BURK | FYVE                 |
| 11        | tr A0A2W4SQ66 A0A2W4SQ66_9GAMM | FYVE                 |
| 12        | tr A0A5J6QPA5 A0A5J6QPA5_9PSED | FYVE                 |
| 13        | tr A0A561P8H2 A0A561P8H2_XANCT | FYVE                 |
| 14        | tr A0A2E8LZD9 A0A2E8LZD9_9BACT | FYVE, PI3_PI4_kinase |
| 15        | tr A0A4R7ALIO A0A4R7ALIO_9GAMM | FYVE                 |
| 16        | tr A0A3L7RST6 A0A3L7RST6_9BACT | FYVE                 |
| 17        | tr A0A2E0WHK0 A0A2E0WHK0_9CHLR | FYVE, PI3_PI4_kinase |
| 18        | tr A0A1Z9KZ67 A0A1Z9KZ67_9SYNE | FYVE                 |
| 19        | tr A0A2E9LIE3 A0A2E9LIE3_9CHLR | FYVE, PI3_PI4_kinase |
| 20        | tr A0A3S3EH81 A0A3S3EH81_9PSED | FYVE                 |
| 21        | tr A0A0F4XPH7 A0A0F4XPH7_9PSED | FYVE                 |
| 22        | tr A0A657PDX6 A0A657PDX6_9PSED | FYVE                 |
| 23        | tr G8Q597 G8Q597_PSEF3         | FYVE                 |
| 24        | tr A0A2E0E560 A0A2E0E560_9RHOB | PI3_PI4_kinase       |
| 25        | tr A0A0C2EFB1 A0A0C2EFB1_9PSED | FYVE                 |
| 26        | tr A0A2E6VXV8 A0A2E6VXV8_9PROT | FYVE                 |
| 27        | tr A0A2D7RET3 A0A2D7RET3_9GAMM | PI3_PI4_kinase       |
| 28        | tr A0A4R7L8D8 A0A4R7L8D8_9GAMM | FYVE                 |

|    |                                |              |
|----|--------------------------------|--------------|
| 29 | tr A0A4R3YS80 A0A4R3YS80_9GAMM | FYVE         |
| 30 | tr A0A4Q3E3P0 A0A4Q3E3P0_9RICK | FYVE         |
| 31 | tr A0A0Q9PCH9 A0A0Q9PCH9_9GAMM | FYVE         |
| 32 | tr A0A2D5QHX0 A0A2D5QHX0_9GAMM | FYVE         |
| 33 | tr A0A239KKI8 A0A239KKI8_9PSED | FYVE, FYVE   |
| 34 | tr A0A2E8CGN4 A0A2E8CGN4_9DELT | FYVE         |
| 35 | tr A0A6I1NH92 A0A6I1NH92_9PSED | FYVE, FYVE   |
| 36 | tr A0A1E3GCQ5 A0A1E3GCQ5_9GAMM | FYVE         |
| 37 | tr A0A2A8BFD9 A0A2A8BFD9_9BACI | NO           |
| 38 | tr A0A484ZT69 A0A484ZT69_9GAMM | DsbB         |
| 39 | tr A0A2M7G853 A0A2M7G853_9BACT | Peptidase_S9 |
| 40 | tr A0A2C5DIR4 A0A2C5DIR4_9BACI | NO           |

### Archaea

| <i>No</i> | <i>Accession No</i>            | <i>Modules</i>   |
|-----------|--------------------------------|------------------|
| 1         | tr A0A482RXE8 A0A482RXE8_9ARCH | RhoGEF, PH, FYVE |
| 2         | tr A0A482S4E7 A0A482S4E7_9ARCH | FYVE             |
| 3         | tr A0A482RTS6 A0A482RTS6_9ARCH | FYVE             |
| 4         | tr A0A482UR88 A0A482UR88_9ARCH | FYVE             |
| 5         | tr A0A482R0G1 A0A482R0G1_9EURY | FYVE             |
| 6         | tr A0A482RYJ3 A0A482RYJ3_9ARCH | FYVE             |
| 7         | tr A0A482SL25 A0A482SL25_9ARCH | WW, FYVE         |
| 8         | tr A0A482SVI4 A0A482SVI4_9ARCH | FYVE             |
| 9         | tr A0A482ST03 A0A482ST03_9ARCH | FYVE             |
| 10        | tr A0A482R4B7 A0A482R4B7_9EURY | FYVE             |
| 11        | tr A0A482SVF7 A0A482SVF7_9ARCH | FYVE, Cpn60_TCP1 |
| 12        | tr A0A482SZF2 A0A482SZF2_9ARCH | Lipase_3, FYVE   |
| 13        | tr A0A482RGE2 A0A482RGE2_9ARCH | FYVE             |
| 14        | tr A0A482RTU5 A0A482RTU5_9ARCH | FYVE, Ank_2      |
| 15        | tr A0A482SG35 A0A482SG35_9ARCH | FYVE             |
| 16        | tr A0A482RW94 A0A482RW94_9ARCH | FYVE             |
| 17        | tr A0A482RV05 A0A482RV05_9ARCH | FYVE             |
| 18        | tr A0A482RVR9 A0A482RVR9_9ARCH | FYVE             |
| 19        | tr A0A482SAN9 A0A482SAN9_9ARCH | FYVE             |
| 20        | tr A0A482RAR6 A0A482RAR6_9ARCH | FYVE, Ank_4      |
| 21        | tr A0A482UQL2 A0A482UQL2_9ARCH | FYVE             |
| 22        | tr A0A482V091 A0A482V091_9ARCH | FYVE             |
| 23        | tr A0A482S307 A0A482S307_9ARCH | FYVE             |

|    |                                |                                                |
|----|--------------------------------|------------------------------------------------|
| 24 | tr A0A482SRA1 A0A482SRA1_9ARCH | PH, Ank_2, Ank_2                               |
| 25 | tr A0A482RXE5 A0A482RXE5_9ARCH | FYVE                                           |
| 26 | tr A0A482SVG8 A0A482SVG8_9ARCH | FYVE                                           |
| 27 | tr A0A482UVH9 A0A482UVH9_9ARCH | FYVE                                           |
| 28 | tr A0A482RQW7 A0A482RQW7_9ARCH | FYVE                                           |
| 29 | tr A0A3A5UT62 A0A3A5UT62_9EURY | CARDB                                          |
| 30 | tr A0A482UPW1 A0A482UPW1_9ARCH | Sec7                                           |
| 31 | tr A0A7C5RN86 A0A7C5RN86_9ARCH | HD, mCpol                                      |
| 32 | tr A0A7C4ZF49 A0A7C4ZF49_9ARCH | HD, mCpol                                      |
| 33 | tr A0A524F3J3 A0A524F3J3_9ARCH | dNK                                            |
| 34 | tr A0A7J2X8Y9 A0A7J2X8Y9_9EURY | zf-HYPE, zf-HYPE, Sua5_yciO_yrdC, HYPE_C, TsaD |
| 35 | tr A0A482RV58 A0A482RV58_9ARCH | PH                                             |
| 36 | tr A0A2E8V4G5 A0A2E8V4G5_9EURY | FG-GAP, TSP_3                                  |
| 37 | tr A0A7K4DTG4 A0A7K4DTG4_9ARCH | Diphthami_syn_2                                |
| 38 | tr H6Q7G6 H6Q7G6_PYROT         | zf-HIT                                         |
| 39 | tr A0A7J2XB36 A0A7J2XB36_9EURY | Prok-RING_4                                    |
| 40 | tr A0A662LIL0 A0A662LIL0_9EURY | Prok-RING_4                                    |
| 41 | tr A0A7L4PAM3 A0A7L4PAM3_9CREN | zf-HIT                                         |
| 42 | tr A4WL18 A4WL18_PYRAR         | zf-HIT                                         |
| 43 | tr A0A2D6X683 A0A2D6X683_9ARCH | NO                                             |
| 44 | tr A0A151E9R7 A0A151E9R7_9EURY | Sua5_yciO_yrdC                                 |
| 45 | tr A0A497EKV5 A0A497EKV5_9ARCH | zinc_ribbon_2                                  |
| 46 | tr A0A482SQW3 A0A482SQW3_9ARCH | FYVE                                           |
| 47 | tr A0A2E5RC13 A0A2E5RC13_9EURY | Ribosomal_L37ae                                |
| 48 | tr A0A2E9DYS3 A0A2E9DYS3_9EURY | VCBS                                           |
| 49 | tr A0A524DJL4 A0A524DJL4_9ARCH | dNK                                            |
| 50 | tr A0A497HLC9 A0A497HLC9_9EURY | HATPase_c                                      |
| 51 | tr A0A7C4S6U6 A0A7C4S6U6_9ARCH | Ribosomal_L34e                                 |
| 52 | tr A0A7J4LRK9 A0A7J4LRK9_9ARCH | DZR                                            |
| 53 | tr A0A7K4IJU2 A0A7K4IJU2_9ARCH | FYVE                                           |
| 54 | tr A0A2D9NJM7 A0A2D9NJM7_9EURY | FG-GAP                                         |
| 55 | tr A0A5A7S0K7 A0A5A7S0K7_9EURY | PIN_6                                          |
| 56 | tr A0A202E9J8 A0A202E9J8_9EURY | AAT                                            |
| 57 | tr A0A7J4TTH8 A0A7J4TTH8_9ARCH | DZR                                            |
| 58 | tr A0A2E6BWJ1 A0A2E6BWJ1_9EURY | DUF4428                                        |
| 59 | tr A0A7J4I1H7 A0A7J4I1H7_9ARCH | DZR                                            |
| 60 | tr A0A7C6DZH7 A0A7C6DZH7_9ARCH | mCpol                                          |
| 61 | tr A0A662JAF1 A0A662JAF1_9CREN | Prok-RING_4                                    |
| 62 | tr A0A151ENE1 A0A151ENE1_9EURY | Sua5_yciO_yrdC                                 |
| 63 | tr A0A2U3CK81 A0A2U3CK81_HEIAB | Topoisom_bac                                   |
| 64 | tr A0A2U9ILS6 A0A2U9ILS6_9CREN | RNA_POL_M_15KD                                 |
| 65 | tr A0A1V4YZZ9 A0A1V4YZZ9_9EURY | NO                                             |
| 66 | tr A0A0X8UZZ7 A0A0X8UZZ7_9EURY | HypA                                           |

|    |                                |                |
|----|--------------------------------|----------------|
| 67 | tr A0A1H6TIC6 A0A1H6TIC6_9EURY | Ribosomal_L40e |
| 68 | tr A0A7C0UA16 A0A7C0UA16_9ARCH | zf-B_box       |

### **Fungi**

| <b><i>No</i></b> | <b><i>Accession No</i></b>     | <b><i>Modules</i></b>  |
|------------------|--------------------------------|------------------------|
| 1                | tr A0A2Z6RA14 A0A2Z6RA14_9GLOM | RhoGEF, PH, FYVE       |
| 2                | tr A0A397VBS0 A0A397VBS0_9GLOM | RhoGEF, PH, FYVE       |
| 3                | tr A0A015IGQ3 A0A015IGQ3_RHIIW | RhoGEF, PH, FYVE       |
| 4                | tr A0A397TNA4 A0A397TNA4_9GLOM | RhoGEF, PH, FYVE       |
| 5                | tr A0A015KA47 A0A015KA47_RHIIW | RhoGEF, PH, FYVE       |
| 6                | tr A0A015IQ23 A0A015IQ23_RHIIW | RhoGEF, PH, FYVE       |
| 7                | tr A0A2I1G6N8 A0A2I1G6N8_9GLOM | RhoGEF, PH, FYVE       |
| 8                | tr A0A2I1F0G8 A0A2I1F0G8_9GLOM | RhoGEF, PH, FYVE       |
| 9                | tr U9SXZ4 U9SXZ4_RHIIID        | RhoGEF, PH, FYVE       |
| 10               | tr A0A372RFQ0 A0A372RFQ0_9GLOM | RhoGEF, PH, FYVE       |
| 11               | tr A0A4P9YZL8 A0A4P9YZL8_9FUNG | RhoGEF, PH, FYVE       |
| 12               | tr A0A4V1IX88 A0A4V1IX88_9FUNG | RhoGEF, PH, FYVE       |
| 13               | tr A0A4P9ZP44 A0A4P9ZP44_9FUNG | RhoGEF, PH, FYVE       |
| 14               | tr A0A0L0HGC7 A0A0L0HGC7_SPIPD | RhoGEF, PH, FYVE       |
| 15               | tr A0A177WRZ8 A0A177WRZ8_BATDL | RhoGEF                 |
| 16               | tr F4P650 F4P650_BATDJ         | RhoGEF                 |
| 17               | tr A0A1Y1X2T5 A0A1Y1X2T5_9FUNG | RhoGEF, PH, FYVE       |
| 18               | tr A0A507FBG2 A0A507FBG2_9FUNG | RhoGEF, FYVE           |
| 19               | tr A0A1Y1X1V7 A0A1Y1X1V7_9FUNG | RhoGEF, PH, FYVE       |
| 20               | tr A0A4V1IY93 A0A4V1IY93_9FUNG | RhoGEF, FYVE           |
| 21               | tr A0A1Y1X677 A0A1Y1X677_9FUNG | RhoGEF, PH, FYVE       |
| 22               | tr A0A137P479 A0A137P479_CONC2 | RhoGEF, PH, FYVE       |
| 23               | tr A0A507EFA4 A0A507EFA4_9FUNG | RhoGEF, PH, FYVE, FYVE |
| 24               | tr A0A507CXB0 A0A507CXB0_9FUNG | RhoGEF, FYV            |
| 25               | tr A0A1S8W822 A0A1S8W822_9FUNG | RhoGEF, FYVE           |
| 26               | tr A0A397IVX3 A0A397IVX3_9GLOM | RhoGEF, PH, FYVE       |
| 27               | tr A0A139AK54 A0A139AK54_GONPJ | NO                     |
| 28               | tr A0A4P9WLC0 A0A4P9WLC0_9FUNG | RhoGEF, FYVE           |
| 29               | tr A0A1Y1WA63 A0A1Y1WA63_9FUNG | RhoGEF, FYVE           |
| 30               | tr A0A0E9ND18 A0A0E9ND18_SAICN | RhoGEF, FYVE           |
| 31               | tr A0A2G5BFQ4 A0A2G5BFQ4_COERN | RhoGEF, FYVE           |
| 32               | tr A0A0W4ZGN5 A0A0W4ZGN5_PNEJ7 | RhoGEF, FYVE           |

|    |                                |                  |
|----|--------------------------------|------------------|
| 33 | tr A0A167MKJ0 A0A167MKJ0_CALVF | RhoGEF, FYVE     |
| 34 | tr A0A165DP15 A0A165DP15_9BASI | RhoGEF, FYVE     |
| 35 | tr M5FY58 M5FY58_DACPD         | RhoGEF, FYVE     |
| 36 | tr A0A1Y2IJD5 A0A1Y2IJD5_PYCCO | FYVE             |
| 37 | tr A0A1Y2IIH2 A0A1Y2IIH2_PYCCO | RhoGEF, FYVE     |
| 38 | tr A0A1Y2CRY6 A0A1Y2CRY6_9FUNG | FYVE             |
| 39 | tr M9MDT8 M9MDT8_PSEA3         | RhoGEF, FYVE     |
| 40 | tr A0A0L0SM81 A0A0L0SM81_ALLM3 | RhoGEF, FYVE     |
| 41 | tr A0A1M2VA80 A0A1M2VA80_TRAPU | RhoGEF, FYVE     |
| 42 | tr A0A2H3IXF5 A0A2H3IXF5_WOLCO | RhoGEF, FYVE     |
| 43 | tr A0A4Q9MH65 A0A4Q9MH65_9APHY | RhoGEF, FYVE     |
| 44 | tr A0A5E3XNR7 A0A5E3XNR7_9AGAM | RhoGEF, FYVE     |
| 45 | tr A0A5C3FP20 A0A5C3FP20_PSEA2 | RhoGEF, FYVE     |
| 46 | tr A0A081CEI2 A0A081CEI2_PSEA2 | RhoGEF, FYVE     |
| 47 | tr K5WQA6 K5WQA6_PHACS         | RhoGEF, FYVE     |
| 48 | tr A0A0H2S726 A0A0H2S726_9AGAM | RhoGEF, FYVE     |
| 49 | tr A0A165Z002 A0A165Z002_9AGAM | RhoGEF, FYVE     |
| 50 | tr A0A481SFP1 A0A481SFP1_9BASI | RhoGEF, PH, FYVE |
| 51 | tr A0A1Y1YYR8 A0A1Y1YYR8_9FUNG | PH, FYVE         |
| 52 | tr A0A4Q9NS61 A0A4Q9NS61_9APHY | RhoGEF, FYVE     |
| 53 | tr A0A4Q9Q5Q4 A0A4Q9Q5Q4_9APHY | RhoGEF, FYVE     |
| 54 | tr A0A5C3NHQ1 A0A5C3NHQ1_9AGAM | RhoGEF, FYVE     |
| 55 | tr A0A481SI77 A0A481SI77_9BASI | RhoGEF, PH, FYVE |
| 56 | tr S8FM81 S8FM81_FOMPI         | RhoGEF, FYVE     |
| 57 | tr A0A2G8SBX2 A0A2G8SBX2_9APHY | RhoGEF, FYVE     |
| 58 | tr A0A137NR99 A0A137NR99_CONC2 | FYVE             |
| 59 | tr A0A1Y1Z786 A0A1Y1Z786_9FUNG | FYVE             |
| 60 | tr A0A5C3ERJ4 A0A5C3ERJ4_9BASI | RhoGEF, PH, FYVE |
| 61 | tr A0A165BJR9 A0A165BJR9_9APHY | RhoGEF, FYVE     |
| 62 | tr A0A164UM97 A0A164UM97_9AGAM | RhoGEF, FYVE     |
| 63 | tr A0A0D7AXV4 A0A0D7AXV4_9AGAR | RhoGEF, FYVE     |
| 64 | tr A0A6A6HW15 A0A6A6HW15_9PLEO | VHS, FYVE        |
| 65 | tr A0A165L4G7 A0A165L4G7_9APHY | RhoGEF, FYVE     |
| 66 | tr A0A2N8UMQ8 A0A2N8UMQ8_9BASI | RhoGEF, PH, FYVE |
| 67 | tr V5GIZ1 V5GIZ1_KALBG         | RhoGEF, PH, FYVE |
| 68 | tr A0A2T2PC27 A0A2T2PC27_CORCC | VHS, FYVE        |
| 69 | tr A0A0L0HIX4 A0A0L0HIX4_SPIPD | FYVE             |
| 70 | tr A0A5C2U016 A0A5C2U016_9APHY | RhoGEF, FYVE     |
| 71 | tr A0A5C2SLU6 A0A5C2SLU6_9APHY | RhoGEF, FYVE     |

|     |                                |                  |
|-----|--------------------------------|------------------|
| 72  | tr A0A2R6PJ56 A0A2R6PJ56_9APHY | RhoGEF, FYVE     |
| 73  | tr A0A074RVC0 A0A074RVC0_9AGAM | RhoGEF, FYVE     |
| 74  | tr X8IWG9 X8IWG9_9AGAM         | RhoGEF, FYVE     |
| 75  | tr A0A067Q7F2 A0A067Q7F2_9AGAM | RhoGEF, FYVE     |
| 76  | tr E6ZVA4 E6ZVA4_SPORE         | RhoGEF, PH, FYVE |
| 77  | tr A0A3N4I9X6 A0A3N4I9X6_ASCIM | VHS, FYVE        |
| 78  | tr A0A0C3NH87 A0A0C3NH87_PHLGI | RhoGEF, FYVE     |
| 79  | tr A0A166A0Y0 A0A166A0Y0_9AGAM | RhoGEF, FYVE     |
| 80  | tr A0A0F7RZL7 A0A0F7RZL7_9BASI | RhoGEF, PH, FYVE |
| 81  | tr A0A6A5VUJ0 A0A6A5VUJ0_9PLEO | VHS, FYVE        |
| 82  | tr A0A6G6FQD5 A0A6G6FQD5_9APHY | RhoGEF, FYVE     |
| 83  | tr A0A0B7F915 A0A0B7F915_THACB | RhoGEF, FYVE     |
| 84  | tr Q8NIX4 Q8NIX4_USTMD         | RhoGEF, PH, FYVE |
| 85  | tr R9PB35 R9PB35_PSEHS         | RhoGEF, FYVE     |
| 86  | tr A0A077R837 A0A077R837_9BASI | RhoGEF, PH, FYVE |
| 87  | tr A0A0D1E146 A0A0D1E146_USTMA | RhoGEF, PH, FYVE |
| 88  | tr A0A1K0FWK6 A0A1K0FWK6_9BASI | RhoGEF, FYVE     |
| 89  | tr A0A4U7KNT8 A0A4U7KNT8_9BASI | RhoGEF, PH, FYVE |
| 90  | tr A0A4T0IBV4 A0A4T0IBV4_WALIC | RhoGEF, FYVE     |
| 91  | tr R9AV38 R9AV38_WALI9         | RhoGEF, FYVE     |
| 92  | tr A0A4T0J9U8 A0A4T0J9U8_WALIC | RhoGEF, FYVE     |
| 93  | tr I2FM96 I2FM96_USTH4         | RhoGEF, FYVE     |
| 94  | tr A0A177BYI1 A0A177BYI1_9PLEO | VHS, FYVE        |
| 95  | tr A0A5C3M448 A0A5C3M448_9AGAR | RhoGEF, FYVE     |
| 96  | tr A0A0W0G1I7 A0A0W0G1I7_9AGAR | RhoGEF, FYVE     |
| 97  | tr V2X232 V2X232_MONRO         | RhoGEF, FYVE     |
| 98  | tr A0A6A5UD68 A0A6A5UD68_9PLEO | VHS, FYVE        |
| 99  | tr A0A507ES66 A0A507ES66_9FUNG | RhoGEF, PH       |
| 100 | tr A0A0K6FN13 A0A0K6FN13_9AGAM | RhoGEF, FYVE     |
| 101 | tr A0A5M9KV80 A0A5M9KV80_9PLEO | VHS, FYVE        |
| 102 | tr A0A2W1CTG6 A0A2W1CTG6_9PLEO | VHS, FYVE        |
| 103 | tr A0A6S6V7N3 A0A6S6V7N3_9PLEO | VHS, FYVE        |
| 104 | tr B2W9Q9 B2W9Q9_PYRTR         | VHS, FYVE        |
| 105 | tr A0A316ZS75 A0A316ZS75_9PLEO | VHS, FYVE        |
| 106 | tr A0A6A6RWR3 A0A6A6RWR3_9PLEO | VHS, FYVE        |
| 107 | tr A0A1Y2AFM9 A0A1Y2AFM9_9FUNG | VHS, FYVE        |
| 108 | tr A0A1Y2GJ54 A0A1Y2GJ54_9FUNG | VHS, FYVE        |
| 109 | tr A0A316VEC8 A0A316VEC8_9BASI | RhoGEF, FYVE     |
| 110 | tr A0A6A5QBT9 A0A6A5QBT9_AMPQU | VHS, FYVE        |

|     |                                |                        |
|-----|--------------------------------|------------------------|
| 111 | tr A0A6A6ZW62 A0A6A6ZW62_9PLEO | VHS, FYVE              |
| 112 | tr A0A317XKP1 A0A317XKP1_9BASI | RhoGEF, PH, FYVE       |
| 113 | tr A0A5C3F116 A0A5C3F116_9BASI | RhoGEF, PH, FYVE       |
| 114 | tr A0A177WUX8 A0A177WUX8_BATDL | FYVE                   |
| 115 | tr F4P7P0 F4P7P0_BATDJ         | FYVE                   |
| 116 | tr A0A6A6V864 A0A6A6V864_9PLEO | FYVE                   |
| 117 | tr N1QHA6 N1QHA6_SPHMS         | VHS, FYVE              |
| 118 | tr A0A2V1DU97 A0A2V1DU97_9PLEO | VHS, FYVE              |
| 119 | tr A0A6A6TFR8 A0A6A6TFR8_9PLEO | VHS, FYVE              |
| 120 | tr A0A550CL33 A0A550CL33_9AGAR | RhoGEF, FYVE           |
| 121 | tr A0A284S9X6 A0A284S9X6_ARMOS | RhoGEF, FYVE           |
| 122 | tr A0A0C3Q7C3 A0A0C3Q7C3_9AGAM | RhoGEF, FYVE           |
| 123 | tr A0A367KQZ9 A0A367KQZ9_RHIST | VHS, FYVE              |
| 124 | tr A0A074VKM0 A0A074VKM0_9PEZI | VHS, FYVE              |
| 125 | tr R0ITW9 R0ITW9_SETT2         | VHS, FYVE              |
| 126 | tr A0A1Y2EN19 A0A1Y2EN19_9BASI | RhoGEF, FYVE           |
| 127 | tr A0A507BWX7 A0A507BWX7_9FUNG | RhoGEF, Glyco_hydro_47 |
| 128 | tr A0A6A6JKH9 A0A6A6JKH9_9PLEO | VHS, FYVE              |
| 129 | tr A0A3N4M7C5 A0A3N4M7C5_9PEZI | VHS, FYVE              |
| 130 | tr A0A6A5JXY0 A0A6A5JXY0_9PLEO | VHS, FYVE              |
| 131 | tr A0A6G1IPA9 A0A6G1IPA9_9PLEO | VHS, FYVE              |
| 132 | tr A0A0D7A3M6 A0A0D7A3M6_9AGAR | RhoGEF, FYVE           |
| 133 | tr A0A0C3B4B2 A0A0C3B4B2_9AGAM | RhoGEF, FYVE           |
| 134 | tr A0A067MUV1 A0A067MUV1_9AGAM | RhoGEF, FYVE           |
| 135 | tr A0A0P1BAI6 A0A0P1BAI6_9BASI | RhoGEF, FYVE           |
| 136 | tr A0A0D0C6Q8 A0A0D0C6Q8_9AGAR | RhoGEF, FYVE           |
| 137 | tr A0A197JU28 A0A197JU28_9FUNG | RhoGEF, FYVE, FYVE     |
| 138 | tr A0A178AI31 A0A178AI31_9PLEO | VHS, FYVE              |
| 139 | tr A0A316W3E2 A0A316W3E2_9BASI | RhoGEF, FYVE           |
| 140 | tr A0A316YEW3 A0A316YEW3_9BASI | RhoGEF, FYVE           |
| 141 | tr A0A1Y2GHB3 A0A1Y2GHB3_9FUNG | RhoGEF, FYVE, FYVE     |
| 142 | tr A0A6A4GV68 A0A6A4GV68_9AGAR | FYVE                   |
| 143 | sp O13821 VPS27_SCHPO          | VHS, FYVE              |
| 144 | tr A0A317T2J4 A0A317T2J4_9PEZI | VHS, FYVE              |
| 145 | tr A0A6S6WPJ0 A0A6S6WPJ0_9PLEO | VHS, FYVE              |
| 146 | tr E3RQL4 E3RQL4_PYRTT         | VHS, FYVE              |
| 147 | tr A0A0C9WXY8 A0A0C9WXY8_9AGAR | VHS, FYVE              |
| 148 | tr F8P7Z0 F8P7Z0_SERL9         | VHS, FYVE              |
| 149 | tr F8Q904 F8Q904_SERL3         | VHS, FYVE              |

|     |                                |                    |
|-----|--------------------------------|--------------------|
| 150 | tr A0A292PL22 A0A292PL22_9PEZI | VHS, FYVE          |
| 151 | tr A0A1Y1XKQ0 A0A1Y1XKQ0_9FUNG | VHS, FYVE          |
| 152 | sp Q0U4Z8 VPS27_PHANO          | VHS, FYVE          |
| 153 | tr A0A6A6D0R8 A0A6A6D0R8_9PEZI | VHS, FYVE          |
| 154 | tr A0A1Y1UY75 A0A1Y1UY75_9FUNG | Ank_2, Ank_2, FYVE |
| 155 | tr A0A6A6QQF5 A0A6A6QQF5_9PEZI | VHS, FYVE          |
| 156 | tr A0A168QCU4 A0A168QCU4_MUCCL | FYVE               |
| 157 | tr A0A0D2PBI9 A0A0D2PBI9_HYPSF | RhoGEF, FYVE       |
| 158 | tr U4LJ46 U4LJ46_PYROM         | VHS, FYVE          |
| 159 | tr A0A2T6ZAZ1 A0A2T6ZAZ1_TUBBO | VHS, FYVE          |
| 160 | tr A0A4U0WTC3 A0A4U0WTC3_9PEZI | VHS, FYVE          |
| 161 | tr A0A4S8LNE8 A0A4S8LNE8_DENBC | RhoGEF, FYVE       |
| 162 | tr A0A4V1IUA8 A0A4V1IUA8_9FUNG | VHS, FYVE          |
| 163 | tr L0P8I6 L0P8I6_PNEJ8         | FYVE               |
| 164 | tr R7Z380 R7Z380_CONA1         | VHS, FYVE          |
| 165 | tr E4ZXS6 E4ZXS6_LEPMJ         | VHS, FYVE          |
| 166 | tr A0A168Q840 A0A168Q840_MUCCL | VHS, FYVE          |
| 167 | tr A0A0C2S3H8 A0A0C2S3H8_AMAMU | RhoGEF, FYVE       |
| 168 | tr A0A0C9N4H5 A0A0C9N4H5_9FUNG | VHS, FYVE          |
| 169 | tr R4XHH8 R4XHH8_TAPDE         | VHS, FYVE          |
| 170 | tr A0A0B7NCZ8 A0A0B7NCZ8_9FUNG | FYVE               |
| 171 | tr A0A163F5K2 A0A163F5K2_DIDRA | VHS, FYVE          |
| 172 | tr A0A6A6YA67 A0A6A6YA67_9PEZI | VHS, FYVE          |
| 173 | tr A0A5C3KRI4 A0A5C3KRI4_9AGAR | RhoGEF, FYVE       |
| 174 | tr A0A0C2YUU7 A0A0C2YUU7_HEBCY | RhoGEF, FYVE       |
| 175 | tr G4T9B0 G4T9B0_SERID         | RhoGEF, FYVE       |
| 176 | tr A0A367JD28 A0A367JD28_RHIAZ | VHS, FYVE          |
| 177 | tr A0A367JX58 A0A367JX58_RHIAZ | VHS, FYVE          |
| 178 | tr A0A0M8MVG5 A0A0M8MVG5_9BASI | FYVE               |
| 179 | tr S2JXE4 S2JXE4_MUCC1         | VHS, FYVE          |
| 180 | tr A0A286USL7 A0A286USL7_9AGAM | RhoGEF, FYVE       |
| 181 | tr A0A067NSG1 A0A067NSG1_PLEOS | RhoGEF, FYVE       |
| 182 | tr A0A316ZLR8 A0A316ZLR8_9BASI | RhoGEF, FYVE       |
| 183 | tr A0A4T0G0A2 A0A4T0G0A2_9BASI | RhoGEF, FYVE       |
| 184 | tr A0A075ARC6 A0A075ARC6_ROZAC | FYVE               |
| 185 | tr A0A4V1IZA8 A0A4V1IZA8_ROZAC | FYVE               |
| 186 | tr A0A3M7M1P8 A0A3M7M1P8_9PLEO | VHS, FYVE          |
| 187 | tr D5GD30 D5GD30_TUBMM         | VHS, FYVE          |
| 188 | tr A0A1X7RQY2 A0A1X7RQY2_ZYMTR | VHS, FYVE          |



|     |                                |              |
|-----|--------------------------------|--------------|
| 189 | tr A0A1Y6LJF9 A0A1Y6LJF9_ZYMTR | VHS, FYVE    |
| 190 | tr A0A2H1GBB8 A0A2H1GBB8_ZYMTR | VHS, FYVE    |
| 191 | tr F9X9I8 F9X9I8_ZYMTI         | VHS, FYVE    |
| 192 | tr A0A6A6A070 A0A6A6A070_9PLEO | VHS, FYVE    |
| 193 | tr B0DJQ4 B0DJQ4_LACBS         | RhoGEF, FYVE |
| 194 | tr A0A369JTG7 A0A369JTG7_HYPMA | VHS, FYVE    |
| 195 | tr I4YHW0 I4YHW0_WALMC         | VHS, FYVE    |
| 196 | tr A0A507CTR3 A0A507CTR3_9FUNG | VHS, FYVE    |
| 197 | tr F4RZR0 F4RZR0_MELLP         | RhoGEF, FYVE |
| 198 | tr A0A4T0WVM5 A0A4T0WVM5_9ASCO | VHS, FYVE    |
| 199 | tr A0A150VI72 A0A150VI72_9PEZI | VHS, FYVE    |
| 200 | tr A0A3M6ZNS9 A0A3M6ZNS9_HORWE | VHS, FYVE    |
| 201 | tr A0A1Y1XRY0 A0A1Y1XRY0_9FUNG | PH, FYVE     |
| 202 | tr A0A074WRI8 A0A074WRI8_9PEZI | VHS, FYVE    |
| 203 | tr A0A6A7BU37 A0A6A7BU37_9PEZI | VHS, FYVE    |
| 204 | tr K1WTE0 K1WTE0_TRIAC         | VHS, FYVE    |
| 205 | tr J6EPC0 J6EPC0_TRIAS         | VHS, FYVE    |
| 206 | tr A0A3N4JEN9 A0A3N4JEN9_9PEZI | VHS, FYVE    |
| 207 | tr N1QCW3 N1QCW3_PSEFD         | VHS, FYVE    |
| 208 | tr M2STQ7 M2STQ7_COCH5         | VHS, FYVE    |
| 209 | tr N4X1G1 N4X1G1_COCH4         | VHS, FYVE    |
| 210 | tr A0A6A5SBR1 A0A6A5SBR1_9PLEO | VHS, FYVE    |
| 211 | tr A0A1Y2LUT7 A0A1Y2LUT7_EPING | VHS, FYVE    |
| 212 | tr E2LZL4 E2LZL4_MONPE         | FYVE         |
| 213 | tr A0A067S9R7 A0A067S9R7_GALM3 | RhoGEF, FYVE |
| 214 | tr L0PFS6 L0PFS6_PNEJ8         | FYVE         |
| 215 | tr F4NZK1 F4NZK1_BATDJ         | VHS, FYVE    |
| 216 | tr A0A3M7BVL5 A0A3M7BVL5_HORWE | VHS, FYVE    |
| 217 | tr A0A5J5F2H1 A0A5J5F2H1_9PEZI | VHS, FYVE    |
| 218 | tr A0A3M7GF14 A0A3M7GF14_HORWE | VHS, FYVE    |
| 219 | tr A0A3M7EI93 A0A3M7EI93_HORWE | VHS, FYVE    |
| 220 | tr A0A3M7A400 A0A3M7A400_HORWE | VHS, FYVE    |
| 221 | tr A0A162Y6D2 A0A162Y6D2_MUCCL | FYVE         |
| 222 | tr A0A4U0TZE6 A0A4U0TZE6_9PEZI | VHS, FYVE    |
| 223 | tr A0A3M7DFE3 A0A3M7DFE3_HORWE | VHS, FYVE    |
| 224 | tr A0A3M7C5L4 A0A3M7C5L4_HORWE | VHS, FYVE    |
| 225 | tr A0A1Z5SW51 A0A1Z5SW51_HORWE | VHS, FYVE    |
| 226 | tr A0A3M7IAA8 A0A3M7IAA8_HORWE | VHS, FYVE    |
| 227 | tr A0A1Y1ZMB2 A0A1Y1ZMB2_9PLEO | VHS, FYVE    |

|     |                                |              |
|-----|--------------------------------|--------------|
| 228 | tr A0A3M7EIE8 A0A3M7EIE8_HORWE | VHS, FYVE    |
| 229 | tr A0A3M7FRT0 A0A3M7FRT0_HORWE | VHS, FYVE    |
| 230 | tr A0A3M6WMK4 A0A3M6WMK4_HORWE | VHS, FYVE    |
| 231 | tr A0A0W4ZU85 A0A0W4ZU85_PNEJ7 | FYVE         |
| 232 | tr A0A409Y3I3 A0A409Y3I3_9AGAR | RhoGEF, FYVE |
| 233 | tr A0A1X0QT00 A0A1X0QT00_RHIZD | VHS, FYVE    |
| 234 | tr A0A2G4SSF8 A0A2G4SSF8_RHIZD | VHS, FYVE    |
| 235 | tr A0A4V4JT84 A0A4V4JT84_AURPU | VHS, FYVE    |
| 236 | tr A0A4S9NID1 A0A4S9NID1_AURPU | VHS, FYVE    |
| 237 | tr A0A4V4JPE1 A0A4V4JPE1_AURPU | VHS, FYVE    |
| 238 | tr A0A4S8U3P8 A0A4S8U3P8_AURPU | VHS, FYVE    |
| 239 | tr A0A4T0CLC8 A0A4T0CLC8_AURPU | VHS, FYVE    |
| 240 | tr A0A4S8XK24 A0A4S8XK24_AURPU | VHS, FYVE    |
| 241 | tr A0A4S9PXJ6 A0A4S9PXJ6_AURPU | VHS, FYVE    |
| 242 | tr A0A4S9S1G3 A0A4S9S1G3_AURPU | VHS, FYVE    |
| 243 | tr A0A4S9X121 A0A4S9X121_AURPU | VHS, FYVE    |
| 244 | tr A0A4S9MIC5 A0A4S9MIC5_AURPU | VHS, FYVE    |
| 245 | tr A0A4T0AAT4 A0A4T0AAT4_AURPU | VHS, FYVE    |
| 246 | tr A0A4V4LMX5 A0A4V4LMX5_AURPU | VHS, FYVE    |
| 247 | tr A0A4S9MD28 A0A4S9MD28_AURPU | VHS, FYVE    |
| 248 | tr A0A4S9SZX6 A0A4S9SZX6_AURPU | VHS, FYVE    |
| 249 | tr A0A4S8TGC0 A0A4S8TGC0_AURPU | VHS, FYVE    |
| 250 | tr A0A4S9BBL0 A0A4S9BBL0_AURPU | VHS, FYVE    |

### Plants

| <i>No</i> | <i>Accession No</i>            | <i>Modules</i>   |
|-----------|--------------------------------|------------------|
| 1         | tr A0A2Z6RA14 A0A2Z6RA14_9GLOM | RhoGEF, PH, FYVE |
| 2         | tr A0A397VBS0 A0A397VBS0_9GLOM | RhoGEF, PH, FYVE |
| 3         | tr A0A015IGQ3 A0A015IGQ3_RHIIW | RhoGEF, PH, FYVE |
| 4         | tr A0A397TNA4 A0A397TNA4_9GLOM | RhoGEF, PH, FYVE |
| 5         | tr A0A015KA47 A0A015KA47_RHIIW | RhoGEF, PH, FYVE |
| 6         | tr A0A015IQ23 A0A015IQ23_RHIIW | RhoGEF, PH, FYVE |
| 7         | tr A0A2I1G6N8 A0A2I1G6N8_9GLOM | RhoGEF, PH, FYVE |
| 8         | tr A0A2I1F0G8 A0A2I1F0G8_9GLOM | RhoGEF, PH, FYVE |

|    |                                |                       |
|----|--------------------------------|-----------------------|
| 9  | tr U9SXZ4 U9SXZ4_RHIID         | RhoGEF, PH, FYVE      |
| 10 | tr A0A372RFQ0 A0A372RFQ0_9GLOM | RhoGEF, PH, FYVE      |
| 11 | tr A0A4P9YZL8 A0A4P9YZL8_9FUNG | RhoGEF, PH, FYVE      |
| 12 | tr A0A4V1IX88 A0A4V1IX88_9FUNG | RhoGEF, PH, FYVE      |
| 13 | tr A0A4P9ZP44 A0A4P9ZP44_9FUNG | RhoGEF, PH, FYVE      |
| 14 | tr A0A0L0HGC7 A0A0L0HGC7_SPIPD | RhoGEF, PH, FYVE      |
| 15 | tr A0A177WRZ8 A0A177WRZ8_BATDL | RhoGEF, RhoGEF, FYVE  |
| 16 | tr F4P650 F4P650_BATDJ         | RhoGEF, FYVE          |
| 17 | tr A0A1Y1X2T5 A0A1Y1X2T5_9FUNG | RhoGEF, PH, FYVE      |
| 18 | tr A0A507FBG2 A0A507FBG2_9FUNG | RhoGEF, FYVE          |
| 19 | tr A0A1Y1X1V7 A0A1Y1X1V7_9FUNG | RhoGEF, FYVE, PH      |
| 20 | tr A0A4V1IY93 A0A4V1IY93_9FUNG | RhoGEF, FYVE          |
| 21 | tr A0A1Y1X677 A0A1Y1X677_9FUNG | RhoGEF, PH, FYVE      |
| 22 | tr A0A137P479 A0A137P479_CONC2 | RhoGEF, PH, FYVE      |
| 23 | tr A0A507EFA4 A0A507EFA4_9FUNG | RhoGEF, PH, FYVE, PH  |
| 24 | tr A0A507CXB0 A0A507CXB0_9FUNG | RhoGEF, FYVE          |
| 25 | tr A0A1S8W822 A0A1S8W822_9FUNG | RhoGEF, FYVE          |
| 26 | tr A0A397IVX3 A0A397IVX3_9GLOM | RhoGEF, PH, FYVE      |
| 27 | tr A0A139AK54 A0A139AK54_GONPJ | NO                    |
| 28 | tr A0A4P9WLC0 A0A4P9WLC0_9FUNG | RhoGEF, PH, FYVE      |
| 29 | tr A0A1Y1WA63 A0A1Y1WA63_9FUNG | RhoGEF, FYVE          |
| 30 | tr A0A0E9ND18 A0A0E9ND18_SAICN | RhoGEF, FYVE, Pex14_N |
| 31 | tr A0A2G5BFQ4 A0A2G5BFQ4_COERN | RhoGEF, PH, FYVE      |
| 32 | tr A0A0W4ZGN5 A0A0W4ZGN5_PNEJ7 | RhoGEF, FYVE          |
| 33 | tr A0A167MKJ0 A0A167MKJ0_CALVF | RhoGEF, FYVE          |
| 34 | tr A0A165DP15 A0A165DP15_9BASI | RhoGEF, FYVE          |
| 35 | tr M5FY58 M5FY58_DACPD         | RhoGEF, FYVE          |
| 36 | tr A0A1Y2IJD5 A0A1Y2IJD5_PYCCO | FYVE                  |
| 37 | tr A0A1Y2IIH2 A0A1Y2IIH2_PYCCO | RhoGEF, FYVE          |
| 38 | tr A0A1Y2CRY6 A0A1Y2CRY6_9FUNG | FYVE                  |
| 39 | tr M9MDT8 M9MDT8_PSEA3         | RhoGEF, FYVE          |
| 40 | tr A0A0L0SM81 A0A0L0SM81_ALLM3 | RhoGEF, FYVE          |
| 41 | tr A0A1M2VA80 A0A1M2VA80_TRAPU | RhoGEF, FYVE          |
| 42 | tr A0A2H3IXF5 A0A2H3IXF5_WOLCO | RhoGEF, FYVE          |
| 43 | tr A0A4Q9MH65 A0A4Q9MH65_9APHY | RhoGEF, FYVE          |
| 44 | tr A0A5E3XNR7 A0A5E3XNR7_9AGAM | RhoGEF, FYVE          |
| 45 | tr A0A5C3FP20 A0A5C3FP20_PSEA2 | RhoGEF, FYVE          |

|    |                                |                     |
|----|--------------------------------|---------------------|
| 46 | tr A0A081CEI2 A0A081CEI2_PSEA2 | RhoGEF, FYVE        |
| 47 | tr K5WQA6 K5WQA6_PHACS         | RhoGEF, FYVE        |
| 48 | tr A0A0H2S726 A0A0H2S726_9AGAM | RhoGEF, FYVE        |
| 49 | tr A0A165Z002 A0A165Z002_9AGAM | RhoGEF, FYVE        |
| 50 | tr A0A481SFP1 A0A481SFP1_9BASI | RhoGEF, PH, FYVE    |
| 51 | tr A0A1Y1YYR8 A0A1Y1YYR8_9FUNG | PH, FYVE            |
| 52 | tr A0A4Q9NS61 A0A4Q9NS61_9APHY | RhoGEF, FYVE        |
| 53 | tr A0A4Q9Q5Q4 A0A4Q9Q5Q4_9APHY | RhoGEF, FYVE        |
| 54 | tr A0A5C3NHQ1 A0A5C3NHQ1_9AGAM | RhoGEF, FYVE        |
| 55 | tr A0A481SI77 A0A481SI77_9BASI | RhoGEF, PH, FYVE    |
| 56 | tr S8FM81 S8FM81_FOMPI         | RhoGEF, FYVE        |
| 57 | tr A0A2G8SBX2 A0A2G8SBX2_9APHY | RhoGEF, FYVE        |
| 58 | tr A0A137NR99 A0A137NR99_CONC2 | FYVE                |
| 59 | tr A0A1Y1Z786 A0A1Y1Z786_9FUNG | FYVE                |
| 60 | tr A0A5C3ERJ4 A0A5C3ERJ4_9BASI | RhoGEF, PH, FYVE    |
| 61 | tr A0A165BJR9 A0A165BJR9_9APHY | RhoGEF, FYVE        |
| 62 | tr A0A164UM97 A0A164UM97_9AGAM | RhoGEF, FYVE        |
| 63 | tr A0A0D7AXV4 A0A0D7AXV4_9AGAR | RhoGEF, FYVE        |
| 64 | tr A0A6A6HW15 A0A6A6HW15_9PLEO | VHS, FYVE, UIM, UIM |
| 65 | tr A0A165L4G7 A0A165L4G7_9APHY | RhoGEF, FYVE        |
| 66 | tr A0A2N8UMQ8 A0A2N8UMQ8_9BASI | RhoGEF, PH, FYVE    |
| 67 | tr V5GIZ1 V5GIZ1_KALBG         | RhoGEF, PH, FYVE    |
| 68 | tr A0A2T2PC27 A0A2T2PC27_CORCC | VHS, FYVE, UIM, UIM |
| 69 | tr A0A0L0HIX4 A0A0L0HIX4_SPIPD | FYVE                |

|    |                                |                     |
|----|--------------------------------|---------------------|
| 70 | tr A0A5C2U016 A0A5C2U016_9APHY | RhoGEF, FYVE        |
| 71 | tr A0A5C2SLU6 A0A5C2SLU6_9APHY | RhoGEF, FYVE        |
| 72 | tr A0A2R6PJ56 A0A2R6PJ56_9APHY | RhoGEF, FYVE        |
| 73 | tr A0A074RVC0 A0A074RVC0_9AGAM | RhoGEF, FYVE        |
| 74 | tr X8IWG9 X8IWG9_9AGAM         | RhoGEF, FYVE        |
| 75 | tr A0A067Q7F2 A0A067Q7F2_9AGAM | RhoGEF, FYVE        |
| 76 | tr E6ZVA4 E6ZVA4_SPORE         | RhoGEF, PH, FYVE    |
| 77 | tr A0A3N4I9X6 A0A3N4I9X6_ASCIM | VHS, FYVE, UIM, UIM |
| 78 | tr A0A0C3NH87 A0A0C3NH87_PHLGI | RhoGEF, FYVE        |
| 79 | tr A0A166A0Y0 A0A166A0Y0_9AGAM | RhoGEF, FYVE        |
| 80 | tr A0A0F7RZL7 A0A0F7RZL7_9BASI | RhoGEF, PH, FYVE    |
| 81 | tr A0A6A5VUJ0 A0A6A5VUJ0_9PLEO | VHS, FYVE, UIM, UIM |
| 82 | tr A0A6G6FQD5 A0A6G6FQD5_9APHY | RhoGEF, FYVE        |
| 83 | tr A0A0B7F915 A0A0B7F915_THACB | RhoGEF, FYVE        |
| 84 | tr Q8NJX4 Q8NJX4_USTMD         | RhoGEF, PH, FYVE    |
| 85 | tr R9PB35 R9PB35_PSEHS         | RhoGEF, FYVE        |
| 86 | tr A0A077R837 A0A077R837_9BASI | RhoGEF, PH, FYVE    |

|     |                                |                     |
|-----|--------------------------------|---------------------|
| 87  | tr A0A0D1E146 A0A0D1E146_USTMA | RhoGEF, PH, FYVE    |
| 88  | tr A0A1K0FWK6 A0A1K0FWK6_9BASI | RhoGEF, FYVE        |
| 89  | tr A0A4U7KNT8 A0A4U7KNT8_9BASI | RhoGEF, PH, FYVE    |
| 90  | tr C A0A4T0IBV4_WALIC          | RhoGEF, PH, FYVE    |
| 91  | tr R9AV38 R9AV38_WALI9         | RhoGEF, FYVE        |
| 92  | tr A0A4T0J9U8 A0A4T0J9U8_WALIC | RhoGEF, FYVE        |
| 93  | tr I2FM96 I2FM96_USTH4         | RhoGEF, FYVE        |
| 94  | tr A0A177BYI1 A0A177BYI1_9PLEO | VHS, FYVE, UIM, UIM |
| 95  | tr A0A5C3M448 A0A5C3M448_9AGAR | RhoGEF, FYVE        |
| 96  | tr A0A0W0G1I7 A0A0W0G1I7_9AGAR | RhoGEF, FYVE        |
| 97  | tr V2X232 V2X232_MONRO         | RhoGEF, FYVE        |
| 98  | tr A0A6A5UD68 A0A6A5UD68_9PLEO | VHS, FYVE           |
| 99  | tr A0A507ES66 A0A507ES66_9FUNG | RhoGEF, PH          |
| 100 | tr A0A0K6FN13 A0A0K6FN13_9AGAM | RhoGEF, FYVE        |
| 101 | tr A0A5M9KV80 A0A5M9KV80_9PLEO | VHS, FYVE, UIM, UIM |
| 102 | tr A0A2W1CTG6 A0A2W1CTG6_9PLEO | VHS, FYVE, UIM, UIM |
| 103 | tr A0A6S6V7N3 A0A6S6V7N3_9PLEO | VHS, FYVE, UIM, UIM |

|     |                                |                     |
|-----|--------------------------------|---------------------|
| 104 | tr B2W9Q9 B2W9Q9_PYRTR         | VHS, FYVE, UIM, UIM |
| 105 | tr A0A316ZS75 A0A316ZS75_9PLEO | VHS, FYVE, UIM, UIM |
| 106 | tr A0A6A6RWR3 A0A6A6RWR3_9PLEO | VHS, FYVE, UIM, UIM |
| 107 | tr A0A1Y2AFM9 A0A1Y2AFM9_9FUNG | VHS, FYVE, UIM, UIM |
| 108 | tr A0A1Y2GJ54 A0A1Y2GJ54_9FUNG | VHS, FYVE, UIM      |
| 109 | tr A0A316VEC8 A0A316VEC8_9BASI | RhoGEF, FYVE        |
| 110 | tr A0A6A5QBT9 A0A6A5QBT9_AMPQU | VHS, FYVE, UIM, UIM |
| 111 | tr A0A6A6ZW62 A0A6A6ZW62_9PLEO | VHS, FYVE           |
| 112 | tr A0A317XKP1 A0A317XKP1_9BASI | RhoGEF, PH, FYVE    |
| 113 | tr A0A5C3F116 A0A5C3F116_9BASI | RhoGEF, PH, FYVE    |
| 114 | tr A0A177WUX8 A0A177WUX8_BATDL | FYVE                |
| 115 | tr F4P7P0 F4P7P0_BATDJ         | FYVE                |
| 116 | tr A0A6A6V864 A0A6A6V864_9PLEO | FYVE, UIM, UIM      |
| 117 | tr N1QHA6 N1QHA6_SPHMS         | VHS, FYVE, UIM, UIM |
| 118 | tr A0A2V1DU97 A0A2V1DU97_9PLEO | VHS, FYVE, UIM, UIM |
| 119 | tr A0A6A6TFR8 A0A6A6TFR8_9PLEO | VHS, FYVE, UIM, UIM |
| 120 | tr A0A550CL33 A0A550CL33_9AGAR | RhoGEF, FYVE        |

|     |                                |                                |
|-----|--------------------------------|--------------------------------|
| 121 | tr A0A284S9X6 A0A284S9X6_ARMOS | RhoGEF, FYVE                   |
| 122 | tr A0A0C3Q7C3 A0A0C3Q7C3_9AGAM | RhoGEF, FYVE                   |
| 123 | tr A0A367KQZ9 A0A367KQZ9_RHIST | VHS, FYVE, UIM,<br>Hrs_helical |
| 124 | tr A0A074VKM0 A0A074VKM0_9PEZI | VHS, FYVE, UIM, UIM            |
| 125 | tr R0ITW9 R0ITW9_SETT2         | VHS, FYVE, UIM, UIM            |
| 126 | tr A0A1Y2EN19 A0A1Y2EN19_9BASI | RhoGEF, FYVE                   |
| 127 | tr A0A507BWX7 A0A507BWX7_9FUNG | RhoGEF, Glyco_hydro_47         |
| 128 | tr A0A6A6JKH9 A0A6A6JKH9_9PLEO | VHS, FYVE, UIM, UIM            |
| 129 | tr A0A3N4M7C5 A0A3N4M7C5_9PEZI | VHS, FYVE, UIM, UIM            |
| 130 | tr A0A6A5JXY0 A0A6A5JXY0_9PLEO | VHS, FYVE, UIM, UIM            |
| 131 | tr A0A6G1IPA9 A0A6G1IPA9_9PLEO | VHS, FYVE, UIM, UIM            |
| 132 | tr A0A0D7A3M6 A0A0D7A3M6_9AGAR | RhoGEF, FYVE                   |
| 133 | tr A0A0C3B4B2 A0A0C3B4B2_9AGAM | RhoGEF, FYVE                   |
| 134 | tr A0A067MUV1 A0A067MUV1_9AGAM | RhoGEF, FYVE                   |
| 135 | tr A0A0P1BAI6 A0A0P1BAI6_9BASI | RhoGEF, FYVE                   |
| 136 | tr A0A0D0C6Q8 A0A0D0C6Q8_9AGAR | RhoGEF, FYVE                   |
| 137 | tr A0A197JU28 A0A197JU28_9FUNG | RhoGEF, FYVE, FYVE             |



|     |                                |                               |
|-----|--------------------------------|-------------------------------|
| 138 | tr A0A178AI31 A0A178AI31_9PLEO | VHS, FYVE, UIM, UIM           |
| 139 | tr A0A316W3E2 A0A316W3E2_9BASI | RhoGEF, FYVE                  |
| 140 | tr A0A316YEW3 A0A316YEW3_9BASI | RhoGEF, FYVE                  |
| 141 | tr A0A1Y2GHB3 A0A1Y2GHB3_9FUNG | RhoGEF, FYVE, FYVE            |
| 142 | tr A0A6A4GV68 A0A6A4GV68_9AGAR | FYVE                          |
| 143 | sp O13821 VPS27_SCHPO          | VHS, FYVE, UIM, UIM           |
| 144 | tr A0A317T2J4 A0A317T2J4_9PEZI | VHS, FYVE, UIM, UIM           |
| 145 | tr A0A6S6WPJ0 A0A6S6WPJ0_9PLEO | VHS, FYVE, UIM, UIM           |
| 146 | tr E3RQL4 E3RQL4_PYRTT         | VHS, FYVE, UIM, UIM           |
| 147 | tr A0A0C9WXY8 A0A0C9WXY8_9AGAR | RhoGEF, FYVE                  |
| 148 | tr F8P7Z0 F8P7Z0_SERL9         | RhoGEF, FYVE                  |
| 149 | tr F8Q904 F8Q904_SERL3         | RhoGEF, FYVE                  |
| 150 | tr A0A292PL22 A0A292PL22_9PEZI | VHS, FYVE, UIM, UIM           |
| 151 | tr A0A1Y1XKQ0 A0A1Y1XKQ0_9FUNG | VHS, FYVE, UIM, UIM           |
| 152 | sp Q0U4Z8 VPS27_PHANO          | VHS, FYVE, UIM                |
| 153 | tr A0A6A6D0R8 A0A6A6D0R8_9PEZI | VHS, FYVE, UIM, UIM           |
| 154 | tr A0A1Y1UY75 A0A1Y1UY75_9FUNG | Ank_2, Ank_2, FYVE, zf-RING_2 |

|     |                                |                     |
|-----|--------------------------------|---------------------|
| 155 | tr A0A6A6QQF5 A0A6A6QQF5_9PEZI | VHS, FYVE, UIM, UIM |
| 156 | tr A0A168QCU4 A0A168QCU4_MUCCL | FYVE                |
| 157 | tr A0A0D2PBI9 A0A0D2PBI9_HYPSF | RhoGEF, FYVE        |
| 158 | tr U4LJ46 U4LJ46_PYROM         | VHS, FYVE, UIM, UIM |
| 159 | tr A0A2T6ZAZ1 A0A2T6ZAZ1_TUBBO | VHS, FYVE, UIM, UIM |
| 160 | tr A0A4U0WTC3 A0A4U0WTC3_9PEZI | VHS, FYVE, UIM, UIM |
| 161 | tr A0A4S8LNE8 A0A4S8LNE8_DENBC | RhoGEF, FYVE        |
| 162 | tr A0A4V1IUA8 A0A4V1IUA8_9FUNG | VHS, FYVE           |
| 163 | tr L0P8I6 L0P8I6_PNEJ8         | FYVE                |
| 164 | tr R7Z380 R7Z380_CONA1         | VHS, FYVE, UIM, UIM |
| 165 | tr E4ZXS6 E4ZXS6_LEPMJ         | VHS, FYVE, UIM, UIM |
| 166 | tr A0A168Q840 A0A168Q840_MUCCL | VHS, FYVE, UIM, UIM |
| 167 | tr A0A0C2S3H8 A0A0C2S3H8_AMAMU | RhoGEF, FYVE        |
| 168 | tr A0A0C9N4H5 A0A0C9N4H5_9FUNG | VHS, FYVE, UIM, UIM |
| 169 | tr R4XHH8 R4XHH8_TAPDE         | VHS, FYVE, UIM, UIM |
| 170 | tr A0A0B7NCZ8 A0A0B7NCZ8_9FUNG | FYVE                |
| 171 | tr A0A163F5K2 A0A163F5K2_DIDRA | VHS, FYVE, UIM, UIM |

|     |                                |                     |
|-----|--------------------------------|---------------------|
| 172 | tr A0A6A6YA67 A0A6A6YA67_9PEZI | VHS, FYVE, UIM, UIM |
| 173 | tr A0A5C3KRI4 A0A5C3KRI4_9AGAR | RhoGEF, FYVE        |
| 174 | tr A0A0C2YUU7 A0A0C2YUU7_HEBCY | RhoGEF, FYVE        |
| 175 | tr G4T9B0 G4T9B0_SERID         | RhoGEF, FYVE        |
| 176 | tr A0A367JD28 A0A367JD28_RHIAZ | VHS, FYVE, UIM, UIM |
| 177 | tr A0A367JX58 A0A367JX58_RHIAZ | VHS, FYVE, UIM, UIM |
| 178 | tr A0A0M8MVG5 A0A0M8MVG5_9BASI | FYVE, zf-RING 2     |
| 179 | tr S2JXE4 S2JXE4_MUCC1         | VHS, FYVE, UIM, UIM |
| 180 | tr A0A286USL7 A0A286USL7_9AGAM | RhoGEF, FYVE        |
| 181 | tr A0A067NSG1 A0A067NSG1_PLEOS | RhoGEF, FYVE        |
| 182 | tr A0A316ZLR8 A0A316ZLR8_9BASI | RhoGEF, FYVE        |
| 183 | tr A0A4T0G0A2 A0A4T0G0A2_9BASI | RhoGEF, FYVE        |
| 184 | tr A0A075ARC6 A0A075ARC6_ROZAC | FYVE                |
| 185 | tr A0A4V1IZA8 A0A4V1IZA8_ROZAC | FYVE                |
| 186 | tr A0A3M7M1P8 A0A3M7M1P8_9PLEO | VHS, FYVE, UIM, UIM |
| 187 | tr D5GD30 D5GD30_TUBMM         | VHS, FYVE, UIM, UIM |
| 188 | tr A0A1X7RQY2 A0A1X7RQY2_ZYMTR | VHS, FYVE, UIM, UIM |

|     |                                |                     |
|-----|--------------------------------|---------------------|
| 189 | tr A0A1Y6LJF9 A0A1Y6LJF9_ZYMTR | VHS, FYVE, UIM, UIM |
| 190 | tr A0A2H1GBB8 A0A2H1GBB8_ZYMTR | VHS, FYVE, UIM, UIM |
| 191 | tr F9X9I8 F9X9I8_ZYMTI         | VHS, FYVE, UIM, UIM |
| 192 | tr A0A6A6A070 A0A6A6A070_9PLEO | VHS, FYVE, UIM, UIM |
| 193 | tr B0DJQ4 B0DJQ4_LACBS         | RhoGEF, FYVE        |
| 194 | tr A0A369JTG7 A0A369JTG7_HYPMA | RhoGEF, FYVE        |
| 195 | tr I4YHW0 I4YHW0_WALMC         | RhoGEF, FYVE        |
| 196 | tr A0A507CTR3 A0A507CTR3_9FUNG | VHS, FYVE, UIM, UIM |
| 197 | tr F4RZR0 F4RZR0_MELLP         | RhoGEF, FYVE        |
| 198 | tr A0A4T0WVM5 A0A4T0WVM5_9ASCO | VHS, FYVE, UIM, UIM |
| 199 | tr A0A150VI72 A0A150VI72_9PEZI | VHS, FYVE, UIM, UIM |
| 200 | tr A0A3M6ZNS9 A0A3M6ZNS9_HORWE | VHS, FYVE, UIM, UIM |
| 201 | tr A0A1Y1XRY0 A0A1Y1XRY0_9FUNG | PH, FYVE            |
| 202 | tr A0A074WRI8 A0A074WRI8_9PEZI | VHS, FYVE, UIM, UIM |
| 203 | tr A0A6A7BU37 A0A6A7BU37_9PEZI | VHS, FYVE           |
| 204 | tr C K1WTE0_TRIAC              | VHS, FYVE           |
| 205 | tr J6EPC0 J6EPC0_TRIAS         | VHS, FYVE, UIM, UIM |

|     |                                |                     |
|-----|--------------------------------|---------------------|
| 206 | tr A0A3N4JEN9 A0A3N4JEN9_9PEZI | VHS, FYVE, UIM, UIM |
| 207 | tr N1QCW3 N1QCW3_PSEFD         | VHS, FYVE, UIM, UIM |
| 208 | tr M2STQ7 M2STQ7_COCH5         | VHS, FYVE, UIM, UIM |
| 209 | tr N4X1G1 N4X1G1_COCH4         | VHS, FYVE, UIM, UIM |
| 210 | tr A0A6A5SBR1 A0A6A5SBR1_9PLEO | VHS, FYVE, UIM, UIM |
| 211 | tr A0A1Y2LUT7 A0A1Y2LUT7_EPING | VHS, FYVE           |
| 212 | tr E2LZL4 E2LZL4_MONPE         | FYVE                |
| 213 | tr A0A067S9R7 A0A067S9R7_GALM3 | RhoGEF, FYVE        |
| 214 | tr L0PFS6 L0PFS6_PNEJ8         | FYVE                |
| 215 | tr F4NZK1 F4NZK1_BATDJ         | VHS, FYVE, UIM, UIM |
| 216 | tr A0A3M7BVL5 A0A3M7BVL5_HORWE | VHS, FYVE, UIM, UIM |
| 217 | tr A0A5J5F2H1 A0A5J5F2H1_9PEZI | VHS, FYVE, UIM, UIM |
| 218 | tr A0A3M7GF14 A0A3M7GF14_HORWE | VHS, FYVE, UIM, UIM |
| 219 | tr A0A3M7EI93 A0A3M7EI93_HORWE | VHS, FYVE, UIM, UIM |
| 220 | tr A0A3M7A400 A0A3M7A400_HORWE | VHS, FYVE, UIM, UIM |
| 221 | tr A0A162Y6D2 A0A162Y6D2_MUCCL | FYVE                |
| 222 | tr A0A4U0TZE6 A0A4U0TZE6_9PEZI | VHS, FYVE, UIM, UIM |

|     |                                |                     |
|-----|--------------------------------|---------------------|
| 223 | tr A0A3M7DFE3 A0A3M7DFE3_HORWE | VHS, FYVE, UIM, UIM |
| 224 | tr A0A3M7C5L4 A0A3M7C5L4_HORWE | VHS, FYVE, UIM, UIM |
| 225 | tr A0A1Z5SW51 A0A1Z5SW51_HORWE | VHS, FYVE, UIM, UIM |
| 226 | tr A0A3M7IAA8 A0A3M7IAA8_HORWE | VHS, FYVE, UIM, UIM |
| 227 | tr A0A1Y1ZMB2 A0A1Y1ZMB2_9PLEO | VHS, FYVE, UIM, UIM |
| 228 | tr A0A3M7EIE8 A0A3M7EIE8_HORWE | VHS, FYVE, UIM, UIM |
| 229 | tr A0A3M7FRT0 A0A3M7FRT0_HORWE | VHS, FYVE, UIM, UIM |
| 230 | tr A0A3M6WMK4 A0A3M6WMK4_HORWE | VHS, FYVE, UIM, UIM |
| 231 | tr A0A0W4ZU85 A0A0W4ZU85_PNEJ7 | FYVE                |
| 232 | tr A0A409Y3I3 A0A409Y3I3_9AGAR | RhoGEF, FYVE        |
| 233 | tr A0A1X0QT00 A0A1X0QT00_RHIZD | VHS, FYVE, UIM, UIM |
| 234 | tr A0A2G4SSF8 A0A2G4SSF8_RHIZD | VHS, FYVE, UIM, UIM |
| 235 | tr A0A4V4JT84 A0A4V4JT84_AURPU | VHS, FYVE, UIM, UIM |
| 236 | tr A0A4S9NID1 A0A4S9NID1_AURPU | VHS, FYVE, UIM, UIM |
| 237 | tr A0A4V4JPE1 A0A4V4JPE1_AURPU | VHS, FYVE, UIM, UIM |
| 238 | tr A0A4S8U3P8 A0A4S8U3P8_AURPU | VHS, FYVE, UIM, UIM |
| 239 | tr A0A4T0CLC8 A0A4T0CLC8_AURPU | VHS, FYVE, UIM, UIM |

|     |                                |                     |
|-----|--------------------------------|---------------------|
| 240 | tr A0A4S8XK24 A0A4S8XK24_AURPU | VHS, FYVE, UIM, UIM |
| 241 | tr A0A4S9PXJ6 A0A4S9PXJ6_AURPU | VHS, FYVE, UIM, UIM |
| 242 | tr A0A4S9S1G3 A0A4S9S1G3_AURPU | VHS, FYVE, UIM, UIM |
| 243 | tr A0A4S9X121 A0A4S9X121_AURPU | VHS, FYVE, UIM, UIM |
| 244 | tr A0A4S9MIC5 A0A4S9MIC5_AURPU | VHS, FYVE, UIM, UIM |
| 245 | tr A0A4T0AAT4 A0A4T0AAT4_AURPU | VHS, FYVE, UIM, UIM |
| 246 | tr A0A4V4LMX5 A0A4V4LMX5_AURPU | VHS, FYVE, UIM, UIM |
| 247 | tr A0A4S9MD28 A0A4S9MD28_AURPU | VHS, FYVE, UIM, UIM |
| 248 | tr A0A4S9SZX6 A0A4S9SZX6_AURPU | VHS, UIM, UIM       |
| 249 | tr A0A4S8TGC0 A0A4S8TGC0_AURPU | VHS, FYVE, UIM, UIM |
| 250 | tr A0A4S9BBL0 A0A4S9BBL0_AURPU | VHS, FYVE, UIM, UIM |

### **Nonhuman mammals**

| <i>No</i> | <i>Accession No</i>            | <i>Modules</i> |
|-----------|--------------------------------|----------------|
| 1         | sp Q9H8W4 PKHF2_HUMAN          | PH, FYVE       |
| 2         | tr G3RXJ3 G3RXJ3_GORGO         | PH, FYVE       |
| 3         | tr A0A2R8ZRE3 A0A2R8ZRE3_PANPA | PH, FYVE       |
| 4         | tr A0A6D2WS13 A0A6D2WS13_PANTR | PH, FYVE       |
| 5         | tr H2QWG2 H2QWG2_PANTR         | PH, FYVE       |
| 6         | tr A0A2K6B0W2 A0A2K6B0W2_MACNE | PH, FYVE       |
| 7         | tr A0A2K6JSQ3 A0A2K6JSQ3_RHIBE | PH, FYVE       |
| 8         | tr A0A2K5UMP8 A0A2K5UMP8_MACFA | PH, FYVE       |
| 9         | tr G7PC92 G7PC92_MACFA         | PH, FYVE       |
| 10        | tr A0A2I3GPW4 A0A2I3GPW4_NOMLE | PH, FYVE       |
| 11        | tr A0A2K5XAN3 A0A2K5XAN3_MANLE | PH, FYVE       |
| 12        | tr A0A2K5KIW2 A0A2K5KIW2_CERAT | PH, FYVE       |
| 13        | tr A0A2J8UGL7 A0A2J8UGL7_PONAB | PH, FYVE       |
| 14        | tr G7MZT0 G7MZT0_MACMU         | PH, FYVE       |
| 15        | tr A0A2K5PKC3 A0A2K5PKC3_CEBIM | PH, FYVE       |

|    |                                |          |
|----|--------------------------------|----------|
| 16 | tr A0A2K6NLA2 A0A2K6NLA2_RHIRO | PH, FYVE |
| 17 | tr F7ASZ1 F7ASZ1_MACMU         | PH, FYVE |
| 18 | tr A0A6J3FGX3 A0A6J3FGX3_SAPAP | PH, FYVE |
| 19 | tr A0A6D2X014 A0A6D2X014_PONAB | PH, FYVE |
| 20 | tr A0A6I9ICZ8 A0A6I9ICZ8_VICPA | PH, FYVE |
| 21 | tr S9WGC9 S9WGC9_CAMFR         | PH, FYVE |
| 22 | tr A0A5N4CHZ2 A0A5N4CHZ2_CAMDR | PH, FYVE |
| 23 | tr A0A2K5HBE8 A0A2K5HBE8_COLAP | PH, FYVE |
| 24 | tr A0A2K5C657 A0A2K5C657_AOTNA | PH, FYVE |
| 25 | tr A0A096MLM1 A0A096MLM1_PAPAN | PH, FYVE |
| 26 | tr F7FEC3 F7FEC3_CALJA         | PH, FYVE |
| 27 | tr A0A0D9SB87 A0A0D9SB87_CHLSB | PH, FYVE |
| 28 | tr A0A2K6S793 A0A2K6S793_SAIBB | PH, FYVE |
| 29 | tr A0A3Q7TWS2 A0A3Q7TWS2_VULVU | PH, FYVE |
| 30 | tr A0A1S3AB18 A0A1S3AB18_ERIEU | PH, FYVE |
| 31 | tr A0A5E4BFX5 A0A5E4BFX5_MARMO | PH, FYVE |
| 32 | tr I3MAC4 I3MAC4_ICTTR         | PH, FYVE |
| 33 | tr A0A1U7T0A4 A0A1U7T0A4_CARSF | PH, FYVE |
| 34 | tr A0A2K6ERG1 A0A2K6ERG1_PROCO | PH, FYVE |
| 35 | tr A0A6I9JB2 A0A6I9JB2_CHRAS   | PH, FYVE |
| 36 | tr A0A3Q7P8U5 A0A3Q7P8U5_CALUR | PH, FYVE |
| 37 | tr A0A3P4LK23 A0A3P4LK23_GULGU | PH, FYVE |
| 38 | tr M3Z4K3 M3Z4K3_MUSPF         | PH, FYVE |
| 39 | tr A0A485MJJ6 A0A485MJJ6_LYNPA | PH, FYVE |
| 40 | tr A0A667IBC1 A0A667IBC1_LYNCA | PH, FYVE |
| 41 | tr A0A4X1U327 A0A4X1U327_PIG   | PH, FYVE |
| 42 | tr U6CRZ6 U6CRZ6_NEOVI         | PH, FYVE |
| 43 | tr A0A2Y9EYL3 A0A2Y9EYL3_PHYMC | PH, FYVE |
| 44 | tr M3WVQ3 M3WVQ3_FELCA         | PH, FYVE |
| 45 | tr A0A7J8DUD9 A0A7J8DUD9_MOLMO | PH, FYVE |
| 46 | tr A0A6P6HRR1 A0A6P6HRR1_PUMCO | PH, FYVE |
| 47 | tr A0A287ASA9 A0A287ASA9_PIG   | PH, FYVE |
| 48 | tr A0A6J1ZRF1 A0A6J1ZRF1_ACIBB | PH, FYVE |
| 49 | tr A0A6P4WYG5 A0A6P4WYG5_PANPR | PH, FYVE |
| 50 | tr A0A5N3XBU7 A0A5N3XBU7_MUNRE | PH, FYVE |
| 51 | tr A0A5N3WEU8 A0A5N3WEU8_MUNMU | PH, FYVE |
| 52 | tr L8ILX8 L8ILX8_9CETA         | PH, FYVE |
| 53 | tr A4IFN8 A4IFN8_BOVIN         | PH, FYVE |
| 54 | tr A0A4W2EB56 A0A4W2EB56_BOBOX | PH, FYVE |



|    |                                |          |
|----|--------------------------------|----------|
| 55 | tr A0A6P5CTL6 A0A6P5CTL6_BOSIN | PH, FYVE |
| 56 | tr A0A6J0WJ70 A0A6J0WJ70_ODOVR | PH, FYVE |
| 57 | tr A0A6P3GQJ4 A0A6P3GQJ4_BISBI | PH, FYVE |
| 58 | tr A0A2U3WPC7 A0A2U3WPC7_ODORO | PH, FYVE |
| 59 | tr A0A7J7VF05 A0A7J7VF05_RHIFE | PH, FYVE |
| 60 | tr L5KAU6 L5KAU6_PTEAL         | PH, FYVE |
| 61 | tr A0A6P3QVM8 A0A6P3QVM8_PTEVA | PH, FYVE |
| 62 | tr A0A2Y9PAZ8 A0A2Y9PAZ8_DELLE | PH, FYVE |
| 63 | tr G1PK15 G1PK15_MYOLU         | PH, FYVE |
| 64 | tr A0A7J7TK50 A0A7J7TK50_MYOMY | PH, FYVE |
| 65 | tr A0A2Y9GX76 A0A2Y9GX76_NEOSC | PH, FYVE |
| 66 | tr L5MHS6 L5MHS6_MYODS         | PH, FYVE |
| 67 | tr A0A2U3XES2 A0A2U3XES2_LEPWE | PH, FYVE |
| 68 | tr A0A7J7VN67 A0A7J7VN67_PIPKU | PH, FYVE |
| 69 | tr A0A452QFV9 A0A452QFV9_URSAM | PH, FYVE |
| 70 | tr A0A6G1APQ5 A0A6G1APQ5_CROCR | PH, FYVE |
| 71 | tr A0A340WWB4 A0A340WWB4_LIPVE | PH, FYVE |
| 72 | tr A0A3Q7WAC4 A0A3Q7WAC4_URSAR | PH, FYVE |
| 73 | tr A0A250XXA1 A0A250XXA1_CASCN | PH, FYVE |
| 74 | tr G9KH59 G9KH59_MUSPF         | PH, FYVE |
| 75 | tr A0A1U7QHL5 A0A1U7QHL5_MESAU | PH, FYVE |
| 76 | tr A0A452CBQ1 A0A452CBQ1_BALAS | PH, FYVE |
| 77 | tr A0A2Y9QET1 A0A2Y9QET1_TRIMA | PH, FYVE |
| 78 | tr A0A6P5PKF8 A0A6P5PKF8_MUSCR | PH, FYVE |
| 79 | tr A0A341CEL5 A0A341CEL5_NEOAA | PH, FYVE |
| 80 | tr A0A484GRA3 A0A484GRA3_SOUCH | PH, FYVE |
| 81 | tr A0A7J8C3Q9 A0A7J8C3Q9_ROUAE | PH, FYVE |
| 82 | tr A0A384BXS8 A0A384BXS8_URSMA | PH, FYVE |
| 83 | tr A0A2U4AI60 A0A2U4AI60_TURTR | PH, FYVE |
| 84 | tr A0A2Y9J9Y4 A0A2Y9J9Y4_ENHLU | PH, FYVE |
| 85 | tr L8YGB7 L8YGB7_TUPCH         | PH, FYVE |
| 86 | tr G3UCQ4 G3UCQ4_LOXAF         | PH, FYVE |
| 87 | tr D2HVB5 D2HVB5_AILME         | PH, FYVE |
| 88 | tr A0A6I9L8U8 A0A6I9L8U8_PERMB | PH, FYVE |
| 89 | tr A0A1S3EVN9 A0A1S3EVN9_DIPOR | PH, FYVE |
| 90 | tr A0A2K5C233 A0A2K5C233_AOTNA | PH, FYVE |
| 91 | tr H0Y0B3 H0Y0B3_OTOGA         | PH, FYVE |
| 92 | tr A0A6J2NCI4 A0A6J2NCI4_9CHIR | PH, FYVE |
| 93 | sp Q91WB4 PKHF2_MOUSE          | PH, FYVE |

|     |                                |                   |
|-----|--------------------------------|-------------------|
| 94  | tr A0A7J7EHJ9 A0A7J7EHJ9_DICBM | PH, FYVE          |
| 95  | tr K9IHW6 K9IHW6_DESRO         | PH, FYVE          |
| 96  | tr A0A452DYL3 A0A452DYL3_CAPHI | PH, FYVE          |
| 97  | tr A0A3Q2HWW6 A0A3Q2HWW6_HORSE | PH, FYVE          |
| 98  | tr W5PZ70 W5PZ70_SHEEP         | PH, FYVE          |
| 99  | tr A0A6P7ECY0 A0A6P7ECY0_SHEEP | PH, FYVE          |
| 100 | tr B1WBV4 B1WBV4_RAT           | PH, FYVE          |
| 101 | tr A0A6J2F8G3 A0A6J2F8G3_ZALCA | PH, FYVE          |
| 102 | tr A0A7N4NQ24 A0A7N4NQ24_SARHA | PH, FYVE          |
| 103 | tr A0A6P5IQU3 A0A6P5IQU3_PHACI | PH, FYVE          |
| 104 | tr A0A286XYJ1 A0A286XYJ1_CAVPO | PH, FYVE          |
| 105 | tr A0A5E4BEY9 A0A5E4BEY9_MARMO | PH, FYVE          |
| 106 | tr A0A091DW22 A0A091DW22_FUKDA | PH, FYVE          |
| 107 | tr A0A0P6K1S8 A0A0P6K1S8_HETGA | PH, FYVE          |
| 108 | tr F7A285 F7A285_ORNAN         | PH, FYVE          |
| 109 | tr F6Q9Z2 F6Q9Z2_MONDO         | SQS_PSY, PH, FYVE |
| 110 | tr A0A6P3FWN8 A0A6P3FWN8_OCTDE | PH, FYVE          |
| 111 | tr A0A6A1QJM0 A0A6A1QJM0_BALPH | PH, FYVE          |
| 112 | tr A0A673V5I4 A0A673V5I4_SURSU | PH, FYVE          |
| 113 | tr A0A6J0YZI7 A0A6J0YZI7_ODOVR | PH, FYVE          |
| 114 | tr F7F262 F7F262_MONDO         | PH, FYVE          |
| 115 | tr A0A5F8H7A3 A0A5F8H7A3_MONDO | PH, FYVE          |
| 116 | tr A0A5F8GYD7 A0A5F8GYD7_MONDO | PH, FYVE          |
| 117 | tr A8Y5N8 A8Y5N8_MOUSE         | PH, FYVE          |
| 118 | tr A0A5N3XKB2 A0A5N3XKB2_MUNRE | PH, FYVE          |
| 119 | tr A0A1A6FXD9 A0A1A6FXD9_NEOLE | PH, FYVE          |
| 120 | tr A0A6B0RRU8 A0A6B0RRU8_9CETA | PH, FYVE          |
| 121 | tr A0A5N3UY12 A0A5N3UY12_MUNMU | PH, FYVE          |
| 122 | tr A0A0D9SB08 A0A0D9SB08_CHLSB | PH, FYVE          |
| 123 | tr A0A2J8KSM2 A0A2J8KSM2_PANTR | PH, FYVE          |
| 124 | sp Q96S99 PKHF1_HUMAN          | PH, FYVE          |
| 125 | tr A0A2K5JGW8 A0A2K5JGW8_COLAP | PH, FYVE          |
| 126 | tr A0A2K6CYZ9 A0A2K6CYZ9_MACNE | PH, FYVE          |
| 127 | tr A0A2K6JWD4 A0A2K6JWD4_RHIBE | PH, FYVE          |
| 128 | tr A0A2K5UDM0 A0A2K5UDM0_MACFA | PH, FYVE          |
| 129 | tr G3QH50 G3QH50_GORGO         | PH, FYVE          |
| 130 | tr A0A2I3G625 A0A2I3G625_NOMLE | PH, FYVE          |
| 131 | tr A0A2K5XLS1 A0A2K5XLS1_MANLE | PH, FYVE          |
| 132 | tr A0A0A0MVG7 A0A0A0MVG7_PAPAN | PH, FYVE          |

|     |                                |          |
|-----|--------------------------------|----------|
| 133 | tr A0A2K5KX81 A0A2K5KX81_CERAT | PH, FYVE |
| 134 | tr G7NLE7 G7NLE7_MACMU         | PH, FYVE |
| 135 | tr A0A2K6NPM4 A0A2K6NPM4_RHIRO | PH, FYVE |
| 136 | tr F6WEV7 F6WEV7_MACMU         | PH, FYVE |
| 137 | tr H2QFY5 H2QFY5_PANTR         | PH, FYVE |
| 138 | tr A0A2J8SAC5 A0A2J8SAC5_PONAB | PH, FYVE |
| 139 | tr A0A6D2Y8X4 A0A6D2Y8X4_PONAB | PH, FYVE |
| 140 | tr G7PX49 G7PX49_MACFA         | PH, FYVE |
| 141 | tr A0A2R9AA53 A0A2R9AA53_PANPA | PH, FYVE |
| 142 | tr B4DWN9 B4DWN9_HUMAN         | PH, FYVE |
| 143 | tr L8IB21 L8IB21_9CETA         | PH, FYVE |
| 144 | tr A2VE19 A2VE19_BOVIN         | PH, FYVE |
| 145 | tr A0A4W2H1W7 A0A4W2H1W7_BOBOX | PH, FYVE |
| 146 | tr A0A6P5DDG5 A0A6P5DDG5_BOSIN | PH, FYVE |
| 147 | tr A0A091D210 A0A091D210_FUKDA | PH, FYVE |
| 148 | tr A0A6B0R7Q5 A0A6B0R7Q5_9CETA | PH, FYVE |
| 149 | tr A0A2K5PK00 A0A2K5PK00_CEBIM | PH, FYVE |
| 150 | tr A0A1U7R682 A0A1U7R682_MESAU | PH, FYVE |
| 151 | tr A0A2K6SFK7 A0A2K6SFK7_SAIBB | PH, FYVE |
| 152 | tr A0A2K5E2Y5 A0A2K5E2Y5_AOTNA | PH, FYVE |
| 153 | tr U3D2H9 U3D2H9_CALJA         | PH, FYVE |
| 154 | tr A0A6J3FHK1 A0A6J3FHK1_SAPAP | PH, FYVE |
| 155 | tr H0XH62 H0XH62_OTOGA         | PH, FYVE |
| 156 | tr A0A6J1Y5U6 A0A6J1Y5U6_ACIBB | PH, FYVE |
| 157 | tr A0A7N4PT60 A0A7N4PT60_SARHA | PH, FYVE |
| 158 | tr A0A6P3YLF4 A0A6P3YLF4_SHEEP | PH, FYVE |
| 159 | tr G5BL44 G5BL44_HETGA         | PH, FYVE |
| 160 | tr A0A5K1U7A2 A0A5K1U7A2_CALJA | PH, FYVE |
| 161 | tr A0A7J8CA60 A0A7J8CA60_MOLMO | PH, FYVE |
| 162 | sp Q68FU1 PKHF1_RAT            | PH, FYVE |
| 163 | tr A0A5J5MWL9 A0A5J5MWL9_MUNRE | PH, FYVE |
| 164 | tr A0A5N3VFQ3 A0A5N3VFQ3_MUNMU | PH, FYVE |
| 165 | tr A0A452DRQ5 A0A452DRQ5_CAPHI | PH, FYVE |
| 166 | tr A0A6J0XTU7 A0A6J0XTU7_ODOVR | PH, FYVE |
| 167 | tr A0A1S3AR32 A0A1S3AR32_ERIEU | PH, FYVE |
| 168 | tr A0A7N4NQK3 A0A7N4NQK3_SARHA | PH, FYVE |
| 169 | tr A0A6P5K5Z3 A0A6P5K5Z3_PHACI | PH, FYVE |
| 170 | tr A0A286XEI1 A0A286XEI1_CAVPO | PH, FYVE |
| 171 | tr A0A6P5K5R9 A0A6P5K5R9_PHACI | PH, FYVE |

|     |                                |          |
|-----|--------------------------------|----------|
| 172 | tr A0A6J0XTS7 A0A6J0XTS7_ODOVR | PH, FYVE |
| 173 | tr A0A485NDJ2 A0A485NDJ2_LYNPA | PH, FYVE |
| 174 | tr A0A667J1S0 A0A667J1S0_LYNCA | PH, FYVE |
| 175 | tr A0A4X2L5D8 A0A4X2L5D8_VOMUR | PH, FYVE |
| 176 | tr A0A6P5K760 A0A6P5K760_PHACI | PH, FYVE |
| 177 | tr M3WT21 M3WT21_FELCA         | PH, FYVE |
| 178 | tr A0A6P6H4E9 A0A6P6H4E9_PUMCO | PH, FYVE |
| 179 | tr A0A6P4TXR5 A0A6P4TXR5_PANPR | PH, FYVE |
| 180 | tr A0A2U3X5H7 A0A2U3X5H7_ODORO | PH, FYVE |
| 181 | tr A0A6G1B9W0 A0A6G1B9W0_CROCR | PH, FYVE |
| 182 | tr A0A6J0E1B0 A0A6J0E1B0_PERMB | PH, FYVE |
| 183 | tr F7EVS4 F7EVS4_MONDO         | PH, FYVE |
| 184 | tr A0A6J0DUG8 A0A6J0DUG8_PERMB | PH, FYVE |
| 185 | tr A0A2Y9HYM5 A0A2Y9HYM5_NEOSC | PH, FYVE |
| 186 | tr A0A2U3Y6L0 A0A2U3Y6L0_LEPWE | PH, FYVE |
| 187 | tr A0A5E4BQ75 A0A5E4BQ75_MARMO | PH, FYVE |
| 188 | tr I3N3T1 I3N3T1_ICTTR         | PH, FYVE |
| 189 | tr F7AL15 F7AL15_ORNAN         | PH, FYVE |
| 190 | tr A0A6J0E1A5 A0A6J0E1A5_PERMB | PH, FYVE |
| 191 | tr A0A3Q7MSJ7 A0A3Q7MSJ7_CALUR | PH, FYVE |
| 192 | tr A0A6J2F2G5 A0A6J2F2G5_ZALCA | PH, FYVE |
| 193 | tr A0A6P6EYH5 A0A6P6EYH5_OCTDE | PH, FYVE |
| 194 | sp Q3TB82 PKHF1_MOUSE          | PH, FYVE |
| 195 | tr A0A061HTX9 A0A061HTX9_CRIGR | PH, FYVE |
| 196 | tr A0A671FB93 A0A671FB93_RHIFE | PH, FYVE |
| 197 | tr A0A341AK17 A0A341AK17_NEOAA | PH, FYVE |
| 198 | tr A0A340YG10 A0A340YG10_LIPVE | PH, FYVE |
| 199 | tr A0A5N4DR82 A0A5N4DR82_CAMDR | PH, FYVE |
| 200 | tr A0A4U1EUS3 A0A4U1EUS3_MONMO | PH, FYVE |
| 201 | tr A0A2Y9P694 A0A2Y9P694_DELLE | PH, FYVE |
| 202 | tr A0A2U3V2U0 A0A2U3V2U0_TURTR | PH, FYVE |
| 203 | tr A0A3Q7TL14 A0A3Q7TL14_VULVU | PH, FYVE |
| 204 | tr G1ML40 G1ML40_AILME         | PH, FYVE |
| 205 | tr A0A6P7R571 A0A6P7R571_MUSCR | PH, FYVE |
| 206 | tr A0A3P4S7D1 A0A3P4S7D1_GULGU | PH, FYVE |
| 207 | tr A0A6P3V9N9 A0A6P3V9N9_OCTDE | PH, FYVE |
| 208 | tr M3Z5G8 M3Z5G8_MUSPF         | PH, FYVE |
| 209 | tr D2H395 D2H395_AILME         | PH, FYVE |
| 210 | tr A0A383YQU7 A0A383YQU7_BALAS | PH, FYVE |

|     |                                |                      |
|-----|--------------------------------|----------------------|
| 211 | tr A0A2Y9F4I2 A0A2Y9F4I2_PHYMC | PH, FYVE             |
| 212 | tr A0A2Y9LBN9 A0A2Y9LBN9_ENHLU | PH, FYVE             |
| 213 | tr A0A3Q7UUY9 A0A3Q7UUY9_URSAR | PH, FYVE             |
| 214 | tr A0A2F0BD53 A0A2F0BD53_ESCRO | PH, FYVE             |
| 215 | tr G3UCB5 G3UCB5_LOXAF         | PH, FYVE             |
| 216 | tr A0A2Y9QH78 A0A2Y9QH78_TRIMA | PH, FYVE             |
| 217 | tr A0A250YE73 A0A250YE73_CASCN | PH, FYVE             |
| 218 | tr A0A6I9K0J7 A0A6I9K0J7_CHRAS | PH, FYVE             |
| 219 | tr A0A452QT72 A0A452QT72_URSAM | PH, FYVE             |
| 220 | tr A0A4X1TW95 A0A4X1TW95_PIG   | PH, FYVE             |
| 221 | tr F1RNZ0 F1RNZ0_PIG           | PH, FYVE             |
| 222 | tr A0A484GVY7 A0A484GVY7_SOUCH | PH, FYVE             |
| 223 | tr A0A7J8CKE8 A0A7J8CKE8_ROUAE | PH, FYVE             |
| 224 | tr A0A5G2RAS5 A0A5G2RAS5_PIG   | PH, FYVE             |
| 225 | tr A0A1A6G1C6 A0A1A6G1C6_NEOLE | PH, FYVE             |
| 226 | tr A0A6J2L2L8 A0A6J2L2L8_9CHIR | PH, FYVE             |
| 227 | tr A0A3Q2LSN2 A0A3Q2LSN2_HORSE | PH, FYVE             |
| 228 | tr E2R1B7 E2R1B7_CANLF         | PH, FYVE             |
| 229 | tr K9IX34 K9IX34_DESRO         | PH, FYVE             |
| 230 | tr A0A7J7SDK0 A0A7J7SDK0_MYOMY | PH, FYVE             |
| 231 | tr A0A6P3IET2 A0A6P3IET2_BISBI | PH, FYVE             |
| 232 | tr G3HI22 G3HI22_CRIGR         | FYVE                 |
| 233 | tr G5C4B3 G5C4B3_HETGA         | FYVE                 |
| 234 | tr W5P1M9 W5P1M9_SHEEP         | PH                   |
| 235 | tr S9WTG5 S9WTG5_CAMFR         | PH, FYVE             |
| 236 | tr A0A6J0AU76 A0A6J0AU76_VICPA | PH                   |
| 237 | tr L5KVX2 L5KVX2_PTEAL         | PH                   |
| 238 | tr A0A2J8KSN2 A0A2J8KSN2_PANTR | PH                   |
| 239 | tr A0A2J8SAE9 A0A2J8SAE9_PONAB | PH                   |
| 240 | tr K7ELB8 K7ELB8_HUMAN         | PH                   |
| 241 | tr L8Y3Z0 L8Y3Z0_TUPCH         | PH, FYVE             |
| 242 | tr A0A2J8KSM7 A0A2J8KSM7_PANTR | NO                   |
| 243 | tr A0A2J8SAE1 A0A2J8SAE1_PONAB | NO                   |
| 244 | tr K7EIX0 K7EIX0_HUMAN         | NO                   |
| 245 | tr A0A2J8KVM1 A0A2J8KVM1_PANTR | PH, FYVE             |
| 246 | tr A0A2J8XN15 A0A2J8XN15_PONAB | PH, FYVE             |
| 247 | tr F8VQX5 F8VQX5_HUMAN         | PH, FYVE             |
| 248 | tr A0A4X2MDN9 A0A4X2MDN9_VOMUR | RhoGEF, PH, FYVE, PH |
| 249 | tr A0A4X2M634 A0A4X2M634_VOMUR | RhoGEF, PH, FYVE, PH |

|     |                        |                      |
|-----|------------------------|----------------------|
| 250 | tr F6W6U6 F6W6U6_MONDO | RhoGEF, PH, FYVE, PH |
|-----|------------------------|----------------------|

### **Humans**

| <i>No</i> | <i>Accession No</i>            | <i>Modules</i>         |
|-----------|--------------------------------|------------------------|
| 1         | sp Q9H8W4 PKHF2_HUMAN          | PH, FYVE               |
| 2         | sp Q96S99 PKHF1_HUMAN          | PH, FYVE               |
| 3         | tr B4DWN9 B4DWN9_HUMAN         | PH, FYVE               |
| 4         | tr K7ELB8 K7ELB8_HUMAN         | PH                     |
| 5         | tr K7EIX0 K7EIX0_HUMAN         | NO                     |
| 6         | tr F8VQX5 F8VQX5_HUMAN         | PH, FYVE               |
| 7         | tr A4FVC4 A4FVC4_HUMAN         | RhoGEF, PH, FYVE, PH   |
| 8         | sp Q6ZV73 FGD6_HUMAN           | R RhoGEF, PH, FYVE, PH |
| 9         | tr A0A2X0SFJ2 A0A2X0SFJ2_HUMAN | RhoGEF, PH, FYVE, PH   |
| 10        | tr Q49A55 Q49A55_HUMAN         | RhoGEF, PH, FYVE       |
| 11        | tr F8W1R0 F8W1R0_HUMAN         | RhoGEF, PH, FYVE, PH   |
| 12        | sp Q96M96 FGD4_HUMAN           | RhoGEF, PH, FYVE, PH   |
| 13        | tr A0A2X0U2J9 A0A2X0U2J9_HUMAN | RhoGEF, PH, FYVE, PH   |
| 14        | tr B7Z493 B7Z493_HUMAN         | RhoGEF, PH, FYVE, PH   |

|    |                                |                      |
|----|--------------------------------|----------------------|
| 15 | tr B7Z8F9 B7Z8F9_HUMAN         | RhoGEF, PH, FYVE, PH |
| 16 | tr E9PJX4 E9PJX4_HUMAN         | RhoGEF, PH, FYVE, PH |
| 17 | tr F8VWL3 F8VWL3_HUMAN         | RhoGEF, PH, FYVE, PH |
| 18 | sp Q7Z6J4 FGD2_HUMAN           | RhoGEF, PH, FYVE, PH |
| 19 | tr A8K304 A8K304_HUMAN         | RhoGEF, PH, FYVE, PH |
| 20 | tr A0A384NQ05 A0A384NQ05_HUMAN | RhoGEF, PH, FYVE, PH |
| 21 | tr A0A2X0SYZ7 A0A2X0SYZ7_HUMAN | RhoGEF, PH, FYVE, PH |
| 22 | sp P98174 FGD1_HUMAN           | RhoGEF, PH, FYVE, PH |
| 23 | tr A0A024R9Y5 A0A024R9Y5_HUMAN | RhoGEF, PH, FYVE, PH |
| 24 | tr A0A2X0SFE1 A0A2X0SFE1_HUMAN | RhoGEF, PH, FYVE, PH |
| 25 | tr G3V2D8 G3V2D8_HUMAN         | FYVE                 |
| 26 | tr A0A7I2YQV0 A0A7I2YQV0_HUMAN | FYVE                 |
| 27 | sp Q68DK2 ZFY26_HUMAN          | FYVE                 |
| 28 | tr A0A7I2YQU3 A0A7I2YQU3_HUMAN | FYVE                 |
| 29 | tr A0A7I2V403 A0A7I2V403_HUMAN | FYVE                 |
| 30 | tr B7ZM68 B7ZM68_HUMAN         | RhoGEF, PH, FYVE     |
| 31 | tr A3KMQ0 A3KMQ0_HUMAN         | RhoGEF, PH, FYVE, PH |
| 32 | sp Q6ZNL6 FGD5_HUMAN           | RhoGEF, PH, FYVE, PH |
| 33 | tr A0A2X0SFF2 A0A2X0SFF2_HUMAN | RhoGEF, PH, FYVE, PH |
| 34 | sp Q8WXA3 RUFY2_HUMAN          | RUN, FYVE            |

|    |                                |                                       |
|----|--------------------------------|---------------------------------------|
| 35 | tr H0YD93 H0YD93_HUMAN         | RUN, FYVE                             |
| 36 | tr B3KSL1 B3KSL1_HUMAN         | FYVE                                  |
| 37 | tr A8K7B1 A8K7B1_HUMAN         | RUN, FYVE                             |
| 38 | sp Q96T51 RUFY1_HUMAN          | RUN, FYVE                             |
| 39 | tr Q59GI4 Q59GI4_HUMAN         | FYVE, DUF3480                         |
| 40 | sp O95405 ZFYV9_HUMAN          | FYVE, DUF3480                         |
| 41 | sp Q7Z3T8 ZFY16_HUMAN          | FYVE, DUF3480                         |
| 42 | tr A0A024RAL3 A0A024RAL3_HUMAN | FYVE, DUF3480                         |
| 43 | tr B4DVN4 B4DVN4_HUMAN         | FYVE, PH                              |
| 44 | sp Q15075 EEA1_HUMAN           | FYVE                                  |
| 45 | tr Q49AA1 Q49AA1_HUMAN         | FYVE                                  |
| 46 | tr F8VY01 F8VY01_HUMAN         | RhoGEF, FYVE                          |
| 47 | sp Q9HCC9 LST2_HUMAN           | FYVE                                  |
| 48 | sp Q9Y4F1 FARP1_HUMAN          | FERM_M, FERM_C, FA,<br>RhoGEF, PH, PH |
| 49 | tr A0A2X0TVY0 A0A2X0TVY0_HUMAN | FERM_M, FERM_C, FA,<br>RhoGEF, PH, PH |
| 50 | tr B4DS99 B4DS99_HUMAN         | RhoGEF, PH                            |
| 51 | tr G5E953 G5E953_HUMAN         | Myotub-related, FYVE                  |



|    |                                |                        |
|----|--------------------------------|------------------------|
| 52 | sp Q13615 MTMR3_HUMAN          | Myotub-related, FYVE   |
| 53 | tr A8K0L6 A8K0L6_HUMAN         | Myotub-related, FYVE   |
| 54 | tr A7E2W2 A7E2W2_HUMAN         | Myotub-related, FYVE   |
| 55 | sp Q5JSP0 FGD3_HUMAN           | RhoGEF, PH, FYVE       |
| 56 | tr A0A024R252 A0A024R252_HUMAN | RhoGEF, PH, FYVE       |
| 57 | tr A0A2X0U4Q9 A0A2X0U4Q9_HUMAN | RhoGEF, PH, FYVE       |
| 58 | tr Q9H8N9 Q9H8N9_HUMAN         | WD40                   |
| 59 | sp Q8IWB7 WDFY1_HUMAN          | WD40                   |
| 60 | tr A0A024R488 A0A024R488_HUMAN | WD40                   |
| 61 | tr A0A7I2YQD1 A0A7I2YQD1_HUMAN | VHS, FYVE, Hrs_helical |
| 62 | tr I3L1P5 I3L1P5_HUMAN         | VHS, FYVE, Hrs_helical |
| 63 | tr B4E1E2 B4E1E2_HUMAN         | VHS, FYVE, Hrs_helical |
| 64 | tr A0A7I2V3Z1 A0A7I2V3Z1_HUMAN | VHS, FYVE, Hrs_helical |
| 65 | tr Q9NXY1 Q9NXY1_HUMAN         | RhoGEF, PH, FYVE       |
| 66 | tr A0A0S2Z4Q4 A0A0S2Z4Q4_HUMAN | VHS, FYVE              |
| 67 | tr A0A7I2V6E0 A0A7I2V6E0_HUMAN | VHS, FYVE, Hrs_helical |
| 68 | tr A8K9G1 A8K9G1_HUMAN         | RhoGEF, PH, FYVE       |

|    |                                |                                       |
|----|--------------------------------|---------------------------------------|
| 69 | tr A0A7I2V2K2 A0A7I2V2K2_HUMAN | VHS, FYVE, Hrs_helical                |
| 70 | tr A0A7I2V5A2 A0A7I2V5A2_HUMAN | VHS, FYVE, Hrs_helical                |
| 71 | tr A0A7I2V3I8 A0A7I2V3I8_HUMAN | VHS, FYVE, Hrs_helical                |
| 72 | tr A0A7I2V3F9 A0A7I2V3F9_HUMAN | VHS, FYVE, Hrs_helical                |
| 73 | tr A0A7I2V2D8 A0A7I2V2D8_HUMAN | VHS, FYVE, Hrs_helical                |
| 74 | tr A0A7I2V2W5 A0A7I2V2W5_HUMAN | VHS, FYVE, Hrs_helical                |
| 75 | tr A0A7I2V2R9 A0A7I2V2R9_HUMAN | VHS, FYVE, Hrs_helical                |
| 76 | sp O14964 HGS_HUMAN            | VHS, FYVE, Hrs_helical                |
| 77 | tr A0A7I2V3J3 A0A7I2V3J3_HUMAN | VHS, FYVE, Hrs_helical                |
| 78 | tr A0A0S2Z4R4 A0A0S2Z4R4_HUMAN | VHS, FYVE, Hrs_helical                |
| 79 | tr A0A7I2V637 A0A7I2V637_HUMAN | VHS, VHS, FYVE,<br>Hrs_helical        |
| 80 | tr A0A7I2V5A3 A0A7I2V5A3_HUMAN | VHS, FYVE, Hrs_helical                |
| 81 | tr B4DFP5 B4DFP5_HUMAN         | VHS, FYVE                             |
| 82 | sp O94887 FARP2_HUMAN          | FERM_M, FERM_C, FA,<br>RhoGEF, PH, PH |
| 83 | tr A0A2X0SSL3 A0A2X0SSL3_HUMAN | FERM_M, FERM_C, FA,<br>RhoGEF, PH, PH |
| 84 | tr J3QR65 J3QR65_HUMAN         | Myotub-related, FYVE                  |
| 85 | sp Q9NYA4 MTMR4_HUMAN          | Myotub-related, FYVE                  |
| 86 | tr Q5H9P4 Q5H9P4_HUMAN         | Ank_2, Ank2, Ank2,<br>Ank2, FYVE      |

|     |                                |                                    |
|-----|--------------------------------|------------------------------------|
| 87  | sp Q9P2R3 ANFY1_HUMAN          | Ank_2, Ank2, Ank2, Ank2, FYVE      |
| 88  | tr A0A7I2V307 A0A7I2V307_HUMAN | VHS, FYVE                          |
| 89  | tr A0A024R1I2 A0A024R1I2_HUMAN | Myotub-related, FYVE               |
| 90  | sp Q9HBF4 ZFYV1_HUMAN          | FYVE, FYVE                         |
| 91  | tr G3V5N8 G3V5N8_HUMAN         | FYVE, FYVE                         |
| 92  | tr C9JME2 C9JME2_HUMAN         | FERM_M, FERM_C, FA, RhoGEF, PH, PH |
| 93  | tr C9JL08 C9JL08_HUMAN         | FYVE                               |
| 94  | sp Q9BQ24 ZFY21_HUMAN          | FYVE, ZFYVE21_C                    |
| 95  | tr E9PDH4 E9PDH4_HUMAN         | FYVE, DEP, Cpn60_TCP1              |
| 96  | sp Q9Y2I7 FYV1_HUMAN           | FYVE, DEP, Cpn60_TCP1              |
| 97  | tr V9HWG4 V9HWG4_HUMAN         | FYVE, DEP, Cpn60_TCP1              |
| 98  | tr A0A7I2V5X2 A0A7I2V5X2_HUMAN | FYVE                               |
| 99  | tr A7E1Z6 A7E1Z6_HUMAN         | FYVE                               |
| 100 | tr Q96LK4 Q96LK4_HUMAN         | WD40, FYVE                         |
| 101 | sp Q9BQS8 FYCO1_HUMAN          | RUN, FYVE                          |
| 102 | sp Q96P53 WDFY2_HUMAN          | WD40, FYVE                         |
| 103 | tr A7E293 A7E293_HUMAN         | Beach, FYVE                        |

|     |                                |                    |
|-----|--------------------------------|--------------------|
| 104 | sp Q8IZQ1 WDFY3_HUMAN          | Beach, FYVE        |
| 105 | tr A0A024RDC2 A0A024RDC2_HUMAN | Beach, FYVE        |
| 106 | tr B4DXH4 B4DXH4_HUMAN         | PH, FYVE           |
| 107 | tr A0A7I2V5N3 A0A7I2V5N3_HUMAN | FYVE               |
| 108 | tr A0A7I2V5W6 A0A7I2V5W6_HUMAN | FYVE               |
| 109 | tr Q96P52 Q96P52_HUMAN         | FYVE               |
| 110 | tr B3KPJ0 B3KPJ0_HUMAN         | RhoGEF             |
| 111 | tr H0Y696 H0Y696_HUMAN         | RhoGEF             |
| 112 | tr A8K4R4 A8K4R4_HUMAN         | RCC1, RhoGEF       |
| 113 | tr Q6IQ41 Q6IQ41_HUMAN         | RCC1, RhoGEF       |
| 114 | sp Q96Q42 ALS2_HUMAN           | RCC1, RhoGEF, vps9 |
| 115 | tr A0A2X0SFA0 A0A2X0SFA0_HUMAN | RCC1, RhoGEF, vps9 |
| 116 | sp Q9H1K0 RBNS5_HUMAN          | FYVE, NPF          |
| 117 | tr A8K5H3 A8K5H3_HUMAN         | FYVE, NPF          |
| 118 | tr H3BRF9 H3BRF9_HUMAN         | FYVE               |
| 119 | sp Q8TCU6 PREX1_HUMAN          | RhoGEF, DEP, DEP   |

|     |                                |                      |
|-----|--------------------------------|----------------------|
| 120 | tr A0A2X0SFH1 A0A2X0SFH1_HUMAN | RhoGEF, DEP, DEP     |
| 121 | tr M0QXT1 M0QXT1_HUMAN         | RhoGEF               |
| 122 | tr B3KPZ0 B3KPZ0_HUMAN         | Ank_2                |
| 123 | tr H3BRM1 H3BRM1_HUMAN         | FYVE                 |
| 124 | tr E9PJM7 E9PJM7_HUMAN         | PH                   |
| 125 | sp Q96K21 ANCHR_HUMAN          | FYVE                 |
| 126 | tr B4E245 B4E245_HUMAN         | PH                   |
| 127 | tr E7EMB1 E7EMB1_HUMAN         | PH                   |
| 128 | tr B3KUB9 B3KUB9_HUMAN         | PH                   |
| 129 | sp Q9UH65 SWP70_HUMAN          | PH                   |
| 130 | sp Q70Z35 PREX2_HUMAN          | RhoGEF, PH, DEP, DEP |
| 131 | tr A0A2X0SZ31 A0A2X0SZ31_HUMAN | RhoGEF, PH, DEP, DEP |
| 132 | tr H3BN64 H3BN64_HUMAN         | FYVE                 |
| 133 | tr H7C3C4 H7C3C4_HUMAN         | HCO3_cotransp        |
| 134 | tr C9JRP1 C9JRP1_HUMAN         | HCO3_cotransp        |
| 135 | tr A0A0A0MST8 A0A0A0MST8_HUMAN | HCO3_cotransp        |
| 136 | tr B5M450 B5M450_HUMAN         | HCO3_cotransp        |
| 137 | tr E9PFN4 E9PFN4_HUMAN         | HCO3_cotransp        |
| 138 | sp Q9Y6M7 S4A7_HUMAN           | HCO3_cotransp        |
| 139 | tr Q5JVVY0 Q5JVVY0_HUMAN       | zf-RING_UBOX         |

|     |                                |                            |
|-----|--------------------------------|----------------------------|
| 140 | tr E7EW28 E7EW28_HUMAN         | HCO3_cotransp              |
| 141 | tr C9J240 C9J240_HUMAN         | HCO3_cotransp              |
| 142 | sp Q6U841 S4A10_HUMAN          | HCO3_cotransp              |
| 143 | sp Q13049 TRI32_HUMAN          | NHL                        |
| 144 | tr A0A024R843 A0A024R843_HUMAN | NHL                        |
| 145 | sp P52735 VAV2_HUMAN           | RhoGEF, PH,C1, SH2         |
| 146 | tr B4DFS9 B4DFS9_HUMAN         | RhoGEF, PH                 |
| 147 | tr H0Y724 H0Y724_HUMAN         | PH                         |
| 148 | tr B4E2V8 B4E2V8_HUMAN         | Sec7, PH                   |
| 149 | sp Q9UIA0 CYH4_HUMAN           | Sec7, PH                   |
| 150 | tr B2RCD2 B2RCD2_HUMAN         | Sec7, PH                   |
| 151 | tr A7E2A5 A7E2A5_HUMAN         | PH, PH, PH, RhoGAP, RA, PH |
| 152 | sp Q8WZ64 ARAP2_HUMAN          | PH, PH, PH, RhoGAP, RA, PH |
| 153 | tr A0A2X0SFS3 A0A2X0SFS3_HUMAN | PH, PH, PH, RhoGAP, RA, PH |
| 154 | tr B4DZ04 B4DZ04_HUMAN         | RhoGEF, PH                 |
| 155 | tr B4E1Y1 B4E1Y1_HUMAN         | RhoGEF, PH                 |
| 156 | tr Q5SQI7 Q5SQI7_HUMAN         | RhoGEF, PH                 |
| 157 | tr A0A2X0SFV4 A0A2X0SFV4_HUMAN | RhoGEF, PH                 |
| 158 | sp Q7Z628 ARHG8_HUMAN          | RhoGEF, PH                 |
| 159 | tr Q5SQI5 Q5SQI5_HUMAN         | RhoGEF, PH                 |

|     |                                |               |
|-----|--------------------------------|---------------|
| 160 | tr B4DS29 B4DS29_HUMAN         | HCO3_cotransp |
| 161 | sp Q2Y0W8 S4A8_HUMAN           | HCO3_cotransp |
| 162 | tr Q9NUL6 Q9NUL6_HUMAN         | Sec7, PH      |
| 163 | tr A0A0D9SFG6 A0A0D9SFG6_HUMAN | Sec7, PH      |
| 164 | sp Q6ZNE9 RUFY4_HUMAN          | RUN           |
| 165 | tr B2RBP7 B2RBP7_HUMAN         | PH            |
| 166 | sp Q8IVQ6 ZDH21_HUMAN          | DHHC          |
| 167 | tr Q15795 Q15795_HUMAN         | Sec7, PH      |
| 168 | tr C9JKV5 C9JKV5_HUMAN         | FYVE_2        |
| 169 | sp Q9P2F6 RHG20_HUMAN          | RA, RhoGAP    |
| 170 | tr A0A2X0U2C5 A0A2X0U2C5_HUMAN | RA, RhoGAP    |
| 171 | tr E9PNM3 E9PNM3_HUMAN         | I-set         |
