# Supplementary material for: The PH Domain and C-Terminal polyD Motif of Phafin2 Exhibit a Unique Concurrence in Animals
Source: MDPI journal article supplement (doi:10.3390/membranes12070696), 2022-07-07
Supplement: s1 [file s1]

**Supplementary File S1:** Human Phafin2 orthologues retrieved from Ensembl genome browser.

>*Homo\_sapiens*(Human)

MVDRLANSEANTRRISIVENCFGAAGQPLTIPGRVLIGEGVLTKLCRKKPKARQFFLFND  
ILVYGNIVIQKKKYNKQHIIPLENVTIDSIKDEGDLRNGWLIKTPTKSFAVYAATATEKS  
EWMNHINKCVTDLLSKSGKTPSNEHAAVWVPDSEATVCMRCQKAKFTPVNRRHHCRKCGF  
VVCGPCSEKRFLFPSQSSKPVRICDFCYDLLSAGDMATCQPARSDSYSQSLKSPLNDMSD  
DDDDDDSSD

>*Ficedula\_albicollis*(Collared\_flycatcher)

MVDRLANSEANTRRISIVENCFGAAGQPLTIPGRVLIGEGVLTKLCRKKPKARQFFLFND  
ILVYGNIVIQKKKYNKQHIIPLENVTIDSIQDEGDLRNGWLIKTPTKSFAVYAATATEKS  
EWMNHINKCVSDLLSKSGKTPSNEHAAVWVPDSEATVCMRCQKAKFTPVNRRHHCRKCGF  
VVCGPCSEKRFLFPSQSSKPVRICDFCYDLLSTGEMTACQSTRSDSYSQSPKSPLNDVSD  
DDDDDEDSSD

>*Ciona\_savignyi*(Pacific\_transparent\_sea\_squirt)

MVERLANTEINARRISHVEACFGSSGKPLFHPTRVLVGEGVLTKLCRKKPKQRQFFLFND  
VLVYGNIVISKRYNKQNVLSLRNVREEIPDSDTNGGAEGTEVLKNGWLIISTSKSFAV  
YAQTAMEKQEWLTHMNRCIEEEKKSGPSIDVTEQFAPAWVPDSEAECEMRCKKTRFTAL  
QRRHHCRRCGFVVCQGCSKKVVIKNQSAKPLRVCDTCLTSLANKKDNSPPQNNKLAFGD  
TSISDSESSDDTRT

>*Latimeria\_chalumnae*(Coelacanth)

MVDRLANSEANSRRIAMVESCFGAAGQPLAIPGRVLIGEGVLTKLCRKKPKARQFFLFND  
ILVYGNIVIQKKKYNKQHIIPLENVTIDSIQDEGDLRNGWLIKTPTKSFAVYAATATEKS  
EWMNHINKCVADLLMKSGKTPNSEHAAVWVPDSEASVCMRCQRVKFTPVNRRHHCRKCGF  
VVCGPCSEKRFLFPSQSSKPVRVCNFCYDLLFSAGPMSASLPSKSDSYRRSPKSSIDNVS  
DEDEDEDSSD

>*Petromyzon\_marinus*(Sea\_lamprey)

MAEPLASSEENCRIARIESCFGAAGRPLMAPGRVLVGEGTLTKLCRKGPKPRQFFLFDD

MVVYGA AVLGNRRYANQ RVLAL EAVTICTLPDEGELSNGWLMQTPAKSFKVFAATESERA  
EWIGHIERCVRELRAKRGLPPHGLEPAAWWVPDSSASACMRRQRSRFNALNRRHHCRKCG  
IVVCGACSDRRFLLPGQSSRPLRVCIDCFDSLAAAAAAAAAVTAPAGPLSSSSSDDLDSDE  
DDDDDDDDGGD

>*Lepisosteus\_oculatus*(Spotted\_gar)

MVDRLANSEANSKRIALVEGCFGTAGQPLAIPGRVLIGEGVLTCLCRKKPKARQFFLFND  
ILVYGNIVIQKKKYNKQHIIPLNVTIDSIEDEGDLRNGWLIKTPTKSFAVYAATATEKS  
EWMNHINKCVSDLLEKSGKSPSSEHA AVWVPDSEATVCMRCQKIKFTPVSRRHHCRKCGF  
VVCGPCSEKKFLLPSQSSKPVRVCEFCYEQLAGGQAASLPARSDSYSRSSKFPAPSVSDD  
DDEDDSSD

>*Myotis\_lucifugus*(Little\_brown\_bat)

MVDRLANSEANTRRINIVENCFGAAGQPLTIPGRVLIGEGVLTCLCRKKPKARQFFLFND  
ILVYGNIVIQKKKYNKQHIIPLNVTIDSIKDEGDLRNGWLIKTPTKSFAVYAATATEKS  
EWMNHINKCVTDLLSKSGKTPSNEHA AVWVPDSEATVCMRCQKAKFTPVNRRHHCRKCGF  
VVCGPCSEKRFLPSQSSKPVRICDFCYDLLSTGDMASCQPTRSDSYSQSLKSPLNDVSD  
DDDDDDSSD

>*Pongo\_pygmaeus*(Bornean\_orangutan)

MVDRLANSEANTRRISIVENCFGAAGQPLTIPGRVLIGEGVLTCLCRKKPKARQFFLFND  
ILVYGNIVIQKKKYNKQHIIPLNVTIDSIKDEGDLRNGWLIKTPTKSFAVYAATATEKS  
EWMNHINKCVTDLLSKSGKTPSNEHA AVWVPDSEATVCMRCQKAKFTPVNRRHHCRKCGF  
VVCGPCSEKRFLPSQSSKPVRICDFCYDLLSTGDMATCQPARSDSYSQSLKSPLNDMSD  
DDDDDDSSD

>*Dichotomycere\_nigroviridis*(Green\_spotted\_puffer)

MVDRLANSEANSKRIAFVESCFGAAGQPLAIPGRVLIGEGILTCLCRKKPKTRQFFLFND  
ILVYGNILIQKKKYNKQHIIPLLEGVTIDTVPDEGELRNGWLIKTPTKSFAVYAATATEKS  
EWMNHIGKCVNDLLQKSGKAPTGEHA AVWVPDSEATVCMRCQKVKFTPVSRRHHCRKCGL  
VVCGPCSEKKFLLPSQSSKPVRVCEFCYVQLMAGGVAPRSDSMSRPAATFSSSNLCWDEG  
SSSSSD

>*Pteropus\_vampyrus*(Large\_flying\_fox)

MVDRLANSEANTRRINIVENCFGAAGQPLTIPGRVLIGEGVLTCLCRKKPKARQFFLFND

ILVYGNIVIQKKKYNKQHIIPLENVTIDSIKDEGDLRNGWLIKTPTKSFAVYAATATEKS  
EWMNHINKCVTDLLSKSGKTPSNEHAAVWVPDSEATVCMRCQKAKFTPVNRRHHCRKCGF  
VVCGPCSEKRFLFPSQSSKPVRICDFCYDLLSTGDLATCQPTRSDSYSQSLKSPLNDVSD  
DDDDDDSSD

>*Loxodonta\_africana*(African\_bush\_elephant)

MVDRLANSEANTRRISIVENCFGAAGQPLTIPGRVLIGEGVLTCLCRKKPKARQFFLFND  
ILVYGNIVIQKKKYNKQHIIPLENVTIDSIKDEGDLRNGWLIKTPTKSFAVYAATATEKS  
EWMNHINKCVTDLLSKSGKTPSNEHAAVWVPDSEATVCMRCQKAKFTPVNRRHHCRKCGF  
VVCGPCSEKRFLFPSQSSKPVRICDFCYDLLSTGDMDCQPTRSDSYSQSLKSPLNDVSD  
DDDDDDSSD

>*Procavia\_capensis*(Rock\_hyrax)

MVDRLANSEANTRRISIVENCFGAAGQPLTIPGRVLIGEGVLTCLCRKKPKARQFFLFND  
ILVYGNIVIQKKKYNKQHIIPLENVTIDSIKDEGDLRNGWLIKTPTKSFAVYAATATEKS  
EWMNHINKCVTDLLSKSGKTPSNEHAAVWVPDSEATVCMRCQKAKFTPVNRRHHCRKCGF  
VVCGPCSEKRFLFPSQSSKPVRICDFCYDLLSTGDMASRSDSYSQSLKSPLNDVSDDDDD  
DDSSD

>*Ciona\_intestinalis*(Vase\_tunicate)

MVERLANTEINARRISHVESCFGSSGKPLFHPSRVLVGEGVLTCLCRKKPKARQFFLFND  
VLVYGNIVINKKRYNKQSVLSLRNVREEIPDNEETAADGSDTLKNGWLIISPSKSFAV  
YAQTAMEKEEWLTHMTRCIDEEKKSGPSISVTDQFAPTWVPDSEAVVCMRCKKTRFTTL  
QRKHHCRKCGLVVCNACSTKKCIHQHSAKPLRVCDVCYQSLQNGSNTPEVTASNVPNNK  
LAFGDTSYSSDSESSNEA

>*Gasterosteus\_aculeatus*(Three\_spined\_stickleback)

MVDRLANSEANSKRIAVVEGCFGAAGQPLAIPGRVLIGEGVLTCLCRKKPKARQFFLFND  
ILVYGNIMIQKKKYNKQHIIPLESVTIDKVPDEGDLRNGWLIKTPTKSFAVYAATATEKS  
EWMNHIGKCVEDLLLKSGKAPTGEHAAVWVPDSEATVCMRCQKVKFTPVSRRHHCRKCGF  
VVCGPCSERKHLLPSQSSKPVRVCEFCFVQLTAEGAAARSDSLGRLGSKFHNMSDDDDDD  
DSSD

>*Tursiops\_truncatus*(Bottlenose\_dolphins)

MVDRLANSEANTRRINIVENCFGAAGQPLTIPGRVLIGEGVLTCLCRKKPKARQFFLFND

ILVYGNIVIQKKKYNKQHIIPLENVTIDSIKDEGDLRNGWLIKTPTKSFAVYAATATEKS  
EWMNHINKCVTDLLSKSGKTPSNEHAAVWVPDSEATVCMRCQKAKFTPVNRRHHCRKCGF  
VVCGPCSEKRFLFPSQSSKPVRICDFCYDLLSTGDMATCQPTRSDSYSQSLKSTLNDVSD  
DDDDDDSSD

>*Poecilia\_formosa*(Amazon\_molly)

MVDRLANSEANSKRIGLVESCFGAAGQPLAIPGRVLIGEGVLTCLCRKKPKARQFFLFND  
ILVYGNIVIQKKKYNKQHIIPLLEGVTIDTVPDEGELRNGWLIKTPTKSFAVYAATATEKS  
EWMNHIGKCVRELLQKSGKSPTGEHAAVWVPDSEATVCMRCKKVKFTPVSRRHHCRKCGY  
VVCGPCSEKKFLFPSQSSKPVRVCEHCYGMLSGSLGPRSEMSRPGANFNNTLSDDDDD  
DDSSD

>*Mustela\_putorius*(Ferret)

MVDRLANSEANTRRINIVENCFGAAGQPLTIPGRVLIGEGVLTCLCRKKPKARQFFLFND  
ILVYGNIVIQKKKYNKQHIIPLENVTIDSIKDEGDLRNGWLIKTPTKSFAVYAATATEKS  
EWMNHINKCVTDLLSKSGKTPSNEHAAVWVPDSEATVCMRCQKAKFTPVNRRHHCRKCGF  
VVCGPCSEKRFLFPSQSSKPVRICDFCYDLLSTGDMATCQPTRSDSYSQSLKSPLNDVSD  
DDDDDDSSD

>*Otolemur\_garnettii*(Northern\_greater\_galago)

MVDRLANSEANTRRISIVENCFGAAGQPLTIPGRVLIGEGVLTCLCRKKPKARQFFLFND  
ILVYGNIVIQKKKYNKQHIIPLENVTIDSIKDEGDLRNGWLIKTPTKSFAVYAATATEKS  
EWMNHINKCVTDLLSKSGKTPSNEHAAVWVPDSEATVCMRCQKAKFTPVNRRHHCRKCGF  
VVCGPCSEKRFLFPSQSSKPVRICDFCYDLLSTGDLATCQPTRSDSYGQSLKSSLNDVSD  
DDDDDDSSD

>*Chlorocebus\_sabaeus*(Green\_monkey)

MVDRLANSEANTRRISIVENCFGAAGQPLTIPGRVLIGEGVLTCLCRKKPKARQFFLFND  
ILVYGNIVIQKKNYNKQHIIPLENVTIDSIKDEGDLRNGWLIKTPTKSFAVYAATATEKS  
EWMNHINKCVTDLLSKSGKTPSNEHAAVWVPDSEATVCMRCQKAKFTPVNRRHHCRKCGF  
VVCGPCSEKRFLFPSQSSKPVRICDFCYDLLSTGDMATCQPARSDDSYSQSLKSPLNDMSD  
DDDDDDSSD

>*Dasypus\_novemcinctus*(Nine\_banded\_armadillo)

MVDRLANSEANTRRISIVENCFGAAGQPLTIPGRVLIGEGVLTCLCRKKPKARQFFLFND

ILVYGNIVIQKKKYNKQHIIPLENVTIDSIKDEGDLRNGWLIKTPTKSFAVYAATATEKS  
EWMNHINKCVTDLLSKSGKTPSNEHAAVWVPDSEATVCMRCQKAKFTPVNRRHHCRKCGF  
VVCGPCSEKRFLLPSSKPVRICDFCYDLLSTGDMAACQPNRSDSYSHSLKSPLNDVSD  
DDDDDDSSD

>*Tupaia\_belangeri*(Northern\_treeshrew)

MVDRLANSEANTRRISIVENCFGAAGQPLTIPGRVLIGEGVLTKLCRKKPKARQFFLFND  
ILVYGNIVIQKKKYNKQHIIPLENVTIDSIKDEGDLRNGWLIKTPTKSFAVYAATATEKS  
EWMNHINKCVTDLLSKSGKTPSNEHAAVWVPDSEATVCMRCQKAKFTPVNRRHHCRKCGF  
VVCGPCSEKRFLLPSSKPVRICDFCYDLLSTGDMATCQQPTRSDSYSQSLKSPLNDVS  
DDDDDDSSD

>*Anolis\_carolinensis*(Carolina\_anole)

MVDRLANSEANTRRISIVENCFGAAGQPLTIPGRVLIGEGVLTKLCRKKPKARQFFLFND  
ILVYGNIVIQKKKYNKQHIIPLENVTIESIQDEGDLRNGWLIKTPTKSFAVYAATATEKS  
EWMNHINKCVSDLLSKSGKTPSNEHAAVWVPDSEATICMRCQKAKFTPVNRRHHCRKCGF  
VVCGPCSEKRFLIPSQSSKPVRICDFCYDLLSTGEMATCQSGRSDSYSPSLKPPLNDISD  
DDDDDDSSD

>*Pelodiscus\_sinensis*(Chinese\_softshell\_turtle)

MVDRLANSEANTRRISIVENCFGAAGQPLTIPGRVLIGEGVLTKLCRKKPKARQFFLFND  
ILVYGNIVIQKKKYNKQHIIPLENVTIDSIQDEGDLRNGWLIKTPTKSFAVYAATATEKS  
EWMNHINKCVSDLLSKSGKTPSNEHAAVWVPDSEATVCMRCQKAKFTPVNRRHHCRKCGF  
VVCGPCSEKRFLLPNQSSKPVRICDFCYDLLSTGEMTACQPTRSDSYSQSPKSPINDVSD  
DDDDDDSSD

>*Ochotona\_princeps*(American\_pika)

MVDRLANSEANTRRISIVENCFGAAGQPLTIPGRVLIGEGVLTKLCRKKPKARQFFLFND  
ILVYGNIVIQKKKYNKQHIIPLENVTIDSIKDEGDLRNGWLIKTPTKSFAVYAATATEKS  
EWMNHINKCVTDLLSKSGKTPSNEHAAVWVPDSEATVCMRCQKAKFTPVNRRHHCRKCGF  
VVCGPCSEKRFLLPSSKPVRICDFCYDLLSTGDMATCQPARSDSYSQSLKSPLNDVSD  
DDDDDDSSD

>*Erinaceus\_europaeus*(European\_hedgehog)

MVDRLANSEANTRRINIVENCFGAAGQPLTIPGRVLIGEGVLTKLCRKKPKARQFFLFND

ILVYGNIVIQKKKYNKQHIIPLENVTIDSIKDEGDLRNGWLIKTPTKSFAVYAATATEKS  
EWMNHINKCVTDLLSKSGKTPSNEHAAVWVPDSEATVCMRCQKAKFTPVNRRHHCRKCGF  
VVCGPCSEKRFLFPSQSSKPVRICDFCYDLLSTGDMATCQPARSDSYSQSLKSPLNDVSD  
DDDDDDSSD

>*Vicugna\_pacos*(Alpaca)

MVDRLANSEANTRRINIVENCFGAAGQPLTIPGRVLIGEGVLTCLCRKKPKARQFFLFND  
ILVYGNIVIQKKKYNKQHIIPLENVTIDSIKDEGDLRNGWLIKTPTKSFAVYAATATEKS  
EWMNHINKCVTDLLSKSGKTPSNEHAAVWVPDSEATVCMRCQKAKFTPVNRRHHCRKCGF  
VVCGPCSEKRFLFPSQSSKPVRICDFCYDLLSAGDMATCQPARSDSYSQSLKSPLNDVSD  
DDDDDDSSD

>*Sorex\_araneus*(Common\_shrew)

MVDRLANSEANTRRINIVENCFGAAGQPLTIPGRVLIGEGVLTCLCRKKPKARQFFLFND  
ILVYGNIVIQKKKYNKQHIIPLENVTIDSIKDEGDLRNGWLIKTPTKSFAVYAATATEKS  
EWMNHINKCVTDLLSKSGKTPSNEHAAVWVPDSEATVCMRCQKAKFTPVSRRHHCRKCGF  
VVCGSCSEKRFLFPSQSSKPVRICDFCYDLLSTGDSGLGQPTRSDSYSQSLKSPLNDASD  
DDDDDDSSD

>*Choloepus\_hoffmanni*(Hoffmann's\_two-toed\_sloth)

MVDRLANSEANTRRINIVENCFGAAGQPLTIPGRVLIGEGVLTCLCRKKPKARQFFLFND  
ILVYGNIVIQKKKYNKQHIIPLENVTIDSIKDEGDLRNGWLIKTPTKSFAVYAATATEKS  
EWMNHINKCVTDLLSKSGKTPSNEHA

>*Macropus\_eugenii*(Tammar\_wallaby)

MVDRLANSEANTRRISIVENCFGAAGQPLTIPGRVLIGEGVLTCLCRKKPKARQFFLFND  
ILVYGNIVIQKKKYNKQHIIPLENVTIDSIKDEGDLRNGWLIKTPTKSFAVYAATATEKS  
EWMNHINKCVTDLLSKSGKTPSNEHAAVWVPDSEATVCMRCQKAKFTPVNRRHHCRKCGF  
VVCGPCSEKRFLFPSQSSKPVRICDFCDLLSSGDLATCQPSRSDSYSQSPKSPLNNVSD  
DEDDDEDSSD

>*Heterocephalus\_glaber\_1\_*(Naked\_mole-rat)

MVDRLANSEANTRRIGIVENCFGAAGQPLTIPGRVLIGEGVLTCLCRKKPKARQFFLFND  
ILVYGNIVIQKKKYNKQHIIPLENVTIDSIKDEGDLRNGWLIKTPTKSFAVYAATATEKS  
EWMNHINKCVTDLLSKSGKTPVNEHAAVWVPDSEATVCMRCQKAKFTPVNRRHHCRKCGY

VVCGPCSEKRFLFPSQSSKPVRICDFCYDLLSTGDMATCQGRSDSYSQSLKSSLNNVSD  
DEDDDDSSD

>*Heterocephalus\_glaber\_2\_*(Naked\_mole-rat)

MDRLTNSEANTRRIGIVESCFAANQPLTIPGRVLIGEGPKARQFFLFNDILVNGNIVVQ  
EKKYNKQHIIPLQNVITIDSVKDEGDLRNGWLIKTPTKLFAVYAATATEKSEWMNHINKCV  
TDLLSKSGKTPINEHTAVWVPDSEATVCMRCQKAKFTPVNPLHHCRKCGHVVCGPCSEKR  
FLLPSQSSKPVRICDFCYDLLSTGDMATCQPARSDSVYSQSLKSSLNNVSDDEDDDDSSA

>*Chinchilla\_lanigera*(Long-tailed\_chinchilla)

MVDRLANSEANTRRIGIVENCFAAGQPLTIPGRVLIGEGVLTKLCRKKPKARQFFLFND  
ILVYGNIVIQKKKYNKQHIIPLENVTIDSIKDEGDLRNGWLIKTPTKSFAVYAATATEKS  
EWMNHINKCVTDLLSKSGKTPINEHAAVWVPDSEATVCMRCQKAKFTPVNRRHHCRKCGF  
VVCGPCSEKRFLFPSQSSKPVRICDFCYDLLSTGDMAACQPARSDSYSQSLKSPLNDVSD  
DDDDDDSSD

>*Cavia\_porcellus*(Guinea\_pig)

MVDRLANSEANTRRIGIVENCFAAGQPLTIPGRVLIGEGVLTKLCRKKPKARQFFLFND  
ILVYGNIVIQKKKYNKQHIIPLENVTIDSIKDEGDLRNGWLIKTPTKSFAVYAATATEKS  
EWMNHINKCVTDLLSKSGKTPINEHAAVWVPDSEATVCMRCQKAKFTPVNRRHHCRKCGF  
VVCGPCSEKRFLFPSQSSKPVRICDFCYDLLSTGDMATCQPARSDSYSQSLKSPLNNVSD  
DDDDDDSSD

>*Ictidomys\_tridecemlineatus*(Thirteen-lined\_ground\_squirrel)

MVDRLANSEANTRRISIVENCFAAGQPLTIPGRVLIGEGVLTKLCRKKPKARQFFLFND  
ILVYGNIVIQKKKYNKQHIIPLENVTIDSIKDEGDLRNGWLIKTPTKSFAVYAATATEKS  
EWMNHINKCVTDLLSKSGKTPSNEHAAVWVPDSEATVCMRCQKAKFTPVNRRHHCRKCGF  
VVCGPCSEKRFLFPSQSSKPVRICDFCYDLLSTGDMATCQPTRSDSYSQSLKSPLNDVSD  
DDDDDDSSD

>*Heterocephalus\_glaber*(Naked\_mole-rat)

MVDRLANSEANTRRIGIVENFVIGEGVLTKLCRKKPKARQFFLFNDIFVYGNIVIQKKKY  
NKQHIIPLENVTIESIKDERDLRNGWLIKTPTKSFAVYAATATEKSEWMNRINKCVTDLL  
SKSGKTPINERAAVWVPDSEAPVCMRCQKAKFTPVSRRHHCRKCGYVVCGPCSEKRFLLP  
RQSSKPVRICDFCYDLLSTGDMAACQPARSDSIYSQSLKSSLNNVSDDEDDDDSSD

>*Rattus\_norvegicus*(Brown\_rat)

MVDRLANSEANTRRISIVESCFGAAGQPLTIPGRVLIGEGVLTCLCRKKPKARQFFLFND  
ILVYGNIVIQKKKYNKQHIIPLENVTIDSIKDEGELRNGWLIKTPTKSFAVYAATATEKS  
EWMNHINKCVSDLLSKSGKTPSNEHAADVVPDSEATVCMRCQKAKFTPVNRRHHCRKCGF  
VVCGPCSEKRFLFPSQSSKPVRICDFCYDLLSTGDMACQPTRSDSYSQSLKSPLNDASD  
DDDDDDSSD

>*Clethrionomys\_glaireolus*(Vole)

MVDRLANSEANSRRISIVESCFGAAGQPLTIPGRVLIGEGVLTCLCRKKPKARQFFLFND  
ILVYGNIVIQKKKYNKQHIIPLENVTIDSIKDEGELRNGWLIKTPTKSFAVYAATATEKS  
EWMNHINKCVTDLLSKSGKTPSSEHAADVVPDSEATVCMRCQKAKFTPVNRRHHCRKCGF  
VVCGPCSEKRFLFPSQSSKPVRICDFCYELLSTGDMACQPARSDDSYSQSLKPPLNDVSD  
DDDDDDSSD

>*Cricetulus\_griseus*(Chinese\_hamster)

MVDRLANSEANTRRISIVENCFAAGQPLTIPGRVLIGEGVLTCLCRKKPKARQFFLFND  
ILVYGNIVIQKKKYNKQHIIPLENVTIDSIKDEGELRNGWLIKTPTKSFAVYAATATEKS  
EWMNHINKCVTDLLSKSGKTPSSEHAADVVPDSEATVCMRCQKAKFTPVNRRHHCRKCGF  
VVCGPCSEKRFLLPNQSSKPVRICDFCYDLLSTGDMSSGQPTRSDSYSQSLKSPLNDVSD  
DDDDDDSSD

>*Cercocebus\_atys*(Sooty\_mangabey)

MVDRLANSEANTRRISIVENCFAAGQPLTIPGRVLIGEGVLTCLCRKKPKARQFFLFND  
ILVYGNIVIQKKKYNKQHIIPLENVTIDSIKDEGDLRNGWLIKTPTKSFAVYAATATEKS  
EWMNHINKCVTDLLSKSGKTPSNEHAADVVPDSEATVCMRCQKAKFTPVNRRHHCRKCGF  
VVCGPCSEKRFLFPSQSSKPVRICDFCYDLLSTGDMATCQPARSDDSYSQSLKSPLNDMSD  
DDDDDDSSD

>*Cebus\_imitator*(White-faced\_capuchin)

MVDRLANSEANTRRISIVENCFAAGQPLTIPGRVLIGEGVLTCLCRKKPKARQFFLFND  
ILVYGNIVIQKKKYNKQHIIPLENVTIDSIKDEGDLRNGWLIKTPTKSFAVYAATATEKS  
EWMNHINKCVTDLLSKSGKTPSNEHAADVVPDSEATVCMRCQKAKFTPVNRRHHCRKCGF  
VVCGPCSEKRFLFPSQSSKPVRICDFCYDLLSTGDMATCQPARSDDSYSQSLKSPLNDMSD  
DDDDDDSSD



>*Macaca nemestrina*(Southern\_pig-tailed\_macaque)

MVDRLANSEANTRRISIVENCFGAAGQPLTIPGRVLIGEGVLTCLCRKKPKARQFFLFND  
ILVYGNIVIQKKKYNKQHIIPLENVTIDSIKDEGDLRNGWLIKTPTKSFAVYAATATEKS  
EWMNHINKCVTDLLSKSGKTPSNEHAADVWVPDSEATVCMRCQKAKFTPVNRRHHCRKCGF  
VVCGPCSEKRFLFPSQSSKPVRICDFCYDLLSTGDMATCQPARSDSYSQSLKSPLNDMSD  
DDDDDDSSD

>*Nomascus leucogenys*(Northern\_white-cheeked\_gibbon)

MVDRLANSEANTRRISIVENCFGAAGQPLTIPGRVLIGEGVLTCLCRKKPKARQFFLFND  
ILVYGNIVIQKKKYNKQHIIPLENVTIDSIKDEGDLRNGWLIKTPTKSFAVYAATATEKS  
EWMNHINKCVTDLLSKSGKTPSNEHAADVWVPDSEATVCMRCQKAKFTPVNRRHHCRKCGF  
VVCGPCSEKRFLFPSQSSKPVRICDFCYDLLSTGDMATCQPARSDSYSQSLKSPLNDMSD  
DDDDDDSSD

>*Capra aegagrus*(Goat)

MVDRLANSEANTRRINIVENCFGAAGQPLTIPGRVLIGEGVLTCLCRKKPKARQFFLFND  
ILVYGNIVIQKKKYNKQHIIPLENVTIDSIKDEGDLRNGWLIKTPTKSFAVYAATATEKS  
EWMNHINKCVTDLLSKSGKTPSNEHAADVWVPDSEATVCMRCQKAKFTPVNRRHHCRKCGF  
VVCGPCSEKRFLFPSQSSKPVRICDFCYDLLSTGDVAACQPARSDSYSQSLQPPLNDVSD  
DDDDDDSSD

>*Sorex araneus*(Shrews)

MVDRLANSEANTRRISIVENCFGAAGQPLTIPGRVLIGEGVLTCLCRKKPKARQFFLFND  
ILVYGNIVIQKKKYNKQHIIPLENVTIDSIKDEGELRNGWLIKTPTKSFAVYAATATEKS  
EWMNHINKCVTDLLSKSGKTPSNEHAADVWVPDSEATVCMRCQKAKFTPVNRRHHCRKCGF  
VVCGPCSEKRFLFPSQSSKPVRICDFCYDLLSTGDMAACQPTRSDSYSQSLKSPLNDASD  
DDDDDDSSD

>*Mus spretus*(Algerian\_mouse)

MVDRLANSEANTRRISIVENCFGAAGQPLTIPGRVLIGEGVLTCLCRKKPKARQFFLFND  
ILVYGNIVIQKKKYNKQHIIPLENVTIDSIKDEGELRNGWLIKTPTKSFAVYAATATEKS  
EWMNHINKCVTDLLSKSGKTPSNEHAADVWVPDSEATVCMRCQKAKFTPVNRRHHCRKCGF  
VVCGPCSEKRFLFPSQSSKPVRICDFCYDLLSTGDMAACQPTRSDSYSQSLKSPLNDASD  
DDDDDDSSD

>*Mus\_caroli*(Ryukyu\_mouse)

MVDRLANSEANTRRISIVENCFGAAGQPLTIPGRVLIGEGVLTKLCRKKPKARQFFLFND  
ILVYGNIVIQKKKYNKQHIIPLENVTIDSIKDEGELRNGWLIKTPTKSFAVYAATATEKS  
EWMNHINKCVTDLLSKSGKTPSNEHAADVWVPDSEATVCMRCQKAKFTPVNRRHHCRKCGF  
VVCGPCSEKRFLFPSQSSKPVRICDFCYDLLSTGDMACQPTRSDSYSQSLKSPLNDASD  
DDDDDDSSD

>*Eptatretus\_burgeri*(Inshore\_hagfish)

MVDRLVNSEGNRRIAAVESCFGAAGQPLAAPGRVLVGEGLTKQCRKGPKPRQFFLFND  
LLVYGAVVLSRRRYAGQRIIPLEQVSIRAVPDEGDLHNGWLIQTPAKSFKVFAATALERT  
EWMSHIERCVRDQLDRKRRDKSTVDEPAADVWVPDASASTCMRCHRTFTALNRRHHCRKC  
GFVVCAACSEHRHLIPQQSSRPLRVCQPCYEDLSANSHNSSHNTSRRGSDGPVPCPGGLD  
SSDEDSSDSGEEIGSSLPGYTTFYS

>*Panthera\_tigris*(Tiger)

MVDRLANSEANTRRINIVENCFGAAGQPLTIPGRVLIGEGVLTKLCRKKPKARQFFLFND  
ILVYGNIVIQKKKYNKQHIIPLENVTIDSIKDEGDLRNGWLIKTPTKSFAVYAATATEKS  
EWMNHINKCVTDLLSKSGKTPSNEHAADVWVPDSEATVCMRCQKAKFTPVNRRHHCRKCGF  
VVCGPCSEKRFLFPSQSSKPVRICDFCYDLLSTGDMATCQPTRSDSYSQSLKSPLNDVSD  
DDDDDDSSD

>*Danio\_rerio*(Zebrafish)

MVDRLANSEANSKRIGVVEACFGTAGQPLAIPGRVLIGEGVLTKLCRKRPKARQFFLFND  
ILVYGNIVIQKKKYNKQHIIPLESVTIDTVEDEGELRNGWLIKTPTKSFAVYAATATEKS  
EWMSHINKCVSDLLEKSGKSPTGEHAADVWVPDSEATVCMRCQKMKFTPVNRRHHCRKCGF  
VVCGPCSEKKFLLFPSQSSKPVRVCEFCYKQLSTGATLPPRSDSYSRQGSDFGSNNISDDD  
DDDDSSD

>*Cyprinodon\_variegatus*(Sheepshead\_minnow)

MVDRLANSEANSKRIGLVESCFGAAGQPLAIPGRVLIGEGVLTKLCRKKPKARQFFLFND  
ILVYGNIVIQKKKYNKQHIIPLESVTIDTVPDEGELRNGWLIKTPTKSFAVYAATATEKS  
EWMNHIGKCVRELLQKSGKSPTGEHAADVWVPDSEATVCMRCKKVKFTAVSRRHHCRKCGY  
VVCGPCSDKKFLLFPSQSSKPVRVCEHCYAMLGSLGPRSDSITRPGANFNNTLSDDDEDE  
DDSSD

>*Amphilophus\_citrinellus*(Midas\_cichlid)

MVDRLANSEANSKRIALVENCFGAAGQPLAIPGRVLIGEGVLTKLCRKKPKARQFFLFND  
ILVYGNIVIQKKKYNKQHIIPLESVTIDTVPDEGDLRNGWLIKTPTKSFAVYAATATEKS  
EWMNHIGKCVGDLLQKSGKSPTGEHAAVWVPDSEASVCMRCKKVKFTPVSRRHHCRKCGF  
VVCGPCSEKKYLLPSQSSKPVRVCEYCYEQLTSVNLQQHSDTITRPGSKFNSSNLSDDDD  
DDSSD

>*Oryzias\_dancena*(Indian\_medaka)

MQPDDLDTLQSVIFEYEREIYLSNIKKEPEQCEVKMVDRLANSEANSKRIGMVESCFGAA  
GQPLAIPGRVLIGEGVLTKLCRKKPKARQFFLFNDILVYGNIVIQKKKYNKQHIIPLESV  
TIDTVPDEGDLRNGWLIKTPTKSFAVYAATGTEKCEWMNHIGKCVRDLLQKSGKSPTGEH  
AAVWVPDSEAPICMRCEKVKFTPVIRRHCRKCGYVVCGPCSEKKYLIPSQSSKPVRVCE  
YCYSQLTSGSHAPRSDSNNWGESRYNNHLSDDDEDEDSSD

>*Stegastes\_partitus*(Bicolor\_damselfish)

MVDRLANSEANSKRIAVVEGCFGAGQPLAIPGRVLIGEGVLTKLCRKKPKARQFFLFND  
ILVYGNIVIQKKKYNKQHIIPLESVTIDTVPDEGDLRNGWLIKTPTKSFAVYAATATEKS  
EWMNHIGKCVGDLLQKSGKSPTGEHAAVWVPDSEASVCMRCQKVKFTPVSRRHHCRKCGF  
VVCGPCSEKKYLLPSQSSKPVRVCEYCYVQLTSGSLAPRSDSISRSKFNSNNLSDDDED  
DSSD

>*Amphiprion\_percula*(Orange\_clownfish)

MVDRLANSEANSKRIAVVESCFGAGQPLAIPGRVLIGEGVLTKLCRKKPKARQFFLFND  
ILVYGNIVIQKKKYNKQHIIPLESVTIDTVPDEGDLRNGWLIKTPTKSFAVYAATATEKS  
EWMNHIGKCVGDLLQKSGKSPTGEHAAVWVPDSEASVCMRCQKVKFTPVSRRHHCRKCGF  
VVCGPCSEKKYLLPSQSSKPVRVCEYCYLQLTSGSLGPRSDSISRPGSKFNSNNLSDDDED  
EDSSD

>*Fundulus\_heteroclitus*(Mummichog)

MVDRLANSEANSKRIGLVESCFGAGQPLAIPGRVLIGEGVLTKLCRKKPKARQFFLFND  
ILVYGNIVIQKKKYNKQHIIPLESVTIDTVQDEGELRNGWLIKTPTKSFAVYAATATEKS  
EWMNHIGKCVRELLQKSGKSPTGEHAAVWVPDSEATVCMRCKKVKFTPVSRRHHCRKCGY  
VVCGPCSEKKFLLPSQSSKPVRVCEHCYGVLSGSLGPNADSLSRPGLNFNNTLSDDDDDD  
DSSD

>*Maylandia\_zebra*(Zebra\_mbuna)

MVDRLANSEANSKRIAVVESCFGAAGQPLAIPGRVLIGEGVLTCLCRKKPKARQFFLFND  
ILVYGNIVIQKKKYNKQHIIPLESVTIDTVPDEGDLRNGWLIKTPTKSFAVYAATATEKS  
EWMNHIGKCVGDLLQKSGKSPTGEHAAVWVPDSEASVCMRCKKVKFTPVSRRHHCRKCGF  
VVCGPCSEKKYLLPSQSSKPVRVCEHCYEQLTSVNQARSDSITRPGSKFHSNNLSDDDDDD  
DDSSD

>*Astatotilapia\_calliptera*(Eastern\_happy)

MVDRLANSEANSKRIAVVESCFGAAGQPLAIPGRVLIGEGVLTCLCRKKPKARQFFLFND  
ILVYGNIVIQKKKYNKQHIIPLESVTIDTVPDEGDLRNGWLIKTPTKSFAVYAATATEKS  
EWMNHIGKCVGDLLQKSGKSPTGEHAAVWVPDSEASVCMRCKKVKFTPVSRRHHCRKCGF  
VVCGPCSEKKYLLPSQSSKPVRVCEHCYEQLTSVNQARSDSITRPGSKFHSNNLSDDDDDD  
DDSSD

>*Oryzias\_latipes*(Japanese\_rice\_fish)

MVDRLANSEANSKRIGMVESCFGAAGQPLAIPGRVLIGEGVLTCLCRKKPKARQFFLFND  
ILVYGNIVIQKKKYNKQHIIPLESVTIDTVPDEGDLRNGWLIKTPTKSFAVYAATATEKC  
EWMNHIGKCVKDLLQKSGKSPTGEHAAVWVPDSEASVCMRCLKVKFTAVNRRHHCRKCGY  
VVCNPCSEKKYLLPSQSSKPVRVCEFCYAQLTSGSLAPCSDSNSWSESRYNNNHLSDDED  
EDDSSD

>*Amphiprion\_ocellaris*(Clownfish)

MVDRLANSEANSKRIAVVESCFGAAGQPLAIPGRVLIGEGVLTCLCRKKPKARQFFLFND  
ILVYGNIVIQKKKYNKQHIIPLESVTIDTVPDEGDLRNGWLIKTPTKSFAVYAATATEKS  
EWMNHIGKCVGDLLQKSGKSPTGEHAAVWVPDSEASVCMRCQKVKFTPVSRRHHCRKCGF  
VVCGPCSEKKYLLPSQSSKPVRVCEYCYLQLTSGSLGPRSDSISRPGSKFNSNNLSDDDED  
EDDSSD

>*Xiphophorus\_maculatus*(Southern\_platyfish)

MVDRLANSEANSKRIGLVESCFGAAGQPLAIPGRVLIGEGVLTCLCRKKPKARQFFLFND  
ILVYGNIVIQKKKYNKQHIIPLEGVTIDTVPDDGELRNGWLIKTPTKSFAVYAATATEKS  
EWMNHIGKCVRELLQKSGKSPTGEHAAVWVPDSEATVCMRCKKVKFTPVSRRHHCRKCGY  
VVCGPCSEKKFLLPSQSSKPVRVCEHCYGMLSGSLGRQSEMSRSGANFNNTLSDDDDDD  
DSSD

>*Neolamprologus brichardi*(Lyretail\_cichlid)

MVDRLANSEANSKRIAVVESCFGAAGQPLAIPGRVLIGEGVLTCLCRKKPKARQFFLFND  
ILVYGNIVIQKKKYNKQHIIPLESVTIDTVPDEGDLRNGWLIKTPTKSFAVYAATATEKS  
EWMNHIGKCVGDLLQKSGKSPTGEHAAVWVPDSEASVCMRCKKVKFTPVSRRHHCRKCGY  
VVCGPCSEKKYLLPSQSSKPVRVCEHCYDQLTSVNQARSDSITRPGSKFHSNNLSDDDDDD  
DDSSD

>*Scophthalmus maximus*(Turbot)

MVDQLAKSEANSKRIAVVEGCFGAAGQPLAIPGRVLIGEGVLTCLCRKKPKARQFFLFND  
ILVYGNIVIQKKKYNKQHIIPLESVTIDTVPDEGDLRNGWLIKTPTKSFAVYAATATEKS  
EWMNHIGKCVGDLLQKSGKAPTGEHAAVWVPDSEATVCMRCQKVKFTPVSRRHHCRKCGY  
VVCGPCSEKKYLLPSQSSKPVRVCEYCFVQLTSGGLAVRSDSFGRMGSKFNNLSDDDDDED  
DSSD

>*Pundamilia nyererei*(Makobe\_Island\_cichlid)

MVDRLANSEANSKRIAVVESCFGAAGQPLAIPGRVLIGEGVLTCLCRKKPKARQFFLFND  
ILVYGNIVIQKKKYNKQHIIPLESVTIDTVPDEGDLRNGWLIKTPTKSFAVYAATATEKS  
EWMNHIGKCVGDLLQKSGKSPTGEHAAVWVPDSEASVCMRCKKVKFTPVSRRHHCRKCGF  
VVCGPCSEKKYLLPSQSSKPVRVCEHCYEQLTSVNQARSDSITRPGSKFHSNNLSDDDDDD  
DDSSD

>*Vulpes vulpes*(Red\_fox)

MVDRLANSEANTRRINIVENCFGAAGQPLTIPGRVLIGEGVLTCLCRKKPKARQFFLFND  
ILVYGNIVIQKKKYNKQHIIPLENTIDSIKDEGDLRNGWLIKTPTKSFAVYAATATEKS  
EWMNHINKCVTDLLSKSGKTPSNEHAAVWVPDSEATVCMRCQKAKFTPVNRRHHCRKCGF  
VVCGPCSEKRFLPSQSSKPVRICDFCYDLLSTGDMATCQPARSDSYSQSLKSPLNDVSD  
DDDDDDSSD

>*Gallus gallus*(Chicken)

MVDRLANSEANTRRISIVENCFGAAGQPLTIPGRVLIGEGVLTCLCRKKPKARQFFLFND  
ILVYGNIVIQKKKYNKQHIIPLENTIDSIQDEGDLRNGWLIKTPTKSFAVYAATATEKS  
EWMNHINKCVSDLLSKSGKTPSNEHAAVWVPDSEATVCMRCQKAKFTPVNRRHHCRKCGF  
VVCGPCSEKRFLPSQSSKPVRICDFCYDLLSTGEMTACQSTRSDSYSQSPKSSLNDASD  
DDDDDEDSSD

>*Sphenodon\_punctatus*(Tuatara)

MVDRLANSEANTRRISIVENCFGAAGQPLTIPGRVLIGEGVLTCLCRKKPKARQFFLFND  
ILVYGNIVIQKKKYNKQHIIPLENVTIESIQDEGDLRNGWLIKTPTKSFAVYAATATEKS  
EWMNHINKCVSDLLSKSGKTPSNEHAADVWVPDSEASVCMRCQKAKFTPVNRRHHCRKCGF  
VVCGPCSEKRFLFPSQASKPVRICDFCYDLLSSGEMTTCLPTRSDSYSQSPKSPLNNVSD  
DDDDDDSSD

>*Equus\_asinus*(Donkey)

MVDRLANSEANTRRINIVEHCFGAAGQPLTIPGRVLIGEGVLTCLCRKKPKARQFFLFND  
ILVYGNIVIQKKKYNKQHIIPLENVTIDSIKDEGDLRNGWLIKTPTKSFAVYAATATEKS  
EWMNHINKCVTDLLSKSGKTPSNEHAADVWVPDSEATVCMRCQKAKFTPVNRRHHCRKCGF  
VVCGPCSEKRFLFPSQSSKPVRICDFCYDLLSTGDMATCQPPRSDTYSQSLKSPLNDVSD  
DDDDDDSSD

>*Notechis\_scutatus*(Tiger\_snakes)

MVDRLANSEANTRRISVVENCFGAAGQPLTIPGRVLIGEGVLTCLCRKKPKARQFFLFND  
ILVYGNIVIQKKKYNKQHIIPLENVTIESIQDEGDLRNGWLIKTPTKSFAVYAATATEKS  
EWMNHINKCVSDLLSKSGKTPSNEHAADVWVPDSEATVCMRCQKAKFTPVNRRHHCRKCGF  
VVCGPCSEKRFLIPSQSSKPVRICDFCYEFLSMGEMSTCQPTRSDSFSQSPKPPLNDISD  
DDDDDDSSD

>*Phascolarctos\_cinereus*(koala)

MVDRLANSEANTRRISIVENCFGAAGQPLTIPGRVLIGEGVLTCLCRKKPKARQFFLFND  
ILVYGNIVIQKKKYNKQHIIPLENVTIDSIKDEGDLRNGWLIKTPTKSFAVYAATATEKS  
EWMNHINKCVTDLLSKSGKTPSNEHAADVWVPDSEATVCMRCQKAKFTPVNRRHHCRKCGF  
VVCGPCSEKRFLFPSQSSKPVRICDFCFDLLSSGDLATCQPTRSDSYSQSPKSPLNNVSD  
DEDDDEDSSD

>*Bos\_mutus*(Wild\_yak)

MVDRLANSEANTRRINIVENCFGAAGQPLTIPGRVLIGEGVLTCLCRKKPKARQFFLFND  
ILVYGNIVIQKKKYNKQHIIPLENVTIDSIKDEGDLRNGWLIKTPTKSFAVYAATATEKS  
EWMNHINKCVTDLLSKSGKTPSNEHAADVWVPDSEATVCMRCQKAKFTPVNRRHHCRKCGF  
VVCGPCSEKRFLFPSQSSKPVRICDFCYDLLSTGDMATCQPARSDSYSQSLKPPLNDVSD  
DDDDDDSSD

>*Anser\_brachyrhynchus*(Pink-footed\_goose)

MVDRLANSEANTRRISIVENCFGAAGQPLTIPGRVLIGEGVLTCLCRKKPKARQFFLFND  
ILVYGNIVIQKKKYNKQHIIPLENVTIDSIQDEGDLRNGWLIKTPTKSFAVYAATATEKS  
EWMNHINKCVSDLLSKSGKTPSNEHAADVWVPDSEATVCMRCQKAKFTPVNRRHHCRKCGF  
VVCGPCSEKRFLFPSQSSKPVRICDFCYDLLSTGEMTACQSTRSDSYSQSPKSSLNDASD  
DDDDDEDSSD

>*Mus\_spicilegus*(Steppe\_mouse)

MVDRLANSEANTRRISIVENCFGAAGQPLTIPGRVLIGEGVLTCLCRKKPKARQFFLFND  
ILVYGNIVIQKKKYNKQHIIPLENVTIDSIKDEGELRNGWLIKTPTKSFAVYAATATEKS  
EWMNHINKCVTDLLSKSGKTPSNEHAADVWVPDSEATVCMRCQKAKFTPVNRRHHCRKCGF  
VVCGPCSEKRFLFPSQSSKPVRICDFCYDLLSTGDMAACQPARSDSYSQSLKSPLNDASD  
DDDDDDSSD

>*Neovison\_vison*(American\_mink)

MVDRLANSEANTRRINIVENCFGAAGQPLTIPGRVLIGEGVLTCLCRKKPKARQFFLFND  
ILVYGNIVIQKKKYNKQHIIPLENVTIDSIKDEGDLRNGWLIKTPTKSFAVYAATATEKS  
EWMNHINKCVTDLLSKSGKTPSNEHAADVWVPDSEATVCMRCQKAKFTPVNRRHHCRKCGF  
VVCGPCSEKRFLFPSQSSKPVRICDFCYDLLSTGDMATCQPTRSDSYSQSLKSPLNDVSD  
DDDDDDSSD

>*Chelonoidis\_abingdonii*(Abingdon\_island\_giant\_tortoise)

MVDRLANSEANTRRISIVENCFGAAGQPLTIPGRVLIGEGVLTCLCRKKPKARQFFLFND  
ILVYGNIVIQKKKYNKQHIIPLENVTIDSIQDEGDLRNGWLIKTPTKSFAVYAATATEKS  
EWMNHINKCVSDLLSKSGKTPSNEHAADVWVPDSEATVCMRCQKAKFTPVNRRHHCRKCGF  
VVCGPCSEKRFLFPSQSSKPVRICDFCYDLLSTGEMTTCQPTRSDSYSQSPKSPLNDVSD  
DDDDDDSSD

>*Peromyscus\_maniculatus*(Northern\_American\_deer\_mouse)

MVDRLANSEANTRRISIVENCFGAAGQPLTIPGRVLIGEGVLTCLCRKKPKARQFFLFND  
ILVYGNIVIQKKKYNKQHIIPLENVTIDSIKDEGELRNGWLIKTPTKSFAVYAATATEKS  
EWMNHINKCVTDLLSKSGKTPSSEHAADVWVPDSEATVCMRCQKAKFTPVNRRHHCRKCGF  
VVCGPCSEKRFLFPSQSSKPVRICDFCYDLLSTGDMAACQPTRSDSYSQSLKSPLNDVSD  
DDDDDDSSD

>*Parus\_major*(Great\_tit)

MVDRLANSEANTRRISIVENCFGAAGQPLTIPGRVLIGEGVLTKLCRKKPKARQFFLFND  
ILVYGNIVIQKKKYNKQHIIPLNVTIDSIQDEGDLRNGWLIKTPTKSFAVYAATATEKS  
EWMNHINKCVSDLLSKSGKTPSNEHAAVWVPDSEATVCMRCQKAKFTPVNRRHHCRKCGF  
VVCGPCSEKRFLFPSQSSKPVRICDFCYDLLSTGEMTACQSSRSDSYSQSPKSSLNDVSD  
DDDDDEDSSD

>*Crocodylus\_porosus*(Australian\_saltwater\_crocodile)

MVDRLANSEANTRRISIVENCFGAAGQPLTIPGRVLIGEGVLTKLCRKKPKARQFFLFND  
ILVYGNIVIQKKKYNKQHIIPLNVTIDSIQDEGDLRNGWLIKTPTKSFAVYAATATEKS  
EWMNHINKCVSDLLSKSGKTPSNEHAAVWVPDSEATVCMRCQKAKFTPVNRRHHCRKCGF  
VVCGPCSEKRFLFPSQSSKPVRICDFCYDLLSSGEMTTCQPTRSDSYSQSPKSSLNDISD  
DDDDDDDDSSD

>*Coturnix\_japonica*(Japanese\_quail)

MVDRLANSEANTRRISIVENCFGAAGQPLTIPGRVLIGEGVLTKLCRKKPKARQFFLFND  
ILVYGNIVIQKKKYNKQHIIPLNVTIDSIQDEGDLRNGWLIKTPTKSFAVYAATATEKS  
EWMNHINKCVSDLLSKSGKTPSNEHAAVWVPDSEATVCMRCQKAKFTPVNRRHHCRKCGF  
VVCGPCSEKRFLFPSQSSKPVRICDFCYELLSTGEMTACQSTRSDSYSQSPKCSLNDASD  
DDDDDEDSSD

>*Bos\_taurus*(Cattle)

MVDRLANSEANTRRINIVENCFGAAGQPLTIPGRVLIGEGVLTKLCRKKPKARQFFLFND  
ILVYGNIVIQKKKYNKQHIIPLNVTIDSIKDEGDLRNGWLIKTPTKSFAVYAATATEKS  
EWMNHINKCVTDLLSKSGKTPSNEHAAVWVPDSEATVCMRCQKAKFTPVNRRHHCRKCGF  
VVCGPCSEKRFLFPSQSSKPVRICDFCYDLLSTGDMATCQPARSDSYSQSLKPPLNDVSD  
DDDDDDDDSSD

>*Electrophorus\_electricus*(Electric\_eel)

MVDRLANSEANSKRIAVVESCFGTAGQPLAIPGRVLIGEGVLTKLCRKKPKARQFFLFND  
ILVYGNIVIQKKKYNKQHIIPLESVTIDTVADEGDLRNGWLIKTPTKSFAVYAATATEKS  
EWMNHINKCVSDLLEKSGKAPSGEHAAVWVPDSEASVCMRCQKVKFTPVSRRHHCRKCGF  
VVCGPCSEKKFLLFPSQSSKPVRVCEFCYEQLSTGATLPPRSNSYSRQPCSTNVSDDDDED  
DSSD



>*Callorhinchus\_milii*(Elephant\_shark)

MVDRLANSEANARRIGMVESCFGAAGQPLTVTGRVLIGEGVLTKLCRKKAKARQFFLFND  
ILVYGNIVIQKKKYNKQHIIPLENVTIDTIEDDGELRNGWLIKTPTKSFAVYAATATEKS  
EWMNHITKCVADLLSKSGKIPSNEHAAVWVPDSEATICMRCQKVKFTPVSRRHHCRKCGF  
VVCGPCSEKRFLFPSQSSKPVRVCSFCYDLLSSGQLNATLSNRSEFYHGALQSPGNLSDE  
DEDDSSSD

>*Caenorhabditis\_elegans*(Roundworm)

MVDRLVNSEVNSRRMANVEQCFGKMGEQLSVFGRVLVGEGVLVKMCRKKPKQRQFFLFND  
ILVYGNIVISKKRYNKQRILRLEGVQVEDLEDDGIEKHGWIIKTPAKSFAVYAATETEKR  
EWMLHIERCVTDLLERGNKQAATAHAAVWVPDGEAVKCMVCGKTQFNLVQRRHHCRNCGR  
VVCGACSSRTFRIDNVHKKPVRVCDHCFDSLSSATPGQEESEPKTGNRLHHEDSSSDSED  
EVNGSGRSSNESRPTFYREDVQQPAT

>*Bos\_taurus*(Hybrid\_cattle)

MVDRLANSEANTRRINIVENCFGAAGQPLTIPGRVLIGEGVLTKLCRKKPKARQFFLFND  
ILVYGNIVIQKKKYNKQHIIPLENVTIDSIKDEGDLRNGWLIKTPTKSFAVYAATATEKS  
EWMNHINKCVTDLLSKSGKTPSNEHAAVWVPDSEATVCMRCQKAKFTPVNRRHHCRKCGF  
VVCGPCSEKRFLFPSQSSKPVRICDFCYDLLSTGDMATCQPARSDSYSQSLKPPLNDVSD  
DDDDDDSSD

>*Aquila\_chrysaetos*(Golden\_eagle)

MVDRLANSEANTRRISIVENCFGAAGQPLTIPGRVLIGEGVLTKLCRKKPKARQFFLFND  
ILVYGNIVIQKKKYNKQHIIPLENVTIDSIQDEGDLRNGWLIKTPTKSFAVYAATATEKS  
EWMNHINKCVSDLLSKSGKTPSNEHAAVWVPDSEATVCMRCQKAKFTPVNRRHHCRKCGF  
VVCGPCSEKRFLFPSQSSKPVRICDFCYDLLSTGEMSACQSTRSDSYSQSPKSSLNDVSD  
DDDDDEDSSD

>*Taeniopygia\_guttata*(Zebra\_finch)

MVDRLANSEANTRRISIVENCFGAAGQPLTIPGRVLIGEGVLTKLCRKKPKARQFFLFND  
ILVYGNIVIQKKKYNKQHIIPLENVTIDSIQDEGDLRNGWLIKTPTKSFAVYAATATEKS  
EWMNHINKCVSDLLSKSGKTPSNEHAAVWVPDSEAAVCMRCQKAKFTPVNRRHHCRKCGF  
VVCGPCSEKRFLFPSQSSKPVRICDFCYDLLSSGEMTACQSTRSDSYSQSPKSSLNDVSD  
DDDDDEDSSD

>*Strigops\_habroptilus*(Kakapo)

MVDRLANSEANTRRISIVENCFGAAGQPLTIPGRVLIGEGVLTKLCRKKPKARQFFLFND  
ILVYGNIVIQKKKYNKQHIIPLENVTIDSIQDEGDLRNGWLIKTPTKSFAVYAATATEKS  
EWMNHINKCVSDLLSKSGKTPSNEHAAVWVPDSEATVCMRCQKAKFTPVNRHHCRKCGF  
VVCGPCSEKRFLFPSQSSKPVRICDFCYDLLSTGEMTACQSTRSDSYSQSPKSSLNDVSD  
DDDDDEDSSD

>*Jaculus\_orientalis*(Egyptian\_jerboa)

VENCFGAAGQPLTIPGRVLIGEGALTKLCRSLRQGSFSYLMTVLNTKKKYNKQHIIPLENV  
TIGSIKDEGELRNGWLTKTPTKSFAKSERMNPISKSAADFLSQSGKTASDDEICTCS  
SSSPGQKCGFVVRGPCSEKRFLFPSQSSKPVRICDFCDDPLSTGAMATCQPTRSHSLSLK  
SPL

>*Prolemur\_simus*(Greater\_bamboo\_lemur)

MVDRLANSEANTRRISIVENCFGAAGQPLTIPGRVLIGEGVLTKLCRKKPKARQFFLFND  
ILVYGNIVIQKKKYNKQHIIPLENVTIDSIKDEGDLRNGWLIKTPTKSFAVYAATATEKS  
EWMNHINKCVTDLLSKSGKTPSNEHAAVWVPDSEATVCMRCQKAKFTPVNRHHCRKCGF  
VVCGPCSEKRFLFPSQSSKPVRICDFCYDLLSTGDMATCQPTRSDSYSQSLKSPLNDVSD  
DDDDDDDDSSD

>*Serinus\_canaria*(Common\_canary)

MVDRLANSEANTRRISIVENCFGAAGQPLTIPGRVLIGEGVLTKLCRKKPKARQFFLFND  
ILVYGNIVIQKKKYNKQHIIPLENVTIDSIQDEGDLRNGWLIKTPTKSFAVYAATATEKS  
EWMNHINKCVSDLLSKSGKTPSNEHAAVWVPDSEATVCMRCQKAKFTPVNRHHCRKCGF  
VVCGPCSEKRFLFPSQSSKPVRICDFCYDLLSTGEMTACQSTRSDSYSQSPKSSLNDVSD  
DDDDDEDSSD

>*Gorilla\_gorilla*(Western\_lowland\_gorilla)

MVDRLANSEANTRRISIVENCFGAAGQPLTIPGRVLIGEGVLTKLCRKKPKARQFFLFND  
ILVYGNIVIQKKKYNKQHIIPLENVTIDSIKDEGDLRNGWLIKTPTKSFAVYAATATEKS  
EWMNHINKCVTDLLSKSGKTPSNEHAAVWVPDSEATVCMRCQKAKFTPVNRHHCRKCGF  
VVCGPCSEKRFLFPSQSSKPVRICDFCYDLLSAGDMATCQPARSDSYSQSLKSPLNDMSD  
DDDDDDSSD

>*Hippocampus\_comes*(Tiger\_tail\_seahorse)

MVDRLANSEANSKRISVVEGCFGAAGQPLAIPGRVLIGEVLTCLCRKKPKARQFFLFND  
ILVYGNIVLQKKKYNKQHIIPLESVTIDTVPDEGELRNGWLIKTPTKSFAVYAATATEKS  
EWMNHIGKCVQELLQKSGKAPAGEHAAVWVPDSEAAVCMRCQKVKFTPVSRRHHCRKCGF  
VVCGPCSEKKYLLPSQSSKPVRVCQFCYQQLVAGGRSDTVCGRAGDFRDVSDDDDDDDDSD  
SD

>*Propithecus\_coquereli*(Coquerel's\_sifaka)

MVDRLANSEANTRRISIVENCFGAAGQPLTIPGRVLIGEVLTCLCRKKPKARQFFLFND  
ILVYGNIVIQKKKYNKQHIIPLENTIDSIDEGDLRNGWLIKTPTKSFAVYAATATEKS  
EWMNHINKCVTDLLSKSGKTPSNEHAAVWVPDSEATVCMRCQKAKFTPVNRRHHCRKCGF  
VVCGPCSEKRFLPSQSSKPVRICDFCYDLLSTGDMATCQPTRSDSYSQSLKSPLNDVSD  
DDDDDDSSD

>*Poecilia\_latipinna*(Sailfin\_molly)

MVDRLANSEANSKRIGLVESCFGAAGQPLAIPGRVLIGEVLTCLCRKKPKARQFFLFND  
ILVYGNIVIQKKKYNKQHIIPLEGVTIDTVPDEGELRNGWLIKTPTKSFAVYAATATEKS  
EWMNHIGKCVRELLQKSGKSPTGEHAAVWVPDSEATVCMRCKKVKFTPVSRRHHCRKCGY  
VVCGPCSEKKFLLPSQSSKPVRVCEHCYGMLSGSLGRSEMSRPGANFNNTLSDDDDDD  
DDSSD

>*Astyanax\_mexicanus*(Mexican\_tetra)

MVDRLANSEANSKRIAVVEGCFGTAGQPLAIPGRVLIGEVLTCLCRKKPKARQFFLFND  
ILVYGNIVIQKKKYNKQHIIPLESVTIDTVADEGDLRNGWLIKTPTKSFAVYAATATEKS  
EWMNHISKCVSDLLEKSGKSPTGEHAAVWVPDSEASVCMRCQKVKFTPVSRRHHCRKCGF  
VVCGPCSEKKFLLPSQSSKPVRVCEFCYQLSTEASLPVRSNSYSRTPTSKFLTNNVSDD  
DDEDDSSD

>*Aotus\_nancymae\_1*\_(Ma's\_night\_monkey)

MVDRLANSEANTRRISIVENCFGAAGQPLTIPGRVLIGEVLTCLCRKKPKARQFFLFND  
ILVYGNIVIQKKKYNKQHIIPLENTIDSIDEGDLRNGWLIKTPTKSFAVYAATATEKS  
EWMNHINKCVTDLLSKSGKTPSNEHAAVWVPDSEATVCMRCQKAKFTPVNRRHHCRKCGF  
VVCGPCSEKRFLPSQSSKPVRICDFCYDLLSTGDMATCQPTRSDSYSQSLKSPLNDMSD  
DDDDDDSSD

>*Poecilia\_reticulata*(Guppy)

MVDRLANSEANSKRIGLVESCFGAAGQPLAIPGRVLIGEGVLTCLCRKKPKARQFFLFND  
IMVYGNIVIQKKKYNKQHIIPLEGVTIDTVPDEGELRNGWLIKTPTKSFAVYAATATEKS  
EWMNHIGKCVRELLQKSGKSPTGEHAAVWVPDSEATVCMRCKKVKFTPVSRRHHCRKCGY  
VVCGPCSEKKFLLPSQSSKPVRVCEHCYGMLSGSLGPRSEMSRPGANFNNTLSDDDDD  
DDSSD

>*Pygocentrus\_nattereri*(Red-bellied\_piranha)

MVDRLANSEANSKRIAVVESCFGTAGQPLAIPGRVLIGEGVLTCLCRKKPKARQFFLFND  
ILVYGNIVIQKKKYNKQHIIPLESVTIDTVADEGDLRNGWLIKTPTKSFAVYAATATEKS  
EWMNHISKCVSDLLEKSGKSPTGEHAAVWVPDSEASVCMRCQKVKFTPVSRRHHCRKCGF  
VVCGPCSEKKFLLPSQSSKPVRVCEFCYDQLSTGATLPVRSNSYSLLPPSCKFGSNVSDD  
EDEDSSD

>*Anas\_platyrhynchos*(Common\_mallard)

MVDRLANSEANTRRISIVENCFGAAGQPLTIPGRVLIGEGVLTCLCRKKPKARQFFLFND  
ILVYGNIVIQKKKYNKQHIIPLENTIDSIQDEGDLRNGWLIKTPTKSFAVYAATATEKS  
EWMNHINKCVSDLLSKSGKTPSNEHAAVWVPDSEATVCMRCQKAKFTPVNRRHHCRKCGF  
VVCGPCSEKRFLPSQSSKPVRICDFCYDLLSTGEMTACQSARPSGSSNRGIWRVEM

>*Labris\_bergylta*(Ballan\_wrasse)

MISRPWLYFRTVQQVRERVSALRCHIVSVSPQLQQLVGVCLSSSCSVSCLRTLRLRRA  
APASTDSIWNTTELQVAAKVSRGREEPSGEVKMVDRLANSEANSKRIAVVEGCFGAAGQP  
LAIPGRVLIGEGVLTCLCRKKPKARQFFLFNDILVYGNIVIQKKKYNKQHIIPLESVTID  
TVPDEGDLHNGWLIKTPTKSFAVYAATATEKSEWMNHIGKCVGDLLQKSGKSPTGEHAAV  
WVPDSEATVCMRCQKVKFTPVSRRHHCRKCGYVVCGPCSDKKYLLPSQSSKPVRVCEFCF  
VQLTSGGLSIRSDSISRPGSKFNSSNMSDDDDDEDSSD

>*Aotus\_nancymae\_2\_*(Ma's\_night\_monkey)

MVDRLANSEANTRRISIVENCFGAAGQPLTIPGRVPIGEGVLTCLCRKKPKARQFFLFND  
ILVYGNIVIQKKKYNKQHIIPLENTIDSIKDEGDLRNGWLIKTPTKSFAVYAATATEKS  
EWMNHINKCVTDLLSKSGKTPSNEHAAVWDPDSEATVCMRCQKAKFTPVNRRHHCRKCGF  
VVCGPCSEKRFLPSQSSKPVRICDFCYDLLSTGNMATCQPTRSDSYSQSLKSPLNDMSD  
DDDDDDSSD

>*Spalax\_galili*(Upper\_Galilee\_Mountains\_blind\_mole-rat)

MVDRLANSEANTRRISIVENCFGAAGQPLTIPGRVLIGEGVLTCLCRKKPKARQFFLFND  
ILVYGNIVIQKKKYNKQHIIPLNVTIDSIKDEGELRNGWLIKTPTKSFAVYAATATEKS  
EWMNHINKCVTDLLSKSGKTPSNEHAAVWVPDSEATVCMRCQKAKFTPVNRRHHCRKCGF  
VVCGPCSEKRFLFPSQSSKPVRICDFCYELLSAGDMATCQPARSDSYSQSLKSPLNDVSD  
DDDDDDSSD

>*Chrysemys\_picta*(Western\_painted\_turtle)

MVDRLANSEANTRRISIVENCFGAAGQPLTIPGRVLIGEGVLTCLCRKKPKARQFFLFND  
ILVYGNIVIQKKKYNKQHIIPLNVTIDSIQDEGDLRNGWLIKTPTKSFAVYAATATEKS  
EWMNHINKCVSDLLSKSGKTPSNEHAAVWVPDSEATVCMRCQKAKFTPVNRRHHCRKCGF  
VVCGPCSEKRFLFPSQSSKPVRICDFCYDLLSTGEMTTCQPTRSDSYSQSPKSPLNDVSD  
DDDDDDSSD

>*Astatotilapia\_burtoni*(Burton's\_mouthbrooder)

MVDRLANSEANSKRIAVVESCFGAAGQPLAIPGRVLIGEGVLTCLCRKKPKARQFFLFND  
ILVYGNIVIQKKKYNKQHIIPLESVTIDTVPDEGDLRNGWLIKTPTKSFAVYAATATEKS  
EWMNHIGKCVGDLLQKSGKSPTGEHAAVWVPDSEASVCMRCKKVKFTPVSRRHHCRKCGF  
VVCGPCSEKKYLLFPSQSSKPVRVCEHCYEQLTSSLLPPQDCLYSVILLQSEP

>*Pan\_troglodytes*(Chimpanzee)

MVDRLANSEANTRRISIVENCFGAAGQPLTIPGRVLIGEGVLTCLCRKKPKARQFFLFND  
ILVYGNIVIQKKKYNKQHIIPLNVTIDSIKDEGDLRNGWLIKTPTKSFAVYAATATEKS  
EWMNHINKCVTDLLSKSGKTPSNEHAAVWVPDSEATVCMRCQKAKFTPVNRRHHCRKCGF  
VVCGPCSEKRFLFPSQSSKPVRICDFCYDLLSAGDMATCQPARSDSYSQSLKSPLNDMSD  
DDDDDDSSD

>*Bison\_bison*(American\_bison)

MVDRLANSEANTRRINIVENCFGAAGQPLTIPGRVLIGEGVLTCLCRKKPKARQFFLFND  
ILVYGNIVIQKKKYNKQHIIPLNVTIDSIKDEGDLRNGWLIKTPTKSFAVYAATATEKS  
EWMNHINKCVTDLLSKSGKTPSNEHAAVWVPDSEATVCMRCQKAKFTPVNRRHHCRKCGF  
VVCGPCSEKRFLFPSQSSKPVRICDFCYDLLSTGDMATCQPARSDSYSQSLKPPLNDVSD  
DDDDDDSSD

>*Saimiri\_sciureus*(Squirrel\_monkeys)

MVDRLANSEANTRRISIVENCFGAAGQPLTIPGRVLIGEGVLTCLCRKKPKARQFFLFND

ILVYGNIVIQKKKYNKQHIIPLENVTIDSIKDEGDLRNGWLIKTPTKSFAVYAATATEKS  
EWMNHINKCVTDLLSKSGKTPSNDHAAVWVPDSEATVCMRCQKAKFTPVNRRHHCRKCGF  
VVCGPCSEKRFLFPSQSSKPVRICDFCYDLLSTGEMATCQPARSDSYSQSLKSPLNDMSD  
DDDDDDSSD

>*Ictalurus\_punctatus*(Channel\_catfish)

MVDRLANSEANSKRIAVVEGCFGTAGQPLAIPGRVLIGEGVLTCLCRKKPKARQFFLFND  
ILVYGNIVIQKKKYNKQHIIPLESVTIDTVADEGELRNGWLIKTPTKSFAVYAATATEKS  
EWMNHINKCVSDLLEKSGKSPTGEHAAVWVPDSEASVCMRCQKVKFTPVSRRHHCRKCGF  
VVCGPCSEKKFLFPSQSSKPVRVCEFCYQLSTGATLPPRSNSYSRTNNISEDEDEDSS  
D

>*Papio\_anubis*(Olive\_baboon)

MVDRLANSEANTRRISIVENCFGAAGQPLTIPGRVLIGEGVLTCLCRKKPKARQFFLFND  
ILVYGNIVIQKKKYNKQHIIPLENVTIDSIKDEGDLRNGWLIKTPTKSFAVYAATATEKS  
EWMNHINKCVTDLLSKSGKTPSNEHAAVWVPDSEATVCMRCQKAKFTPVNRRHHCRKCGF  
VVCGPCSEKRFLFPSQSSKPVRICDFCYDLLSAGDMATCQPARSDSYSQSLKSSLNDMSD  
DDDDDDSSD

>*Seriola\_lalandi*(Yellowtail\_amberjack)

MVDRLANSEANSKRIAVVEGCFGAAGQPLAIPGRVLIGEGVLTCLCRKKPKARQFFLFND  
ILVYGNIVIQKKKYNKQHIIPLESVTIDTVPDEGDLRNGWLIKTPTKSFAVYAATATEKS  
EWMNHIGKCVGDLLQKSGKAPTGEHAAVWVPDSEAAVCMRCQKVKFTPVSRRHHCRKCGF  
VVCGPCSEKKYLLFPSQSSKPVRVCEYCYVQLTSGSLAPRSDSISRPGSKFNNLSDDDED  
DSSD

>*Mesocricetus\_auratus*(Golden\_hamster)

MVDRLANSEANTRRISIVENCFGAAGQPLTIPGRVLIGEGVLTCLCRKKPKARQFFLFND  
ILVYGNIVIQKKKYNKQHIIPLENVTIDSIKDEGELRNGWLIKTPTKSFAVYAATATEKS  
EWMNHINKCVTDLLSKSGKTPSSEHAAVWVPDSEATVCMRCQKAKFTPVNRRHHCRKCGF  
VVCGPCSEKRFLFPSQSSKPVRICDFCYDLLSTGDMAACQPARSDSYSQSLKSPLNDVSD  
DDDDDDSSD

>*Ursus\_maritimus*(Polar\_bear)

MVDRLANSEANTRRINIVENCFGAAGQPLTIPGRVLIGEGVLTCLCRKKPKARQFFLFND

ILVYGNIVIQKKKYNKQHIIPLENVTIDSIKDEGDLRNGWLIKTPTKSFAVYAATATEKS  
EWMNHINKCVTDLLSKSGKTPSNEHAAVWVPDSEATVCMRCQKAKFTPVNRRHHCRKCGF  
VVCGPCSEKRFLFPSQSSKPVRICDFCYDLLSTGDMSCAQPTRSDSYSQSLKSPLNDVSD  
DDDDDDSSD

>*Seriola\_dumerili*(Greater\_amberjack)

MVDRLANSEANSKRIAVVEGCFGAAGQPLAIPGRVLIGEGVLTKLCRKKPKARQFFLFND  
ILVYGNIVIQKKKYNKQHIIPLESVTIDTVPDEGDLRNGWLIKTPTKSFAVYAATATEKS  
EWMNHIGKCVGDLLQKSGKAPTGEHAAVWVPDSEAAVCMRCQKVKFTPVSRRHHCRKCGF  
VVCGPCSEKKYLLPSQSSKPVRVCEYCYVQLTSGSLAPRSDSISRPGSKFNNLSDDDED  
DSSD

>*Marmota\_marmota*(Alpine\_marmot)

MVDRLANSEANTRRISIVENCFGAAGQPLTIPGRVLIGEGVLTKLCRKKPKARQFFLFND  
ILVYGNIVIQKKKYNKQHIIPLENVTIDSIKDEGDLRNGWLIKTPTKSFAVYAATATEKS  
EWMNHINKCVTDLLSKSGKTPSNEHAAVWVPDSEATVCMRCQKAKFTPVNRRHHCRKCGF  
VVCGPCSEKRFLFPSQSSKPVRICDFCYDLLSTGDMATCQPTRSDSYSQSLKSPLNDVSD  
DDDDDDSSD

>*Rhinopithecus\_roxellana*(Golden\_snub-nosed\_monkey)

MVDRLANSEANTRRISIVENCFGAAGQPLTIPGRVLIGEGVLTKLCRKKPKARQFFLFND  
ILVYGNIVIQKKKYNKQHIIPLENVTIDSIKDEGDLRNGWLIKTPTKSFAVYAATATEKS  
EWMNHINKCVTDLLSKSGKTPSNEHAAVWVPDSEATVCMRCQKAKFTPVNRRHHCRKCGF  
VVCGPCSEKRFLFPSQSSKPVRICDFCYDLLSTGDMATCQPARSDSYSQSLKSPLNDMSD  
DDDDDDSSD

>*Paramormyrops\_batesii*(Paramormyrops)

MVDRLANSEANSKRIAVVEGCFGAAGQPLAIPGRVLIGEGVLTKLCRKKPKARQFFLFND  
ILVYGNIVIQKKKYNKQHIIPLESVTIDTVEDEGDLRNGWLIKTPTKSFAVYAATATEKS  
EWMNHINKCVSDLLEKSGKLPSEHAAVWVPDSEASVCMRCQKIKFTPVSRRHHCRKCGF  
VVCQCSEKKFLLPSQSSKPVRVCEFCYDQLSVGQPGVPGGLSARSDSYSLSSNKFCGNN  
MSDDEDEDSSD

>*Rhinopithecus\_bieti*(Black\_snub-nosed\_monkey)

MVDRLANSEANTRRISIVENCFGAAGQPLTIPGRVLIGEGVLTKLCRKKPKARQFFLFND

ILVYGNIVIQKKKYNKQHIIPLNVTIDSIKDEGDLRNGWLIKTPTKSFAVYAATATEKS  
EWMNHINKCVTDLLSKSGKTPSNEHAAVWVPDSEATVCMRCQKAKFTPVNRRHHCRKCGF  
VVCGPCSEKRFLFPSQSSKPVRICDFCYDLLSTGDMATCQPARSDSYSQSLKSPLNDMSD  
DDDDDDSSD

>*Microcebus\_murinus*(Gray\_mouse\_lemur)

MVDRLANSEANTRRISIVENCFGAAGQPLTIPGRVLIGEGVLTCLCRKKPKARQFFLFND  
ILVYGNIVIQKKKYNKQHIIPLNVTIDSIKDEGDLRNGWLIKTPTKSFAVYAATATEKS  
EWMNHINKCVTDLLSKSGKTPSNEHAAVWVPDSEATVCMRCQKAKFTPVNRRHHCRKCGF  
VVCGPCSEKRFLFPSQSSKPVRICDFCYDLLSTGDMATCQPTRSDSYSQSLKSPLNDVSD  
DDDDDDSSD

>*Panthera\_pardus*(Leopard)

MVDRLANSEANTRRINIVENCFGAAGQPLTIPGRVLIGEGVLTCLCRKKPKARQFFLFND  
ILVYGNIVIQKKKYNKQHIIPLNVTIDSIKDEGDLRNGWLIKTPTKSFAVYAATATEKS  
EWMNHINKCVTDLLSKSGKTPSNEHAAVWVPDSEATVCMRCQKAKFTPVNRRHHCRKCGF  
VVCGPCSEKRFLFPSQSSKPVRICDFCYDLLSTGDMATCQPTRSDSYSQSLKSPLNDVSD  
DDDDDDSSD

>*Hucho\_hucho\_1\_*(Huchen)

MVDRLANSEANSKRIQVVEGCFGTAGQPLVIPGRVLIGEGVLTCLCRKKPKARQFFLFND  
ILVYGNIVIQKKKYNKQHIIPLESVTIDTVADEGDLRNGWLIKTPTKSFAVYAATATEKS  
EWMNHIGKCVGDLLEKSGKAPTGEHAAVWIPDSEATLCMRCQKIKFTPLSRRHHCRKCGY  
VVCGPCSDKKFLLFPSQSSKPVRVCEFCYLQLASTGGGMGLGPRSDSYSRSVSKFNNVSD  
EDEEDSSD

>*Geospiza\_fortis*(Medium\_ground\_finch)

MVDRLANSEANTRRISIVENCFGAAGQPLTIPGRVLIGEGVLTCLCRKKPKARQFFLFND  
ILVYGNIVIQKKKYNKQHIIPLNVTIDSIQDEGDLRNGWLIKTPTKSFAVYAATATEKS  
EWMNHINKCVSDLLSKSGKTPSNEHAAVWVPDSEATVCMRCQKAKFTPVNRRHHCRKCGF  
VVCGPCSEKRFLFPSQSSKPVRICDFCYDLLSTGEMTACQSTRSDSYSQSPKSSLNDVSD  
DDDEDEDSSD

>*Hucho\_hucho\_2\_*(Huchen)

MSEAKMVDRLANSEANSKRIQVVEGCFGAAGQPLVIPGRVLIGEGVLTCLCRKKPKARQF



FLFNDILVYGSIVIQKKKYNKQHIIPLESITIDTVADEGDLRNGWLIKTPTKSFAVYAAT  
ATEKSEWMSHIGKCVGDLLEKSGKAPTGEHAAVWIPDSEATLCMRCQKIKFTPLSRRHHC  
RKCGYVVCGPCSDKKFLLPSQSSKPVRVCEFCYLQLASAGGGTGLGPRSDSYSRSGSKFN  
NVSDDEDEEDSSD

>*Ursus\_americanus*(American\_black\_bear)

MVDRLANSEANTRRINIVENCFGAAGQPLTIPGRVLIGEGVLTCLCRKKPKARQFFLFND  
ILVYGNIVIQKKKYNKQHIIPLENTIDSIDEGDLRNGWLIKTPTKSFAVYAATATEKS  
EWMNHINKCVTDLLSKSGKTPSNEHAAVWVPDSEATVCMRCQKAKFTPVNRRHHCRKCGF  
VVCGPCSEKRFLPSQSSKPVRICDFCYDLLSTGDMAACQPTRSDSYSQSLKSPLNDVSD  
DDDDDDSSD

>*Symphurus\_thermophilus*(Tonguefish)

MVDRLANSEANSKRIAVVEGCFGAAGQPLAIPGRVLIGEGVLTCLCRKKPKARQFFLFND  
ILVYGNIVIQKKKYNKQHIIPLESVTIDTVPDEGDLRNGWLIKTPTKSFAVYAATATEKS  
EWMNHIGKCVGDLQKSGKSPSGEHAAVWVPDSEATVCMRCQKVKFTPVSRRHHCRKCGY  
VVCGPCSEKKYLLPSQSSKPVRVCEYCYIQLTSGPRSDSIGRPGLKFGNNLTDDDDDDDD  
SSD

>*Octodon\_degus\_1\_*(Common\_degu)

MLDRLANSEANTRRIGIVENCVGAAGQPLTIPGRVLIGEGVLTCLCRKKPKARQFFLFND  
ILVYGNIVIQKKKYNKQHIIPLENTIDSIDEGDLRNGWLIKTPTKSFAVYAATATEKS  
EWMNHINKCVTDLLSKSGKTPVNEHAAVWVPDSEATVCMRCQKVKFTPVTRRRHHCRKCGF  
VVCGPCSEKGFLLPSQSSKPVRICDFCYDLISTGDMAACQPAWSDSYSQSVKSPLNDVSD  
DDEEDSSD

>*Dipodomys\_ordii*(Ord's\_kangaroo\_rat)

MVDRLANSEANTRRISIVENCFGAAGQPLTIPGRVLIGEGVLTCLCRKKPKARQFFLFND  
ILVYGNIVIQKKKYNKQHIIPLENTIDSIDEGELRNGWLIKTPTKSFAVYAATATEKS  
EWMNHINKCVTDLLSKSGKTPNNEHAAVWVPDSEATVCMRCQKAKFTPVNRRHHCRKCGF  
VVCGPCSEKRFLPSQSSKPVRICDFCYDLLSTGDLATCQPTRSDSYSQSLKSPLNDGSD  
DDDDDDSSD

>*Mandrillus\_leucophaeus*(Drill)

MVDRLANSEANTRRISIVENCFGAAGQPLTIPGRVLIGEGVLTCLCRKKPKARQFFLFND

ILVYGNIVIQKKKYNKQHIIPLENTIDSIKDEGDLRNGWLIKTPTKSFAVYAATATEKS  
EWMNHINKCVTDLLSKSGKTPSNEHAAVWVPDSEATVCMRCQKAKFTPVNRHHCRKCGF  
VVCGPCSEKRFLFPSQSSKPVRICDFCYDLLSTGDMATCQPARSDSYSQSLKSPLNDMSD  
DDDDDDSSD

>Octodon\_degus\_2\_(Common\_degu)

MVDQLANSEANTRRIGIVENCFGAAGQPFTIPGRVLIGEGVLTCLCRKKPKARQFFLFND  
ILVYGNTVIQKKKYNKQHIIPLENTIDSIKDETPTKSFAVYAAAATEKSEWMNHINKCV  
TDLLSKSGKTPVNEHAAVWVPDSEATKVKFTPVNRHHHCHKCGFVVCGPCSEKRFLFPSQ  
FSKPVQICEFCYDLLSTVDMACQPARSDSYSQSLKSPLNDVSDDDEEDNEKND

>*Kryptolebias\_marmoratus*(Mangrove\_rivulus)

MVDRLANSEANSKRIALVESCFAAGQPLAIPGRVLIGEGVLTCLCRKKPKARQFFLFND  
ILVYGNIVIQKKKYNKQHIIPLENTIDTVPDEGELRNGWLIKTPTKSFAVYAATATEKS  
EWMNHIGKCVRELLQKSGKSPTGEHAAVWVPDSEATVCMRCHKVKFTPVSRRHHCRKCGF  
VVCGPCSEKKFLFPSQSSKPVRVCGHCYSLLMSGSLGPRSDSITLGPNNFNNNTLSDDDED  
DDSSD

>*Acanthochromis\_polyacanthus*(Spiny\_chromis)

MVDRLANSEANSKRIAVVESCFAAGQPLAIPGRVLIGEGVLTCLCRKKPKARQFFLFND  
ILVYGNIVIQKKKYNKQHIIPLESVTIDTVPDEGDLRNGWLIKTPTKSFAVYAATATEKS  
EWMNHIGKCVGDLLQKSGKSPTGEHAAVWVPDSEASVCMRCQKVKFTPVSRRHHCRKCGF  
VVCGPCSEKKYLLFPSQSSKPVRVCEYCYLQLTSGSLGPRSDSISRPGSKFNNLSDDDED  
DSSD

>*Pan\_paniscus*(Bonobo)

MVDRLANSEANTRRISIVENCFAAGQPLTIPGRVLIGEGVLTCLCRKKPKARQFFLFND  
ILVYGNIVIQKKKYNKQHIIPLENTIDSIKDEGDLRNGWLIKTPTKSFAVYAATATEKS  
EWMNHINKCVTDLLSKSGKTPSNEHAAVWVPDSEATVCMRCQKAKFTPVNRHHCRKCGF  
VVCGPCSEKRFLFPSQSSKPVRICDFCYDLLSAGDMATCQPARSDSYSQSLKSPLNDMSD  
DDDDDDSSD

>*Sinocyclocheilus\_grahami\_1*\_(Golden-line\_barbel)

MVDRLANSEANSKRIGVVEVCFGTAGQPLVIPGRVLIGEGVLTCLCRKRPKARQFFLFND  
ILVYGNIIIQKKKYNKQHIIPLESVTIDTVEDEGDLRNGWLIKTPTKSFAVYAATATEKS

EWMSHISKCVSDLLEKSGKSPTGDHAAVWVPDSEATVCMRCQKTKFTPVSRRHHCRKCGF  
VVCGPCSEKKFLLPSQSSKPVRVCEFCYKQLFSGATLPSHSDSYSHPEISSNISDDDDDD  
DDSSD

>*Lates\_calcarifer*(Barramundi)

MVDRLANSEANSKRIAVVESCFGAAGQPLAIPGRVLIGEGVLTCLCRKKPKARQFFLFND  
ILVYGNIVIQKKKYNKQHIIPLESVTIDTVPDEGDLRNGWLIKTPTKSFAVYAATATEKS  
EWMNHIGKCVGDLLQKSGKAPTGEHAAVWVPDSEATVCMRCQKVKFTPVSRRHHCRKCGF  
VVCGPCSEKKYLLPSQSSKPVRVCEYCYVQLTSGSLPPRSDSMSRLGSKFNSNNLSDDDED  
EDDSSD

>*Sinocyclocheilus\_grahami\_2\_*(Golden-line\_barbel)

MVDRLANSEANSKRIGVVEACFGTAGQPLAIPGRVLIGEGVLTCLCRKRPKARQFFLFND  
ILVYGNIVIQKKKYNKQHIIPLESVTIDTVEDEGDLRNGWLIKTPTKSFAVYAATATEKS  
EWMSHISKCVSDLLEKSGKSPTGEHAAVWVPDSEATVCMRCQKMKFTPMNRRHHCRKCGF  
VVCGPCSEKKFLLPSQSSKPVRVCEFCYKQLSTGGTLPSHSDSYSRSEFSSNNISDDDDDD  
DDSSD

>*Carlito\_syrichtha*(Philippine\_tarsier)

MVDRLANSEANTRRISIVENCFGAAGQPLTIPGRVLIGEGVLTCLCRKKPKARQFFLFND  
ILVYGNIVIQKKKYNKQHIIPLENTIDSIDEGDLRNGWLIKTPTKSFAVYAATATEKS  
EWMNHINKCVTDLLSKSGKTPSNEHAAVWVPDSEATVCMRCQKAKFTPVNRRHHCRKCGF  
VVCGPCSEKRFLPSQSSKPVRICDFCYDLLSTGDMATCQPTRSDSYSQSLKSPLNDVSD  
DDDDDDSSD

>*Canis\_lupus*(Dingo)

MVDRLANSEANTRRINIVENCFGAAGQPLTIPGRVLIGEGVLTCLCRKKPKARQFFLFND  
ILVYGNIVIQKKKYNKQHIIPLENTIDSIDEGDLRNGWLIKTPTKSFAVYAATATEKS  
EWMNHINKCVTDLLSKSGKTPSNEHAAVWVPDSEATVCMRCQKAKFTPVNRRHHCRKCGF  
VVCGPCSEKRFLPSQSSKPVRICDFCYDLLSTGDMATCQPARSDSYSQSLKSPLNDVSD  
DDDDDDSSD

>*Cyclopterus\_lumpus*(Lumpfish)

MVDRLANSEANSKRIAVVEGCFGAAGQPLVIPGRVLIGEGVLTCLCRKKPKARQFFLFND  
ILVYGNIVIQKKKYNKQHIIPLEAVTIDTVPDEGDLRNGWLIKTPTKSFAVYAATATEKS

EWMNHIGKCVEDLLQKSGKAPAGEHAAVWVPDSEATVCMRCQKVKFTPVSRRHHCRKCGF  
VVCGPCSEKKHLLPSQSSKPVRVCEYCFLQLTAGGLAPRSDSLGSKFNNLSDDDDDED  
DSSD

>*Sander\_lucioperca*(Zander)

MVDRLANSEANSKRIGVVEGCFGAAGQPLAIPGRVLIGEGVLTCLCRKKPKARQFFLFND  
ILVYGNIVIQKKKYNKQHIIPLESVTIDTVPDEGDLHNGWLIKTPTKSFAVYAATATEKS  
EWMNHIGKCVGDLLQKSGKAPTGEHAAVWVPDSEATVCMRCQKVKFTPVSRRHHCRKCGY  
VVCGPCSEKKHLLPSQSSKPVRVCEYCYVQLTSGGLAQRSDSISRLGSKFNNLSDDDDDD  
DSSD

>*Nothobranchius\_furzeri*(Turquoise\_killifish)

MVDRLANSEANSKRIGLVESCFGAAGQPLAIPGRVLIGEGVLTCLCRKKPKARQFFLFND  
ILVYGNIVIQKKKYNKQHIIPLESVTIDTVPDEGELRNGWLIKTPTKSFAVYAATATEKS  
EWMNHIGKCVRELLQKSGKSPTGEHAAVWVPDSEAPLCMCCHKVKFTPVSRRHHCRKCGF  
VVCGPCSEKRFLPSQSSKPVRVCEHCYTVLMSGGLGPHDSISRPTSNFNNNTLSDDDED  
DNSSD

>*Monodon\_monoceros*(Narwhal)

MVDRLANSEANTRRINIVENCFGAAGQPLTIPGRVLIGEGVLTCLCRKKPKARQFFLFND  
ILVYGNIVIQKKKYNKQHIIPLENTIDSIDEGDLRNGWLIKTPTKSFAVYAATATEKS  
EWMNHINKCVTDLLSKSGKTPSNEHAAVWVPDSEATVCMRCQKAKFTPVNRRHHCRKCGF  
VVCGPCSEKRFLPSQSSKPVRICDFCYDLLSAGDMATCQPTRSDSYSQSLKSTLNDVSD  
DDDDDDSSD

>*Cervus\_elaphus\_1*\_(Yarkand\_deer)

MVDRLANSEANTRRINIVENCFGAAGQPLTIPGRVLIGEGVLTCLCRKKPKARQFFLFND  
ILVYGNIVIQKKKYNKQHIIPLENTIDSIDEGDLRNGWLIKTPTKSFAVYAATATEKS  
EWMNHINKCVTDLLSKSGKTPSNEHAAVWVPDSEATVCMRCQKAKFTPVNRRHHCRKCGF  
VVCGPCSEKRFLPSQSSKPVRICDFCYDLLSTGDMATCQPARSDSYSQSLKPPLNDVSD  
DDDDDDSSD

>*Cervus\_elaphus\_2*\_(Yarkand\_deer)

MPTVDPLAKSEANTRRINIVENGFGAAGGLTELCRKKPKVRQFFLLNDILVYGNIVIQKK  
KYIKQHIIPLENTIDSIDEGDLRNGWLIKTPTKSLAVYAATATEKSEWMNPINKCVTD

LLSKSGKTPSNEHAAVWVPDSEATVCMRCQKAKFTPVNRRHHCRKCGFVVCGPCSEKRFL  
LPSQSSKPVRICDFCYDLLSTGDMATCQPARSDSYSQSLKPPLNDVSDDDSSD

>*Balaenoptera\_musculus*(Blue\_whale)

MVDRLANSEANTRRINIVENCFGAAGQPLTIPGRVLIGEGVLTKLCRKKPKARQFFLFND  
ILVYGNIVIQKKKYNKQHIIPLENVTIDSIKDEGDLRNGWLIKTPTKSFAVYAATATEKS  
EWMNHINKCVTDLLSKSGKTPSNEHAAVWVPDSEATVCMRCQRAKFTPVNRRHHCRKCGF  
VVCGPCSEKRFLLPQSSKPVRICDFCYDLLSTGDMATCQPTRSDSYSQSLKSPLNDVSD  
DDDDDDSSD

>*Leptobrachium\_leishanense*(Leishan\_spiny\_toad)

MVDRLANSEANARRINLVESCFGTAGQPLAIHGRVLIGEGVLTKLCRKKPKARQFFLFND  
ILVYGNIVIQKKKYNKQHIIPLENVTIDSIEDEGDLRNGWLIKTPTKSFAVYAATATEKS  
EWMNHINKCVYDLISKSGKTPNSEHAAVWIPDSEATVCMRCSKVKFTPVSRRHHCRKCGF  
VICGPCSEKKFLLPNQSSKPVRVCDFCYDVLASGDLQCQAGRSDSLSSSPKFGHNLSND  
DDDDSSD

>*Naja\_naja*(Indian\_cobra)

MVDRLANSEANTRRISVVENCFGAAGQPLTIPGRVLIGEGVLTKLCRKKPKARQFFLFND  
ILVYGNIVIQKKKYNKQHIIPLENVTIESIQDEGDLRNGWLIKTPTKSFAVYAATATEKS  
EWMNHINKCVSDLLSKSGKTPSNEHAAVWVPDSEATACMRCQKAKFTPVNRRHHCRKCGF  
VVCGPCSEKRFLIPSQSSKPVRICDFCYEFLSMGEMPACQPTRSDSFSQSPKPPLNDISD  
DDDDDDSSD

>*Phocoena\_sinus*(Vaquita)

MVDRLANSEANTRRINIVENCFGAAGQPLTIPGRVLIGEGVLTKLCRKKPKARQFFLFND  
ILVYGNIVIQKKKYNKQHIIPLENVTIDSIKDEGDLRNGWLIKTPTKSFAVYAATATEKS  
EWMNHINKCVTDLLSKSGKTPSNEHAAVWVPDSEATVCMRCQKAKFTPVNRRHHCRKCGF  
VVCGPCSEKRFLLPQSSKPVRICDFCYDLLSTGDMATCQPTRSDSYSQSLKSTLNDVSD  
DDDDDDSSD

>*Sciurus\_vulgaris\_1\_*(Eurasian\_red\_squirrel)

MVDRLANSEANTRRISIVENCFGAAGQPLTIPGRVLIGEGVLTKLCRKKPKARQFFLFND  
ILVYGNIVIQKKKYNKQHIIPLENVTIDSIKDEGDLRNGWLIKTPTKSFAVYAATATEKS  
EWMNHINKCVTDLLSKSGKTPSNEHAAVWVPDSEATVCMRCQKAKFTPVNRRHHCRKCGF

VVCGPCSEKRFLLPSSKPVRICDFCYDLLSTGDMATCQPTRSDSYSQSSKSPLNDVSD  
DDDDDDSSD

>*Oncorhynchus\_kisutch*(Coho\_salmon)

MGGEAKMVDRLANSEANSKRIQVVEGCFGAAGQPLVIPGRVLIGEGVLTCLCRKKPKARQ  
FFLFNDILVYGNIVIQKKKYNKQHIIPLESVTIDTVADEGDLRNGWLIKTPTKSFAVYAA  
TATEKSEWMSHIGKCVGDLLEKSGKAPTGEHAAVWIPDSEATLCMRCQKIKFTPLSRRHH  
CRKCGYVVCGPCSDKKFLLPSQSSKPV RVCEFCYLQLASAGGGMGLGPHSDSYSRSGSKF  
NNVSDDDEEDSSD

>*Sciurus\_vulgaris\_2\_*(Eurasian\_red\_squirrel)

MVDRLANSEANTRRLSIVENCFGAAGQPLTIPGRVLIGEGVLTCLCRKKPKARQFFLFND  
ILVYGNIVIQKKKYNKQHIIPLENTIDSIDEGDLRNGWLIKTPTKSFAVYAATATEKS  
EWMNHINKCVTDLLSKSGKTPSNEHTAIWVPDSEATVCMHCQKAKFTPVNRRHHCRKCGF  
VVCGPCSEKRFLLPNQSSKPV RICDFCYDLLSTGDMATCQPTRSDSYSQSSKSPLNNVSD  
DDDDDDSSD

>*Terrapene\_carolina*(Three-toed\_box\_turtle)

MVDRLANSEANTRRISIVENCFGAAGQPLTIPGRVLIGEGVLTCLCRKKPKARQFFLFND  
ILVYGNIVIQKKKYNKQHIIPLENTIDSIDEGDLRNGWLIKTPTKSFAVYAATATEKS  
EWMNHINKCVSDLLSKSGKTPSNEHAAVWVPDSEATVCMRCQKAKFTPVNRRHHCRKCGF  
VVCGPCSEKRFLLPSSKPV RICDFCYDLLSTGEMTTCQPTRSDSYSQSPKSPLNDVSD  
DDDDDDSSD

>*Salmo\_salar\_1\_*(Atlantic\_salmon)

MVDRLANSEANSKRIQVVEGCFGTAGQPLVIPGRVLIGEGVLTCLCRKKPKARQFFLFND  
ILVYGNIVIQKKKYNKQHIIPLESVTIDTVADEGDLRNGWLIKTPTKSFAVYAATATEKS  
EWMNHIGKCVGDLLEKSGKAPTGEHAAVWIPDSEATLCMRCQKIKFTPLSRRHHCRKCGY  
VVCGPCSDKKFLLPSQSSKPV RVCEFCYLQLASAGGGMGLGPRSDSYSRSGSKFNNVSDD  
EDEDSSD

>*Catagonus\_wagneri*(Chacoan\_peccary)

MVDRLANSEANTRRINIVENCFGAAGQPLTIPGRVLIGEGVLTCLCRKKPKARQFFLFND  
ILVYGNIVIQKKKYNKQHIIPLENTIDSIDEGDLRNGWLIKTPTKSFAVYAATATEKS  
EWMNHINKCVTDLLSKSGKTPSNEHAAVWVPDSEATVCMRCQKAKFTPVNRRHHCRKCGF

VVCGPCSEKRFLFPSQSSKPVRICDFCYDLLSTGDMATCQPTRSDSYSQSLKAPLNDVSD  
DDDDDDSSD

>*Pseudonaja\_textilis*(Eastern\_brown\_snake)

MVDRLANSEANTRRISVVENCFGAAGQPLTIPGRVLIGEGVLTCLCRKKPKARQFFLFND  
ILVYGNIVIQKKKYNKQHIIPLENVTIESIQDEGDLRNGWLIKTPTKSFAVYAATATEKS  
EWMNHINKCVSDLLSKSGKTPSNEHAAVWVPDSEATVCMRCQKAKFTPVNRRHHCRKCGF  
VVCGPCSEKRFLIPSQSSKPVRICDFCYEFLSMGEMSTCQPTRSDSFSQSPKPPLNDISD  
DDDDDDSSD

>*Tetraodontidae*(Fugu)

MVDRLANSEANSKRIAIVEGCFGTAGQPLAIPGRVLIGEGILTKVCRKKPKTRQFFLFND  
ILVYGNILIQKKKYNKQHIIPLESVTIDTVPDDGDLRNGWLIKTPTKSFAVYAATATEKS  
EWMNHIGKCVNDLVQKSGKAPTGEHAAVWVPDSEATVCMRCQKVKFTPVSRRHHCRKCGL  
VVCGPCSEKKYLLPSQSSKPVRVCEFCYMQLTSGGLAPRSDSLSRPGSKFNNTSNLSDDDD  
DDDSSD

>*Moschus\_moschiferus*(Siberian\_musk\_deer)

MVDRLANSEANTRRINIVENCFGAAGQPLTIPGRVLIGEGVLTCLCRKKPKARQFFLFND  
ILVYGNIVIQKKKYNKQHIIPLENVTIDSIKDEGDLRNGWLIKTPTKSFAVYAATATEKS  
EWMNHINKCVTDLLSKSGKTPSNEHAAVWVPDSEATVCMRCQKAKFTPVNRRHHCRKCGF  
VVCGPCSEKRFLFPSQSSKPVRICDFCYDLLSTGDMATCQPARSDSYSQSLKPPLNDVSD  
DDDDDDSSD

>*Equus\_caballus*(Horse)

MVDRLANSEANTRRINIVEHCFGAAGQPLTIPGRVLIGEGVLTCLCRKKPKARQFFLFND  
ILVYGNIVIQKKKYNKQHIIPLENVTIDSIKDEGDLRNGWLIKTPTKSFAVYAATATEKS  
EWMNHINKCVTDLLSKSGKTPSNEHAAVWVPDSEATVCMRCQKAKFTPVNRRHHCRKCGF  
VVCGPCSEKRFLFPSQSSKPVRICDFCYDLLSTGDMAACQPPRSDTYSQSLKSPLNDVSD  
DDDDDDSSD

>*Salmo\_salar\_2\_*(Atlantic\_salmon)

MVDRLANSEANSKRIQVVEGCFGAAGQPLVIPGRVLIGEGVLTCLCRKKPKARQFFLFND  
ILVYGNIVIQKKKYNKQHIIPLESVTIDTVADEGDLRNGWLIKTPTKSFAVYAATATEKS  
EWMNHIGKCVGDLLEKSGKAPTGEHAAVWIPDSEATLCMRCQKIKFTPLSRRHHCRKCGY

VVCGPCSDKKFLLPSQSSKPVRVCEFCYLQLASAGGGTGLGPRSDSYSRSGSKFNNVSDD  
EDEEDSSD

>*Larimichthys\_crocea*(Large\_yellow\_croaker)

MVDRLANSEANSKRIAVVEGCFGTAGQPLAIPGRVLIGEGVLTCLCRKKPKARQFFLFND  
ILVYGNIVIQKKKYNKQHIIPLESVTIDTVPDEGDLRNGWLIKTPTKSFAVYAATATEKS  
EWMNHIGKCVGDLLQKSGKAPTGEHAADVVPDSEATVCMRCQKVKFTPVSRRHHCRKCGY  
VVCGPCSEKKYLLPSQSSKPVRVCEYCFVQLTSGSLGPRSDSISRPGSKFNNLSDDDDDED  
DSSD

>*Cottoperca\_gobio*(Channel\_bull\_blenny)

MVDRLANSEANSKRIAVVEGCFGAAGQPLAIPGRVLIGEGVLTCLCRKKPKARQFFLFND  
ILVYGNIVIQKKKYNKQHIIPLESVTIDTVPDEGDLRNGWLIKTPTKSFAVYAATATEKS  
EWMNHIGKCVGDLLQKSGKAPTGEHAADVWIPDSEATVCMRCQKVKFTPVSRRHHCRKCGY  
VVCGPCSEKKYLLPSQSSKPVRVCEYCFVQLTSGGPRSDSITRLGSKFNNLSDDDDDEDSD  
SD

>*Xenopus\_tropicalis*(Western\_clawed\_frog)

MVDRLANSEANSKRINLVESCFGTAGQPLAIPGRVLIGEGVLTCLCRKKPKARQFFLFND  
ILVYGNIVIQKKKYNKQHIIPLENTIDTIEDEGELRNGWLIKTPTKSFAVYAATATEKS  
EWMNHINKCVCDLISKSGKTPNSEHAADVWIPDSEATICMRCKKVKFTPVNRRHHCRKCGY  
VICGPCSEKRYLLPSQSSKPVRVCDFCYDLLSNGDFSSCLPSRSDSFHPSKSKNNLSDD  
DDDEDSSD

>*Sus\_scrofa*(Pig)

MVDRLANSEANTRRINIVENCFGAAGQPLTIPGRVLIGEGVLTCLCRKKPKARQFFLFND  
ILVYGNIVIQKKKYNKQHIIPLENTIDSIDEGDLRNGWLIKTPTKSFAVYAATATEKS  
EWMNHINKCVTDLLSKSGKTPSNEHAADVVPDSEATVCMRCQKAKFTPVNRRHHCRKCGF  
VVCGPCSEKRFLPSQSSKPVRICDFCYDLLSTGDMATCQPTRSDSYSQSLKSPLNDVSD  
DDDDDDSSD

>*Erpetoichthys\_calabaricus*(Reedfish)

MVDRLANSEANSKRIAVVEGCFGAAGQPLAIPGRVLIGEGVLTCLCRKKPKARQFFLFND  
ILVYGNIVIQKKKYNKQHIIPLENTIDSIDEGDLRNGWLIKTPTKSFAVYAATATEKS  
EWMNHISKCVTDLLEKSGKAPNNEHAADVVPDSEASVCMRCQKIKFTPVNRRHHCRKCGF



VVCGPCSEKKFLLPSQSSKPVRVCDFCYHQLSSGQLSASLPTRSDSYSRASKFSTNNMSD  
DDDDDDSSD

>*Sparus\_aurata*(Gilt-head\_bream)

MVDRLANSEANSKRIAVVEGCFGAAGQPLAIPGRVLIGEGVLTCLCRKKPKARQFFLFND  
ILVYGNIVIQKKKYNKQHIIPLESVTIDTVPDEGDLRNGWLIKTPTKSFAVYAATATEKS  
EWMNHIGKCVGDLLQKSGKAPTGEHAADVWVPDSEATVCMRCQKVKFTPVSRRHHCRKCGF  
VVCGPCSEKKYLLPSQSSKPVRVCEYCFVQLTSGGLAPRSDSISRPGSKFNSNNLSDDDD  
EDDSSD

>*Struthio\_camelus*(Ostrich)

MVDRLANSEANTRRISIVENCFGAAGQPLTIPGRVLIGEGVLTCLCRKKPKARQFFLFND  
ILVYGNIVIQKKKYNKQHIIPLENVTIDSIQDEGDLRNGWLIKTPTKSFAVYAATATEKS  
EWMNHINKCVSDLLSKSGKTPSNEHAADVWVPDSEATVCMRCQKAKFTPVNRRHHCRKCGF  
VVCGPCSEKRFLPSQSSKPVRICDFCYDLLSTGEMTTCQSTRSDSYSQSPKSPLNDVSD  
DDEDEDSSD

>*Salmo\_trutta\_1*\_(Brown\_trout)

MSAGEAKMVDRLANSEANSKRIQVVEGCFGAAGQPLVIPGRVLIGEGVLTCLCRKKPKAR  
QFFLFNDILVYGNIVIQKKKYNKQHIIPLESVTIDTVADEGDLRNGWLIKTPTKSFAVYA  
ATATEKSEWMHIGKCVGDILLEKSGKAPTGEHAADVWIPDSEATLCMRCQKIKFTPLSRRH  
HCRKCGYVVCGPCSDKKFLLPSQSSKPVRVCEFCYLQLASAGGGTGLGPRSDSYSRSGSK  
FNNVSDDEDEEDSSD

>*Panthera\_leo*(Lion)

MVDRLANSEANTRRINIVENCFGAAGQPLTIPGRVLIGEGVLTCLCRKKPKARQFFLFND  
ILVYGNIVIQKKKYNKQHIIPLENVTIDSIKDEGDLRNGWLIKTPTKSFAVYAATATEKS  
EWMNHINKCVTDLLSKSGKTPSNEHAADVWVPDSEATVCMRCQKAKFTPVNRRHHCRKCGF  
VVCGPCSEKRFLPSQSSKPVRICDFCYDLLSTGDMATCQPTRSDSYSQSLKSPLNDVSD  
DDDDDDSSD

>*Camelus\_dromedarius*(Arabian\_camel)

MVDRLANSEANTRRINIVENCFGAAGQPLTIPGRVLIGEGVLTCLCRKKPKARQFFLFND  
ILVYGNIVIQKKKYNKQHIIPLENVTIDSIKDEGDLRNGWLIKTPTKSFAVYAATATEKS  
EWMNHINKCVTDLLSKSGKTPSNEHAADVWVPDSEATVCMRCQKAKFTPVNRRHHCRKCGF

VVCGPCSEKRFLFPSQSSKPVRICDFCYDLLSAGDMATCQPARSDSYSQSLKSPLNDVSD  
DDDDDDSSD

>*Denticeps\_clupeioides*(Denticle\_herring)

MVDRLANSEANSKRIAVVEGCFGTAGQPLAIPGRVLIGEGVLTKLCRKKPKARQFFLFND  
ILVYGNIVIQKKKYNKQHIIPLESVTIDTVADEGDLRNGWLIKTPTKSFAVYAATATEKS  
EWM SHINKCVSDLLEKSGKSPSGEHAADVVPDSEATVCMRCQKVRFTPVNRRHHCRKCGF  
VVCGPCSEKKFLFPSQSSKPVRVCEFCHEQLSSASGLPPRSDSYSRPRSNFGSNNVSEDD  
DDDDSSD

>*Ornithorhynchus\_anatinus*(Platypus)

MVDRLANSEANTRRISIVESCFGAAGQPLTIPGRVLIGEGVLTKLCRKKPKARQFFLFND  
ILVYGNIVIQKKKYNKQHIIPLENTIDSIQDEGELRNGWLIKTPTKSFAVYAATATEKS  
EWMNHINKCVSDLLSKSGKTPSNEHAADVWIPDSEATVCMRCQKAKFTPVNRRHHCRKCGF  
VVCGPCSEKRFLFPSQSSKPVRICDFCHELLSSGEMTACQPTRSDPYSQSPKSPLNNTSD  
DDDDDDSSD

>*Macaca\_mulatta*(Macaque)

MVDRLANSEANTRRISIVENCFGAAGQPLTIPGRVLIGEGVLTKLCRKKPKARQFFLFND  
ILVYGNIVIQKKKYNKQHIIPLENTIDSIKDEGDLRNGWLIKTPTKSFAVYAATATEKS  
EWMNHINKCVTDLLSKSGKTPSNEHAADVVPDSEATVCMRCQKAKFTPVNRRHHCRKCGF  
VVCGPCSEKRFLFPSQSSKPVRICDFCYDLLSTGDMATCQPARSDSYSQSLKSPLNDMSD  
DDDDDDSSD

>*Oreochromis\_niloticus*(Nile\_tilapia)

MVDRLANSEANSKRIAVVESCFGAAGQPLAIPGRVLIGEGVLTKLCRKKPKARQFFLFND  
ILVYGNIVIQKKKYNKQHIIPLESVTIDTVPDEGDLRNGWLIKTPTKSFAVYAATATEKS  
EWMNHIGKCVGDLLQKSGKSPTGEHAADVVPDSEASVCMRCKKVKFTPVSRRHHCRKCGF  
VVCGPCSEKKYLLFPSQSSKPVRVCEHCYEQLTSVNLQARSDSITRGSKFHSNNLSDDDDDD  
DDSSD

>*Monodelphis\_domestica*(Gray\_short-tailed\_opossums)

MAAPTLALAWAPILRGGHNCCLRGHAPLGLSAPRKGFPVGLGRRATASSRTEVPGNDRYC  
VELLRKRDIYEGYLCCLLLPTEARSSAFALRAFNAELAQVKDSISQKTIGQMRMQFWRKAV  
EDMYSDNPPHQPVAIELWKAVKRHNLTKRWLVKIIDEREKNLDDKAYRNIQELEAYAENT

QSSLLYLTLVLGVRNVHADHAASHIGKAQGIITCLRATPYHSSRRKVFLPMDICMLHGV  
SQEDFLRKNQDKNVRDVIYDIASQGHLHLIHARSFQKSVPVKAFFAFLQTATKQKMVDRL  
ANSEANTRRISIVENCFGAAGQPLTIPGRVLIGEGVLTCLCRKKPKARQFFLFNDILVYG  
NIVIQKKKYNKQHIIPLENTIDSIDEGDLRNGWLIKTPTKSFAVYAATATEKSEWMNH  
INKCVTDLLSKSGKTPSNEHAAVWVPDSEATVCMRCQKAKFTPVNRRHHCRKCGFVVCGP  
CSEKRFLFPSQSSKPVRICDFCFDILLSTGDLATCQPTRSDSYSQSPKSLNNVSDDEDDED  
SSD

>*Cyprinus\_carpio\_1\_*(Common\_carp)

MVDRLANSEANSKRIGVVEACFGTAGQPLAIPGRVLIGEGVLTCLCRKRPKARQFFLFND  
ILVYGNIVIQKKKYNKQHIIPLESVTIDTVEDEGDLRNGWLIKTPTKSFAVYAATATEKS  
EWMISHISKCVSDLLEKSGKSPTGEHAAVWVPDSEATVCMRCQKVKFTPVNRRHHCRKCGF  
VVCGPCSEKKFLLPSQSSKPVRVCEFCYKQLSSDSYSHSEISGNNISDDDDDDDDSSD

>*Callithrix\_jacchus*(Common\_marmoset)

MVDRLANSEANTRRISIVENCFGAAGQPLTIPGRVLIGEGVLTCLCRKKPKARQFFLFND  
ILVYGNIVIQKKKYNKQHIIPLENTIDSIDEGDLRNGWLIKTPTKSFAVYAATATEKS  
EWMNHINKCVTDLLSKSGKTPSNEHAAVWVPDSEATVCMRCQKAKFTPVNRRHHCRKCGF  
VVCGPCSEKRFLFPSQSSKPVRICDFCYDLLSTGDMATCQPARSDSYSQSLKSPLNDMSD  
DDEDDDSSD

>*Cyprinus\_carpio\_2\_*(Common\_carp)

MVDRLANSEANSKRIGVVEACFGTAGQPLAIPGRVLIGEGVLTCLCRKRPKARQFFLFND  
ILVYGNIVIQKKKYNKQHIIPLESVTIDTVEDEGDLRNGWLIKTPTKSFAVYAATATEKS  
EWMISHISKCVSDLLEKSGKSPTGEHAAVWVPDSEATVCMRCQKIKFNPVNRRHHCRKCGF  
VVCGPCSEKKFLLPSQSSKPVRVCEFCYKQLSTGGTLPARSDSYSRSEFSSNNISDDDDDD  
DDSSD

>*Scleropages\_formosus*(Asian\_aronana)

MVDRLANSEANSKRIAVVEGCFGAAGQPLAIPGRVLIGEGVLTCLCRKKPKARQFFLFND  
ILVYGNIVIQKKKYNKQHIIPLESVTIDTVEDEGELRNGWLIKTPTKSFAVYAATATEKS  
EWMNHINKCVSDLLLKSGKSPSNEHAAVWVPDSEASVCMRCQKVKFTPVSRRHHCRKCGF  
VVCGPCSEKKFLLPSQSSKPVRVCEFCYEQLSAGQMSGGLPPRSDSYSRSSSRFPGSNVS  
EDEEEEDSSD

>*Oryzias\_sinensis*(Chinese\_rice\_fish)

MVDRLANSEANSKRIGMVESCFGAAGQPLAIPGRVLIGEGVLTCLCRKKPKARQFFLFND  
ILVYGNIVIQKKKYNKQHIIPLESVTIDTVPDEGDLRNGWLIKTPTKSFAVYAATATEKC  
EWMNHIGKCVKDLLQKSGKSPTGEHAAVWVPDSEASVCMRCLKVKFTAVNRRHHCRKCGY  
VVCNPCSEKKYLLPSQSSKPVRVCEFCYAQLTSGSLAPCSDSNNWSESRYNNNHLSDDDED  
EDDSSD

>*Clupea\_harengus*(Atlantic\_herring)

MVDRLANSEANNKRIGVVEGCFGTAGQPLAIPGRVLIGEGVLTCLCRKKPKARQFFLFND  
ILVYGNIVIQKKKYNKQHIIPLESVTIDTVADEGDLRNGWLIKTPTKSFAVYAATATEKS  
EWMNHIGKCVTDLLSKSGKAPSGEHAAVWVPDSEATICMRCLKVKFTPVSRRHHCRKCGF  
VVCGPCSDKKFLPSQSSKPVRVCEFCYEQLSLGTGLHTGRPDYPYGRSPGNNVSDDDDDED  
DSSD

>*Gopherus\_evgoodei*(Goode's\_thornscrub\_tortoise)

MVDRLANSEANTRRISIVENCFGAAGQPLTIPGRVLIGEGVLTCLCRKKPKARQFFLFND  
ILVYGNIVIQKKKYNKQHIIPLENTIDSIQDEGDLRNGWLIKTPTKSFAVYAATATEKS  
EWMNHINKCVSDLLSKSGKTPSNEHAAVWVPDSEATVCMRCQKAKFTPVNRRHHCRKCGF  
VVCGPCSEKRFLPSQSSKPVRICDFCYDLLSTGEMTTCQPTRSDSYSQSPKSPLNDVSD  
DDDDDDSSD

>*Physeter\_macrocephalus*(Sperm\_whale)

MVDRLANSEANTRRINIVENCFGAAGQPLTIPGRVLIGEGVLTCLCRKKPKARQFFLFND  
ILVYGNIVIQKKKYNKQHIIPLENTIDSIKDEGDLRNGWLIKTPTKSFAVYAATATEKS  
EWMNHINKCVTDLLSKSGKTPSNEHAAVWVPDSEATVCMRCQKAKFTPVNRRHHCRKCGF  
VVCGPCSEKRFLPSQSSKPVRICDFCYDLLSTGDMATCQPARSDSYSRSLKSPLNDVSD  
DDDDDDSSD

>*Laticauda\_laticaudata*(blue-lipped\_sea\_krait)

MVDRLANSEANTRRISVVENCFGAAGQPLTIPGRVLIGEGVLTCLCRKKPKARQFFLFND  
ILVYGNIVIQKKKYNKQHIIPLENTIESIQDEGDLRNGWLIKTPTKSFAVYAATATEKS  
EWMNHINKCVSDLLSKSGKTPSNEHAAVWVPDSEATVCMRCQKAKFTPVNRRHHCRKCGF  
VVCGPCSEKRFLIPSQSSKPVRICDFCYEFLSMGEMSTCQPTRSDSFSQSPKPPLNDISD  
DDDDDDSSD

>*Podarcis muralis*(Common\_wall\_lizard)

MVDRLANSEANTRRISIVENCFGAAGQPLTIPGRVLIGEGVLTKLCRKKPKARQFFLFND  
ILVYGNIVIQKKKYNKQHIIPLENTIESIQDEGDLRNGWLIKTPTKSFAVYAATATEKS  
EWMNHINKCVSDLLSKSGKTPSNEHAAVWVPDSEATVCMRCQKAKFTPVNRRHHCRKCGF  
VVCGPCSEKRFLIPSQSSKPVRICDFCYDLLSTGEMPTCQPTRSDSYSHPPKLPLNDMSD  
DDDDDDSSD

>*Delphinapterus leucas*(Beluga\_whale)

MVDRLANSEANTRRINIVENCFGAAGQPLTIPGRVLIGEGVLTKLCRKKPKARQFFLFND  
ILVYGNIVIQKKKYNKQHIIPLENTIDSIDEGDLRNGWLIKTPTKSFAVYAATATEKS  
EWMNHINKCVTDLLSKSGKTPSNEHAAVWVPDSEATVCMRCQKAKFTPVNRRHHCRKCGF  
VVCGPCSEKRFLIPSQSSKPVRICDFCYDLLSAGDMATCQPTRSDSYSQSLKSTLNDVSD  
DDDDDDSSD

>*Oncorhynchus tshawytscha*\_I\_(Chinook\_salmon)

MSPAASICLLHEDKGFAMVTHLGKPWVIFRCTVSQFETERRLFCIGCLFCSTLQEGEAKM  
VDRLANSEANSKRIQVVEGCFGAAGQPLVIPGRVLIGEGVLTKLCRKKPKARQFFLFNDI  
LVYGNIVIQKKKYNKQHIIPLESVTIDTVADEGDLRNGWLIKTPTKSFAVYAATATEKSE  
WMSHIGKCVGDLLEKSGKAPTGEHAAVWIPDSEATLCMRCQKIKFTPLSRRHHCRKCGYV  
VCGPCSDKKFLLPSQSSKPVRVCEFCYLQLASAGGGMGLGPRSDSYSRSGSKFNNDVSDDE  
DEEDSSD

>*Betta splendens*(Siamese\_fighting\_fish)

MKETHRFFRLIWTTTQIRATKSYHRTPEVKMVDRLANSEANSKRIAVVESCFAAGQPL  
AIPGRVLIGEGVLTKLCRKKPKSRQFFLFNDILVYGNIVIQKKKYNKQHIIPLESVTIDT  
VPDEGDLRNGWLIKTPTKSFAVYAATATEKSEWMNHIGRCVEELLQKSGKAPIGEHAAVW  
VPDSEASVCMRCQKVKFTPVSRHHCRKCGFVVCGPCSDKRHLLPSQSSKPVRVCEYCYL  
QLTSGNHTPRSECISRP GSKFNNDNL TDEEEEDDSSD

>*Oncorhynchus mykiss*\_I\_(Rainbow\_trout)

MVDRLANSEANSKRIQVVEGCFGAAGQPLVIPGRVLIGEGVLTKLCRKKPKARQFFLFND  
ILVYGNIVIQKKKYNKQHIIPLESVTIDTVADEGDLRNGWLIKTPTKSFAVYAATATEKS  
EWMNHIGKCVGDLLEKSGKAPTGEHAAVWIPDSEATLCMRCQKIKFTPLSRRHHCRKCGY  
VVCGPCSDKKFLLPSQSSKPMNLGVHASMLIFLQGEAISIQSHVTWSTYSFYFR

>*Oncorhynchus\_mykiss\_2\_*(Rainbow\_trout)

MVDRLANSEANSKRIQVVEGCFGAAGQPLVIPGRVLIGEGVLTCLCRKKPKARQFFLFND  
ILVYGNIVIQKKKYNKQHIIPLESVTIDTVADEGDLRNGWLIKTPTKSFAVYAATATEKS  
EWMSHIGKCVGDLLEKSGKAPTGEHAAVWIPDSEATLCMRCQKIKFTPLSRRHHCRKCGY  
VVCGPCSDKKFLLPSQSSKPVRVCEFCYLQLASAGGGMGLGPRSDSYSRSGSKFNNVSDD  
EDEEDSSD

>*Salmo\_trutta\_2\_*(Brown\_trout)

MVDRLANSEANSKRIQVVEGCFGTAGQPLVIPGRVLIGEGVLTCLCRKKPKARQFFLFND  
ILVYGNIVIQKKKYNKQHIIPLESVTIDTVADEGDLRNGWLIKTPTKSFAVYAATATEKS  
EWMSHIGKCVGDLLEKSGKAPTGEHAAVWIPDSEATLCMRCQKIKFTPLSRRHHCRKCGY  
VVCGPCSDKKFLLPSQSSKPVRVCEFCYLQLASAGGGMGLGPRSDSYSRSGSKFNNVSDD  
EDEEDSSD

>*Dicentrarchus\_labrax*(European\_bass)

MVDRLANSEANSKRIAVVEGCFGAAGQPLAIPGRVLIGEGVLTCLCRKKPKARQFFLFND  
ILVYGNIVIQKKKYNKQHIIPLESVTIDTVPDEGDLRNGWLIKTPTKSFAVYAATATEKS  
EWMSHIGKCVGDLQKSGKAPTGEHAAVWVPDSEATVCMRCQKVKFTPVSRRHHCRKCGY  
VVCGPCSEKKYLLPSQSSKPVRVCEYCFVQLTSGGLGPRSDSIGRPVSKFNSNNLSDDDD  
EDDSSD

>*Oryzias\_javanicus*(Javanese\_Ricefish)

MVDRLANSEANSKRIAMVESCFGAAGQPLAIPGRVLIGEGVLTCLCRKKPKARQFFLFND  
ILVYGNIVIQKKKYNKQHIIPLESVTIDTVPDEGDLRNGWLIKTPTKSFAVYAATGTEKC  
EWMNHIGKCVRDLLQKSGKSPTGEHAAVWVPDSEAPICMRCEKVKFTPVIRRHCRKCGY  
VVCGPCSEKKYLIPSQSSKPVRVCEYCYSQLTSGSHAPRSDSNNWAESRYNNNHLSDDED  
EDDSSD

>*Salmo\_salar\_3\_*(Atlantic\_salmon)

MVDRLANSEANSKRIQVVEGCFGAAGQPLVIPGRVLIGEGVLTCLCRKKPKARQFFLFND  
ILVYGNIVIQKKKYNKQHIIPLESVTIDTVADEGDLRNGWLIKTPTKSFAVYAATATEKS  
EWMSHIGKCVGDLLEKSGKAPTGEHAAVWIPDSEATLCMRCQKIKFTPLSRRHHCRKCGY  
VVCGPCSDKKFLLPSQSSKPVRVCEFCYLQLASIHSLHSSVLGKSNFFF

>*Myripristis\_murdjan*(Pinecone\_soldierfish)

MVDRLANSEANSKRIAVVESCFGAAGQPLAIPGRVLIGEVLTCLCRKKPKARQFFLFND  
ILVYGNIVIQKKKYNKQHIIPLESVTIDTVPDEGDLRNGWLIKTPTKSFAVYAATATEKS  
EWMNHIGKCVGDLLQKSGKTPTGEHAAVWVPDSEATVCMRCQKVKFTPVSRRHHCRKCGF  
VVCGPCSEKKYLLPSQSSKPVRVCEYCYVQLTSSGGGLAPRFDsisRTGSKFNSNNVSDD  
EDEDSSD

>*Sarcophilus\_harrisii*(Tasmanian\_devil)

MVDRLANSEANTRRISIVENCFAAGQPLTIPGRVLIGEVLTCLCRKKPKARQFFLFND  
ILVYGNIVIQKKKYNKQHIIPLENTIDSIKDEGDLRNGWLIKTPTKSFAVYAATATEKS  
EWMNHINKCVTDLLSKSGKTPSNEHAAVWVPDSEATVCMRCQKAKFTPVNRRHHCRKCGF  
VVCGPCSEKRFLPSQSSKPVRICDFCFDLLSSGDLATCQPTRSDSYSQSTKSPLNNVSDD  
DEDEDSSD

>*Carassius\_auratus\_1\_*(Goldfish)

MVDRLANSEANSKRIGVVETCFGTAGQPLAIPGRVLIGEVLTCLCRKRPKARQFFLFND  
ILVYGNIVIQKKKYNKQHIIPLESVTIDTVEDEGELRNGWLIKTPTKSFAVYAATATEKS  
EWMNHISKCVSDLLEKSGKSPTGEHAAVWVPDSEATVCMRCQKIKFNPVNRRHHCRKCGF  
VVCGPCSEKKFLLPSQSTKPVRVCEFCYKQLSTGGTLPSRSDSLLSSNNISDDDDDDSS  
D

>*Oncorhynchus\_tshawytscha\_2\_*(Chinook\_salmon)

MSEAKMVDRLANSEANSKRIQVVEGCFGAAGQPLVIPGRVLIGEVLTCLCRKKPKARQF  
FLFNDILVYGNIVIQKKKYNKQHIIPLESVTIDTVAEEGDLRKGWLIKTPTKSFAVYAAT  
ATEKSEWMNHIGKCVGDLLKSGKAPTGEHAAVWVPDSEATLCMRCQKIKFTPLSRRHHC  
RKCGYVVCGPCSDKKFLLPSQSSKPVRVCEFCYLQLASAGGGMGLGPRSDSYSRSGSKFN  
NVSDDEDEEDSSD

>*Carassius\_auratus\_2\_*(Goldfish)

MVDRLANSEANSKRIGVVEACFGTAGQPLAIPGRVLIGEVLTCLCRKRPKARQFFLFND  
ILVYGNIVIQKKKYNKQHIIPLESVTIDTVEDEGDLRNGWLIKTPTKSFAVYAATASEKS  
EWMNHISKCVSDLLEKSGKSPTGEHAAVWVPDSEATVCMRCQKIKFNPVNRRHHCRKCGF  
VVCGPCSEKKFLLPSQSTKPVRVCEFCYKQLSSGSYTHLEISGNNISDDDDDDSSD

>*Mus\_musculus*(Mouse)

MVDRLANSEANTRRISIVESCFGAAGQPLTIPGRVLIGEVLTCLCRKKPKARQFFLFND

ILVYGNIVIQKKKYNKQHIIPLENVTIDSIKDEGELRNGWLIKTPTKSFAVYAATATEKS  
EWMNHINKCVTDLLSKSGKTPSNEHAAVWVPDSEATVCMRCQKAKFTPVNRRHHCRKCGF  
VVCGPCSEKRFLLPSSQSSKPVRICDFCYDLLSTGDMAACQPTRSDSYSQSLKSPLNDASD  
DDDDDDSSD

>*Gadus\_morhua*(Atlantic\_cod)

MVDRLANSEANSKRIGVVEGCFGAAGQPLVIPGRVLIGEGVLTKLCRKRPKARQFFLFND  
ILVYGNIVIQKKKYNKQHIIPLESVTIDTVPDEGDLRNGWLIKTPTKSFAVYAATATEKS  
EWMNHIAKCVADLLSKSGKSPTGEHAAVWVPDSEATVCMRCLKVKFTPVSRRHHCRKCGF  
VVCGPCSDKKYLLPSQSSKPVRVCEFCYVHLTSAVGGYAQRADSFGRQGFNLSDDDEDED  
SSD

>*Drosophila\_melanogaster*(Fruit\_fly)

MVDRLVNSEANTRRIASVENCFGSSGVPLAMQGRVLVGEGVLTKMCRKRPKSRQFFLFND  
ILVYGNIVIGKKKYNKQHIMPLEEVSLESIADNQTYRNGWYIRTTTKSFVVF AATSTEKQ  
EWMAHINKCVEDLLRKSGKKPVENHAAVWVPD TDASVCMHCKKTQFTFIQRRHHCRNCGA  
VVCAGCSAKKFLLPQQSTKALRVCDACYERLKHVPSSLGSGEDSAAATGAASGNKLNTTA  
GDSSNDEDSDEETASPGGESHDEPRFYGDNSVLSAVEDSSTITSPSSATTGSLEAPQVTP  
SVQSSPAAVATTGSHC

>*Ailuropoda\_melanoleuca*(Giant\_panda)

MVDRLANSEANTRRINIVENCFGAAGQPLTIPGRVLIGEGVLTKLCRKKPKARQFFLFND  
ILVYGNIVIQKKKYNKQHIIPLENVTIDSIKDEGDLRNGWLIKTPTKSFAVYAATATEKS  
EWMNHINKCVTDLLSKSGKTPSNEHAAVWVPDSEATVCMRCQKAKFTPVNRRHHCRKCGF  
VVCGPCSEKRFLLPSSQSSKPVRICDFCYDLLSTGDMAACQPTRSDSHSQSLKSPLNDVSD  
DDDDDDSSD

>*Mastacembelus\_armatus*(Zig-zag\_eel)

MVDRLANSEANSKRIAVVESCFGTAGQPLAIPGRVLIGEGVLTKLCRKKPKARQFFLFND  
ILVYGNIVIQKKKYNKQHIIPLESVTIDTVPDEGDLRNGWLIKTPTKSFAVYAATATEKS  
EWMNHIGKCVEDLLQKSGKTPTGEHAAVWVPDSEASVCMRCQKVKFTPVSRRHHCRKCGF  
VVCGPCSEKKYLLPSQSSKPVRVCEYCFQLTAGSLAPRSDSISRPGSKFHSSNNLSDDDED  
EDDSSD

>*Macaca\_fascicularis*(Crab-eating\_macaque)



MVDRLANSEANTRRISIVENCFGAAGQPLTIPGRVLIGEGVLTKLCRKKPKARQFFLFND  
ILVYGNIVIQKKKYNKQHIIPLENVTIDSIKDEGDLRNGWLIKTPTKSFAVYAATATEKS  
EWMNHINKCVTDLLSKSGKTPSNEHAAVWVPDSEATVCMRCQKAKFTPVNRRHHCRKCGF  
VVCGPCSEKRFLFPSQSSKPVRICDFCYDLLSTGDMATCQPARSDSYSQSLKSPLNDMSD  
DDDDDDSSD

>*Anabas\_testudineus*(Climbing\_perch)

MVDRLANSEANSKRIAVVEGCFGAAGQPLAIPGRVLIGEGVLTKLCRKKPKARQFFLFND  
ILVYGNIVIQKKKYNKQHIIPLESVTIDTVPDEGDLRNGWLIKTPTKSFAVYAATATEKS  
EWMNHIGKCVEDLLQKSGKAPTGEHAAVWVPDSEASVCMRCQKVKFTPVSRRHHCRKCGF  
VVCGPCSEKKHLLPSQSSKPVRVCEYCYVQLTSGNHAPRSDCISRSKFNSNNLSDDDED  
DSSD

>*Felis\_catus*(Cat)

MVDRLANSEANTRRINIVENCFGAAGQPLTIPGRVLIGEGVLTKLCRKKPKARQFFLFND  
ILVYGNIVIQKKKYNKQHIIPLENVTIDSIKDEGDLRNGWLIKTPTKSFAVYAATATEKS  
EWMNHINKCVTDLLSKSGKTPSNEHAAVWVPDSEATVCMRCQKAKFTPVNRRHHCRKCGF  
VVCGPCSEKRFLFPSQSSKPVRICDFCYDLLSTGDMATCQPTRSDSYSQSLKSPLNDVSD  
DDDDDDSSD
