# Supplementary material for: The PH Domain and C-Terminal polyD Motif of Phafin2 Exhibit a Unique Concurrence in Animals
Source: MDPI journal article supplement (doi:10.3390/membranes12070696), 2022-07-07
Supplement: s1 [file s1]

## Supplementary File S6: Details of different modules found in model organisms

### Domains Architecture of *Arabidopsis thaliana*

| <i>No</i> | <i>Accession Number</i> | <i>Domains</i>                                                                             |
|-----------|-------------------------|--------------------------------------------------------------------------------------------|
| 1         | NP_001031110.1          | Las17-binding protein actin regulator, FYVE zinc finger                                    |
| 2         | NP_174273.3             | Las17-binding protein actin regulator, FYVE zinc finger                                    |
| 3         | NP_176362.3             | FYVE zinc finger                                                                           |
| 4         | NP_189909.1             | Las17-binding protein actin regulator, FYVE zinc finger                                    |
| 5         | NP_001320122.1          | Phosphatidylinositol-4-phosphate 5-Kinase, TCP-1/cpn60 chaperonin family, FYVE zinc finger |
| 6         | NP_001328750.1          | Phosphatidylinositol-4-phosphate 5-Kinase, TCP-1/cpn60 chaperonin family, FYVE zinc finger |
| 7         | NP_001190899.1          | Phosphatidylinositol-4-phosphate 5-Kinase, TCP-1/cpn60 chaperonin family, FYVE zinc finger |
| 8         | NP_001078484.4          | Phosphatidylinositol-4-phosphate 5-Kinase, TCP-1/cpn60 chaperonin family, FYVE zinc finger |
| 9         | NP_001328749.1          | Phosphatidylinositol-4-phosphate 5-Kinase, TCP-1/cpn60 chaperonin family, FYVE zinc finger |
| 10        | NP_564103.1             | FYVE zinc finger                                                                           |

|    |                |                                                                                                                                                                                      |
|----|----------------|--------------------------------------------------------------------------------------------------------------------------------------------------------------------------------------|
| 11 | NP_001319548.1 | Phosphatidylinositol-4-phosphate 5-Kinase, TCP-1/cpn60 chaperonin family, FYVE zinc finger                                                                                           |
| 12 | NP_001328535.1 | Regulator of chromosome condensation (RCC1) repeat, Transcription factor regulating root and shoot growth via Pin3, FYVE zinc finger, Transcription factor BRX N-terminal domain, PH |
| 13 | NP_001328536.1 | Regulator of chromosome condensation (RCC1) repeat, Transcription factor regulating root and shoot growth via Pin3, FYVE zinc finger, Transcription factor BRX N-terminal domain, PH |
| 14 | NP_001154232.2 | Regulator of chromosome condensation (RCC1) repeat, Transcription factor regulating root and shoot growth via Pin3, FYVE zinc finger, Transcription factor BRX N-terminal domain, PH |
| 15 | NP_001328534.1 | Regulator of chromosome condensation (RCC1) repeat, Transcription factor regulating root and shoot growth via Pin3, FYVE zinc finger, Transcription factor BRX N-terminal domain, PH |
| 16 | NP_001327882.1 | Regulator of chromosome condensation (RCC1) repeat, Transcription factor regulating root and shoot growth via Pin3, FYVE zinc finger, Transcription factor BRX N-terminal domain, PH |
| 17 | NP_188968.1    | Regulator of chromosome condensation (RCC1) repeat, Transcription factor regulating root and shoot growth via Pin3, FYVE zinc finger, Transcription factor BRX N-terminal domain, PH |
| 18 | NP_001318728.1 | Regulator of chromosome condensation (RCC1) repeat, Transcription factor regulating root and shoot growth via Pin3, FYVE zinc finger, Transcription factor BRX N-terminal domain, PH |
| 19 | NP_568268.3    | Regulator of chromosome condensation (RCC1) repeat, Transcription factor regulating root and shoot growth via Pin3, FYVE zinc finger, Transcription factor BRX N-terminal domain, PH |
| 20 | NP_001322526.1 | Regulator of chromosome condensation (RCC1) repeat, Transcription factor regulating root and shoot growth via Pin3, FYVE zinc finger, Transcription factor BRX N-terminal domain     |
| 21 | NP_177129.2    | Regulator of chromosome condensation (RCC1) repeat, Transcription factor regulating root and shoot growth via Pin3, FYVE zinc finger, Transcription factor BRX N-terminal domain     |
| 22 | NP_001190338.1 | Regulator of chromosome condensation (RCC1) repeat, Transcription factor regulating root and shoot growth via Pin3, FYVE zinc finger, Transcription factor BRX N-terminal domain, PH |
| 23 | NP_197443.3    | Regulator of chromosome condensation (RCC1) repeat, Transcription factor regulating root and shoot growth via Pin3, FYVE zinc finger, Transcription factor BRX N-terminal domain, PH |

|    |                |                                                                                                                                                                                      |
|----|----------------|--------------------------------------------------------------------------------------------------------------------------------------------------------------------------------------|
| 24 | NP_001330907.1 | Regulator of chromosome condensation (RCC1) repeat, Transcription factor regulating root and shoot growth via Pin3, FYVE zinc finger, Transcription factor BRX N-terminal domain, PH |
| 25 | NP_565144.1    | Regulator of chromosome condensation (RCC1) repeat, Transcription factor regulating root and shoot growth via Pin3, FYVE zinc finger, Transcription factor BRX N-terminal domain, PH |
| 26 | NP_001320309.1 | Regulator of chromosome condensation (RCC1) repeat, Transcription factor regulating root and shoot growth via Pin3, FYVE zinc finger, Transcription factor BRX N-terminal domain, PH |
| 27 | NP_176767.1    | Regulator of chromosome condensation (RCC1) repeat, Transcription factor regulating root and shoot growth via Pin3, FYVE zinc finger, Transcription factor BRX N-terminal domain     |
| 28 | NP_196834.3    | BAR domain of APPL family, Putative GTPase activating protein for Arf, Ankyrin repeats (many copies), Ankyrin repeat, PH domain, Ankyrin repeats                                     |

### **Retrieved sequences of *Arabidopsis thaliana***

>NP\_001031110.1 RING/FYVE/PHD-type zinc finger family protein [*Arabidopsis thaliana*]

MDERDREIRASHGDSNAGNVVSQSIENTREEDSGSCEGFVEESKRLEPEQQKHGKYFFYDTPLSEETGVWIPVSVPPMLE  
PDHEEWSRGLSFNGGYFPEGDMGWDQIFDEDEKELTMWDVIVDMLLAARGKASALSSGNLERCGINFLSGHLLEQAWQDM  
A

HTLTEANFGNAREILETEPPKWLPDSAASACMLCSVRFHPIIMCSRHHCRYCGGIFCRDCSKGKSLVPVKFRVSDPQQRVCD  
VCFVRLESVQPYLMDQVSPAAQLPTHDLTDLSTLRSWVNFPWQGSMEYEIYKATNTLRGYITKVGSSRTERSIPDAILRQ  
AKGLAVITVARVGVMTYKIGTGLVVARDDGSWSPPSAISSFGLGWGAQAGGEFIDFIIVLRTREAIQTFGSNTHLVVG  
AGLSAAVGVTGRAVEADIRAGSGGYAACYTYSCKGAFVGCSEGSIFTTRTSENSRFYGSQSLAASDILLGSLPRPPAA  
AALYRALGDLYQKMGR

>NP\_174273.3 RING/FYVE/PHD-type zinc finger family protein [*Arabidopsis thaliana*]

MDERDREIRASHGDSNAGNVVSQSIENTREEDSGSCEGFVEESKRLEPEQQKHGKYFFYDTPLSEETGVWIPVSVPPMLE  
PDHEEWSRGLSFNGGYFPEGDMGWDQIFDEDEKELTMWDVIVDMLLAARGKASALSSGNLERCGINFLSGHLLEQAWQDM  
A

HTLTEANFGNAREILETEPPKWLPDSAASACMLCSVRFHPIIMCSRHHCRYCGGIFCRDCSKGKSLVPVKFRVSDPQQRVCD  
VCFVRLESVQPYLMDQVSPAAQLPTHDLTDLSTLRSWVNFPWQGSMEYEIYKATNTLRGYITKVGSSRTERSIPDAILRQ  
AKGLAVITVARVGVMTYKIGTGLVVARDDGSWSPPSAISSFGLGWGAQAGGEFIDFIIVLRTREAIQTFGSNTHLVVG  
AGLSAAVGVTGRAVEADIRAGSGGYAACYTYSCKGAFVGCSEGSIFTTRTSENSRFYGSQSLAASDILLGSLPRPPAA  
AALYRALGDLYQKMGETVRSPAISPLSED

>NP\_176362.3 phosphoinositide binding protein [Arabidopsis thaliana]

MLEKIGLPPKPSLRGNSWVVDASHCQGCSSQFTFINRKHHCRRCGGLFCGTCTQQRSLRGQGDSPVRICEPCKKIEEAA  
RFELRHGYKNRAAKGGSSKRTVKNEDDVLSEILGSDVDVSSSESVSSTDNRNASKEMASSSSNKGMELDASPEELRKQAV  
EAKNKYRILKGEGKSDEALKAFKRGRELEREADALEISLRNRKRELSMRNVAETQNKAAATKESSKSQKPLRQGGKGND  
LAADLRELGWSDDEDKKPATISLEGEFSSLLREIPRSANPQKTGGIDKSQVIALKRKALTLKREGKLAELAKDELKKAKIL  
ERELEEQELLGGADGSDDLSALINSMDDDKEDDLLAQYEGSHDFDISNLVGNLDDIGVHGEYDVTDEDMEDPAIAAALK  
SLGWSEDPGHHENVHSRPSPKNRDESLAEIQTALKREALNLKRAGNVVEAMATLKKAKLLEKELEAADTSSETVDTTRAER  
DTSLKPPPRSRLAIQKELLAVKKKALTLRREGKFNEAEEELKKGAVLQNQLDELNDSSKLAATGKATREKGNLDPDISSL  
DDDGEVDVKDEELNDPNYLSMLKSLGWNDENNNPAGPSSEKSDPLNSRPGKTAEAQGA YEVRVTKPRRTKAEIQRELLGL  
KRKALTLRRQGNVDEAEVNLNQTQILEAQIMEIDSGKNLYADSDQPKKRSNDLATDSRLNGGDDSVTENDMKDPALLSTL  
KNLGWEDEEPKKEEASFGSVQSSGPRIAAKSKGQIQRELLDLKRKALAFKRQGTGDADELYSKASVLEAQLAELETPKM  
EMKGSASAIKPENYMDVDLLVGSQMEDKAIKSASVSHAPQDSYDLLGDFISPAKSGSSGVVSQPGQQQPSMMDLLTGEHS  
ERSQIHAEKGNAETMSGFRSGNNHGAEQRVAREESEPSHIQSASIQNTSPQNTLKQEILAHKKKALALKREGNISEAKKA  
LQEAKLLERRLQEGENPSPEKLGRDDMVSTTEDPPAREKENSPPSSAPKAMSGRDRFKLQQESLSHKRQAMKLRREGKMQ  
EAEAEFEIAKTLEAQLEDSTSSKPEPVDDVAVEDFLDPQLLSALKAIGLDNPVNPVSKTDTTQAAAKPNPVKESNRNT  
NNQERSQLEERIKAEKVAVTFKRAGKQAEALDALRRAKLYEKKLNALASS

>NP\_189909.1 RING/FYVE/PHD-type zinc finger family protein [Arabidopsis thaliana]

MATLNGKASPYSEENIKFKYDDYDDDDDDDDGSGSGSGGGYEDGPKWSVQSIPTKKEVEYPIIDSGDYVDDGYDSSGELS  
TTTTPIQGNEKPEVNLKNVLTGLIAIVTGRNKNPLDQKNPSSNVSFLGSGTNGDTFVHSSVYIPSAPPLLEPSGINYSV  
YKELLEAEPPPEWLPDSLASTCMQCSTPFTAITCGRHHCRFCGGIFCRNCSKGRCLMPSRFRERNPQRVCDSCYERLDPLQ  
CVLINSISNAVQVAKHDVVDWTC SRGWLNLVGLSMEDEIYKAANTLRGYCQVARLDPEKSIPHAVLSRAKGLAITVAK  
AGALLSYKLGTGLVISRRPDGWSAPSAILSVGLGWGAQIGGELMDFIIVLHDVKAVKTFCSR MHFSLGAGCSAAAGPIG  
RVLEADLRAGDKGSGVCYTYSRSKGAFVGVSLGNLVATRDMNVKIFYGDPYLSTSDILLGMVDQPKAAEPLYTALRELY  
ARLRP

>NP\_001320122.1 1-phosphatidylinositol-3-phosphate 5-kinase FAB1A [Arabidopsis thaliana]

MDSQDHKAPGFVDIVKSWIPRKSESSNMSRDFWMPDQSCPVCYECDAQFTVFNRHHCRLCGRVFCAKCAANSIPSPSDE  
TKDSHEEPERIRVCNYCYKQWEQGIVPPDNGASIISLHFSSSPARSVASTTSNSSNCTIDSTAGSPRPKMNPASRRV  
SSNMDSKSEQQNAKSRSSDHYGHVLDSSDNQVEFFVNSSGRSDGEADDDDDYQSDFAQSYAQGNDYYGAINLDEV DHI  
YGSHEAHDVGVKIEPNISGFPPDQDLDSLNTETIDKTRQQENGWNDVKEGSPPCEESFEPEVVD FESDGLLWLPPEPENE  
EDEREAVLSDDDGDEGDRGDWGYLRPSNSFNEKDFHSKDKSSGAMKNVVEGHFRALVAQLLEV DNLPMVNEGDEEGWLD  
I  
ITSLSWEAATLLKPDTSKSGGMDPGGYVKVKCIPCGRRSESMVVKGVVCKKNVAHRRMTSKIEKPRLLILGGALEYQRIS  
NQLSSFD TLLQQEMDHLKMAVAKIDSHNP DILLVEKS VSRFAQEYLLAKDISLV LNIKRSLLERISRCTGAQIVPSIDQL

TSPKLG YCDLFHVEKFVETHVSPCQVAKKMAKTLMFFDGC PKPLGCTILLKGAHEDELKKVKHVIQYGVFAAYHLAETS  
 FLADEGASIH ELPQT PITVALPDKPSMVNRSISTIPGFTVSSAEKSPTTELRGEPHKANGDLTGNFTSSKTHFQ GKLDG  
 NDRIDPSE RLLHNLDTVYCKPPETITSKDDGLVPTLESRQLSFHVEEPSVQKDQWSVLSGATEQVTDGGYTND SAVIGNQ  
 NFN RQEQMESSK GDFHPSASDHQSILVSLSTRCVWKGSVCERAHLLRIKYYGSFDKPLGRFLRDNLFDQDQCCPSCTMPA  
 EAH IHCYTHRQGS LTISVKKLPELLPGQREGKIWMWHRCLKCPRINGFP PATRIVMSDAAWGLSFGKFLELSFSNHAAA  
 SRVANCGHSLHRDCLRFYGFGRMVACFRYASINIYAVTLPPAKLYFN YENQEWLQESKEVIKKA EVLFNEVQEALSQIS  
 AKTMGAGSKGSTPNKIKLSLEELAGLLEQRKKEYKDSLQQMLNVVKD GQPTIDILLINKLRRLIIFDSYAWDECLAGAA N  
 MVRNNYLEAPKNSAPKVMGRNVSLEKLSDEKVKSIPTHV AICNDSLLQDADYETCLNQGKS FADTSGKFAIPEDVGS DRP  
 PDCRMEFDPSEGGKDNFVESSQVVKPAHTESQFQATDLSDTL DAAWIGEQTTSENGIFRPPSRAASTNGTQIPDLRLLGS  
 ESELNFKGGPTNDEHTTQVQLPSPSFYYSLNKNYSLNSRKHIMAEDRPVYVSSYRELEWRSGARLLLPLGCNDLVLPVYD  
 DEPTSIIAYALT SSEYKAQMSGSDKSRDRLDSGGSFSLFDSVNLLSLNSLSDLSVDMRSLS SAADEQVSQLLHSSLYLKD  
 LHARISFTDEGPPGKV KYSVTCYYAKEFEALRMICCPSETDFIRSLGR CRKWGAQGGKSNVFFAKSLDDRFIKQVTKTE  
 LESFIKFGPAYFKYLTESISTKSPTSLAKILGIYQVSSKHLKGGKEFKMDVLVMENLLFKRNFTRLYDLKGSTRARYNPD  
 TSGSNTVLLDQNLVEAMPTSPIFVGSKAKRLLERAVWNDTSFLASIHVMDYSLLVGVDEERNELVLGIIDFMRQYTWDKH  
 LETWVKTSGLLGPKNSTPTVISPPQQYKKRFRKAMTAYFLMVPDQWSPA AVVPSNSSSAEVKEEEEKDNPQAVGNKS  
 >NP\_001328750.1 1-phosphatidylinositol-3-phosphate 5-kinase FAB1A [Arabidopsis thaliana]  
 MDSQDHKAPGFVDIVKSWIPRKSESSNMSRDFWMPDQSCPVCYECDAQFTVFNR RHHCRLCGRVFCAKCAANSIPSPSDE  
 TKDSHEEPERIRVCNYCYKQWEQGI VPPDNGASII SLHFSSPSARSVASTTSNSSNCTIDSTAGPSRPMKNPRASRRV  
 SSNM DSEKSEQQNAKSRSSDHYGHVLDSSDNQVEFFVN RSDGEADDDDDYQSDFAQSYAQGNDYYGAINLDEV DHIYGS  
 HEAHDVG VKIEPNISGFPPDQDLDSLNTETIDKTRQQENGWNDVKEGSP PCEESFEPEVVD FESDGLLWLPPEPENEDE  
 REAVLSDDDGD EGDRGDWGYLRPSNSFNEKDFH SKDKSSGAMKNVVEGHFRALVAQLLEV DNLPMVNEGDEEGWLDIITS  
 LSWEAATLLKPDTSKSGGMDPGGYVKVKCIPCGR RSESMVVKGVVCKKNVAHRRMTSKIEKPRLLILGGALEYQRISNQL  
 SSFDTLLQQEMDHLKMAVAKIDSHNP DILLVEKSVSRFAQEYLLAKDISLV LNIKRSLLERISRCTGAQIVPSIDQLTSP  
 KLG YCDLFHVEKFVETHVSPCQVAKKMAKTLMFFDGC PKPLGCTILLKGAHEDELKKVKHVIQYGVFAAYHLAETSFLA  
 DEGASIH ELPQT PITVALPDKPSMVNRSISTIPGFTVSSAEKSPTTELRGEPHKANGDLTGNFTSSKTHFQ GKLDGNDR  
 IDPSE RLLHNLDTVYCKPPETITSKDDGLVPTLESRQLSFHVEEPSVQKDQWSVLSGATEQVTDGGYTND SAVIGNQNFN  
 RQEQMESSK GDFHPSASDHQSILVSLSTRCVWKGSVCERAHLLRIKYYGSFDKPLGRFLRDNLFDQDQCCPSCTMPAEAH  
 IHCYTHRQGS LTISVKKLPELLPGQREGKIWMWHRCLKCPRINGFP PATRIVMSDAAWGLSFGKFLELSFSNHAAA SRV  
 ANCGHSLHRDCLRFYGFGRMVACFRYASINIYAVTLPPAKLYFN YENQEWLQESKEVIKKA EVLFNEVQEALSQISAKT  
 MGAGSKGSTPNKIKLSLEELAGLLEQRKKEYKDSLQQMLNVVKD GQPTIDILLINKLRRLIIFDSYAWDECLAGAA NMVR  
 NNYLEAPKNSAPKVMGRNVSLEKLSDEKVKSIPTHV AICNDSLLQDADYETCLNQGKS FADTSGKFAIPEDVGS DRPPDC  
 RMEFDPSEGGKDNFVESSQVVKPAHTESQFQATDLSDTL DAAWIGEQTTSENGIFRPPSRAASTNGTQIPDLRLLGSESE  
 LNFKGGPTNDEHTTQVQLPSPSFYYSLNKNYSLNSRKHIMAEDRPVYVSSYRELEWRSGARLLLPLGCNDLVLPVYDDEP

TSIIAYALTSSEYKAQMSGSDKSRDRLDSGGSFSLFDSVNLLSLNSLSDLSVDMRSRLSSADEQVSQLLHSSLYLKDLHA  
RISFTDEGPPGKVYKSVTCYYAKEFEALRMICCPSETDFIRSLGRCRKWGAQGGKSNVFFAKSLDDRFFIKQVTKTELES  
FIKFGPAYFKYLTESISTKSPTSLAKILGIYQVSSKHLKGGKEFKMDVLVMENLLFKRNFTRL YDLKGSTRARYNPDTSG  
SNTVLLDQNLVEAMPTSPIFVGSKAKRLLERAVWNDTSFLASIHVMDYSLLVGVDEERNELVLGIIDFMRQYTWDKHLET  
WVKTSGLLGGPKNSTPTVISPPQQYKKRFRKAMTAYFLMVPDQWSPA AVVPSNSSSAEVKEEEEKDNPPQAVGNKS  
>NP\_001190899.1 1-phosphatidylinositol-3-phosphate 5-kinase FAB1A [Arabidopsis thaliana]  
MDSQDHKAPGFVDIVKSWIPRKSESSNMSRDFWMPDQSCPVCYECDAQFTVFNRHHCRLCGRVFCAKCAANSIPSPSDE  
TKDSHEEPERIRVCNYCYKQWEQGIVPPDNGASIISLHFSSSPSARSVASTTSNSSNCTIDSTAGPSRPKMNPRASRRV  
SSNMDSEKSEQQNAKSRSSDHYGHVLDSSDNQVEFFVNSSGRSDGEADDDDDYQSDFAQSYAQGNDYYGAINLDEV DHI  
YGSHEAHDVGVKIEPNISGFPPDQDLDSLNTETIDKTRQQENGWNDVKEGSPPCEESFEPEVDFESDGLLWLPPEPENE  
EDEREAVLSDDDGDGDRGDWGYLRPSNSFNEKDFHSDKSSGAMKNVVEGHFRALVAQLLEV DNLPMVNEGDEEGWLD  
I  
ITSLSWEAATLLKPDTSKSGGMDPGGYVKVKCIPCGRRSESMVVKG VVCKKNVAHRRMTSKIEKPRLLILGGALEYQRIS  
NQLSSFD TLLQQEMDHLKMAVAKIDSHNP DILLVEKSVSRFAQEYLLAKDISLV LNIKRSLLERISRCTGAQIVPSIDQL  
TSPKLG YCDLFHVEK FVETHVSPCQVAKKMAKTLMFFDGC PKPLGCTILLKGAHEDELKKVKHVIQYGVFAAYHLAETS  
FLADEGASIH ELPQTPTVALPDKPSMVNRSISTIPGFTVSSAEKSPTTELRGEPHKANGDLTGNFTSSKTHFQGKLDG  
NDRIDP SERLLHNLDTVYCKPPETITSKDDGLVPTLESRQLSFHVEEPSVQKDQWSVLSGATEQVTDGGYTND SAVIGNQ  
NFNREQE QMESSKGFHPSASDHQSILVSLSTRCVWKGSV CERAHLLRIKYYGSFDKPLGRFLRDNLFDQDCCP SCTMPA  
EAHIHCYTHRQGS LTISVKKLPELLPGQREGKIWMWHRCLKCPRINGFP PATRIVMSDAAWGLSFGKFLELSFSNHAAA  
SRVANCGHSLHRDCLRFYGFGRMVACFRYASINIYAVTLPPAKLYFN YENQEWLQESKEVIKKA EVLFNEVQEALSQIS  
AKTMGAGSKGSTPNKIKLSLEELAGLLEQRKKEYKQMLNVVKD GQPTIDILLINKLRRLIIFDSYAWDECLAG AANMVRN  
NYLEAPKNSAPKVMGRNVSLEKLSDEKVKSIPTHVAICNDSLLQDADYETCLNQGKS FADTSGKFAIPEDVGS DRPPDCR  
MEFDPSEGGKDNFVESSQVVKPAHTESQFQATDLSDTLDA AWIGEQTTSENGIFRPPSRAASTNGTQIPDLRLLGSESEL  
NFKGGPTNDEHTTQVQLPSPSFYYSLNKNYSLNSRKHIMAEDRPVYVSSYRELEWRSGARLLLPLGCNDLVLPVYDDEPT  
SIIAYALTSSEYKAQMSGSDKSRDRLDSGGSFSLFDSVNLLSLNSLSDLSVDMRSRLSSADEQVSQLLHSSLYLKDLHAR  
ISFTDEGPPGKVYKSVTCYYAKEFEALRMICCPSETDFIRSLGRCRKWGAQGGKSNVFFAKSLDDRFFIKQVTKTELESF  
IKFGPAYFKYLTESISTKSPTSLAKILGIYQVSSKHLKGGKEFKMDVLVMENLLFKRNFTRL YDLKGSTRARYNPDTSGS  
NTVLLDQNLVEAMPTSPIFVGSKAKRLLERAVWNDTSFLASIHVMDYSLLVGVDEERNELVLGIIDFMRQYTWDKHLETW  
VKTSGLLGGPKNSTPTVISPPQQYKKRFRKAMTAYFLMVPDQWSPA AVVPSNSSSAEVKEEEEKDNPPQAVGNKS  
>NP\_001078484.4 1-phosphatidylinositol-3-phosphate 5-kinase FAB1A [Arabidopsis thaliana]  
MDSQDHKAPGFVDIVKSWIPRKSESSNMSRDFWMPDQSCPVCYECDAQFTVFNRHHCRLCGRVFCAKCAANSIPSPSDE  
TKDSHEEPERIRVCNYCYKQWEQGIVPPDNGASIISLHFSSSPSARSVASTTSNSSNCTIDSTAGPSRPKMNPRASRRV  
SSNMDSEKSEQQNAKSRSSDHYGHVLDSSDNQVEFFVNSSGRSDGEADDDDDYQSDFAQSYAQGNDYYGAINLDEV DHIY

GSHEAHDVGVKIEPNISGFPPDQDLDSLNTETIDKTRQQENGWNDVKEGSPPCEESFEPEVVDFESDGLLWLPPEPENEE  
 DEREAVLSDDDGDGDRGDWGYLRPSNSFNEKDFHSDKSSGAMKNVVEGHFRALVAQLLEVDNLPMVNEGDEEGWLDII  
 TSLSWEAATLLKPDTSKSGGMDPGGYVKVKCIPCGRRSESMVVKGVVCKKNVAHRRMTSKIEKPRLLILGGALEYQRISN  
 QLSSFDTLQEQEMDHLKMAVAKIDSHNPDILLVEKSVSRFAQEYLLAKDISLVNLIKRSLLERISRCTGAQIVPSIDQLT  
 SPKLG YCDLFHVEK FVETHVSPCQVAKKMAKTLMFFDGC PKPLGCTILLKGAHEDELKKVKHVIQYGVFAAYHLALETSE  
 LADEGASIHPLQTPITVALPDKPSMVNRSISTIPGFTVSSAEKSPTTELRGEPHKANGDLTGNFTSSKTHFQ GKLDGN  
 DRIDPSE RLLHNLDTVYCKPPETITSKDDGLVPTLESRQLSFHVEEPSVQKDQWSVLSGATEQVTDGGYTND SAVIGNQN  
 FNRQEQMESSKGDFHPSASDHQSILVSLSTRCVWKGVCERAHLLRIKYYGSFDKPLGRFLRDNLFDDQDQCCPSCTMPAE  
 AHIHCYTHRQGS LTISVKKLPELLPGQREGKIWMWHRCLKCPRINGFP PATRRIVMSDAAWGLSFGKFLELSFSNHAAAS  
 RVANCGHSLHRDCLRFYGFGRMVACFRYASINIYAVTLPPAKLYFN YENQEWLQKESKEVIKKAEVLFNEVQEALSQISA  
 KTMGAGSKGSTPNKIKLSLEELAGLLEQRKKKEYKDSLQQMLNVVKDGOPTIDILLINKLRRLIIFDSYAWDECLAG AANM  
 VRNNYLEAPKNSAPKVMGRNVSLEKLSDEKVKSIPTHVAICNDSLQDADYETCLNQGKSFADTSGKFAIPEDVGS DRPP  
 DCRMEFDPSEGGKDNFVESSQVVKPAHTESQFQATDLSDTLDAAWIGEQTTSENGIFRPPSRAASTNGTQIPDLRLLGSE  
 SELNFKGGPTNDEHTTQVQLPSPSFYYSLNKNYSLSNRKHIMAEDRPVYVSSYRELEWRS GARLLLPLGCNDLVLPVYDD  
 EPTSIIAYALTSSEYKAQMSGSDKSRDRLDSGGSFSLFDSVNLLSLNSLSDLSVDMRSRLSSADEQVSQLLHSSLYL KDL  
 HARISFTDEGPPGKVKYSVTCYYAKEFEALRMICCPSETDFIRSLGRCRKWGAQGGKSNVFFAKSLDDRFIKQVTKTEL  
 ESFIKFGPAYFKYLTESISTKSPTSLAKILGIYQVSSKHLKGGKEFKMDVLVMENLLFKRNFTRL YDLKGSTRARYNPDT  
 SGSNTVLLDQNLVEAMPTSPIFVGSKAKRLLERAVWNDTSFLASIHVMDYSLLVGVDEERNELVLGIIDFMRQYTWDKHL  
 ETWVKTSGLLGGPKNSTPTVISPPQYKKRFRKAMTAYFLMVPDQWSPA AVVPSNSSSAEVKEEEEKDNPPQAVGNKS  
 >NP\_001328749.1 1-phosphatidylinositol-3-phosphate 5-kinase FAB1A [Arabidopsis thaliana]  
 MDSQDHKAPGFVDIVKSWIPRKSESSNMSRDFWMPDQSCPVCYECDAQFTVFNRHHCRLCGRVFCAKCAANSIPSPSDE  
 TKDSHEEPERIRVCNYCYKQWEQGIVPPDNGASIISLHFSSSPSARSVASTTSNSSNCTIDSTAGPSRPKMNPRASRRV  
 SSNMDSKSEQQNAKSRRSSDHYGHVLDSSDNQVEFFVNSSGRSDGEADDDDDYQSDFAQSYAQGNDYYGAINLDEV DHI  
 YGSHEAHDVGVKIEPNISGFPPDQDLDSLNTETIDKTRQQENGWNDVKEGSPPCEESFEPEVVDFESDGLLWLPPEPENE  
 EDEREAVLSDDDGDGDRGDWGYLRPSNSFNEKDFHSDKSSGAMKNVVEGHFRALVAQLLEVDNLPMVNEGDEEGWLD  
 I  
 ITSLSWEAATLLKPDTSKSGGMDPGGYVKVKCIPCGRRSESMVVKGVVCKKNVAHRRMTSKIEKPRLLILGGALEYQRIS  
 NQLSSFDTLQEQEMDHLKMAVAKIDSHNPDILLVEKSVSRFAQEYLLAKDISLVNLIKRSLLERISRCTGAQIVPSIDQL  
 TSPKLG YCDLFHVEK FVETHVSPCQVAKKMAKTLMFFDGC PKPLGCTILLKGAHEDELKKVKHVIQYGVFAAYHLALETSE  
 FLADEGASIHPLQTPITVALPDKPSMVNRSISTIPGFTVSSAEKSPTTELRGEPHKANGDLTGNFTSSKTHFQ GKLDG  
 NDRIDPSE RLLHNLDTVYCKPPETITSKDDGLVPTLESRQLSFHVEEPSVQKDQWSVLSGATEQVTDGGYTND SAVIGNQ  
 NFNRQEQMESSKGDFHPSASDHQSILVSLSTRCVWKGVCERAHLLRIKYYGSFDKPLGRFLRDNLFDDQDQCCPSCTMPA  
 EAHIIHCYTHRQGS LTISVKKLPELLPGQREGKIWMWHRCLKCPRINGFP PATRRIVMSDAAWGLSFGKFLELSFSNHAAA

SRVANCGHSLHRDCLRFYGFGRMVACFRYASINIYAVTLPPAKLYFNENQEWLQKESKEVIKKAEVLFNEVQEALSQIS  
AKTMGAGSKGSTPNKIKLSLEELAGLLEQRKKEYKDSLQQMLNVVKDGQPTIDILLINKLRRLIIFDSYAWDECLAGAN  
MVRNNYLEAPKNSAPKVMGRNVSLEKLSDEKVKSIPTHTVAICNDSLLQDADYETCLNQESSQVVKPAHTESQFQATDLSD  
TLDAAWIGEQTTSENGIFRPPSRAASTNGTQIPDLRLLGSESELNFKGGPTNDEHTTQVQLPSPSFYYSLNKNYSLNSRK  
HIMAEDRPVYVSSYRELEWRSGARLLLPLGCNDLVLPVYDDEPTSIIAYALTSSEYKAQMSGSDKSRDRLDSGGSFSLFD  
SVNLLSLNSLSDLSVDMRSRLSSADEQVSQQLHSSLYLKDLHARISFTDEGPPGKVKYSVTCYYAKEFEALRMICCPSET  
DFIRSLGRCRKWGAQGGKSNVFFAKSLDDRFIIKQVTKTELESFIKFGPAYFKYLTESISTKSPTSLAKILGIYQVSSKH  
LKGGKEFKMDVLVMENLLFKRNFTRLYDLKGSTRARYNPDTSGSNTVLLDQNLVEAMPTSPIFVGSKAKRLLERAVWNDT  
SFLASIHVMDYSLLVGVDEERNELVLGIIDFMRQYTWDKHLETWVKTSGLLGPKNSTPTVISPQQYKKRFRKAMTAYFL  
MVPDQWSPAADVPSNSSSAEVKEEEEKDNPAVGNKS

>NP\_564103.1 RING/FYVE/PHD zinc finger superfamily protein [Arabidopsis thaliana]

MQQGDYNSYYHHQYSQFQNPPTNPNNPNSPPAPATVAGPTDLTRNTYASAPPFTGGYGSADYSNYSQNYTPYGQNSEH  
VPPSAPSFTSPSQPPSPPATSLNPNSYSTFNQPPPPPTIHPQLSSYGSFSDSTAPYQQPTSQHMYSPYDQHQTSGYSS  
APPPSSAPAPNPNPAPYSSSLYSAPPYSSGGSSIPPSYEKPSVKFDQSGYDGYNRSRSDLGSDLYGKRSDSGEYPAFEDS  
YGDGVYAYQGGKVEPYGSRGTAPKSSNSTLFDYGRSISFSSSGRDSSVSSNSAKIVRAVPKADVQEDSTGGVQKFRVKL  
LAETYGQTTTDLVLCQIGLDGLRMLDPSTSRTLRIYPLENITRCEKLDSSILAFWSKTPVDIEAKRIRLQSNSYTTNTLLD  
TVTAAMFQAKEIGGSSRPPTSGKLIETAEKKKGLGDWMNIIKPVNEEKDHWVPDEAVSKCTSCGSDFGAFIRRHHCRC  
GDVFCDKCTQGRIALTAEDNAPQVRVCDRCMAEVSQRLSNAKETTGRNVSLQSHEDLARKLQEEMERNRKSSSGLREGSG  
RRMKEVACPTCTVHLQVQVPVSGSETIECGVCQNPFLVSAH

>NP\_001319548.1 phosphatidylinositol-4-phosphate 5-kinase family protein [Arabidopsis thaliana]

MGTRDSNNRTFSEIVGLIKSWLPWRSEPATVSRDFWMPDQSCRVCYECDCQFTLINRRHHCRHCGRVFCGKCTANSIPFA  
PSDLRTPREDWERIRVCNYCFRQWEQGDGGPHVSNITELSTSPSETSLSSKTSTTANSSSFALGSMPLIGLNQRVHHG  
SDVSLHGVSSMETSVTKQGKETSRRSSFIATDVEDPSRFALNSIRSDDEYDEYGAYQTDIETSHSPRANEYYGPMYNGM  
GIDDVPCKHLGGETADQKSLSGSPLIHQCLESIREGSEQFQKKSEHDGRDECEASSPADISDDQVVEPVDFENGLLWV  
PPEPENEEDERESALFDEEDNEGDAERGEWGYLRPSTSFSGSGEYRGEDRTTEEHKKAMKNVVDGHFRALLAQLLQVENISV  
SDEEGKESWLEIITSLSWEAANLLKPDMSKSGGMDPGGYVKVKCLASGRHDSMVVKGVVCKKNVVRMRMSTKIEKARLL  
ILGGGLEIYQRVSNQLSSFDTLQKEKDHLKMAVAKIHAERPNIILVEKSVSRFAQEYLLAKDISLVNLIKRPILLDRIARC  
TGAQIIPSDHLSSQKLGYCENFRVDRYPEEHGSTGQVGKKVVKTLMYFEHCPKPLGFTILLRGANEDELKKVKHVQYQG  
VFAAYHLALETSLADEGASPELPLNSPITVALPKDSTSIERSISTVPGFTVSTYEKSPTMLSCAEPQRANSVPVSELLS  
TTTNLSIQKDIPPIPYGSGWQAREINPSFVFSRHNLNLPDRVIESRNSDLSGRSVVPDTPADKSNPIVVADETTNNSL  
HLSGQGFVRKSSQIGTSIMVENQDNGSELTAQQQNNEKPKETQSQKEEFPPSPSDHQSLVSLSSRSVWKGTVCERSHL  
FRIKYYGSFDKPLGRFLRDHLFDQSYRCRSCEMPSEAHVHCYTHRQGSALTISVKKLQDYLLPGEKEGKIWMWHRCLRCPR  
LNGFPATLRVVMSDAAWGLSFGKFLSFSNHAASRVACCGHSLHRDCLRFYGFGRMVACFRYATIDVHSVYLPPSIL



SFNYENQDWIQRETDEVIERAELLFSEVLNAISQIAEKGFRRRIGELEEVLQKEKAEFEENMQKILHREVNNEGQPLVDIL  
 ELYRIHRQLLFQSYMWDHRLINASTLHKLENSDDTKREENEKPLAKSQTLPENAGTNSLLTGSEVNLNPDGDSTGDTG  
 SLNNVQKEADTNSDLYQEKDDGGEVSPSKTLPDTSYPLENKVDVRRRTQSDGQIVMKNLSATLDAAWIGERQTSVEIPTNN  
 KVSLLPSTMSNSSTFPPISEGLMPIDLPEQQNEFKVAYPVSPALPSKNYENSEDSVSWLSVPFLNFYRSINKNFLSSQK  
 LDTFGEHSPIYISSFREAEQGGPRLLLPVGLNDIVVPVYDDEPTSMIAAYALMSPEYQRQTSAEGESLSYPSSELNIPRP  
 VDDTIFDPSRSNGSVDESILSISSSRSTSLLDPLSYTKALHARVSYGEDGTLGKVKYTVTCYYAKRFEALRGICLPSELE  
 YIRSLRCKKWGAQGGKSNVFFAKTLDDRFIKQVTKTELESFIKFAPAYFKYLSEISSTKSPTCLAKILGIYQVATKQL  
 KSGKETKMDVLIMENLLFGRTVKRLYDLKGSSRARYNPDSGSGSNKVLLDQNLIEAMPTSPIFVGNAKAKRLLERAVWNTA  
 FLALGDVMDYSLLVGVDEEKNELVLGIIDFLRQYTWDKHLESWKFTGILGGPKNEAPTVISPKQYKRRFRKAMTTYFLM  
 VPDQWSPPNVVANNSKSDQPEETSQAGTQAE

>NP\_001328535.1 Regulator of chromosome condensation (RCC1) family protein [Arabidopsis thaliana]

MKTDGMADPSSYVNHDRDIDQALVSLKKGTTQLLKYSRKGRPKFRSFRSLPDETTLFWLSHGEEKGLKLATVSRILPGQRT  
 AVFRRYLREPKDYLSFSLIYHNGDRSLDLICKDKAETEVWFAGLKSIRQNRNKQAKSEIPEIHSDCFSTGRPSTASID  
 FAPNNTRRGRTSIDLGIQNSPTKFGSSDVGYERGNMLRPSTDGFRISVSSTPSCSTGTSGPDDIESLGDVYVWGEVWSDG  
 ISPDGVVNSTTVKIDVLIPKPLESNVVLVDVHQIACGVRHIALVTRQGEVFTWEEEAGGRLGHGIQVDVCRPKLVEFLALT  
 NIDFVACGEYHTCAVSTSGDLFTWGDGIHNVGLLGHGSDLSHWIPKRVS GPVEGLQVLSVACGTWHSALATANGKLFTFG  
 DGAFGVLGHGDRESVSYPKVKMLSGLTKLVACGVWHTVAIVEVMNQTGTSTSSRKLFTWGDGDKNRLGHGNKETYLL  
 P

TCVSSLIDYNFNQIACGHTFTVALTTSGHVFTMGGTSHGQLGSSNSDGKLPCLVQDRLVGEFVEEISCGDHHVAVLTSRS  
 EVFTWKGKSGNRLGHGDKDDRKTPTLVEALRERHVKSISCGSNFTSSICIKWVSGADQSVCSGCRQAFGFTRKRHNCYN  
 CGLVHCHACSSKKALKALAPTGPKPHRVCDACYTKLKAGESGYNSNVANRNSTTPTRSLDGTGRPDRDIRSSRILLSPK  
 TEPVKYSEVRSSRSESSIVRASQVPALQQLRDVAFPSLSAIQNAFKPVASSSTSTLPSGTRSSRISPPRSSGFSRGM  
 DTLKKSNGVINKEMTKLQSQIKNLKEKCDNQGTEIQRLKKTAREASDLAVKHSSKHKAATEVMKSVAEHLRELKEKLPE  
 VSRCEAFESMNSQAEAYLNASEASESCLPTTSLGMGQRDPTPTNTQDQNIIEKQSSNGGNMRSQEPSGTTEASSSSKGG  
 GKELIEQFEPGVYVTVLHKNGGKIFRRVRFSKRRFDEHQAEEWWNSKKDRLLKRYSHHASSSSPTASDSVPTPTQPQP  
 ASDSVPTPTQPQPASDSVPTPTQPQPASPTQPNSDQAEDSKEVLDES

>NP\_001328536.1 Regulator of chromosome condensation (RCC1) family protein [Arabidopsis thaliana]

MKTDGMADPSSYVNHDRDIDQALVSLKKGTTQLLKYSRKGRPKFRSFRSLPDETTLFWLSHGEEKGLKLATVSRILPGQRT  
 AVFRRYLREPKDYLSFSLIYHNGDRSLDLICKDKAETEVWFAGLKSIRQNRNKQAKSEIPEVSIHSDCFSTGRPSTAS  
 IDFAPNNTRRGRTSIDLGIQNSPTKFGSSDVGYERGNMLRPSTDGFRISVSSTPSCSTGTSGPDDIESLGDVYVWGEVWS  
 DGISPDGVVNSTTVKIDVLIPKPLESNVVLVDVHQIACGVRHIALVTRQGEVFTWEEEAGGRLGHGIQVDVCRPKLVEFLA  
 LTNIDFVACGEYHTCAVSTSGDLFTWGDGIHNVGLLGHGSDLSHWIPKRVS GPVEGLQVLSVACGTWHSALATANGKLFT

FGDGAFGVLGHGDRESVSYPKVKMLSGLKTLKVACGVWHTVAIVEVMNQGTGTSTSSRKLFTWGDGDKNRLGHGNKETY  
L

LPTCVSSLIDYNFNQIACGHTFTVALTTSGHVFTMGGTSHGQLGSSNSDGKLPCLVQDRLVGEFVEEISCGDHHVAVLTS  
RSEVFTWVGKGSNGRLGHGDKDDRKTPTLVEALRERHVKSISCGSNFTSSICHKWVSGADQSVCSGCRQAFGFRKRHNC  
YNCGLVHCHACSSKKALKAALAPTPGKPHRVCDACYTKLKAGESGYNSNVANRNSTTPTRSLDGTGRPDRDIRSSRILLS  
PKTEPVKYSEVRSSRSSESSIVRASQVPALQQLRDVAFPSLSAIQNAFKPVASSSTSTLPSGTRSSRISPPRSSGFSRG  
MIDTLKKSNGVINKEMTKLQSQIKNLKEKCDNQGTETIQLKKTAREASDLAVKHSSKHKAATEVMKSVAEHLRELKEKLP  
PEVSRCEAFESMNSQAEAYLNASEASESCLPTTSLGMGQRDPTSTNTQDQNIIEEKQSSNGGNMRSQEPSGTTEASSSSK  
GGGKELIEQFEPGVYVITYVLHKNGGKIFRRVRFSKRRFDEHQAEEWWNSKKDRLLKRYSHHASSSSPTASDSVPTPTQPQ  
PPASDSVPTPTQPQPPASDSVPTPTQPQPPASPTQPNSDQAEDSKEVLDES

>NP\_001154232.2 Regulator of chromosome condensation (RCC1) family protein [Arabidopsis thaliana]

MKTDGMADPSSYVNHDRDIDQALVSLKKGTLQLKYSRKGRPKFRSFRSLSPDETTLFWLSHGEEKGLKLATVSRILPGQRT  
AVFRRYL RPEKDYLSFSLIYHNGDRSLDLICKDKAETEVWFAGLKSIRQNRNKQAKSEIPEVSIHSDCFSTGRPSTAS  
IDFAPNNTRRGRTSIDLGIQNSPTKFGSSDVGYERGNMLRPSTDGFRISVSSTPSCSTGTSGPDDIESLGDVYVWGEVWS  
DGISPDGVVNSTTVKIDVLIPKPLESNVVDVHQIACGVRHIALVTRQGEVFTWEEEAAGRLGHGIQVDVCRPKLVEFLA  
LTNIDFVACGEYHTCAVSTSGDLFTWGDGIHNVGLLGHGSDLSHWIPKRVSGPVEGLQVLSVACGTWHSALATANGKLFT  
FGDGAFGVLGHGDRESVSYPKVKMLSGLKTLKVACGVWHTVAIVEVMNQGTGTSTSSRKLFTWGDGDKNRLGHGNKETY  
L

LPTCVSSLIDYNFNQIACGHTFTVALTTSGHVFTMGGTSHGQLGSSNSDGKLPCLVQDRLVGEFVEEISCGDHHVAVLTS  
RSEVFTWVGKGSNGRLGHGDKDDRKTPTLVEALRERHVKSISCGSNFTSSICHKWVSGADQSVCSGCRQAFGFRKRHNC  
YNCGLVHCHACSSKKALKAALAPTPGKPHRVCDACYTKLKAGESGYNSNVANRNSTTPTRSLDGTGRPDRDIRSSRILLS  
PKTEPVKYSEVRSSRSSESSIVRASQVPALQQLRDVAFPSLSAIQNAFKPVASSSTSTLPSGTRSSRISPPRSSGFSRG  
MIDTLKKSNGVINKEMTKLQSQIKNLKEKCDNQGTETIQLKKTAREASDLAVKHSSKHKAATEVMKSVAEHLRELKEKLP  
PEVSRCEAFESMNSQAEAYLNASEASESCLPTTSLGMGQRDPTSTNTQDQNIIEEKQSSNGGNMRSQEPSGTTEASSSSK  
GGGKELIEQFEPGVYVITYVLHKNGGKIFRRVRFSFFVANGDLSIKQKNGGIKIGCLRGIVIMLHHRVQRLLIQFQHQ  
LNLNHQLLIQFLHQLNLNHQLLIQFLHQLNLNHQLLLHNRIKQRIQKKFLMKASHHVYNSSLAK

>NP\_001328534.1 Regulator of chromosome condensation (RCC1) family protein [Arabidopsis thaliana]

MADPSSYVNHDRDIDQALVSLKKGTLQLKYSRKGRPKFRSFRSLSPDETTLFWLSHGEEKGLKLATVSRILPGQRTAVFRR  
YL RPEKDYLSFSLIYHNGDRSLDLICKDKAETEVWFAGLKSIRQNRNKQAKSEIPEIHDSDCFSTGRPSTASIDFAPNN  
TRRGRTSIDLGIQNSPTKFGSSDVGYERGNMLRPSTDGFRISVSSTPSCSTGTSGPDDIESLGDVYVWGEVWSDGISPDG  
VVNSTTVKIDVLIPKPLESNVVDVHQIACGVRHIALVTRQGEVFTWEEEAAGRLGHGIQVDVCRPKLVEFLALTNIDFV  
ACGEYHTCAVSTSGDLFTWGDGIHNVGLLGHGSDLSHWIPKRVSGPVEGLQVLSVACGTWHSALATANGKLFTFGDGAFG  
VLGHGDRESVSYPKVKMLSGLKTLKVACGVWHTVAIVEVMNQGTGTSTSSRKLFTWGDGDKNRLGHGNKETYLLPTCVSS

LIDYNFNQIACGHTFTVALTTSGHVFTMGGTSHGQLGSSNSDGKLPCLVQDRLVGEFVEEISCGDHHVAVLTSRSEVFTW  
GKGSNGRLGHGDKDDRKTPTLVEALRERHVKSISCGSNFTSSICHKWVSGADQSVCSGCRQAFGFTRKRHNHCYNCLVH  
CHACSSKKALKALAPTPGKPHRVCDACYTKLKAGESGYNSNVANRNSTTPTRSLDGTGRPDRDIRSSRILLSPKTEPVK  
YSEVRSSRSESSIVRASQVPALQQLRDVAFPSLSAIQNAFKPVASSSTLPSGTRSSRISSPPRSSGFSRGMIDTLKK  
SNGVINKEMTKLQSQIKNLKEKCDNQGTEIQRLKKTAREASDLAVKHSSKHKAATEVMKSVAEHLRELKEKLPPEVSRCE  
AFESMNSQAEAYLNASEASESCLPTTSLGMGQRDPTPTSTNTQDQNIIEKQSSNGGNMRSQEPSGTTEASSSSKGGGKELI  
EQFEPGVYVITYVLHKNNGGKIFRRVRFSKRRFDEHQAEEWWNSKKDRLLKRYSHHASSSSPTASDSVPTPTQPQPPASDSV  
PTPTQPQPPASDSVPTPTQPQPPASPTQPNSDQAEDSKEVLDES

>NP\_001327882.1 Regulator of chromosome condensation (RCC1) family with FYVE zinc finger domain-containing protein  
[Arabidopsis thaliana]

MADPASCYIYHERDVDQALVVLKKGTTQLLKYSRKGGPKFRAFRLSPDEKTLIWFSRGEEKGLKLFEVSRIVPGQRTAVFK  
RFLRPEKDHLSFSLLYNNRERSLDLICKDKAETEVWFAALKFLIEKSRNRRARSEIPEIHDSDTFSVGRQSIDFVPSNIP  
RGRTSIDLGYQNNSDVGYERGNMLRPSTDGFRISVSSTPSCSSGGSGPDDIESLGDVYVWGEVWTEGILPDGTASNETVK  
TDVLTTPRPLESNVVLDVHQIVCGVRHVALVTRQGEVFTWGEEVGGRLGHGIQVDIRPKLVEFLALTNIDFVACGEYHTC  
VVSTSGDLFSWGDGIHNVGLLGHGSDISHWIPKRVSGPLEGLQVLSVACGTWHSALATANGKLFTFGDGAFGVLGHGNRE  
SVSYYPKEVQSLNGLKTVKVACSIWHTAAIVEVMGQTATSMSSRKLFTWGDGDKNRLGHGNKETYLLPTCVSSLIDYNFHK  
IACGHTFTVALTTSGHVFTMGGTAHGQLGNSISDGKLPCLVQDRLVGEFVEEIIACGAHHVAVLTSRSEVFTWGKGANGRL  
GHGDTEDKRTPTLVEALRDRHVKSLSGCSNFTSSICHKWVSGADQSICSGCRQAFGFTRKRHNHCYNCLVHCHACSSKK  
ALKAALAPTPGKPHRVCDACYSKLKAESGYSSNVNRNVATPGRSIDGSVRTDRETTSSKVLSSANKNSVMSSSRPGFT  
PESSNARASQVPSLQQLKDIAFPSSLSAIQNAFKPVVAPTTPPRTLVI GPSSPSPPPPPRSSSPYARRPSPPRTS GF SR  
SVIDSLRKTNEVMNQEMTKLHSQVKNLKQRCNNQGTEIERFQKA AKDASELAARQSSKHKAATEALKSVAEQLKELKEKL  
PPEVSESEAFESINSQAEAYLNANKVSETSPLTTSGQE QETYQKTEEQVPSNSSITETSSSSRAPSTEASSSRISGKESK  
EQFEPGVYVITYEVD MNGNKIFRRVRFSKKRFDEHQAEDWWTKNKDRLLKCYSSNSSSSSSSSNPTASDSPVAPQPPSDPS  
VPEQSNEKEPDSET

>NP\_188968.1 Regulator of chromosome condensation (RCC1) family with FYVE zinc finger domain-containing protein  
[Arabidopsis thaliana]

MADPASCYIYHERDVDQALVVLKKGTTQLLKYSRKGGPKFRAFRLSPDEKTLIWFSRGEEKGLKLFEVSRIVPGQRTTRFLR  
PEKDHLSFSLLYNNRERSLDLICKDKAETEVWFAALKFLIEKSRNRRARSEIPEIHDSDTFSVGRQSIDFVPSNIPRGRT  
SIDLGYQNNSDVGYERGNMLRPSTDGFRISVSSTPSCSSGGSGPDDIESLGDVYVWGEVWTEGILPDGTASNETVKTDVL  
TPRPLESNVVLDVHQIVCGVRHVALVTRQGEVFTWGEEVGGRLGHGIQVDIRPKLVEFLALTNIDFVACGEYHTCVVST  
SGDLFSWGDGIHNVGLLGHGSDISHWIPKRVSGPLEGLQVLSVACGTWHSALATANGKLFTFGDGAFGVLGHGNRESVSY  
PKEVQSLNGLKTVKVACSIWHTAAIVEVMGQTATSMSSRKLFTWGDGDKNRLGHGNKETYLLPTCVSSLIDYNFHKIACG  
HTFTVALTTSGHVFTMGGTAHGQLGNSISDGKLPCLVQDRLVGEFVEEIIACGAHHVAVLTSRSEVFTWGKGANGRLGHGD

TEDKRTPTLVEALRDRHVKSLSGCSNFTSSICHHKWVSGADQSICSGCRQAFGFTRKRHNCYNCGLVHCHACSSKKALKALAPTGPVKPHRVCDACYSKLKAESGYSSNVNRNVATPGRSIDGSVRTDRETTSSKVLLSANKNSVMSSSRPGFTPESSNARASQVPSLQQLKDIAFPSSLSAIQNAFKPVVAPTTTTPPRTLVI GPSSSPPPPPRSSSPYARRPSPPRTSGFSRSVIDSLRKTNEVMNQEMTKLHSQQRCNNQGTEIERFQKAAKDA SELAARQSSKHKAATEALKSVAEQLKELKEKLPPEVSESEAFESINSQAEAYLNANKVSETSPLTTSGQE QETYQKTEEQVPSNSSITETSSSSRAPSTEASSSRISGKESKEQFEPGVYV TYEVDMNGNKIFRRVRFSKKRFDEHQAEDWWTKNKDRLLKCYSSNSSSSSSSSSNPTASDSPVAPQPPSDPSVPEQSNEKE PDSET

>NP\_001318728.1 Regulator of chromosome condensation (RCC1) family with FYVE zinc finger domain-containing protein  
[Arabidopsis thaliana]

MADLVSYGNVVRDIEQALIALKKGAQLLKYGRKGKPKFCPFRLSNDETSLIWISNGGEKRLKLATVSKIVPGQRTAVFQRYLRPKDYLSFSLIYSNRKRTLDLICKDKVEAEVWIAGLKALISGQAGRSKIDGWSDGGLSIADSRDLTLSSPTNSSVCA SRDFNIADSPYNSTNFPRTSRTENS SVSSERSHVASDSPNMLVRGTGSDAFRVS SVSSVQSSSSHGSAPDDCDALGDVYIWGEVLCENVTKFGADKNIGYLGSRSDVLIPKPLESNVVDVHHIACGVKHAALVSRQGEVFTWGEASGGRLGHGMGKDVTGPQLIESLAATSIDFVACGEFHTCAVTMTGEIYTWGDGTHNAGLLGHGTDVSHWIPKRISGPLEGLQIASVSCGPWHTALITSTGQLFTFGDGTFGVLGHGDKETVFYPREVESLSGLRTIAVACGVWHAAAIVEVIVTHSSSSVSSGKLFTWGDGDKSRLGHGDKEPRLKPTCVSALIDHTFHRVACGHSLTVGLTTS GKVYTMGSTVYGQLGNPNADGKL PCLVEDKLT KDCVEE IACGAYHVAVLTSRNEVFTWKGKANGRLGHG DVEDRKAPTLVDALKERHVKN IACGSNFTAICLHKWVSGTEQSQC SACRQAFGFTRKRHNCYNCGLVHCHSCSSKKSLKAALAPNPGKPYRVCD SCHSKLSKVSEANIDS RKNVMPRLSGENKDR LDKTEIRLAKSGIPSNIDLIKQLDNRAARQGKKADTFSLVRTSQTPLTQLKDALTNVADLRRGPPKPAVTPSSSRPVSPFSRRSSPPRSVTPIPLNVGLGFSTSI AESLKKTNELLNQEVVRLRAQAESLRHRCEVQEF EVQKSVKKVQEAMSLAAEESAKSEAAKEV IKS LTAQVKDIAALLPPGAYEAETTRTANLLNGFEQNGFHFTNANGQRQSRSDSMSDTSLASPLAMPARSMNGLWRNSQS PRNTDASMGELLSEGVRISNGFSEDGRNSRSSAASASNASQVEAEWIEQYEPGVYITLLALGDGTRDLKRVFRSRRRFRE QQAETWWSENRRERVYEKYNIRGTDRSSVATSPISQSQF

>NP\_568268.3 Regulator of chromosome condensation (RCC1) family with FYVE zinc finger domain-containing protein  
[Arabidopsis thaliana]

MSRNGRMASDLSRAGPVERDIEQAIALKKGAYLLKYGRRGKPKFCPFRLSNDETVLIWFSGNEEKHLKLSHVSRISGQRTPIFQRYPRPEKEYQSFSLIYSERSLDVICKDKDEAEVWFTGLKALISHCHQRNRRTESRSDGTPSEANSPTYTRSSPLHSPFSSNDLQKDGSNHLRIHSPFESPPKNGLDKAFSDMALYAVPPKGFYPSDSATISVHSGGSDSMHGHMRGMGMDA FRVSMSSAVSSSSHGSGHDDGDALGDVFIWGEIGEGVLGGGNRRVGSSFDIKMDSLLPKALESTIVLDVQNIACGGQHAVLVTKQGESFSWGEESEGR LGHGVD SNIQQPKLIDALNTTNIELVACGEFHSCAVTLSGDLYTWGKGDFGV LGHGNEVSHWVPKRNVNLFLEGIHVSSIACGPYHTAVVTSAGQLFTFGDGTFGVLGHGDKKS VFIPREVDSLKGLRTVRAACGVWHTAAVVEVMVGSSSSSSNCSSGKLFTWGDGDKGRLGHGNKEPKLVPTCVAALVEPNFCQVACGHSLTVALTTSGHVYTMGSPVYGG LGNSHADGKTPNRVEGKLHKS FVEE IACGAYHVAVLTSRTEVYTWGKGSNGRLGHGDVDDRNSPTLVESLKDKQVKS IAC

GTNFTAAVCIHRWASGMDQSMCSGCRQPFSSFKRKRHNCYNCGLVFCHSCTSKKSLKACMAPNPKNKPYRVCDKCFNKLKKT  
METDPSSHSSLSRRGSINQGS DPIDKDDKFDSRSDGQLARFSLMESMRQVDSRHKKNNKKYEFNSSRVSPIPSGSSQRGAL  
NIAKSFNPVFGASKKFFSASVPGSRIVSRATSPISRRPSPRSTTPTPTLSGLATPKFVVDDTKRTNDNLSQEVVKLRSQ  
VESLTRKAQLQEVELERTTKQLKEALAITNEETTRCKAAKEVIKSLTAQLKDMAERLPVGSARTVKSPPSLNSFGSSPGR  
IDPFNILNQANSQESEPNGITTPMFSNGTMTPAFGNGEATNEARNEKEWVEQDEPGVYITLTALAGGARDLKRVRFSRKR  
FSEIQAEQWWADNRGRVYEQYNVRMVDKASEDLPR

>NP\_001322526.1 Regulator of chromosome condensation (RCC1) family with FYVE zinc finger domain-containing protein  
[Arabidopsis thaliana]

MADSLRTSFSERDVEQAITSLLKKGSYLLKYGRRGKPKFCPFQLTSDDESALVWYSGKEEKQIKLSQVLRIVPGQRTPTFKR  
YPRPEKEYQSFSLICPDRSLDLICKDKDEAEVWVVGKSLITRVKVS KWKTTIKPEITSAECPTPHARRVSPFVTILDQV  
IQPSNETSTQTRLGKVFS DIVAITAPPSNNNQTEASGNLFCPFSPTPANVENS NLRFSTNDPFRSLSSAVSTSSHGSYH  
EDFDALGDVFWGESISDGVLSGTGNSLNSTTEDALLPKALESTIVLDAQNIACGKCHAVLVTKQGEIFSWGEGKGGKLG  
HGLETDAQKPKFISSVRGLGFKSLACGDFHTCAITQSGDLYSWG DGT HNVDLLGHGNESSCWIPKRVTGDLQGLYVSDVA  
CGPWHTAVVASSGQLFTFGDGTFGALGHGDRRSTSVPREVESLIGLIVTKVACGVWHTAAVVEVTNEASEAEVDSSRGQV  
FTWGDGEKQQLGHGDNDTKLLPECVISLTNENICQVACGHSLTVSRTSRGHVYTMGSTAYGQLGNPTAKGNFPERVEGDI  
VEASVEEIACGSYHVAVLTSKSEIYTWGKGLNGQLGHGNVENKREPAVVGFLREKQVKAITCGSNFTAVICVHKWVPGSE  
HSLCAGCRNPFNFRKRHNCYNCGLVFCKVCSSRKSLRAALAPDMNKPYRV CYGCFTKLKKSRESSPSTPTSRTKLLNM  
RKSTDVSE RDSL TQKFLSVNARLSSADSSLHYSERRHRRDLKPEVNNSNVFPSMNGSLQPVGSPFSKGSTALPKIPKNM  
MVKIPGSGMSSRTTSPVSVKSTSPRRSYEVA AAESKQLKDSFNQDMAGLKEQVEQLASKAHQLEEELEKTKRQLKVVTAM  
AADEAEENRSAKEVIRSLTTQLKEMAEKQSQKDSISTNSKHTDKEKSETVTQTSNQTHIRSMVSQDSQNENNLTSKSFAN  
GHRKQNDKPEKVVQDEPGVYLTLLSLPGGGTELKRVFRSRKQFTEEQAEKWWGENGAKVCERHNILVS

>NP\_177129.2 Regulator of chromosome condensation (RCC1) family with FYVE zinc finger domain-containing protein  
[Arabidopsis thaliana]

MCILELRLFAAASMADSLRTSFSERDVEQAITSLLKKGSYLLKYGRRGKPKFCPFQLTSDDESALVWYSGKEEKQIKLSQVL  
RIVPGQRTPTFKRYPRPEKEYQSFSLICPDRSLDLICKDKDEAEVWVVGKSLITRVKVS KWKTTIKPEITSAECPTPHA  
RRVSPFVTILDQVIQPSNETSTQTRLGKVFS DIVAITAPPSNNNQTEASGNLFCPFSPTPANVENS NLRFSTNDPFRSL  
SSAVSTSSHGSYHEDFDALGDVFWGESISDGVLSGTGNSLNSTTEDALLPKALESTIVLDAQNIACGKCHAVLVTKQGE  
IFSWGEGKGGKLGHGLETDAQKPKFISSVRGLGFKSLACGDFHTCAITQSGDLYSWG DGT HNVDLLGHGNESSCWIPKR  
VTGDLQGLYVSDVACGPWHTAVVASSGQLFTFGDGTFGALGHGDRRSTSVPREVESLIGLIVTKVACGVWHTAAVVEVTNE  
ASEAEVDSSRGQVFTWGDGEKQQLGHGDNDTKLLPECVISLTNENICQVACGHSLTVSRTSRGHVYTMGSTAYGQLGNPT  
AKGNFPERVEGDIVEASVEEIACGSYHVAVLTSKSEIYTWGKGLNGQLGHGNVENKREPAVVGFLREKQVKAITCGSNFT  
AVICVHKWVPGSEHSLCAGCRNPFNFRKRHNCYNCGLVFCKVCSSRKSLRAALAPDMNKPYRV CYGCFTKLKKSRESSP  
STPTSRTKLLNMRKSTDVSE RDSL TQKFLSVNARLSSADSSLHYSERRHRRDLKPEVNNSNVFPSMNGSLQPVGSPFS

KGSTALPKIPKNMMVKIPGSGMSSRTTSPVSVKSTSPRRSYEVAAAESKQLKDSFNQDMAGLKEQVEQLASKAHQLEEL  
EKTKRQLKVVTAMAADEAEENRSAKEVIRSLTTQLKEMAEKQSQKDSISTNSKHTDKEKSETVTQTSNQTHIRSMVSQDS  
QNENLTSKSFANGHRKQNDKPEKVVQDEPGVYLTLLSLPGGGTELKRVRFSRKQFTEEQA EKWWGENGAKVCERHNILV  
S

>NP\_001190338.1 Regulator of chromosome condensation (RCC1) family with FYVE zinc finger domain-containing protein  
[Arabidopsis thaliana]

MWSGFRDCTRNGRMTPSDLSRAGPVTRDIEQLKIELYSTFGVSKLDSSYILENKNALHAITALKKGAYLLKYGRRGKPKF  
CPFRLSNDESVLWFSGKEEKHLKLSHVSRIISGQRTPIFQRYPRPEKEYQSFSLIYDERSLDLICKDKDEAEVWFSGLK  
ALISRCHQRKWRTESRSDGTPSEANSPTYTRRSSPLHSPFSSNESFQKEGSNHLRLHSPYESPPKNGVDKAFSDMSLYA  
VPPKGFPPPGSATMSVHSLSSGGSDTLHGMMKGMGMDAFRVSLSSAIISSSSHGSGHDDGDTLGDVFMWGEIGEGVLGGG  
NHRVGSSLEIKMDSLLPKALESTIVLDVQNIACGGQHAVLVTKQGESFSWGESEGLRGHGVDSNVQHPKLIDALNTTNI  
ELVACGEYHSCAVTLSGDLYTWGKGDFGILGHGNEVSHWVPKRVNFLMEGIHVSSIACGPYHTAVVTSAGQLFTFGDGT  
FVGLGHGDRKSVFIPREVDLKLGLRTVRAACGVWHTAAVVEVMVGSSSSSNCSSGKLFTWGDGDKSRLGHGDKEPKLVPTC  
VAALVEPNFCQVACGHSLTVALTTSGHVYTMGSPVYQGLGNPHADGKVPTRVDGKLHKSFVEEIIACGAYHVAVLTSRTEV  
YTWGKGSGNRLGHGDADDRNSPTLVESLKDKQVKSIACGSNFTAACVCLHKWASGMDQSMCSGCRQPFNFKRKRHNCYNC  
G

LVFCHSCSNKKSLKACMAPNPKNPYRVCDRCFNKLKKAMETDPSSHSSLSRRESVNQGSDAIDRDEKLDTRSDGQLARFS  
LLEPMRQVDSRSKKNKKYEFNSSRVSPISGGSHRGS LNITKSFNPTFGSSKKFFSASVPGSRIASRATSPISRRPSPPR  
STTPTPTLSGLTTPKIVVDDTKRSNDNLSQEVVMLRSQVENLTRKAQLQEVELERTTKQLKEALAIASEESARCKAAKEV  
IKSLTAQLKDMAERLPVGSARTVKSPSLNSFGSSPDYAAPSSNTLNRPNRSRETDSDSLTTVPMFSNGTSTPVFDSGSYRQ  
QANHAAEAINRISTRSEPRNENEVVEQDEPGVYITLTALAGGARDLKRVRFSRKRFSEKQAEWWAENRGRVYEQYN  
VRIVVDKSSVGVGSED LGH

>NP\_197443.3 Regulator of chromosome condensation (RCC1) family with FYVE zinc finger domain-containing protein  
[Arabidopsis thaliana]

MSRNGRMTPSDLSRAGPVTRDIEQAITALKKGAYLLKYGRRGKPKFCPFRLSNDESVLWFSGKEEKHLKLSHVSRIISG  
QRTPIFQRYPRPEKEYQSFSLIYDERSLDLICKDKDEAEVWFSGLKALISRCHQRKWRTESRSDGTPSEANSPTYTRRS  
SPLHSPFSSNESFQKEGSNHLRLHSPYESPPKNGVDKAFSDMSLYAVPPKGFPPPGSATMSVHSLSSGGSDTLHGMMKGM  
GMDAFRVSLSSAIISSSSHGSGHDDGDTLGDVFMWGEIGEGVLGGGNHRVGSSLEIKMDSLLPKALESTIVLDVQNIACG  
GQHAVLVTKQGESFSWGESEGLRGHGVDSNVQHPKLIDALNTTNIELVACGEYHSCAVTLSGDLYTWGKGDFGILGHG  
NEVSHWVPKRVNFLMEGIHVSSIACGPYHTAVVTSAGQLFTFGDGTFGVLGHGDRKSVFIPREVDLKLGLRTVRAACGVW  
HTAAVVEVMVGSSSSSNCSSGKLFTWGDGDKSRLGHGDKEPKLVPTCVAALVEPNFCQVACGHSLTVALTTSGHVYTMGSP  
VYQGLGNPHADGKVPTRVDGKLHKSFVEEIIACGAYHVAVLTSRTEVYTWGKGSGNRLGHGDADDRNSPTLVESLKDKQV  
K

SIACGSNFTA AVCLHKWASGMDQSMCSGCRQPFNFKRKRHNCYNCGLVFCHSCSNKKSLKACMAPNPNKPYRVCDRCFNK  
LKKAMETDPSSHSSLSRRESVNQGSDAIDRDEKLDTRSDGQLARFSLLEPMRQVDSRSKKNKKYEFNSSRVSPISGGSH  
RGS LNITKSFNPTFGSSKKFFSASVPGSRIASRATSPISRRPSPPRSTTPTPTLSGLTTPKIVVDDTKRSNDNLSQEVVM  
LRSQVENLTRKAQLQEVELERTTKQLKEALAIASEESARCKAAKEVIKSLTAQLKDMAERLPVGSARTVKSPSLNSFGSS  
PDYAAPSSNTLNRPNRSRETDSDSLTTVPMFSNGTSTPVFDSGSYRQQANHA AEAINRISTRSESEPRNENEWVEQDEPG  
VYITLTALAGGARDLKRVRFSRKRKFSEKQAEWWAENRGRVYEQYNVRIVVDKSSVGVGSED LGH

>NP\_001330907.1 Regulator of chromosome condensation (RCC1) family with FYVE zinc finger domain-containing protein  
[Arabidopsis thaliana]

MSRNGRMTPSDLSRAGPVTRDIEQAITALKKGAYLLKYGRRGKPKFCPFRLSNDES VLIWFSGKEEKHLKLSHVSRIISG  
QRTPIFQRYPRPEKEYQSFS LIYDERSLDICKDKDEAEVWFSGLKALISRCHQRKWRTESRSDGTPSEANSRPTYTRRS  
SPLHSPFSSNESFQKEGSNHLRLHSPYESPPKNGVDKAFSDMSLYAVPPKGFFPPGSATMSVHSLSSGGSDTLHGMMKGM  
GMDAFRVSLSAIASSSSHGSGHDDGDTLGDVFMWGE GIGEGVLGGGNHRVGSSLEIKMDSLLPKALESTIVLDVQNIACG  
GQHAVLVTKQGESFSWGESEGR LGHGVD SNVQH PKLIDALNTTNIELVACGEYHSCAVTLSGDLYTWGKGDFGILGHGN  
EVSHWVPKRVNFLMEGIHVSSIACGPYHTAVVTSAGQLFTFGDGTFGVLGHGDRKSVFIPREVD SLKGLRTVRAACGVWH  
TAAVVEVMVGSSSSSNCSSGKLFTWGDGDKSRLGHGDKEPKLVPTCVAALVEPNFCQVACGHSLTVALTTSGHVYTMGSP  
VYGQLGNPHADGKVPTRVDGKLHKS FVEE IACGAYHVAVLTSRTEVYTWGKG SNGRLGHGDADDRNSPTLVESLKDKQV  
K

SIACGSNFTA AVCLHKWASGMDQSMCSGCRQPFNFKRKRHNCYNCGLVFCHSCSNKKSLKACMAPNPNKPYRVCDRCFNK  
LKKAMETDPSSHSSLSRRESVNQGSDAIDRDEKLDTRSDGQLARFSLLEPMRQVDSRSKKNKKYEFNSSRVSPISGGSH  
RGS LNITKSFNPTFGSSKKFFSASVPGSRIASRATSPISRRPSPPRSTTPTPTLSGLTTPKIVVDDTKRSNDNLSQEVVM  
LRSQVSCFPRFNCSLLLCI

>NP\_565144.1 Regulator of chromosome condensation (RCC1) family with FYVE zinc finger domain-containing protein  
[Arabidopsis thaliana]

MADLV TYSNADHNLEQALITLKKGTQLLKYGRKGKPKFYPPFRLSSDEKSLIWISSSGEKRLKLASVSKIVPGQRTAVFQR  
YLRPEKDYLSFSLLYNGKKKSLDLICKDKVEAEIWIGGLKTLISTGQGGRSKIDGWSGGGLSVDASRELTSSSPSSSSAS  
ASRGHSSPGTGFNIDPITSPKSAEPEVPPTDSEKSHVALDNKNMQTKVSGSDGFRVSVSSAQSSSSHGSAADDS DALGDV  
YIWGEVICDNVVKVGIDKNASYLTTRTDVLVPKPLESNIVLDVHQIACGVRHA AFVTRQGEIFTWGEESGGR LGHGIGKD  
VFHPRLVESLTATSSVDFVACGEFHTCAVTLAGELYTWGDGTHNVGLLGHS DISHWIPKRIAGSLEGLHVASVSCGPWH  
TALITSYGR LFTFGDGTFGVLGHGDKETVQYPREVESLSGLRTIAVSCGVWHTAAVVEIIVTQSNSSSVSSGKLFTWGDG  
DKNRLGHGDKDPRLKPTCVPALIDYNFHKIACGHSLTVGLTTSGQVFTMGSTVYGQLGNLQTDGKLPCLVEDKLASEFVE  
EISCGAYHVAALTSRNEVYTWGKGANGRLGHGDLED RKVPTIVEALKDRHV KYIACGSNYTAAICLHKWVSGAEQSQ CST  
CRLAFGFTRKRHNCYNCGLVHCHSCSSKKA FRAALAPSAGRLYRVCDSCYVKLSKVSEINDTNRRNSAVPRLSGENRDRL  
DKSEIRLAKFGTSNMDLIKQLDSKAAKQGKKTDTFSLGRNSQLPSLLQLKDAVQSNIGDMRRATPKLAQAPSGISSRSVS

PFSRRSSPPRSATPMPSTSGLYFPVGIADNMKKTNEILNQEIVKLRTQVDSLTKQCEFQEVELQNSVKKTQEALALAE  
SAKSRAAKEAIKSLIAQLKDVAEKLPPGESVKLACLQNGLDQNGFHFPEENGHPSRSESMTSSISSVAPFDFAFANASW  
SNLQSPKQTPRASERNNSNAYPADPRLSSSGSVISERIEPFQFQNNSDNGSSQTGVNNTNQVEAEWIEQYEPGVYITLVAL  
HDGTRDLRRVRFSSRRRFGEHQAETWWSENREKVYEKYNVRVSEKSTASQTHRDRDEEEEDIPH

>NP\_001320309.1 Regulator of chromosome condensation (RCC1) family with FYVE zinc finger domain-containing protein  
[Arabidopsis thaliana]

MDEKYLIWYSGEEERQLRLSSVITIVRGQITPNFQKQAQSDRKEQSFSLIYANGEHTLDLICKDKAQADSWFKGLRAVIT  
KHHNIRNSVNHRSRGAQSCINSPAGFMRRKQNLGLLEETPDVTQIRSLCGSPSTLLEERCLSNGLSCSSDSFAESDALG  
PVSSYYETDYDFRNSDCDRSTGSELCRFSSQRFASPPLSIITQPVTRSNVLKDIMIWGAIITGLIDGSKNQNDALSPKLL  
ESATMFDVQSSISLGAKHAALVTRQGEVFCWGNGNSGKLGLKVNIDIDHPKRVESLEDVAVRSVACSDHQTCAVTESGELY  
LWGIDGGTIEQSGSQFLTRKISDVLGGSLLTVLSVACGAWHTAIVTSSGQLFTYGSFTFGVLGHGSLESVTKPKEVESLRR  
MKVISVSCGPWHTAAIVETANDRKFYNAKSCGKLFTWGDGDKGRLGHADSKRKLVPCTVTELIDHDFIKVSCGWTLTVAL  
SISGTVYTMGSSIHGQLGCPRAKDKSNNVVLGNLTRQFVKDIASGSHHVAVLTSFGNVYTWGKGMNGQLGLGDVRDRNSP  
VLVEPLGDRLVESACGLNLTAAICLHKEISLNDQTACSSCKSAFGFTRRKHNHCYNCGLLFCNACSSKKAVNASLAPNKS  
KLSRVCDSCFDHLWSITEFSRNVKMDNHTPRMQMVTRRVSEDLTEKQSENEMQNLPQANRSSDGQPRWGQVSGPSLFRFD  
KISTSSSLNLSVSARRTSSTKISTSSSENKILTEEIERLKA VIKNLQRQCELGNEKMEECQQELDKTWEVAKEEAEKSKA  
AKEIICALASKLQANKEKPSNPLKTGIACNPSQVSPIFDDSMSIPYLTPIITARSQHETKQHVEKCVTKSSNRDSNIKLL  
VDASPAITRTGYLQNETQDSSAEQVEQYEPGVYITFTALPCGQKTLKRVRFSSRKRKFSEKEAQRWEEKQVLVYNKYDAEI

>NP\_176767.1 Regulator of chromosome condensation (RCC1) family with FYVE zinc finger domain-containing protein  
[Arabidopsis thaliana]

MGEQQISVTVPRDRTDEQAILALKKGAQLLKCRRRGNPKFCPFKLSMDEKYLIWYSGEEERQLRLSSVITIVRGQITPNF  
QKQAQSDRKEQSFSLIYANGEHTLDLICKDKAQADSWFKGLRAVITKHHNIRNSVNHRSRGAQSCINSPAGFMRRKQNL  
GLLEETPDVTQIRSLCGSPSTLLEERCLSNGLSCSSDSFAESDALGPVSSYYETDYDFRNSDCDRSTGSELCRFSSQRF  
ASPPLSIITQPVTRSNVLKDIMIWGAIITGLIDGSKNQNDALSPKLLESATMFDVQSSISLGAKHAALVTRQGEVFCWGNGN  
SGKLGLKVNIDIDHPKRVESLEDVAVRSVACSDHQTCAVTESGELYLWGIDGGTIEQSGSQFLTRKISDVLGGSLLTVLSV  
ACGAWHTAIVTSSGQLFTYGSFTFGVLGHGSLESVTKPKEVESLRRMKVISVSCGPWHTAAIVETANDRKFYNAKSCGKL  
FTWGDGDKGRLGHADSKRKLVPCTVTELIDHDFIKVSCGWTLTVALSISGTVYTMGSSIHGQLGCPRAKDKSNNVVLGNL  
TRQFVKDIASGSHHVAVLTSFGNVYTWGKGMNGQLGLGDVRDRNSPVLVEPLGDRLVESACGLNLTAAICLHKEISLND  
QTACSSCKSAFGFTRRKHNHCYNCGLLFCNACSSKKAVNASLAPNKS KLSRVCDSCFDHLWSITEFSRNVKMDNHTPRMQM  
VTRRVSEDLTEKQSENEMQNLPQANRSSDGQPRWGQVSGPSLFRFDKISTSSSLNLSVSARRTSSTKISTSSSENKILTE  
EIERLKA VIKNLQRQCELGNEKMEECQQELDKTWEVAKEEAEKSKAAKEIICALASKLQANKEKPSNPLKTGIACNPSQV  
SPIFDDSMSIPYLTPIITARSQHETKQHVEKCVTKSSNRDSNIKLLVDASPAITRTGYLQNETQDSSAEQVEQYEPGVYI  
TFTALPCGQKTLKRVRFSSRKRKFSEKEAQRWEEKQVLVYNKYDAEI



>NP\_196834.3 ARF GTPase-activating protein [Arabidopsis thaliana]

MHFTKLDDSPMFRKQLQSMEESAELRERSLKFYKGCRKYTEGLGEAYDGDIAFASALETFGGGHNDPISVAFGGPVMTK  
FTIALREIGTYKEVLRSQVEHILNDRLLQFANMDLHEVKEARKRFDKASLTQAREKFLSLRKGTKSDVAAALEQELHT  
SRSMFEQARFNLVTALSNVEAKKRFEFLEAVSGTMDAHLRYFKQGYELLHQMEPYINQVLTYAQQSRERSNYEQAALNEK  
MQEYKRQVDRESRWGSNGSNGSPNGDGIQAIGRSSHKMIDAVMQSAARGKVQTIHQGYLSKRSSNLRGDWKRFFVLDSE  
GMLYYYRKQCSKPSGSGSQLSGQRNSSELGSGLLSRWLSSNNHGHGGVHDEKSVARHTVNLLTSTIKVDADQSDLRFCFR  
IISPTKNYTLQAESALDQMDWIEKITGVIASLLSSQVPEQRLPGSPMGSGHHRSAESSYESSEYDHPTEEFVCERSF  
LGYNERPSRSFQPQRSIRKGEKPIDALRKVCGNDKCADCGAPEPDWASNLGVLVCIECSGVHRNLGVHISKVRSLTLDV  
KVWEPSVISLQALGNTFANTVWEELLHSRSAIHFDPLTVSDKSRVMVTGKPSYADMISIKEKYIQAKYAEKLFVRRSR  
DSDFPQSAAQQMWDVAVSGNDKKA VYRLIVNGDADVNYVYDQTSSSSLTLRVILVPERPKREDVLLRLRNELLDRGTSSS  
NISPEGSGGSSLLHCACEKADLGMVELLLQYGANVNASDSSGQTPLHCCLLRGKVTIARLLLTRGADPEAMNREGKTALD  
IAAESNFTDPEVLALLSDTNGYNHRQC

### **Domains Architecture of *Drosophila melanogaster***

| <i>No</i> | <i>Accession Number</i> | <i>Domains</i>                                                                                     |
|-----------|-------------------------|----------------------------------------------------------------------------------------------------|
| 1         | NP_001284784.1          | FYVE zinc finger, PH domain                                                                        |
| 2         | NP_524729.2             | Domain of unknown function (DUF3480), FYVE zinc finger, Smad anchor for receptor activation (SARA) |
| 3         | NP_001287560.1          | RUN domain, FYVE zinc finger                                                                       |
| 4         | NP_733203.1             | RUN domain, FYVE zinc finger                                                                       |
| 5         | NP_001287556.1          | FYVE zinc finger                                                                                   |

|    |                |                                                                                                                           |
|----|----------------|---------------------------------------------------------------------------------------------------------------------------|
| 6  | NP_001097943.1 | FYVE zinc finger                                                                                                          |
| 7  | NP_525099.3    | Hepatocyte growth factor-regulated tyrosine kinase substrate, VHS domain, FYVE zinc finger                                |
| 8  | NP_722831.1    | Hepatocyte growth factor-regulated tyrosine kinase substrate, FYVE zinc finger                                            |
| 9  | NP_001096997.1 | Myotubularin-like phosphatase domain, FYVE zinc finger                                                                    |
| 10 | NP_001096996.1 | Myotubularin-like phosphatase domain, FYVE zinc finger                                                                    |
| 11 | NP_608968.2    | Beige/BEACH domain, FYVE zinc finger, PH domain associated with Beige/BEACH WD domain, G-beta repeat                      |
| 12 | NP_001104451.1 | Ankyrin repeats (3 copies), FYVE zinc finger, BTB/POZ domain                                                              |
| 13 | NP_001015359.1 | Ankyrin repeats (3 copies), FYVE zinc finger, BTB/POZ domain                                                              |
| 14 | NP_001015360.1 | Ankyrin repeats (3 copies), FYVE zinc finger, BTB/POZ domain                                                              |
| 15 | NP_730882.2    | RhoGEF domain, FERM C-terminal PH-like domain, FERM N-terminal domain, FERM central domain, PH domain, FERM adjacent (FA) |
| 16 | NP_001036676.1 | RhoGEF domain, FERM C-terminal PH-like domain, FERM N-terminal domain, FERM central domain, PH domain, FERM adjacent (FA) |

|    |                |                                                                                            |
|----|----------------|--------------------------------------------------------------------------------------------|
| 17 | NP_609186.1    | FYVE zinc finger, Rabenosyn Rab binding domain                                             |
| 18 | NP_611545.1    | Rabaptin-like protein, FYVE zinc finger                                                    |
| 19 | NP_611269.1    | Phosphatidylinositol-4-phosphate 5-Kinase, TCP-1/cpn60 chaperonin family, FYVE zinc finger |
| 20 | NP_731570.2    | FYVE zinc finger                                                                           |
| 21 | NP_001188779.1 | WD domain, G-beta repeat, WD domain, G-beta repeat, FYVE zinc finger                       |
| 22 | NP_611791.2    | Myotubularin-like phosphatase domain, FYVE zinc finger                                     |
| 23 | NP_726322.1    | Myotubularin-like phosphatase domain, FYVE zinc finger                                     |
| 24 | NP_001097433.1 | Myotubularin-like phosphatase domain, FYVE zinc finger                                     |
| 25 | NP_647623.1    | Zinc finger, C3HC4 type (RING finger)                                                      |

### **Retrieved Sequences of *Drosophila melanogaster***

>NP\_001284784.1 rush hour, isoform B [*Drosophila melanogaster*]

MVDRLVNSEANTRRIASVENCFGSSGVPLAMQGRVLVGEGVLTKMCRKRPKSRQFFLFNDILVYGNIVIGKKKYNKQHIM  
 PLEEVSLESIADNQTYRNGWYIRTTTTSFVVFAATSTEKQEWMAHINKCVEDLLRKSGKKPVENHAAVWVPDTDASVCMH  
 CKKTQFTFIQRRHHCRNCGAVVCAGCSAKKFLPQQSTKALRVCDACYERLKHVPSSLGSGEDSAAATGAASGNKLNTTA

GDSSNDEDSDEETASPGGESHDPRFYGDNSVLSAVEDSSTITSPSSATTGSLEAPQVTPSVQSSPAAVATTGSHC

>NP\_524729.2 smad anchor for receptor activation [Drosophila melanogaster]

MDLVDIDQVLDNLELSIAADEQLSRNAAAAAAGANPGRFLGDGASASISGVGAGAGVSGAAGVTPTPASGKSFVGVSVQV  
FNSLDDYRENVKSLQVDAQLPYDWQTEAEHEDDIHKFSEQASKNNGQTIVSSSESLTSSCSTFSSGSPVSNNGSHSEE  
LATPPEDEKTSEVQVEPKEQDQQPEQVKHEDQHQDQAVPPPTQSKQTVEELAVGLSSISITASGTESQSLLPEEVTASSV  
LGQVLEELSEESSPSREPETEMTNGIDVPLANLPASVAEVPVPKEMECPVQTEEDVELPQEQHPRRSQPLTFCSTMDEI  
SDTELDSMLQEMDADDNQADDQQMPDDEKSCSASPVTSEESVRILSDEQETTSNDQMNVDNFSQASTVEFADLKQPESTP  
VTAMGEDVASSFSSTESDSLSGRKLDGEVEVDREHEDASLATDALETQEQRQPQRPTLNLNLCQAESSTPSQDENPEIQQ  
ETLQPTTEVREGAAGVGVIPGEDDEESPIYEAVGYSDPHANLGKVPPIWVPDNMAGQCMQCQKFTMIKRRHHCRACGKVL  
CSVCCSQRFRLEFATEPESRVCVQCYMILSERQANGLNSESAPGSALPPTPIRSPNPNNPMEYCSTIPPHRQVANSPGAP  
PPSVIVPVGVLLKKTGDSSSNSSSSDGQKGQRKRKSVMFSDGIAPGSELASTMEQQWGESKHSRRGLSRSGSGAGQKPPTP  
ATEEPPRSIDTSSTLGLVAQLFRGSIPPSAAAATLSATETSAGRSSSSQSAQTSPRRKAESSRNRKLPPNGDAQGCYLPP  
EENGLPPICISSKEGGEVDYKVVVRNDGSLDLRLQNETLKFIIKNNFFVLVKIVNMSCCMNRWVLNFTTSLHMHMGSDLI  
ILLEIKQPKQEEYVKGEVAIPKDLFQHLYEIIYVEAEHARSGTHELAFTSPRANFLGSREHGGFIFIRPTYQCLQGIVVP  
DNPYLGVVLIHRHEVPWAKVLPLRLILRLGAQYRYPCPLISVRGRESVYGEIAQTIINFLVDFRNYSYSLPAIRGLYIH  
MEDRQTTVIIPKYRQQDVIKAINNASDHILAFAGNFSKVADGHLVCMQNINDDRSEMYSYSTQAINIQGQPRKITGASFF  
VLNEALKSSSGLSGKCSIVEDGLMVQIMPAKMEEVRQALRNQNDIDIVCGPIDATDDQSEIVSIKWVDNNRDINVGKSP  
IDDQPMDGISNMRVLKWFNFYSNTNYAIRLSDIYIICKEDWYATNGGNCEEITRIAEQLARSASMLPLDLLAAAGI  
NKLGLRATLDQDNVGYEAGARGSKLPPLYMNALDNHLIATLHGESSGIQEPHILELIFYILNA

>NP\_001287560.1 uncharacterized protein Dmel\_CG31064, isoform G [Drosophila melanogaster]

MRGLVEDTKRTLSSANNNNLSSTSGSGRIKSSSLATGSSASGSSSKPLRSAVKTPTSGSATSLSSGTMAAKKAPQTGQQ  
QVGKSAKSATAATPTGTTATAIGATATTRAQAAAAKSQKGNPPSQVQPKQPPQPPQQTQQQPLVLQQQQASNSSNTIA  
LPKASHANTSEELAGGVQDTIYLCNFRVSVSDGEWLCLKELQDIDVAGGTGNQAAQTSEKLAGGSSSQTTGGFGSNYNVGSS  
SSKRNSKRFSGLSTGSGSGGNAGGGGGGLDITDNARDTAEIERSNLVNICKLVVKELLEQSLRYGRMLDSHPLQHFIV  
IEHVLGHGLRPPKGLLGPRKELWDLQSVHYCPAQDITASVRDLPTVRTHIGRARAWLRIALMQKKLSDYLQALIEHR  
EDSLFDYYEPHALMMSDEIVVIMGILVGLNVIDCNLCVKEEDLDSQQGVIDFSLYLRSSSRNADAAPEDSAPPALLDATG  
QGNMIAVLDQKNYIEELNRHLNATVGNLQAKVESLTTTNALMKEDLAIARNSLALQAENQAMRQSTSAGDNNSTGSGGS  
SDKDKEKASEELVEERRKNSELEKELKLQVSLKAESDMAMKLLKEDIHEKQDTIVSLRRQLDDIKQINLEMYRKLQDCKA  
SLTHKTELMTKLEVQKEDMASTIDQLEKKWSHDKSNLGEILKTTSQTLTTQVTASEERAARAEAESRIEREWRISLQEKE  
LKLKEKIANLQGCLKELSEEKERNGLKADLDKVRTQWSEAQTTLEELGIQLSVSKLVSEMQDQERRQRQLLSGSAQSL  
QAMPEAVGSPGIWAPDSIATHCTACEREFNLTRRKHHCRSCGEIFCKACSEHTLPLNAQGGQPGKPVVCDNCYAAK

>NP\_733203.1 uncharacterized protein Dmel\_CG31064, isoform B [Drosophila melanogaster]

MSTDDLVRRESEDSQSSSVSIPVTPTTGGAAPAPSAPTSSLDLRLNTRFRRTESISQIFSHISTQFSNAAAAAASSEV

IDGTTTYPYPDEPAPPVVPVAPDTVASASASSPSPSKLKAKRLKRARDTAEIERSNLVNICKLVVKELLEQSLRYGRMLD  
SDHLPLQHFFIVIEHVLGHGLRPPKGLGPRKELWDLQSV EHYCPEAQDITASVRDLPTVRTHIGRARAWLRIALMQKK  
LSDYLQALIEHREDSLFDYYEPHALMMSDEIVVIMGILVGLNVIDCNLCVKEEDLDSQQGVIDFSLYLRSSSRNADAPE  
DSAPPALLDATGQGNMIAVLDQKNYIEELNRHLNATVGNLQAKVESLTTNALMKEDLAIARNSLLALQAENQAMRQSTS  
AGDNNSTGSGGSSDKDEKASEELVEERRKNSELEKELKLQVSLKAESDMAMKLEKDIHEKQDTIVSLRRQLDDIKQIN  
LEMYRKLQDCKASLTHKTELMTKLEVQKEDMASTIDQLEKKWSHDKSNLGEILKTTSQTLTTQVTASEERAARAEAESRI  
EREWISLQEKELKLKEKIANLQGCKELSEEKERNGLKADLDKVRTQWSEAQTTLLEELGIQLSVSKLKVSEMQDQERR  
QRQLLSGSAQSLQAMPEAVGSPGIWAPDSIATHCTACEREFNLTRRKHHCRCSCGEIFCKACSEHTLPLLNAQGQPGKPVR  
VCDNCYAAK

>NP\_001287556.1 uncharacterized protein Dmel\_CG6051, isoform D [Drosophila melanogaster]

MDTFKRWLNKPKADDSKLLARFFHADRSALTAVASELDSFDGRAEPDRCTRLVSRLRQNQDKVLAITNLIMEELLGEDRDP  
RAFRAKFPEEVLQENLAGQLWFGAECLAAGSSIMNRETESKEMRPLAQAVTKSLGNVRVLLRDQCLKNNVPNSKTLHLDL  
NDSTTEQLYESLKIFDRLFAEFELSYVSAMVQVKS RHEYEMQQWIGVLFSETLQ RALKIGLLDQEMVDAFDPGLMFSIPR  
LAIVAGLVVYAKGPLNMDMPGDQLSEMFRPFRTILIKIRDLLRNLNQELYQLEKLLCTNEDINTKVPLGSSSIEAPSPE  
HSSHPTTSSSQNNNNSSNNNHSSSSSTNTTSTTTT TAGTTNTHRTVERLVDQRNNNHNSNSNSSTNPTVEAATLRSPSMLS  
LSATSTPTASPAPSPTPSHSIASSTSSAATSSSTNPPADWSDGDDEDEDEDDDDIDVDEEDIESSDDGTDEEQLLKDIVSADCA  
SGYLIPNTNLGNLLQPQEVPLTDNFVASEDDEYGTAEQQGHQGLEEDEPSTSAAMLAAATRTLQRLRLPSSDNEPLAEPTT  
IKASEEHMQQPSGRHRDSSHRRHHQRHHHHHHHRHPHQHQHRQPHPHRTTRSGRKRC SLEAADPERIQPDREQNLASGDT  
SAASSLSDDVSLAMRNTTARLKFN TENLLHRLFVCIAGVADQLQTNFASDLRQILRSVFLMNMSTAQEEIDIPEKTKESE  
LFEFRASENDVIQESAGSNQSIYSAEEVNPELDNVFSAGGGNQATGQRHSAGASMQRNNTIDLASQPGEGSPSGATTATS  
RSHVTRSRSLGDQEAASSATSSTAQLRQLEQQQQQQQLQIQLQRQRNNSVGSNTPSSASSTSSSSEQNSPVSARS GSRRR  
LQSNNETQMPSSATSTSATLSPPAWIPDGKAPRCMACQTPFTAFRRRHHCRCNCGGVFCGVCSNASAPLPKYGLTKAVRVC  
RDCYVREVRSGMGVQGVQSVQSVQASAS

>NP\_001097943.1 uncharacterized protein Dmel\_CG6051, isoform B [Drosophila melanogaster]

MDTFKRWLNKPKADDSKLLARFFHADRSALTAVASELDSFDGRAEPDRCTRLVSRLRQNQDKVLAITNLIMEELLGEDRDP  
RAFRAKFPEEVLQENLAGQLWFGAECLAAGSSIMNRETESKEMRPLAQAVTKSLGNVRVLLRDQCLKNNVPNSKTLHLDL  
NDSTTEQLYESLKIFDRLFAEFELSYVSAMVQVKS RHEYEMQQWIGVLFSETLQ RALKIGLLDQEMVDAFDPGLMFSIPR  
LAIVAGLVVYAKGPLNMDMPGDQLSEMFRPFRTILIKIRDLLRNLNQELYQLEKLLCTNEDINTKVPLGSSSIEAPSPE  
HSSHPTTSSSQNNNNSSNNNHSSSSSTNTTSTTTT TAGTTNTHRTVERLVDQRNNNHNSNSNSSTNPTVEAATLRSPSMLS  
LSATSTPTASPAPSPTPSHSIASSTSSAATSSSTNPPADWSDGDDEDEDEDDDDIDVDEEDIESSDDGTDEEQLLKDIVSADCA  
SGYLIPNTNLGNLLQPQEVPLTDNFVASEDDEYGTAEQQGHQGLEEDEPSTSAAMLAAATRTLQRLRLPSSDNEPLAEPTT  
IKASEEHMQQPSGRHRDSSHRRHHQRHHHHHHHRHPHQHQHRQPHPHRTTRSGRKRC SLEAADPERIQPDREQNLASGDT  
SAASSLSDDVSLAMRNTTARLKFKSTENLLHRLFVCIAGVADQLQTNFASDLRQILRSVFLMNMSTAQEEIDIPEKTKES

ELFEFRASENDVIQESAGSNQSIYSAEEVNPELDNVFSAGGGNQATGQRHSAGASMQRNNTIDLASQPGEGSPSGATTAT  
SRSHVTRSRLGDQEAASSATSSTAQLRQLEQQQQQQQLQIQLQRQRNNSVGSNTPSSASSTSSSSEQNSPVARSRSR  
RLQSNNETQMPSSATSTSATLSPPAWIPDGKAPRCMACQTPFTAFRRRHHCRNCGGVFCGVCSNASAPLPKYGLTKAVRV  
CRDCYVREVRSGMGVQGVQSVQSVQASAS

>NP\_525099.3 hepatocyte growth factor regulated tyrosine kinase substrate, isoform B [Drosophila melanogaster]

MFRSSFKNLENATSHLRLEPDWPSILLICDEINQKDVTPKNAFAAIAKKKMNSPNPHSSCYSLLVLESIVKNCGAPVHEE  
VFTKENCEMFSSFLESTPHENVQRQKMLELVQTWAYAFRSSDKYQAIKDTMTILKAKGHTFPELREADAMFTADTAPNWAD  
GRVCHRCRVEFTFTNRKHHCRNCGQVFCGQCTAKQCPLPKYGIEKEVRVCDGCFAALQRPTSGSGGAKSGPRPADSELPA  
EYLNSTLAQQVQTPARKTEQELKEEEEELQLALALSQSEAEQQKPKLQSLPPAAYRMQQRSPSEAPPEPKEYHQPEEAT  
NPELAKYLNRSYWEQRKISESSSMASPSAPSPMPPTPQQQIMPLQVKSADDEVQIDEFAANMRTQVEIFVNRMKSNSSRG  
RSISNDSSVQTLFMTLTSLSHQQLSYIKEMDDKRMWYEQQLQDKLTQIKDSRAALDQLRQEHVEKLRRIAEEQERQRQMOM  
AQKLDIMRKKKQEYLQYQRQLALQRIQEQUEREMQLRQEQQKAQYLMGQSAPFPYMPPSAVPQHGSPPSHQLNNVYNPYAA  
GVPGYLPQGPAPAPNGHGQFQAIPPGMYNPAIQQPMPPNLQPGGLMQQPAPPGNPQMMPPMPENQFANNPAAILQLPQQH  
SIAQPPQIPFQPQPQQIPGQQPQQIPGQQPQQIPGQQPQQIPGQQPQQIPVQQPQPQPMGHVMLQQHQAPPAAQAPPVT  
EIANNVQAVAAAPAPPQNEPGPAPVKAEEPATAELISFD

>NP\_722831.1 hepatocyte growth factor regulated tyrosine kinase substrate, isoform A [Drosophila melanogaster]

MSSEEELSIEEESLDTMTILKAKGHTFPELREADAMFTADTAPNWADGRVCHRCRVEFTFTNRKHHCRNCGQVFCGQCTA  
KQCPLPKYGIEKEVRVCDGCFAALQRPTSGSGGAKSGPRPADSELPAEYLNSTLAQQVQTPARKTEQELKEEEEELQLALA  
LSQSEAEQQKPKLQSLPPAAYRMQQRSPSEAPPEPKEYHQPEEATNPELAKYLNRSYWEQRKISESSSMASPSAPSPM  
PPTPQQQIMPLQVKSADDEVQIDEFAANMRTQVEIFVNRMKSNSSRGRSISNDSSVQTLFMTLTSLSHQQLSYIKEMDDK  
RMWYEQQLQDKLTQIKDSRAALDQLRQEHVEKLRRIAEEQERQRQMMAQKLDIMRKKKQEYLQYQRQLALQRIQEQUERE  
M

QLRQEQQKAQYLMGQSAPFPYMPPSAVPQHGSPPSHQLNNVYNPYAAGVPGYLPQGPAPAPNGHGQFQAIPPGMYNPAIQ  
QPMPPNLQPGGLMQQPAPPGNPQMMPPMPENQFANNPAAILQLPQQHSIAQPPQIPFQPQPQQIPGQQPQQIPGQQPQQI  
PGQQPQQIPGQQPQQIPVQQPQPQPMGHVMLQQHQAPPAAQAPPVTEIANNVQAVAAAPAPPQNEPGPAPVKAEEPAT  
AELISFD

>NP\_001096997.1 uncharacterized protein Dmel\_CG3632, isoform F [Drosophila melanogaster]

MSDGSPPPSICFIRAAESYPKSQMEKEDSQLFVPFQELAGESIKYLGRTDDGILALSNYRIFLSKQSTGYETYVPLGLIE  
SVQVRDLFQLIVNCKDASTVRCSEFSAEQCSDWQRRHLMIGVPESLETLFAPPFYSWTCDVLGSGNGSGIVSAQANGNG  
LIAKDRCLTLHNGLAKPTANVTASNPLPDPASETISAAMSNRLQRSVRYESDFKNEVARLGFDLKGSWRISTANADFKLC  
PSYPPKLLVPCCITDEMLHNVANFRGSRRLPAVVWRHQKSGAILARCSQPEVGWLGWNRNTRDEQLLKALADACAFDRGEH  
ARHSTCANAKAQPTKGSKETNGQSGLSGKSSPSLDDSSHEELTLDEIKKILIVDARSYTSAVTNRARGGGCECIEYYPCA  
EIEFMNLGNIHAIRKSFHAVRQLCASSPDDPNWYGQLEKTMWMQHLSGLLGATMTVVHTIEKNRPVLVHCSDGWDRTPO

IVATAQLCLDPYYRTVEGFRVLVEREWLNFGHKFADRSNGNPNSDEVNERCPVFLQWLDLVHQIHRQYPCSFESISYLI  
KLAQHSLSCFLGTFLCNSLRERIENSVFDRFTSVWPFLAETMYRNPLYKHETEKVLWPAHSVRFLYFWSDVYLGSLGNKN  
GTDLPLLSNERQSGHNGLMAKTRSSDLTTNELGQSTISRRSSDPNLTVESIVTDCFNANSNSMFDIRSEANNSVSENVQ  
ESVKDSKEVELDVTDATEDVGPCGRSNNPIPDFHNDQSTASKRDILEVESQTQRRSSLESSQLIPGSVFIFGSSSENDKNAV  
PSESEESLATSQKLNSESGRPFFIFGSSSENDQSPVPLKSEDTSDISRALWHGAIETSTDTLIPAEPVQKPNSDNSSRDHI  
TSPTMELVSGDRKLESTSTVQASKISQSYNNLPKVHIRPNAVICPQRVDAFPHHLDLQVPRETTGNPDRCKPEKLAKDAN  
ANANANGSLLASDGYNGEESLFISPDQLRFVVGQSPFDAPSTGGIRIRNTFGSSYSRDMKFTAENGSAHQFPSSGIISLPP  
TPFQERAQFTISCPDGLAHGLSEQNIRLHQIVQEHLREEMLLREIHGMRLALLEKGCPSCNSIVSTNMEHENGSDIVEN  
ASTCSWEAVEERSGPASYAPSSIQEKKASSVLWVPDHAVSRCSSCQTEFWLGRRKHHCRSCGEIFCADCSEFWAPLPNEK  
LFNPVRLCGSCYTSVTTNVQEYAAVPAESQAKDDETSSAIS

>NP\_001096996.1 uncharacterized protein Dmel\_CG3632, isoform E [Drosophila melanogaster]

MDFMVPPIHTMSDGSPPPSICFIRAAESYPKSMKEKEDSQLFVPFQELAGESIKYLGRTDDGILALSNYRIFLSKQSTGYE  
TYVPLGLIESVQVRDLFQLIVNCKDASTVRCSFPSAEQCSDWQRRIHLMIGVPESLETLFAPPFYSWTCDVLGSGNGSGI  
VSAQANGNGLIAKDRCLTLHNGLAKPTANVTASNPLPDPASETISAAMSNRLQRSVRYESDFKNEVARLGFDLKGSWRIS  
TANADFKLCPSYPPKLLVPCCITDEMLHNVANFRGSRRLPAVVWRHQKSGAILARCSQPEVGWLGWRNTRDEQLLKALAD  
ACAFDRGEHARHSTCANAKAQPTKGSKETNGQSGLSGKSSPSLDDSSHEELTLDEIKKILIVDARSYTSVAVTNRARGGGC  
ECIEYYPCAEIEFMNLGNIAIRKSFHAVRQLCASSPDDPNWYGQLEKTMWMQHLSGLLGATMTVVHTIEKNRGPVLVHC  
SDGWDRTPQIVATAQLCLDPYYRTVEGFRVLVEREWLNFGHKFADRSNGNPNSDEVNERCPVFLQWLDLVHQIHRQYPCS  
FEFSISYLIKLAQHSLSCFLGTFLCNSLRERIENSVFDRFTSVWPFLAETMYRNPLYKHETEKVLWPAHSVRFLYFWSDV  
YLGSLGNKNGTDLPLLSNERQSGHNGLMAKTRSSDLTTNELGQSTISRRSSDPNLTVESIVTDCFNANSNSMFDIRSEA  
NNSVSENVQESVKDSKEVELDVTDATEDVGPCGRSNNPIPDFHNDQSTASKRDILEVESQTQRRSSLESSQLIPGSVFIFG  
SSSENDKNAVSESEESLATSQKLNSESGRPFFIFGSSSENDQSPVPLKSEDTSDISRALWHGAIETSTDTLIPAEPVQKPN  
SDNSSRDHITSPTMELVSGDRKLESTSTVQASKISQSYNNLPKVHIRPNAVICPQRVDAFPHHLDLQVPRETTGNPDRCK  
PEKLAKDANANANANGSLLASDGYNGEESLFISPDQLRFVVGQSPFDAPSTGGIRIRNTFGSSYSRDMKFTAENGSAHQFP  
SSGIISLPPTPFQERAQFTISCPDGLAHGLSEQNIRLHQIVQEHLREEMLLREIHGMRLALLEKGCPSCNSIVSTNMEH  
ENGSDIVENASTCSWEAVEERSGPASYAPSSIQEKKASSVLWVPDHAVSRCSSCQTEFWLGRRKHHCRSCGEIFCADCSE  
FWAPLPNEKLFNPVRLCGSCYTSVTTNVQEYAAVPAESQAKDDETSSAIS

>NP\_608968.2 blue cheese [Drosophila melanogaster]

MNVMRKLGAASAGSVSGSSSGTSTANNSSPGSSRTDAGAPTAANGRNAEEALMDARVQVSLTTLKKLFNEYTHPREPLS  
EQERDDKLYEMLPLFCKVFSSCPSNDMSEKFWDVVAFCCQQVSRLMVSEIRKRASNQSTEAASIAIVKFLEVETTEETSSG  
WMLLATLNL LANGDVSLIQVMTAAAVPSTLVKCLYLFFDLPIVEDDEPSADGGAVSEFNAHERRTLQKVVFVQLLVKLCS  
YPYPAEELARMDDLTLFSAITSPCIHNIVWRKNAAEILTTISRNGLTDAVVSYIHSKGCMAVCVDNMQRLLTFGNPLEI  
VEMFVTVFCFLKDSSQVSQILMDDFRASQGYVFLSDFLKFDNNRSQSLEIQAAIRNLVLMISSLCMCGFYELRPPASQF

NTAFKLQNFQLPQATSRETCVRNVYAFQVLQNVFLKSTTPALCCTILDAISRVYHSEANANYFILESEQTLSSFAERIHMK  
SPQIQEKFYDLLEFIVFQLNFPCKELISLSLLLKHQNSTSCSILCLKTLLNLRHNAVFKDVYREVGILEIFVGCLTRY  
AAHVQKITKGDES VVVELENESEEEELFDTLGKHVLEALTMLLGGGASNNAQLFREYGGAKCVHEL VKFKHCRPQALGIVR  
ELILSAGGDDMLHILSLMHSVSPLQVEFKIQILNMLLGCLKDSHRTRTVFRKVGGFVYVTSV FVSLDGSMA LPQPDPQ  
QDLILLQIVFQTLATAMRFEPANAKFFHQEISSSSLCDTLRLGCFGSSALQDYTGTYEPQQSLLKYYHEIFSGDILS  
VSFSEDVPYPLSYVCIVFRLLYSIALDNFEAPNLSGIITLFSDPPTTLRSPSKELAPPVHPSQLNLTQPSPEPRIVHPGV  
VLCMLQLLPAVEYDMAPLQAVQLQVYLSEIISKSLVRSERNNQIMCDHGLAEKLLKLTRRALAEESHPLHVPMQYILERLA  
AQALQPTELRQFLRLGEPLSCADIDLQQPYKLGGPVPLTRIKTLVSMTPRDFRAHGSSTLPPFVELDMSAEGFGCLYLP  
SLAPQATATAGGTIDANSIGGIGAGDRIFPPQTGLTYSTWFCVEKFSDPKTDPHCVRLLTLVRTIHNPREENLACLSILL  
SARDKAIVVSTQETLVTPRKSIGDWEPEGSDDGIARIWCPDLLHEGQWHNLVVVLNRAVLKNSSLFLYLDGVPMTQKLH  
YIAQHPAAGNASLTSPTQIFGYIGTPPIWRRYSRLCWKQGVCHLIEDVLTQQTVQTIYQLGPHYMGSLQAPQLGKQSESL  
APLVPEDRVLLGLNAKAVSKLTLVKIRKVYSRADNKSIAKQLNMNSHENATPIKILHNSAGHLAGAGRSLGGVVVGYLGV  
RVFSPHPVSAMIDTVGGCNVLLGIIAMAQDVESLYAGVKALTCVVRSNRAAQAEMDRKRCYQTLGMFFKKKKHLLNSHIL  
HLTFGLVGTVNSGQDMSAIPNVTAQDLLCDLEIWHNAPNGLLRSLLEHLLLVVESSDKKQNVKIMRDLQLLVKLLHII  
TQIQDHSTREILFSLLETLLGGQPRHTDLLLFGQYVAAKLPHAHSGGLERAVLLPSMKNPAEDQDGGVAQNIYLRNRCLS  
LLHGLLFTPRNTVNYVICDDISKTLGMDWLLLFMQPHVHFTTVIIAVRILVVICANESFLVRFRDATHNGGYLRFTMV  
QRKMLGLGAQQLNQRPTNGTGTVIVATPQNTIQHLPTQIAGEVRAAALNIPGFQLEWLMNHHLDVPELYFLITALIMGQ  
PVKVLATEHTKFDLDRVWSFLWGAPVSANTQLPKLNICPEGVCVLLAMVRGIVHGGECAPWLHSHPETIQLLFSLYQNL  
TDFAPVMMTG DVVTSLVAVLFPLASRPADSEPNSGASTPTDDTGSSFALPPPETLHGAPQPKLTAHPVCNCIIDFLRVIV  
VDSLGLNMQGKPTVIDLVLDAAPESAELPLQVQYQTQIIALMDHLLAADVLVGEQAALPLVPLLQSQM QYIAPNVFYL  
TARIVDKLWQGCLARNPHDIFDFVIKLVQAKRRSSSLSEHLHHS LNRSILFLLSRPTDDSRADQMSVLEALHKIIQHR  
LLIFGAGNHELEFIGCLTYCLLQLTADMKIILEPATSRNTTWHVNPQTETAEPKDEDLNQLQGRNLIVGAAFRVWEELYV  
CKKPAIEEVFKVSLTSPPPNSKAPDLQTTREQVMELASKLWFNYVEAERKATYRAPWELHTQIQSKIQKVTGGLSRLTSR  
TKTKKEELVRTRSTLTREAA YESTGIHVQLIKDLLDLRAKQYQQMLQHTQRYVYQDWVQSEMELTRERGLWGPTGSCSLD  
KWILDTTEGPHRMRKKTM RNDVFYLHYPYRPELELADNRQLKYKVASSLDSKTYALHGPPQPRILAEAGEHHAMQQQSSL  
EAVQSHRLETSSSTSTPPPMVLPKL VGHGSTPCPQESVDGNAPEDDEEEEDTSMTSDNETFLRLLEEQEKISFMFRCARV  
QGLDTFEGLLLFGKEHCYIVDGFTLLKNREIRDIDTLPPGAYEPIIPNSGGTSSTTSRAVSHKLRQCSKFAYEEIREVHK  
RRYLLQPIALEVFSEDGRNYLLSFPRKVRNKVNQRFLALATALNDNAQQSVAGQKRTASVEQTAGIFSGLIGETSVTQRW  
VRGEISNFQYLMHLNTLAGRSYNDLMQYPVFPWILADYDSEELDLTNPKTFRDFSRPMGAQAEERLEQFQKRKFKEWDDPH  
GETPPYHYGTHYSSAMIVCSYLVRLEPFSQPFLKLQGGHFDLADRMFHSIKEAWLSASKLNMADV KELIPEFFYLPEFLS  
NFNNFDLGTKQNGETLNHVILPPWAKHDPREFIRLHRSALCEDYVSQHLHLWIDLIFGCKQQGPAAVD AVNVFHHLFYEG  
NVDIYNIDDP LKK NATIGFINNFGQIPKQLFKKAHPAKKMGGSRHSALIDPTSLIQGNSTVLQTDRLFFHNLDNLKPSLQ  
PIKELKGPVGQILQPDKTVFAVEQNKVMMPPSYTKYIAWGFADHSLRIGLYDTRASFVSEASAQNSGEILTCACPNAKM



IVTAGTSSVVTIWKFDANRKSLAVKHSLSHGHTDAVTCLAASAAYNVIVSGSRDGTAIWDMTRFTFVRQLRGHAGVVAAV  
SINELTGDIATCSATWLHVWSINGDALAMVNTCVGSADRMQQILCVAFSQIREWDQQNVIITGSTDGVVRMWSLEHTQVP  
IDRKLKRGTEVSSQDKPDTVSLEGKDNKDDKMSLMKQIKSLSQSEEEMEIVKSASESSISEASQHSHGSSKSAEAGPKAE  
VQGERRKSSISGAKSLHEMKSATVEGQGSSYDPKSNEDHAIRPSKSDTSLTDGFVVIDNDRHKGDQILRKGRWQRQLM  
FRSKLTMHTAYDRKDNAEPASITALTVSKDHKILYVGDARGRIFSWSVTEQPGRGVADHWLKDEGADQCVKCHVKFTLYE  
RKHHCRNCGQVFCNKCSRFESEISRLRILKPVVVCQACYSQLRTNSLDN

>NP\_001104451.1 uncharacterized protein Dmel\_CG41099, isoform D [Drosophila melanogaster]

MGSNETFSVLKMEKILAVQSDEYTKLQRCYVELQRKYENIENIASSENEESGLSSFLSRLSLTVASLFDKNTYADIIYIRSQT  
RVFPAHKIVLHARSEKWGNDLLSNIQQLDWSLDNEDVVLSELLRWIYTDLIDLQNDGLALDLLKAAHRFGLPSLLGICERA  
LVTSGVVRSCIRFYCVAAEEVGASTLLEYCSSIISTHWDDLTTDDFQHMMSGPLLFEMLKTKTKHPLHAAVRLLREDVVSLC  
IQKYGNLSLVNTFSENGILPLEMALSSKNAKIAKSLVDNGMANINAVNMEGFSLLKSALKNGDAFSANFLLDQNCLLDLPS  
KPSSDTALHIICNYGPDNTPEIMEVVKKILQRQLNINIQNIKGETPLHIAIARRNVEMVKLLLKVPNIDINLRTYDEKCA  
LELSLSMGDHEFLIASILLSMGARTDRTNSKTGDSLLQVFALDRHRGEKSAIFLADFADLDHINFRGLTALHIAALNNMP  
NLVKKLIVNGASSNLKHIDCGLKSALHIAVEANAIDALEAFVELKNKSHDIDFNCQDINGDSPLSLCLSLKRTTLVPTLI  
RGGSDVNGKNKNNLSPLHQSIKNEDSDISLFLLEQGADITALTENLDSALDLSIKHDLSEVVDALCRRGIALSINKNGES  
PLWSALEKGYEDVAKILVRHGIDTDCWDEGPEGCRQTLLHRAIDENKESVAIFLIQSQCGLDSSRQPGPNGEDEA QDK  
ASPLHLCCHWGQTKVLQTLIDHGANVNLIDAESKSPLHVAIESQYDEIISILLCHPDIDLKLRDKSGNTPFATALDFRNH  
NAAQRILDRFPTAAEQMDIRGRNFLHLAILKDDLESVLFLLAIQVDVNSRVHDANQSSPLHLAAASQNEMITRNILAGA  
RMNERDAVQKLPLHIAIERGNLPAVSALIQQNADYDATDADGNNALHIAVRCAQFFIVRELLTESRVNAEATNLKGRNPL  
HELRCRVVEDSTAGLICELFLESMPKYPINIPDMDGNTPLLLSFMRGQSPCKILVKAGACLG TENKDGINIFNFKLATDQ  
LLHNLLDQLPQESPWAESDYCQHCTNRFTITMRKHHCRHCGRVLC SKKSCNDVPILKFGINKPVRVCTVCFNVLQCGNGS  
LS

>NP\_001015359.1 uncharacterized protein Dmel\_CG41099, isoform C [Drosophila melanogaster]

MKTGSNETFSVLKMEKILAVQSDEYTKLQRCYVELQRKYENIENIASSENEESGLSSFLSRLSLTVASLFDKNTYADIIYIRS  
QTRVFP AHKIVLHARSEKWGNDLLSNIQQLDWSLDNEDVVLSELLRWIYTDLIDLQNDGLALDLLKAAHRFGLPSLLGICE  
RALVTSGVVRSCIRFYCVAAEEVGASTLLEYCSSIISTHWDDLTTDDFQHMMSGPLLFEMLKTKTKHPLHAAVRLLREDVVS  
LCIQKYGNLSLVNTFSENGILPLEMALSSKNAKIAKSLVDNGMANINAVNMEGFSLLKSALKNGDAFSANFLLDQNCLLDL  
PSKPSSDTALHIICNYGPDNTPEIMEVVKKILQRQLNINIQNIKGETPLHIAIARRNVEMVKLLLKVPNIDINLRTYDEK  
CALELSLSMGDHEFLIASILLSMGARTDRTNSKTGDSLLQVFALDRHRGEKSAIFLADFADLDHINFRGLTALHIAALNN  
MPNLVKKLIVNGASSNLKHIDCGLKSALHIAVEANAIDALEAFVELKNKSHDIDFNCQDINGDSPLSLCLSLKRTTLVPT  
LIRGGSDVNGKNKNNLSPLHQSIKNEDSDISLFLLEQGADITALTENLDSALDLSIKHDLSEVVDALCRRGIALSINKNG  
ESPLWSALEKGYEDVAKILVRHGIDTDCWDEGPEGCRQTLLHRAIDENKESVAIFLIQSQCGLDSSRQPGPNGEDEA Q  
DKASPLHLCCHWGQTKVLQTLIDHGANVNLIDAESKSPLHVAIESQYDEIISILLCHPDIDLKLRDKSGNTPFATALDFR

NHNAAQRILDRFPTAAEQMDIRGRNFLHLAILKDDLESVLFLLAIQVDVNSRVHDANQSSPLHLAAASQNEMITRNLILA  
GARMNERDAVQKLPLHIAIERGNLPAVSALIQQNADYDATDADGNNALHIAVRCAQFFIVRELLTESRVNAEATNLKGRN  
PLHELRCRVVEDSTAGLICELFLESMPKYPINIPDMDGNTPLLLSFMRGQSPLCKILVKAGACLG TENKDGINIFNFKLAT  
DQLLHNLLDQLPQESPWAESDYCQHCTNRFTITMRKHHCRHCGRVLCSCSCNDVPILKFGINKPVRVCTVCFNVLQCGN  
GSL

>NP\_001015360.1 uncharacterized protein Dmel\_CG41099, isoform B [Drosophila melanogaster]

MEKILAVQSDEYTKLQRCYVELQRKYNENIASSENEESGLSSFLSRLSLTVASLFDKNTYADIIYRSQTRVFP AHKIVLH  
ARSEKWGNDLLSNIQQLDWSLDNEDVVL SLLRWIYTDLIDLQNDGLALDLLKAAHRFGLPSLLGICERALVTSVGVRSCI  
RFYCVAEEVGASTLLEYCSSIISTHWDDLTTDDFQHMSGPLLFEMLKTKTKHPLHAAVRLREDVVS LCIQKYGNSLVNT  
FSENGILPLEMALSSKNAKIAKSLVDNGMANINAVNMEGFSLLKSALKNGDAFSANFLLDQNCLLDLP SKPSSDTALHII  
CNYGPDNTPEIMEVVKKILQRQLNINI QNIKGETPLHIAIARRNVEMVKLLLKVPNIDINLRTYDEKCALELSLSMGDHE  
FLIASILLSMGARTDRTNSKTGDSLLQVFALDRHRGEKSAIFLADFADLDHINFRGLTALHIAALNNMPNLVKKLIVNGA  
SSNLKHIDCGLKSALHIAVEANAIDALEAFVELKNKSHDIDFNCQDINGDSPLSLCLSLKRTTLVPTLIRGGSDVNGKNK  
NNLSPLHQSIKNEDSDISLFLLEQGADITALTENLDSALDLSIKHDLSEVVDALCRRGIALSINKNGESPLWSALEKGYE  
DVAKILVRHGIDTDCWDEGPEGCRQTLLHRAIDENKESVAIFLIQSQCCLDSSRQPGPNGEGGDEA QDKASPLHLCCHWG  
QTKVLQTLIDHGANVNLIDAESKSPLHVAIESQYDEIISILLCHPDIDLKLRDKSGNTPFATALDFRNHNAAQRILDRFP  
TAAEQMDIRGRNFLHLAILKDDLESVLFLLAIQVDVNSRVHDANQSSPLHLAAASQNEMITRNLILAGARMNERDAVQKL  
PLHIAIERGNLPAVSALIQQNADYDATDADGNNALHIAVRCAQFFIVRELLTESRVNAEATNLKGRNPLHELRCRVVEDST  
AGLICELFLESMPKYPINIPDMDGNTPLLLSFMRGQSPLCKILVKAGACLG TENKDGINIFNFKLATDQLLHNLLDQLPQ  
ESPWAESDYCQHCTNRFTITMRKHHCRHCGRVLCSCSCNDVPILKFGINKPVRVCTVCFNVLQCGNGSL

>NP\_730882.2 Chondrocyte-derived ezrin-like domain containing protein, isoform F [Drosophila melanogaster]

MSLADMGTASRSAGGEGGRHYDLATGGAGSGGHPVGGGLPGGRMTHSLSTPSGVDGTPSTPRHRGGKKLTVRIQMLDDSI  
TMFQVQAKALGRVLFEQVCRQLNLLEADYFGLEYQEVSTHTKYWLDLEKPMNRQVGLSLIDPVLRFCKIFYTPDPAQLEE  
EYTRYLFC LQIKRDLATGSLQCNDNTAALMASYIVQASCGDFVPEDYPDHTYLSSYRFV PNQDATMQRKIMENHKKHV GQ  
SPA EADLN LLETARRCELYGMKMHPAKDVEGVPLNLAVAHMGITVFQ NITRINTFSWAKIRKISFKRKRFLVKLHPEGYD  
TVEFFFEGRNECKNFWKKCVENHGFFRCTAVQNTPRRKTRVLSRGSSFRYSGKTQKQIIEFVRENYVKRQNFQRSQSFRQ  
GPLNASSRSQSHTYVNSSISANPLLPIDTAAWDYRNQCSDSMTPSLTKKAADTLDRRRDNPIGHMRSQVTAAQVEIYQTK  
NYAADSPTSQEEAECSAAGAERQHHS AVAMDKLNSNRSLSPQGPQSWTSPSHSSHQQRGPD PARVHPGDHNTDGY YGIN  
GNMSLDRRGEITTPTRYDLTLGSDKSSSLSRSEAGTYDVIQAEIQHAKRQELATGVATASHQNGNGNGNGHTLSTQHDI  
EAEVKKRKWPTEPSYFLAKELMTERTYKKDLVDLNTTFRQVLSLGDVEQLQPLFELLD SLAQHHNLF LRDIHRMVQWE  
GRGGHEAHRIGDVMMKHMAALPIYDEYVQTHLDILHCMNDMYEGDERFRQVYKEFEQQKVCYLP IGE LLLKPLNRLLHYQ  
LILERLCDYYGEEHIDYADAMAVHLLVRSTKGIRSQLPDSANFVELCELQRDINFEQLVQPHRRLIRQGCLLKHSKRGL  
QQRMFFLFS D LLLYGSKSPLDQSFRI LGHPVRSLLTENAEHNTFSIFGGQCAITVSAGTTAEKTLWLAELSKAAADIKN

RPPNMQLQLTTLKNCSSSEGLDLFGLSNGNSSLNSSVNGGGPLTTQQQKLQLQQQQQNRTQPSRSNTALHVCWHRGAT  
VGLGDHLIAAEHQLSGYLLRKFKNSSGWQKLWVVFTSFCLYFYKSYQDEFALASLPLLGYTVGPPGHQDAVQKEFVKLS  
FKNHVYFFRAESAHTYNRWLEVL RSTTQTQDFKNVHSHAVLGN

>NP\_001036676.1 Chondrocyte-derived ezrin-like domain containing protein, isoform E [Drosophila melanogaster]

MSLADMGTASRSAGGEGGRHYDLATGGAGSGGHPVGGGLPGGRMTHSLSTPSGVDGTPSTPRHRGGKCLTVRIQMLDDSI  
TMFQVQAKALGRVLFEQVCRQLNLLEADYFGLEYQEVSHTTKYWLDLEKPMNRQVGLSLIDPVLRFCKFYTPDPAQLEE  
EYTRYLFCQLIKRDLATGSLQCNDNTAALMASYIVQASCGDFVPEDYPDHTYLSSYRFVPNQDATMQRKIMENHKKHVGG  
SPAEDLNLLTARRCELYGMKMHPAKDVEGVPLNLAVAHMGITVFQNTNITRINTFSWAKIRKISFKRKRFLVKLHPEGYG  
YYKDTVEFFFEGRNECKNFWKKCVENHGFFRCTAVQNTPRRKTRVLSRGSSFRYSGKTQKQIIEFVRENYVKRQNFQRSQ  
SFRQGPNLASSRSQSHTYVNSSISANPLLPIDTAAWDYRNQCSDSMTPSLTKKAADTLDRRDNPIGHMRSQVTAQAQVEI  
YQTKNYAADSPTSQEEAECSAAGAERQHHSAAVAMDKLNSNRSLSPQGPQSWTSPSHSSHQQRGPDPAHVHPGDHNTDGY  
YGINGNMSLDRRGEITTPTRYDLTLGSDKSSSLSRSEAGTYDVIQAEIQHAKRQELATGVATASHQNGNGNGNGHTLST  
QHDIEAEVKKRKWPTEPSYFLAKELMTERTYKKDLVLNTTFRQVLSLGDVEQLQPLFELLDLSLAQHNNLFLRDIEHRM  
VQWEGRGGHEAHRIGDVMMKHMAALPIYDEYVQTHLDILHCMNDMYEGDERFRQVYKEFEQQKVCYLPIGELLKPLNR  
L

LHYQLILERLCDYYGEEHIDYADAMAVHHLLVRSTKGI RSQLPDSANFVELCELQRDINFEQLVQPHRRLLIRQGCLLKHS  
KRGLQQRMFFLFSDLLYGSKSPLDQSFRILGHVPVRSLLTENAEHNTFSIFGGQCAITVSAGTTAEKTLWLAELSKAAA  
DIKNRPPNMQLQLTTLKNCSSSEGLDLFGLSNGNSSLNSSVNGGGPLTTQQQKLQLQQQQQNRTQPSRSNTALHVCWH  
RGATVGLGDHLIAAEHQLSGYLLRKFKNSSGWQKLWVVFTSFCLYFYKSYQDEFALASLPLLGYTVGPPGHQDAVQKEFV  
FKLSFKNHVYFFRAESAHTYNRWLEVL RSTTQTQDFKNVHSHAVLGN

>NP\_609186.1 Rabenosyn-5 [Drosophila melanogaster]

MSGNPFDSDQSSASGEILEGFLCPICRADLKSIDVLTDFHARQHAEEDALKSFKDIFTKAKKKILNPFEDKSGASVS  
SPAGSSSSAAGKNPNGNGDRNGPSNARSRLNVFN YMARQQPGAEC SHFEYFQSIRNPRLERYASETNKLIIRLHRLKDL  
PADSVQRRQHEQQTVAWLDGSSVKLCPSCAKSFHARRQHHCRLCGGIMCNDCKFLPLEDAMQLASLSTTRSEPLQQLH  
QHENAIRLCEHCLWLLDTRKDMHESRTCRLPLLVQVYEQIRQLQKEVTPDLDMYDKIINSLNEGDTIFTLADAGALRGKIG  
QVAEAMDMRSKRILAI FCEPGSREEALKKAIRLGC IQAIKERMLSPLPEESHIRQM QERRRMETEQRILTEQRMAMEA  
YERNNMAANQSNVGVPGPESGSFAQGS DLQSLNNWSAPQAASKSSLDPLIEQINI IKGYIKQARQDMNFEVVETLELNL  
RELQREVYERQRQSQGSTAASPTA

>NP\_611545.1 Rabaptin-5 [Drosophila melanogaster]

MEENETRSEAREPTDLPNGEDDATSQHKLSHLQNEMRKMQNEFNTQRAKMRELYIQKEAEVSQSQQERRQLQAELDELKT  
HLMVADLKSQNELQLRDLKAQEEISSLQQLVQDTIEETAHYKGEVERLRLELGKYQQIQQTMAQQPQAESSGGIAPQVL  
NQVKKTLGSVRKLGTDLSNSSFQQDEDTRASSKGNGKQYAPEEAEMMHSIVEQLQEEMKALKVKLREQDEQLQAKSASDE  
SALHKSTSM DVAESACESCSLAEKKTEELGAHINKQKQVDLLQKQLVESRETLVKEAALRKDLEDQWQEKREAHKSEVQ

SLRDQAKTNEQRLLDMQQKFLETKDEVIKQIQRVSDDRERVNKQLETQLADNDFLSGRYLATSEEIDNQYINLPNTVVVEL  
QELILRQQSELIQARVSSEYERQKCTSTEDEIQLRAQLEESNNERRAYKRKMQLDIKSLQDRVTEHLVTVQAYETTKTQ  
LERKEAELNKQLSECRVEIHELQEANEKYAKTNADYKTKIKTLQEELSTMETVQKDFVKLSQTLQMSLEELRHADTEVRW  
QDDDDVNNCPTCNAFYFTVMVRKIHCRHCGHIYCDKCLTKTVPSGPRKRVARVCDICHTLLTPNTAPYFSQGQPPQQQQGQ  
QQQQQSN

>NP\_611269.1 fab1 kinase, isoform A [Drosophila melanogaster]

MTSNNQNNSSSHQHLHSPSKLTEFARNFEDKPESLFGRVVNKIQNVYNQSYNTVNDISSGSSSSSTQPVQVVGKSQFFS  
DSQTSTAEIADVETSSQSSVRPQPPTTLSIRTNSETRGTSTSSNTAAEDSETSDRVETLPLPTSEANQGRTVSNVLKHIS  
NIVATKNNNDLRNYKDTTELQRFWMPDSKAKECYDCSQKFSTFRRKHHCRLCGQIFCSKCCNQVVPGMIRCDGDLKVCNY  
CSKIVLTFLLKSSSEMGMQDMQELQQHLSNKLEVQDSGSSLAKHPQMQRAPLPRKTSVGYQEERFSSHPTYTTLSIDDRKN  
ILQQSNSLITLHEEMQRDLPAQNCGQRLIEFLNSNNKSANEVQAVAILNAMLAAAGFLEPIVPDPEQMDFDSSLHYKFSKS  
SSSDTSRTMSPQFEANPHAEPQPPKSMDQSAEEKEKELENELENDRCYTTATSKLLASYCEHEEQLLAQMLRAHNLDQEW  
DKVLQMLCSTAANHFKEPHCSNDLMDIRNYVNFKKVPGGRRKDSKIVHGVAFSKNVAHKDMATHVFPFRILLQCPIVYE  
RIEGKFVTIETVLLQEKEYLRNVCARIMSFKNVVLVHKNVAGIAQDLLRSYEVTLVLDVKLSVMERLSRTLQCDIVSSI  
ESNITMPKLGVCNDFYIRNYNGKTLMFFEKLTPRGYTCLLRGGSNAELTRVKRVASALLFARYNWRLEMSFLLNEFAQP  
LSPKPSIFDSKETSPKTETEAEELRSKRPIILERKSEDKITTIVSENVSDFTDPLRASQAEALSTSPCAPPVVEALAVEPR  
YDNRFRALTSSLLSVSPFLTFFLPYLETEQGRKCKLRKLFPAELYFSKQWSRTGLERPDSMGDGEAGKSEPGNKENQMQ  
LLPAHDFVLMKITAPASSRDIQSKLAEFRSFGGRLPKGKAPMLRPKKKNAEVIQRPQKVSEEQLYKDALDPQNHQRLPVL  
FCSFHYNPKGVSFCKLPMLLDMMKFYGYDIMLEQFLQRYCCLFNSMCPSCNLPMLGHVRRYVHSLGCVHVYLTEDLTRS  
DPTRIYFTSWCSICNATTPTIPLSDAAKCLSLAKYLEMRFHGHAYKRRPPSTDAEQGGTVCEHSLHRDYVHHFSFRGVGA  
KFQYTPVEVWETDLPSLTVQLDLPPQFQSAQVQEEIKNFSIKGHEVYNRIHERIADLATEEENSPLVQHLKTMLTHDQFI  
FKQKIEIVHTLLTDNRATAYDTSDALAMARRALAESIELWGPRLQEIEKLTAQAHHIDSGTICTEELRPEQVQTADSSK  
VTSSLPKENDPLECPSEDTEGASNSQTVLDKNFSIDQMLASTVNVYSDKKSIRKILTQLPSGNQVNPLQSPFPAQDH  
LTLPLGSIPIHVRETDLSSVIAYSLTSMQYQKAIDEAEANSNAAHSSPQLKRKIPLAESVSDAEDSPSLRTSSNTSAAP  
NASVPSPATAASESEEKSKERIKQPPSPHITLAFQDHSCQFQCKIYFAREFDAMRSKSLKPPKLDKSLYRRLEKSKMREE  
LRISQSRTGSEMELVRKPSDVGAPRTTEDDSNQEEDARIALARSLCKSVQWEARGGKSGSRFCKTLDDRFLKEMNSRDM  
TIFEPFAPKYFEYIDRCQQQQQPTLLAKIFGVFRVSVKKKDSFVERSVMV MENLFYGCNIENKFDLKGSENRNLVDPSNQ  
QGEIVLLDENLVQMSWSKPLYVLSHSKTVLRDAIQRDSSFLEKNLVMDYSLLVGLDKKNGVLVLGIIDYIRTFTLTKRVE  
SIIKSGSILGGKGKDPTVVNPERYKQRFIDAMDRYFLTVPDRWEGLSKV

>NP\_731570.2 uncharacterized protein Dmel\_CG5270 [Drosophila melanogaster]

MEDQQEENMQQLNLLPKDQRQIFEIFIQWLNGKSSGPIQLHQNALLTVLQASYPALQLLQLLHERSKLHIGQIISTLL  
RQLLDGDVASPRSLCVLANFPASVLEASTLRQKLMTRLVVDSTSEHLMLTMLARSDGQLLDDLLHEQQLTMRAQCSEAA  
PTKLLVLWLALNEREHFVASVCQHLKDFKCFQDVTLRNNLLILRLANEFALGSQTLEELGCLEKLLAEFDVSAVPEKLQE

VHGFFYADFQRLSTLLNFLRPREISKTLRVDALLRAPGVLPLIHENGIHFKHQELHRLIEDTYKWQQLTPALKCHHQEEV  
EILSYTALCHVYDVVLDDQGEQTTKTKLVQLSVQLRQLHQLGALCSLLEDIFLLVFLRWEQLEPNSQRKGEDGENDEEDD  
EQYVDDDDVASPPRPTAVHSQRTRYGFICRSASLHALFTFLKAFVTKKIHSQDYKSAPEQQGRFQRLVDAISEALWKLGV  
QKIEQSLLKSAPSISCLLEPDQLQLVQLHSTAKKKASSDDESRRSNHASSLNRRKARRQRRAVSFSGGVAGKASADGG  
LAMEQLRARAQLLSGSGSRKNSSVTSPCERSIIPKMLSTPEQLAIMALALKNFNDVKKIETFHLEHSQNLRELHFMEQQ  
QLVKQKLSAIYANYQILEGQQANSGETTVEQIKGVAAGKFELSKIISVVDNFSQAHRLQQSPELKALIQRHNTSAQQGFL  
QQFEERNLNALIICDLIVNLGFNREITSNLLLVIIRQQQKKGGDEASNTPGSSELGAMNLLQNLCECMRLRLERSGQQA  
LNELLSLKSYPRLPAVLALQLQREAAFQTLYQKEPSEYSHGHELRSNANQFQQLRSRHNYARFCTYVQQLARLLQLRDP  
NLEYHTTQLLRNDPYEVIGELIYECGITPLEIEASVAALHLNLVHVIALNICPQLSEEPTKRLPRVVAPQKQESIHNYS  
QHNQLLAHILLAIQLGSLPDGDADVDFSFLGHLVHLSEVNVLASVYDGNRVLAALNAYKLESARLDQLVTDQEQLLQILL  
LGMSGQTDSPNRHKSRIIDQLIGDLIEKDPRIHLVVMGNLQGQRAQLLKEHFTRIPSSQQAELIERTLHHRSAAKSIPT  
ALRSELEHTLSBITIYARVSALLKFESWPQAYDFGRQTPNVIFEQLLQRRRFGLCLEWSRVVYLAGSAGQQRVCLLTLLD  
ALLELRDGEELDESLLGIVEMFPPNPLVNFLDTHKDKFRSLPLLQWVIDYLEGHARDPRLYRNYQLSLEFLRQMDTNS  
PFWKLIRHPLLIVEQLVMNARFELLGKLLDAARSKLLKERPLGPCPYCFDKTGHVYDVQSSAGLGSGAGETPAKIRFQLG  
QTTSEAFILLNFNSYQQDHVFGQDCLDLLRIYASKALDYHVANVRAASEPSSLGTDVHNSLDSLCAFMVMPKQAPNRQQ  
WTRDEEASHCMCCRAAFTMLMRRHHCRRCGRVVCYACSTHRIRIPELYDELEVRIKNDCAACSTPAKDQGDGTSSERSA  
ISGQVSKSSGRSDCKWQLSGIITHDKLLREEFSYEHAPSVALSLSILRNHVEQRSCVDLLLHFCRKLKELIVPNPEVDY  
GLVAKMINCLAAFAAKVRGAPGELENIREHSEIIMAVVQQGCESLIPTGPLNNHNLRLKLADALVEAEHWTLALEVHLKCGF  
ATTGVMAAHGLACL RAGCYDAAREKFAHCMTRLSSQLNSSICKNIFGVASTEAVLLPRKRPQRGPALLQEILQLIAIP  
QVQTQPETLHRASLRSSNTSLASLFTRRREPYVQPRPLQEPALNIMNALAGLKNLAKGQYGGQMPTSEESRRQERGFE  
SLHYVLTYGSHADILTFLMRREELRAALRYWQHQQLDADLFIHHIFYPQLANGGLNVLMDELQQLDDAQFTAWRLPLLQT  
CRHLEQQQQLSSLYQLQLLLKDPIRASMTVCVFYALQCENFQKLHANAQHLLSALRHLQGELDMAEWEHLQRQQARRNSV  
SSTASVRGACFAMQMDARALNGHINTIRRQLEVAKFLDKCEREQPPDEPLRTIQTCLKQIRLESSRGTLPTLFEGAADRIQ  
ICILILMCGKNIDEGFLAYGIMQDFKLAALKVFGATAKYLSRNQRLGEVERLLDCIGSNNGGDISTESDEILSIANAA  
VHSSAPETKQMLDRLIKRIGSVELRVSSYIYIGQLKSAYLLANKHDRLADIRILRQAELTGQVHIKKLCDMKLQLSAAP  
TPL

>NP\_001188779.1 WD repeat and FYVE domain containing 2, isoform B [Drosophila melanogaster]

MAAEIKPAQRTNNDRFNTSKKPELLSKLEGSSDDVNAAILIPGENGVISVDDKTVRVWLKRDSGQYWPSICQYMPSGCT  
AIEYVSESRHLYVGQENGTVTQYALSEDCNRLSFLRDYLSHQARVMVVFVSKTHKWILSAGKDKQFAYHCTESGKRVGGY  
NFETPCTALQFDALAKYAFVGDHAGQITMLRCDVQGVQLITTFNGHSAEIRCLKWVEGPQLLFSGACDQSVLVWDVGGKR  
GTIYELQGHNSNKVSALSYANHTQQQLISCGEDSVVVFWMENAMRKEVPGWVDTNQCQLCSRPFWFNFRSMMDQKQLGIRQ  
H  
HCRHCGKAVCDNCSTNRINIPIMGFEFDVRTCDPCYKQLQTVRPSLASFNDAKHSIVYMDLDEDRKRLTLVGQDRLIKI

WDLNIIWA

>NP\_611791.2 uncharacterized protein Dmel\_CG3530, isoform B [Drosophila melanogaster]

MDEIKLAKVENVRMIDRYNTKNPTVGTLTLTATHLIFVEPDSNKETWILHMHVASIEKLPLSTTGSPILLIRCKTFLSVTF  
VIPKDSECHDVYTSLLKLFQPVVSINKLYCFNYQPNKDDFPKNAGWDYFKLEAEFKHMLVPNEAWTLCMNEKEYELCDTYP  
RQIYVPKEATTMLLISSSRFRSKGRLPVLTYLHNNKASICRCSQPLSGFSARCLEDEQMLEAIRKTNSTNDYMYVVDTRP  
RINAMANRAAGKGYENEAIFYENIKFHLGIENIHVQRASLQKVLEACEQKSPTMSAFINALESSGWLKHRSILDTSSFI  
ANAVDKGVSVVVHCSDGWDRTAQVCSLAQLMLNPYYRTIKGFQALIEKDWLAFGHKFSERCGHIQTDAREVSPIFTQFLD  
CTWQLMSQRSEAFEFNERFLLILHDHVHSCQFGTFVGNCEKDRLDLKLAERTFSLWGYMANHLNEYINPLYKPNVDEAIK  
ANLAPQCIKFWRGMYSRFESGIHPREPLGDVLLDSKEHCNSLEDHVQHLLTKRIASFKNYISKSAKKLQDATSAPGKVNKE  
LSSNEINDNKYNYDKKLSLSAADDHPLKASNMSFASLSLSAEQSSPPQALPEEINSVAVDWKPMRNVTTCSCTPFDQ  
FSKKTCHWRCGDIFCERCIDKNVALPGHDSGKPVPCRGCFRQMOKQSP

>NP\_726322.1 uncharacterized protein Dmel\_CG3530, isoform A [Drosophila melanogaster]

MDITRFMNKFNIEERQLSPTSALRLSFDNISPETEPPDGNKRLWGVPPVPPVSEKVVSWIEEEFNAPVFYNGNSVLKK  
VENVRMIDRYNTKNPTVGTLTLTATHLIFVEPDSNKETWILHMHVASIEKLPLSTTGSPILLIRCKTFLSVTFVIPKDSEC  
HDVYTSLLKLFQPVVSINKLYCFNYQPNKDDFPKNAGWDYFKLEAEFKHMLVPNEAWTLCMNEKEYELCDTYPRIYVPKE  
ATTMLLISSSRFRSKGRLPVLTYLHNNKASICRCSQPLSGFSARCLEDEQMLEAIRKTNSTNDYMYVVDTRPRINAMANR  
AAGKGYENEAIFYENIKFHLGIENIHVQRASLQKVLEACEQKSPTMSAFINALESSGWLKHRSILDTSSFIANAVDKGV  
SVVVHHCSDGWDRTAQVCSLAQLMLNPYYRTIKGFQALIEKDWLAFGHKFSERCGHIQTDAREVSPIFTQFLDCTWQLMSQ  
RSEAFEFNERFLLILHDHVHSCQFGTFVGNCEKDRLDLKLAERTFSLWGYMANHLNEYINPLYKPNVDEAIKANLAPQCI  
KFWRGMYSRFESGIHPREPLGDVLLDSKEHCNSLEDHVQHLLTKRIASFKNYISKSAKKLQDATSAPGKVNKELSSNEIND  
NKYNYDKKLSLSAADDHPLKASNMSFASLSLSAEQSSPPQALPEEINSVAVDWKPMRNVTTCSCTPFDQFSKKTCHW  
RCGDIFCERCIDKNVALPGHDSGKPVPCRGCFRQMOKQSP

>NP\_001097433.1 uncharacterized protein Dmel\_CG3530, isoform C [Drosophila melanogaster]

MHVASIEKLPLSTTGSPILLIRCKTFLSVTFVIPKDSECHDVYTSLLKLFQPVVSINKLYCFNYQPNKDDFPKNAGWDYFKL  
EAEFKHMLVPNEAWTLCMNEKEYELCDTYPRIYVPKEATTMLLISSSRFRSKGRLPVLTYLHNNKASICRCSQPLSGFS  
ARCLEDEQMLEAIRKTNSTNDYMYVVDTRPRINAMANRAAGKGYENEAIFYENIKFHLGIENIHVQRASLQKVLEACEQK  
SPTMSAFINALESSGWLKHRSILDTSSFIANAVDKGVSVVVHCSDGWDRTAQVCSLAQLMLNPYYRTIKGFQALIEKDW  
LAFGHKFSERCGHIQTDAREVSPIFTQFLDCTWQLMSQRSEAFEFNERFLLILHDHVHSCQFGTFVGNCEKDRLDLKLA  
RTFSLWGYMANHLNEYINPLYKPNVDEAIKANLAPQCIKFWRGMYSRFESGIHPREPLGDVLLDSKEHCNSLEDHVQHLL  
TKRIASFKNYISKSAKKLQDATSAPGKVNKELSSNEINDNKYNYDKKLSLSAADDHPLKASNMSFASLSLSAEQSSPPQ  
ALPEEINSVAVDWKPMRNVTTCSCTPFDQFSKKTCHWRCGDIFCERCIDKNVALPGHDSGKPVPCRGCFRQMOKQSP

>NP\_647623.1 uncharacterized protein Dmel\_CG12099, isoform B [Drosophila melanogaster]

MDSNNSSNSKKQPQSSHGKSSSAESQRKSSSELHTNSNKQRHSRRRNQVPTPRNDQQQQPQPAKLRPNVDKRPKARGFG

GGYDFPSPRGQDGASGSSRLAYSATGYSRSGDFDHELNSVYTQGSKKQNLNHLNLFHCVPRELERGHHHQAQQHHGLSGR  
KQRYNKEQFLQANFQFVIRSGAKAQVNGSPDALIDWSYIEQINIQTTEELQCPICLYPPVAAKLTRCGHAYCWPCLLHYL  
SLSDKTWRKCPICYDAIHAGDLKSC TIEQLRDLQVGEKITFQLMRRRKGS MYIENHVAGLGETIERFPFVSAGEEAKRYS  
KFLIAKRMDVAAIHERERNELLAESDVSCPEDVFIQQALVMLQERVEKLGVEKPDPKEDDEEETAPVLCLETETKIDIEKS  
DDASISSGEASSLSYSSNHNKYYYFYQSNDGQNIYLHPLNVKMLQACYGTLDLGPLLIEAQIVQMEQHSMDEEHRRKFT  
CLGHLPLTCQFSVVEVELQPPVVTGGILKLFKEDILHRKKERQRRDREERKREQHINEINDRQMGKLIASAANLDLSSSH  
EFPTCGFEEALPAPSGSVPMNISNQDPGSRYS SVTLGSPKQEMWPTIGSNSPGGGGAPLDVQVGAWGRSAPPPPRAVMVP  
RTSDEDFEQRSVGHWGLGELLVGALDQKKQKVGA AKSNGAAPAESKKQKKAKGKKMVPLFATGMNRAP

### **Domains Architecture of *Danio rerio***

| <i>No</i> | <i>Accession Number</i> | <i>Domains</i>                                        |
|-----------|-------------------------|-------------------------------------------------------|
| 1         | NP_956538.1             | FYVE zinc finger, PH domain                           |
| 2         | NP_956634.1             | FYVE zinc finger, PH domain                           |
| 3         | XP_005164880.1          | RhoGEF domain, PH domain, PH domain, FYVE zinc finger |
| 4         | XP_017210510.1          | RhoGEF domain, PH domain, PH domain, FYVE zinc finger |
| 5         | XP_005164879.1          | RhoGEF domain, PH domain, PH domain, FYVE zinc finger |
| 6         | NP_001093450.1          | RhoGEF domain, PH domain, PH domain, FYVE zinc finger |
| 7         | XP_005155897.1          | RhoGEF domain, FYVE zinc finger, PH domain, PH domain |

|    |                |                                                                                                    |
|----|----------------|----------------------------------------------------------------------------------------------------|
| 8  | XP_001919894.2 | RhoGEF domain, PH domain, PH domain, FYVE zinc finger                                              |
| 9  | XP_001332264.7 | RhoGEF domain, FYVE zinc finger, PH domain                                                         |
| 10 | XP_021330870.1 | RhoGEF domain, FYVE zinc finger, PH domain                                                         |
| 11 | NP_001171404.1 | RhoGEF domain, PH domain, PH domain, FYVE zinc finger                                              |
| 12 | XP_688794.4    | RhoGEF domain, PH domain, PH domain, FYVE zinc finger                                              |
| 13 | XP_017212899.1 | RhoGEF domain, PH domain, PH domain, FYVE zinc finger                                              |
| 14 | XP_017212897.1 | RhoGEF domain, PH domain, PH domain, FYVE zinc finger                                              |
| 15 | XP_017212898.1 | RhoGEF domain, PH domain, PH domain, FYVE zinc finger                                              |
| 16 | XP_002667361.2 | RUN domain, FYVE zinc finger                                                                       |
| 17 | NP_001099151.2 | RUN domain, FYVE zinc finger                                                                       |
| 18 | NP_001231848.1 | RUN domain, FYVE zinc finger                                                                       |
| 19 | XP_003200485.1 | FYVE zinc finger                                                                                   |
| 20 | XP_001344504.2 | Domain of unknown function (DUF3480), Smad anchor for receptor activation (SARA), FYVE zinc finger |



|    |                |                                                                                                                                                                 |
|----|----------------|-----------------------------------------------------------------------------------------------------------------------------------------------------------------|
| 21 | XP_005171254.1 | Domain of unknown function (DUF3480), Smad anchor for receptor activation (SARA), FYVE zinc finger                                                              |
| 22 | XP_021328582.1 | FYVE zinc finger, FYVE zinc finger                                                                                                                              |
| 23 | XP_009304190.1 | Domain of unknown function (DUF3480), FYVE zinc finger                                                                                                          |
| 24 | NP_001071191.1 | FYVE zinc finger                                                                                                                                                |
| 25 | XP_005158933.1 | FYVE zinc finger                                                                                                                                                |
| 26 | XP_691596.6    | FYVE zinc finger, FYVE zinc finger , Guanylate-binding protein, N-terminal domain                                                                               |
| 27 | XP_009300450.1 | Regulator of chromosome condensation (RCC1) repeats, MORN repeats, Regulator of chromosome condensation (RCC1) repeat, Vacuolar sorting protein 9 (VPS9) domain |
| 28 | XP_009300452.1 | Regulator of chromosome condensation (RCC1) repeats, MORN repeats, Regulator of chromosome condensation (RCC1) repeat, Vacuolar sorting protein 9 (VPS9) domain |
| 29 | XP_009300451.1 | Regulator of chromosome condensation (RCC1) repeats, MORN repeats, Regulator of chromosome condensation (RCC1) repeat, Vacuolar sorting protein 9 (VPS9) domain |
| 30 | XP_021333894.1 | Myotubularin-like phosphatase domain, FYVE zinc finger                                                                                                          |
| 31 | NP_957158.2    | Myotubularin-like phosphatase domain, FYVE zinc finger                                                                                                          |
| 32 | NP_956162.2    | VHS domain, Hepatocyte growth factor-regulated tyrosine kinase substrate, FYVE zinc finger                                                                      |
| 33 | XP_021325300.1 | VHS domain, Hepatocyte growth factor-regulated tyrosine kinase substrate, FYVE zinc finger                                                                      |

|    |                |                                                                                                               |
|----|----------------|---------------------------------------------------------------------------------------------------------------|
| 34 | XP_021325297.1 | VHS domain, Hepatocyte growth factor-regulated tyrosine kinase substrate, FYVE zinc finger                    |
| 35 | XP_021325293.1 | VHS domain, Hepatocyte growth factor-regulated tyrosine kinase substrate, FYVE zinc finger                    |
| 36 | XP_021325291.1 | VHS domain, Hepatocyte growth factor-regulated tyrosine kinase substrate, FYVE zinc finger                    |
| 37 | XP_021332790.1 | RhoGEF domain, PH domain, PH domain, FERM C-terminal PH-like domain, FERM central domain, FERM adjacent (FA), |
| 38 | XP_002667032.4 | Myotubularin-like phosphatase domain, FYVE zinc finger                                                        |
| 39 | XP_021332402.1 | Myotubularin-like phosphatase domain, FYVE zinc finger                                                        |
| 40 | XP_009299405.1 | Myotubularin-like phosphatase domain, FYVE zinc finger                                                        |
| 41 | XP_005155593.1 | Domain of unknown function (DUF3480), FYVE zinc finger                                                        |
| 42 | XP_021325289.1 | VHS domain, Hepatocyte growth factor-regulated tyrosine kinase substrate, FYVE zinc finger                    |
| 43 | XP_005164430.1 | VHS domain, Hepatocyte growth factor-regulated tyrosine kinase substrate, FYVE zinc finger                    |
| 44 | XP_021325286.1 | VHS domain, Hepatocyte growth factor-regulated tyrosine kinase substrate, FYVE zinc finger                    |
| 45 | XP_021325285.1 | VHS domain, Hepatocyte growth factor-regulated tyrosine kinase substrate, FYVE zinc finger                    |
| 46 | XP_005155592.1 | Domain of unknown function (DUF3480), Smad anchor for receptor activation (SARA), FYVE zinc finger            |

|    |                |                                                                                                                                                                 |
|----|----------------|-----------------------------------------------------------------------------------------------------------------------------------------------------------------|
| 47 | XP_001920918.3 | Domain of unknown function (DUF3480), Smad anchor for receptor activation (SARA), FYVE zinc finger                                                              |
| 48 | XP_005165797.1 | Regulator of chromosome condensation (RCC1) repeats, MORN repeats, Regulator of chromosome condensation (RCC1) repeat, Vacuolar sorting protein 9 (VPS9) domain |
| 49 | NP_001096142.1 | Ankyrin repeats (3 copies), BTB/POZ domain, FYVE zinc finger                                                                                                    |
| 50 | XP_002662342.2 | Regulator of chromosome condensation (RCC1) repeats, MORN repeats, Regulator of chromosome condensation (RCC1) repeat, Vacuolar sorting protein 9 (VPS9) domain |
| 51 | XP_005171962.1 | Ankyrin repeats (3 copies), BTB/POZ domain, FYVE zinc finger                                                                                                    |
| 52 | XP_005157097.1 | Zinc finger FYVE domain-containing protein 21 C-terminus, FYVE zinc finger                                                                                      |
| 53 | NP_001153818.1 | Zinc finger FYVE domain-containing protein 21 C-terminus, FYVE zinc finger                                                                                      |
| 54 | XP_021336159.1 | FYVE zinc finger                                                                                                                                                |
| 55 | NP_991308.1    | WD domain, G-beta repeat, FYVE zinc finger                                                                                                                      |
| 56 | XP_009295365.1 | FYVE zinc finger, RUN domain                                                                                                                                    |
| 57 | XP_021332794.1 | RhoGEF domain, FERM C-terminal PH-like domain, FERM central domain, FERM adjacent (FA), FERM N-terminal domain, PH                                              |
| 58 | XP_021332793.1 | RhoGEF domain, PH, FERM C-terminal PH-like domain, FERM central domain, FERM adjacent (FA), FERM N-terminal domain                                              |
| 59 | XP_009300696.1 | RhoGEF domain, PH, PH, FERM C-terminal PH-like domain, FERM central domain, FERM adjacent (FA), FERM N-terminal domain                                          |

|    |                |                                                                                                                        |
|----|----------------|------------------------------------------------------------------------------------------------------------------------|
| 60 | XP_001344703.1 | FYVE zinc finger, FYVE zinc finger                                                                                     |
| 61 | XP_021333893.1 | Myotubularin-like phosphatase domain, FYVE zinc finger                                                                 |
| 62 | XP_021332792.1 | RhoGEF domain, PH, PH, FERM C-terminal PH-like domain, FERM central domain, FERM adjacent (FA), FERM N-terminal domain |
| 63 | XP_009302003.1 | Myotubularin-like phosphatase domain, FYVE zinc finger                                                                 |
| 64 | XP_017211771.1 | Beige/BEACH domain, FYVE zinc finger, PH domain associated with Beige/BEACH, WD domain, G-beta repeat                  |
| 65 | XP_017211770.1 | Beige/BEACH domain, FYVE zinc finger, PH domain associated with Beige/BEACH, WD domain, G-beta repeat                  |
| 66 | XP_017211768.1 | Beige/BEACH domain, FYVE zinc finger, PH domain associated with Beige/BEACH, WD domain, G-beta repeat                  |
| 67 | XP_005165446.1 | Beige/BEACH domain, FYVE zinc finger, PH domain associated with Beige/BEACH, WD domain, G-beta repeat                  |
| 68 | XP_017211769.1 | Beige/BEACH domain, FYVE zinc finger, PH domain associated with Beige/BEACH, WD domain, G-beta repeat                  |
| 69 | XP_001921741.4 | Beige/BEACH domain, FYVE zinc finger, PH domain associated with Beige/BEACH, WD domain, G-beta repeat                  |
| 70 | NP_001292489.1 | FYVE zinc finger                                                                                                       |
| 71 | XP_003199781.2 | FYVE zinc finger                                                                                                       |
| 72 | XP_021336195.1 | FYVE zinc finger                                                                                                       |

|    |                |                                                                                                                                                                                                  |
|----|----------------|--------------------------------------------------------------------------------------------------------------------------------------------------------------------------------------------------|
| 73 | XP_021336194.1 | FYVE zinc finger                                                                                                                                                                                 |
| 74 | XP_005167727.1 | Phosphatidylinositol-4-phosphate 5-Kinase, Phosphatidylinositol-4-phosphate 5-Kinase, TCP-1/cpn60 chaperonin family, Domain found in Dishevelled, Egl-10, and Pleckstrin (DEP), FYVE zinc finger |
| 75 | XP_005167726.1 | Phosphatidylinositol-4-phosphate 5-Kinase, Phosphatidylinositol-4-phosphate 5-Kinase, TCP-1/cpn60 chaperonin family, Domain found in Dishevelled, Egl-10, and Pleckstrin (DEP), FYVE zinc finger |
| 76 | XP_005167724.1 | Phosphatidylinositol-4-phosphate 5-Kinase, Phosphatidylinositol-4-phosphate 5-Kinase, TCP-1/cpn60 chaperonin family, Domain found in Dishevelled, Egl-10, and Pleckstrin (DEP), FYVE zinc finger |
| 77 | XP_009303000.1 | Phosphatidylinositol-4-phosphate 5-Kinase, Phosphatidylinositol-4-phosphate 5-Kinase, TCP-1/cpn60 chaperonin family, Domain found in Dishevelled, Egl-10, and Pleckstrin (DEP), FYVE zinc finger |
| 78 | NP_001120777.1 | Phosphatidylinositol-4-phosphate 5-Kinase, Phosphatidylinositol-4-phosphate 5-Kinase, TCP-1/cpn60 chaperonin family, Domain found in Dishevelled, Egl-10, and Pleckstrin (DEP), FYVE zinc finger |
| 79 | XP_005167722.1 | Phosphatidylinositol-4-phosphate 5-Kinase, Phosphatidylinositol-4-phosphate 5-Kinase, TCP-1/cpn60 chaperonin family, Domain found in Dishevelled, Egl-10, and Pleckstrin (DEP), FYVE zinc finger |
| 80 | XP_009302997.1 | Phosphatidylinositol-4-phosphate 5-Kinase, Phosphatidylinositol-4-phosphate 5-Kinase, TCP-1/cpn60 chaperonin family, Domain found in Dishevelled, Egl-10, and Pleckstrin (DEP), FYVE zinc finger |
| 81 | XP_009302999.1 | Phosphatidylinositol-4-phosphate 5-Kinase, Phosphatidylinositol-4-phosphate 5-Kinase, TCP-1/cpn60 chaperonin family, Domain found in Dishevelled, Egl-10, and Pleckstrin (DEP), FYVE zinc finger |
| 82 | XP_009302996.1 | Phosphatidylinositol-4-phosphate 5-Kinase, Phosphatidylinositol-4-phosphate 5-Kinase, TCP-1/cpn60 chaperonin family, Domain found in Dishevelled, Egl-10, and Pleckstrin (DEP), FYVE zinc finger |

|    |                |                                                                                                                                                                                                  |
|----|----------------|--------------------------------------------------------------------------------------------------------------------------------------------------------------------------------------------------|
| 83 | XP_009302998.1 | Phosphatidylinositol-4-phosphate 5-Kinase, Phosphatidylinositol-4-phosphate 5-Kinase, TCP-1/cpn60 chaperonin family, Domain found in Dishevelled, Egl-10, and Pleckstrin (DEP), FYVE zinc finger |
| 84 | NP_001007058.2 | WD domain, G-beta repeat, FYVE zinc finger                                                                                                                                                       |
| 85 | NP_571631.2    | RhoGEF domain, PH, FYVE                                                                                                                                                                          |
| 86 | XP_021332905.1 | RhoGEF domain                                                                                                                                                                                    |
| 87 | XP_697706.2    | Rabenosyn Rab binding domain, Rabenosyn Rab binding domain, FYVE zinc finger, Rabosyn-5 repeating NPF sequence-motif                                                                             |
| 88 | XP_017211441.1 | RhoGEF domain, FERM C-terminal PH-like domain, PH domain, PH domain, FERM N-terminal domain, FERM adjacent (FA), FERM central domain                                                             |
| 89 | XP_005171779.4 | Myotubularin-like phosphatase domain, FYVE zinc finger                                                                                                                                           |

### **Retrieved Sequences of *Danio rerio***

>NP\_956538.1 pleckstrin homology domain-containing family F member 2 [*Danio rerio*]

MVDRLANSEANSKRIGVVEACFGTAGQPLAIPGRVLIGEGVLTKLCRKRPKARQFFLFNDILVYGNIVIQKKKYNKQHII  
 PLESVTIDTVEDEGELRNGWLIKPTKSFVYAATATEKSEWMSHINKCVSDLLEKSGKSPTGEHAAVWVPDSEATVCMR  
 CQKMKFTPVNRRHHCRKCGFVVCGPCSEKKFLLPSQSSKPVRVCEFCYKQLSTGATLPPRSDSYSRQGSDFGSNNISDDD  
 DDDDSSD

>NP\_956634.1 pleckstrin homology domain-containing family F member 1 [*Danio rerio*]

MAEHLAFTIQNRERIQA VESSFGRTGKMLQKPGRFLVGEGLQKLCRRGPQPRVFYLFNDILVYGSIMLHGRWNNKQNII  
 PLEEVQQEDLEDGMAMANQWLIRTPRKSFYVSAESPEEKIAWMGHIEQYRTLHVKNKGLPAKKSGDDFATPWIPDVASAI  
 CMRCSKRFTVANRRHHCRRCGYIVCQACSKGRAVLPHISNRPVRVCRNCKNDMTDGMQRVQGKMRAKGNHWKKNKNSVED  
 TP

TMPEFENSSDEENENADECHQVPTKWFQSQEEDSFSA YCYIKPEHRNPPVGGH

>XP\_005164880.1 FYVE, RhoGEF and PH domain-containing protein 6 isoform X2 [Danio rerio]

MSTGMKKPPVAPKPKLVPLHKPSPPPIAPKPEILLSPSPPTAHKRGKPAVAPKPCLLKAPQKPVQARQDHCKNQHPPVSK  
NGGPALLSSNLSHYIIPPCNKVCHLANNKSNDSKEISREATLTTEVGVFKEGDSPEHLFSNDTWEHTARSEHVQE QVPT  
DSTQMSTEAQDETNSPSVEKDQTSTQVLTSDHIPRHCPTEPLQERSSEVKETGNVFSSCTSDSVGVPAPPSKPLPVPHPR  
RPRRALLRQNVVEIAPSDTQADIPTETPENAQSDGLQETPKNTTCHSHTSTLQNACCPKEDIENTDSDSSTKSDPLHKVD  
SFYNAQTEDMPSDLSTHYSVPTNGATLASMDTAVEDGSQPPAPPPRQKSLPQMVDLSLCKASTSVDNLLLHCQSDLQEVT  
SNDEDAESDDEDDGAYGDFARYPITRSLPKQIKLSCGSQVIAITKPYIDGDEKSPKVMPKKPQRNSLPASVALRKQGTTP  
PLPNSNPPVFGELPAPPQEKPSWRVALPSIPLFSRNQPTRSNSQPQAGVVGSVFVKQRAKSFSSADLQRVDNGSEASEQL  
ARSDQTRRSLRKLELRVCARLLPKLLRSGQSLDCTRDTSEYEEHKAVPANQVTSGDDEEAQGDSEADCGVEYENVPLYE  
EIPEYMNLPWVYSNQDADTDVYEVQEPCEANRCSVSADLSEDGLSSNEEDGDSSDSSKEDMRHSDKKEEVERAKRNKVH  
IAMEIMSSEKVFVDVLKLLHIDFRDAVAKATRASGKPLVEEKVLNQILYYLPQLYELNKDLLKELEERVAHWSDHQRLAD  
IFVQKGPYLMYSTYIREFDRNVALLDEQCRKNPPFSSVVRQFETSPRCASLALKHYLLKPVQRIPQYQLLLTDYLKNLP  
EDSSDYKDTQTALS VVKEVANHANDIMKQGDNFQKLMQVQYSLNGHHEIVQGRVFLKEGTLMKLSRKVMQPRMFFLFN  
D

ILLYTTPVQSGQYKVNMSMLSLAGMKVSKPSQEAYQNELNIESVERSFILSANSATERDEWLEAIAIDAIDYTRKKISFFS  
SRSQELEGISDDGLPLGSKAPIWIPDLRTTMCMICTCEFTLTWRRHHCRACGKVVCQACSSNKFYLEYLKNQLARVCDHC  
YIKLQHKGDQSNVTFSPSGRGSTFAFSRKQKKIPSALKEVSANTENSSMSGYLHRSKGHKKPWKRLWFIKNKVLYTYAA  
SEDVAALESQPLLGFLLREEKTGPAQKLQFKLYHKNTLYYIFRAEDIPTAQRWIEAFQEAMIL

>XP\_017210510.1 FYVE, RhoGEF and PH domain-containing protein 6 isoform X3 [Danio rerio]

MKKPPVAPKPKLVPLHKPSPPPIAPKPEILLSPSPPTAHKRGKPAVAPKPCLLKAPQKPVQARQDHCKNQHPPVSKNGGP  
ALLSSNLSHYIIPPCNKVCHLANNKSNDSKEISREATLTTEVGVFKEGDSPEHLFSNDTWEHTARSEHVQE QVPTDSTQ  
MSTEAQDETNSPSVEKDQTSTQVLTSDHIPRHCPTEPLQERSSEVKETGNVFSSCTSDSVGVPAPPSKPLPVPHPRRPRR  
ALLRQNVVEIAPSDTQADIPTETPENAQSDGLQETPKNTTCHSHTSTLQNACCPKEDIENTDSDSSTKSDPLHKVDSFYN  
AQTEDMPSDLSTHYSVPTNGATLASMDTAVEDGSQPPAPPPRQKSLPQMVDLSLCKASTSVDNLLLHCQSDLQEVTSNDE  
DAESDDEDDGAYGDFARYPITRSLPKQIKLSCGSQVIAITKPYIDGDEKSPKVMPKKPQRNSLPASVALRKQGTTPPLPN  
SNPPVFGELPAPPQEKPSWRVALPSIPLFSRNQPTRSNSQPQAGVVGSVFVKQRAKSFSSADLQRVDNGSEASEQLARSD  
QTRRSLRKLELRVCARLLPKLLRSGQSLDCTRDTSEYEEHKAVPANQVTSGDDEEAQGDSEADCGVEYENVPLYEEIPE  
YMNLPWVYSNQDADTDVYEVQEPCEANSRCSVSADLSEDGLSSNEEDGDSSDSSKEDMRHSDKKEEVERAKRNKVH  
IAMEIMSSEKVFVDVLKLLHIDFRDAVAKATRASGKPLVEEKVLNQILYYLPQLYELNKDLLKELEERVAHWSDHQRLADIFV  
QKGPYLMYSTYIREFDRNVALLDEQCRKNPPFSSVVRQFETSPRCASLALKHYLLKPVQRIPQYQLLLTDYLKNLPEDS  
SDYKDTQTALS VVKEVANHANDIMKQGDNFQKLMQVQYSLNGHHEIVQGRVFLKEGTLMKLSRKVMQPRMFFLFN  
DILL  
YTTPVQSGQYKVNMSMLSLAGMKVSKPSQEAYQNELNIESVERSFILSANSATERDEWLEAIAIDAIDYTRKKISFFSSRS

QELEGISDDGLPLGSKAPIWIPDLRTTMCMICTCEFTLTWRRHHCACGKVVCQACSSNKFYLEYLKNQLARVCDHCYIK  
 LQHKGDQSNVTFSPSGRGSTFAFSRKQKKIPSALKEVSANTENSSMSGYLHRSKGHKPKWKRLWFVIKNKVLYTYAASED  
 VAALESQPLLGFLLREEKTGPAQKLQFKLYHKNTLYYIFRAEDIPTAQRWIEAFQEAMIL  
 >XP\_005164879.1 FYVE, RhoGEF and PH domain-containing protein 6 isoform X1 [Danio rerio]  
 MSTGMKKPPVAPKPKLVPLHKPSPPPIAPKPEILLPSPSPTAHKRGPAPVAPKPCLLKAPQKPVQARQDHCKNQHPPVSK  
 NGGPALLSSNLSHYIIPPCNKVCHLANNKSNDSKEISREATLTTEVGVFKEGDSPEHLFSNDTWEHTARSEHVQEQVPT  
 DSTQMSTEAQDETNSPSVEKDQTSTQVLTSDHIPRHCPTEPLQERSSEVKETGNVFSSCTSDSVGVPAPPSKPLPVPHPR  
 RPRRALLRQNVVEIAPSDTQADIPTETPENAQSDGLQETPKNTTCHSHTSTLQNACCPKEDIENTDTDSSTKSDPLHKVD  
 SFYNAQTEDMPSDLSTHYSVPTNGATLASMDTAVEDGSQPPAPPPRQKSLPQMVDLSCKASTSVDNLLLHCQSDLQEV  
 SNDEDAESDDEDDGAYGDFARYPITRSLPKQIKLSCGSQVIAITKPYIDGDEKSPKVMPPKKPQRNSLPASVALRKQGT  
 PLPNSNPPVFGELPAPPQEKPSWRVALPSIPLFSRNQPTRSNSQPQAGVVGSVFVKQRAKSFSSADLQRVDNGSEASEQL  
 ARSDQTRRSLRKLELRVCARLLPKLLRSGQSLDCTRDTSEYEEHKAVPANQVTSGDDEEAQGDSEADCGVEYENVPLYE  
 EIPEYMNLPWVYSNQDADTDVYEVQEPCEANSRCSVSADLSEDGLSSNEEDGDSSDSSKEDMRHSDKKEEVERAKRNKVV  
 HIAMEIMSSEKVFVDVLKLLHIDFRDAVAKATRASGKPLVEEKVLNQILYYLPQLYELNKDLLKELEERVAHWSHDHQLA  
 DIFVQKGPYLMYSTYIREFDRNVALLDEQCRKNPPFSSVVRQFETSPRCASLALKHYLLKPVQRIPQYQLLLTDYLNK  
 PEDSSDYKDTQTALSVVKEVANHANDIMKQGDNFQKLMQVQYSLNGHHEIVQPGRVFLKEGTLMKLSRKVMQPRMFFLFN  
 DILLYTTPVQSGQYKVNSMLSLAGMKVSKPSQEAYQNELNIESVERSFILSANSATERDEWLEAIAIDAIDYTRKKISFF  
 SSRSQELEGISDDGLPLGSKAPIWIPDLRTTMCMICTCEFTLTWRRHHCACGKVVCQACSSNKFYLEYLKNQLARVCDH  
 CYIKLQHKGDQSNVTFSPSGRGSTFAFSRKQKKIPSALKEVSANTENSSMSGYLHRSKGHKPKWKRLWFVIKNKVLYTYA  
 ASEDVAALESQPLLGFLLREEKTGPAQKLQFKLYHKNTLYYIFRAEDIPTAQRWIEAFQEAMIL  
 >NP\_001093450.1 FYVE, RhoGEF and PH domain-containing protein 6 [Danio rerio]  
 MKKPPVAPKPKLVPLHKPSPPPIAPKPEILLPSPSPTAHKRGPAPVAPKPCLLKAPQKPVQARQDHCKNQHPPVSKNGGP  
 ALLSSNLSHYIIPPCNKVCHLANNKSNDSKEISREATLTTEVGVFKEGDSPEHLFSNDTWEHTARSEHVQEQVPTDSTQ  
 MSTEAQDETNSPSVEKDQTSTQVLTSDHIPRHCPTEPLQERSSEVKETGNVFSSCTSDSVGVPAPPSKPLPVPHPRRPRR  
 ALLRQNVVEIAPSDTQADIPTETPENAQSDGLQETPKNTTCHSHTSTLQNACCPKEDIENTDTDSSTKSDPLHKVDSFY  
 NAQTEDMPSDLSTHYSVPTNGATLASMDTAVEDGSQPPAPPPRQKSLPQMVDLSCKASTSVDNLLLHCQSDLQEVTSNDE  
 DAESDDEDDGAYGDFARYPITRSLPKQIKLSCGSQVIAITKPYIDGDEKSPKVMPPKKPQRNSLPASVALRKQGTPLP  
 NPNPPVFGELPAPPQEKPSWRVALPSIPLFSRNQPTRSNSQPQAGVVGSVFVKQRAKSFSSADLQRVDNGSEASEQLARSD  
 QTRRSLRKLELRVCARLLPKLLRSGQSLDCTRDTSEYEEHKAVPANQVTSGDDEEAQGDSEADCGVEYENVPLYEYEEIPE  
 YMNLPWVYSNQDADTDVYEVQEPSMTVEFVNAFLTFISHWLVCDELSVPAKQRCALAVGFQMHRTLQACGRVFGNVSM  
 LPTNIYMSADLSEDGLSSNEEDGDSSDSSKEDMRHSDKKEEVERAKRNKVVHIAMEIMSSEKVFVDVLKLLHIDFRDAV  
 KATRASGKPLVEEKVLNQILYYLPQLYELNKDLLKELEERVAHWSHDHQLADIFVQKGPYLMYSTYIREFDRNVALLDE



QCRKNPPFSSVVRQFETSPRCASLALKHYLLKPVQRIPQYQLLLTDYLNLPEDSSDYKDTQTALSVVKEVANHANDIMK  
QGDNFQKLMQVQYSLNGHHEIVQPGRVFLKEGTLMLKLSRKVMQPRMFFLFNDILLYTTPVQSGQYKVNMSLSLAGMKVSK  
PSQEAYQNELNIESVERSFILSANSATERDEWLEAIATAIDDYTRKKISFFSSRSQELEGISDDGLPLGSKAPIWIPDLR  
TTMCMICTCEFTLTWRRHHCACGKVVCQACSSNKFYLEYLKNQLARVCDHCYIKLQHKGDQSNVTFSPSGRGSTFAFSR  
KQKKIPSALKEVSANTENSSMSGYLHRSKGHKKPWKRLWFKVKNKVLTYAASEDVAALLESQPLLGFLLREEKTGPAQKL  
QFKLYHKNTLYYIFRAEDIPTAQRWIEAFQEAMIL

>XP\_005155897.1 FYVE, RhoGEF and PH domain-containing protein 5 isoform X2 [Danio rerio]

MSRPCPSTRGPKPPVAPKPRLASEVSHSIVGNGDITSSDRLELKQDNKSDVAQEESDKSRENCTDDQAENDLYDKEFAVN  
YDTTCYDEIEDKLQMAVDETMGEDEDKNVTEIQHATTLSLSEAVDECLDSADEFHSKSADDIKPAESREVIYNVLED TSA  
CSENDTSTKACESQSPYEEIEEPPLNSFQCANGQYEEDIGAGANCVHHEAEEDGTGLSSKATNCSQPSLCEEYPYDIIGT  
LDDNNTWQAERATKDPSGRFRFAEETEDAFEPYSVIEVVPDLMCTADPETRCTDEESSNVKPMDSSENTTEGTSNQEPYY  
VSSEDVEDLEEEQAKLENGVSLPASEVQEMDKNEEVDDYADIEDHEGDDHQVECASSEDYVEIGDEDEPLNMERKTKGKS  
VRERSARRRHDLSSQRNSCQPRRLRCNITVPADLDLGRTPELTNRVVF AHTTEAFEEDIEELDCHIVPFFEDSDTESDEH  
IYEEAGFDSEGENFISLDRKSIVTRSRLSGKVPGYVPETVPEETGTEYQSHDYTYVALDQNGDPHPKPSDEAEANRIIP  
SLKPRRFLSPRSLSVEGRDLQLSGHFEGEKSLREEYRLQRKDDTLSPCVITSSGSFSQRSHQSSSGVSTPTSLVDIPP  
PFELAYITKRPVTKSSPSLLIQHDS PDNPKKKKTSFKRFLALKFRKKSESKSRGDGSVRSSRSSSESSHGPIRVLELDR  
RSTSGSPKLQSHAGKPQRNSEIPTTFLLYKERQSRQGALKSYNSRGISRVSFEDRTRPPFMPLPLTKPRSISFPSADTS  
DYENIPAMSSDYENIQIPHGRPTRAVTITEFFDDHNRTAAPANENDGYVDMNSFAGIENKSTTREQDTE SAYTEPFVCP  
VSATVSNEEDHGRTSEEDGCGDHCHDRQIDGRSRAYYVAKDLVDSEREHV KALKVVLQEDFRAAVESGGDDNGPLIENGK  
LDEIFSTLPQAYSLHSEILNELETRIKQWEDSPTVVDVILTRRAEFSSFATYISNYDRSMSVLDESCRKSQAFEDVVKQF  
ETQNAEGVLVPLKHQLLRVIVRILQYRMLLTDYLNLSLSPDSKEYEDTQAALVIVSEVADQVNDNLKHGENLLRLVHIDYS  
VRGKRDLQPGRVFVKEGTLMKVSRKSRQPRHLFLMNDVMLYTYPPQDGKYRLKNTLTLSGMKVSKPIIDNVNLTLRIEV  
SDVTITLSASSLGEREDWFHTLSRAIADHAAGLNTFSSSSEAREKLWMSLGEAAPVLVPVSHVMMCMNCTSDFSLT LRRH  
HCNACGKVVCRCSCRNRYP LKYLKDRMAKVCDHCY AELRKRGDVP GSCGSVSPRTHRASRPLSAVFQSLQPPSLWRNRK  
SSSPLTQVSVGAEGSTMSGSLQRRKKS KRRWKRLWFLLDKDKDVASELSLQGF TVKLSDRSEGEDTDNVFQLYHKKTLY  
YTFRADDQPTARRWVNAMEEATVL

>XP\_001919894.2 FYVE, RhoGEF and PH domain-containing protein 5 isoform X1 [Danio rerio]

MSRPCPSTRGPKPPVAPKPRLASEVSHSIVGNGDITSSDRLELKQDNKSDVAQEESDKSRENCTDDQAENDLYDKEFAVN  
YDTTCYDEIEDKLQMAVDETMGEDEDKNVTEIQHATTLSLSEAVDECLDSADEFHSKSADDIKPAESREVIYNVLED TSA  
CSENDTSTKACESQSPYEEIEEPPLNSFQCANGQYEEDIGAGANCVHHEAEEDGTGLSSKATNCSQPSLCEEYPYDIIGT  
LDDNNTWQAERATKDPSGRFRFAEETEDAFEPYSVIEVVPDLMCTADPETRCTDEESSNVKPMDSSENTTEGTSNQEPYY  
VSSEDVEDLEEEQAKLENGVSLPASEVQEMDKNEEVDDYADIEDHEGDDHQVECASSEDYVEIGDEDEPLNMERKTKGKS  
VRERSARRRHDLSSQRNSCQPRRLRCNITVPADLDLGRTPELTNRVVF AHTTEAFEEDIEELDCHIVPFFEDSDTESDEH

IYEEAGFDSEGENFISLDRKSIVTRSRSLSGKVPGYVPETVPEETGTEYQSHDYITVALDQNGDPHPKPSDEAEANRIIP  
 SLKPRRFLSPRSLSVEGRDLQLSGHFEGEKSRLREEYRLQRKDDTLSLPCVITSSGSFSQRSHQSSSGVSTPTSLVDIPP  
 PFELAYITKRPVTKSSPSLLIQHSDPDNPKKKKTSFKRFLALKFRKKSESKSRGDGSVRSSSRSSSESSHGPIRVLELDR  
 RSTSGSPKLQSHAGKPQRNSEIPTTFLLYKERQSRQGALKSYNSRGISRVEFEDRTRPPFMPLPLTKPRSISFPSADTS  
 DYENIPAMSSDYENIQIPHGRPTRAVTITEFFDDHNRTAAPANENDGYVDMNSFAGIENKSTTREQDTESAYTEPFPVCP  
 VSATVSNEEDHGRTSEEDGCGDHCHDRQIDGRSRAYYVAKDLVDSEREHVKALKVLQEDFRAAVESGGDDNGPLIENGK  
 LDEIFSTLPQAYSLHSEILNELETRIKQWEDSPTVVDVILTRAEFSSFATYISNYDRSMSVLDESCRKSQAFEDVVKQF  
 ETQNAEGVLVPLKHQLLRVIVRILQYRMLLTDYLNNSPDSKEYEDTQAALVIVSEVADQVNDNLKHGENLLRLVHIDYS  
 VRGKRDLQPGRVFVKEGTLMKVSRKSRQPRHLFLMNDVMLYTYPPQDGKYRLKNTLTLSGMKVSKPIIDNVNLTLRIEV  
 SDVTITLSASSLGEREDWFHTLSRAIADHAAGLNTFSSSSEAREKLWMSLGEAAPVLVPVSHVMMCMNCTSDFSLTLLRRH  
 HCNACGKVVCRCSCRNRYPKYLKDRMAKVCDCYAE LRKRGDVPVSGSGSVSPRTHRASRPLSAVFQSLQPPSLWRNRK  
 SSSPLTQVSVGAEGSTMSGSLQRRKKSKRRWKRLWFLKDKVLYTFKAREDKVAESLSLQGFTVKLSRSEGEDTDNVF  
 QLYHKKTLYYTFRADDQPTARRWVNAMEEATVL

>XP\_001332264.7 FYVE, RhoGEF and PH domain-containing protein 4 isoform X1 [Danio rerio]

MSAVSRSKNVKHSIDAEEKGNVLNSCSDLKHHVHWQKTRFRRAVGGRTSGSQGSAGAQVEDSASSFLKDASSVLRKSAV  
 YSVSAMPPPAVLPKPKFQCPPKISAANVIDGEQTDNDKTRERTTSDQSASSECAASSFSASDQSSGWDVWSGWWSEEV RG  
 QQEESGRGN GASVEKEEEQSRWKQDGLNEDMENDEDKPSVENDEDQQEQVNKLKLFKISSELLQTERAYVSRLHLLDQVF  
 CVRLTEEALKGSFPVDVVKGIFSNVGSITFHSQFLLPDLETRMSQWDSKPRVGDVLAQLAPFLRMYAEYVKNFDSAMEL  
 LKLWMERSTQFSAIQDIQSQEVCGSLTLQHMLPEPVQRVPRYEMLLKDYLKKLPEDDED RSQAQKSLNIISMAATHSNM  
 AIRKMENLKKLMEIYEMLGGEEDIVNPSNELIKEGQILKLAARNTSSMERYLFLFNNMLLYCVPKFSLVGQRFTVRTRVR  
 VEGMKVLETSNEDYPHTFQVSGKERTLELQASSQQDKEDWIKAFQETIEIFQQKNETFKSACKEATDEVSKHEELGKRAPR  
 WIRDNEVTMCMKCKEPFNALTRRRHHCACGYVVCYKCSDHKASLRYSNKLNVCKDCYHILTGRADAEPPVCGKKKG  
 I

LEIEAAQVSGNSFLCGFLQYSDRTKPSQRVWCVIPQHDAVLVLYYGAPQDVKALCTIPLLGYQVEDVQRSVDHPPTGFRL  
 CQSKYIHCFTAETEEVKLRWLKVIRKAVIGEMPECQTPVDGDLVNGCHEGATDGT

>XP\_021330870.1 FYVE, RhoGEF and PH domain-containing protein 4 isoform X2 [Danio rerio]

MFEKVRKSAYDVEEFRKTAFRRRSAGLNVEKKKKVRRGSVPGSQGSAGAQVEDSASSFLKDASSVLRKSAVYSVSAMPPP  
 AVLPKPKFQCPPKISAANVIDGEQTDNDKTRERTTSDQSASSECAASSFSASDQSSGWDVWSGWWSEEV RGQQEESGRGN  
 GASVEKEEEQSRWKQDGLNEDMENDEDKPSVENDEDQQEQVNKLKLFKISSELLQTERAYVSRLHLLDQVFCVRLTEEAL  
 KGSFPVDVVKGIFSNVGSITFHSQFLLPDLETRMSQWDSKPRVGDVLAQLAPFLRMYAEYVKNFDSAMELLKLWMERST  
 QFSAIQDIQSQEVCGSLTLQHMLPEPVQRVPRYEMLLKDYLKKLPEDDED RSQAQKSLNIISMAATHSNMAIRKMENLK  
 KLMEIYEMLGGEEDIVNPSNELIKEGQILKLAARNTSSMERYLFLFNNMLLYCVPKFSLVGQRFTVRTRVRVEGMKVLET  
 SNEDYPHTFQVSGKERTLELQASSQQDKEDWIKAFQETIEIFQQKNETFKSACKEATDEVSKHEELGKRAPRWIRDNEVTM

CMKCKEPFNALTRRRHHCRACGYVVCYKCSDHKASLRYDSNKLNVCKDCYHILTGRADAEPPVCGKKKGILEIEAAQVS  
GNSFLCGFLQYSDRTKPSQRVWCVIPQHDAVLVLYGAPQDVKALCTIPLLGYQVEDVQRSVDHPPTGFRLCQSKYIHCF  
TAETEEVKLRWLKVIRKAVIGEMPECQTPVDGDLVNGCHEGATDGT

>NP\_001171404.1 FYVE, RhoGEF and PH domain-containing protein 4a [Danio rerio]

MQEGGLDGAIGKGRVSNLISRFEENRHTDGRREGTPPKQVSRSPNCSPPRKNYQRPREQTSOSSPHHALKPPNGVLAKMN  
RDRDRERDMEGVTHAPVPIARINKQGLLNGDSVDLTKREITEEECVDSPDVHLNQAKEEEEEQEKRVSEQSDIVRMNSIP  
EQKETNEQKLYKIANELLQTEKAYVARLNLLDKVFYTKLMEEARKDTFPVDVVKSIKSNITSINAFHSQFLPDLEKRMG  
EWTSTPRIGDILQKLTPFLKMYAEYVRNFDHAMDLLKQRIDRSPPFKAIILDIQSQEVCGNLTLQHMMLEPVQRVPRYEM  
LLKDYLLKKLPPEHMDRRDAEKSLEIIGMAATHSNTAIRKTENLKKLLEIYEMLGEEEDIVNPSNELIKEGHILKLAARNT  
SAMDRYLFLFNMLLYCVPKFSLVGQKFTVRTRIGIEGMNVKETFNEDYPHTFQVSGKERTLELQASSKLDKESWIKAF  
ETIDISLQKNETFKSAIKDTEEASDLNISELGKRAPRWIRDNEVTMCVKCKEGFNATRHHCRACGYVVCWKCSYKA  
TLEYDGNKISKVCKHCYFILTGRDSDREGKKKGILEIEAAQFCGSSIMCGFLQYCERNKPWQKVWCVIPEKEALVLYL  
YGAPQDVKAQSTIPLLGYHVEDNPRATDPPASFRLSQSKSIHSFAAESEELKQRWLKVIRMAVTGEVPESPEENSSAEIT  
EELNSNGN

>XP\_688794.4 FYVE, RhoGEF and PH domain-containing protein 1 isoform X1 [Danio rerio]

MQLNRPKSAHLISSSPHNSSSYSSQFKSMRFSYHISSGLPSPQPALRRTGSSSSSPRLTKSLSLDPGCLGAHETPQRL  
CSDPGPLEPQHCHNGTSENGPQDVPPPPPKTRPPLPGPKPQVPPKPPHLQQQNARRPRPPDKPLPPPPSRPLPADPRQSR  
ATMPRAEGSSSPTCVLSLIEKFEREQIIVVPDITGGVMCTPRVPDQQAATPGSLSPQTSEFILPCTSLQEPLAELAEDEL  
EKEEKEEEEEEDVDETEEDDSELGASCSDKRLSMESGYGASDKLLDNMEMTANQSEIPSDRLSLPPAQMDGKLANRDSGI  
DSISSPSHSEELCFVGDEDRVGHIERICPCSPGPGISCSYVEGPDEEGAGGEEAGRDSEGDSDLEEGSGDESEMNPALQ  
PLPKAERQDSTEMSVQQRVFNIANELLHTEKAYVSRLHLLDQVFCAQLMEEARARSSFPCEMVMGIFSNICSIYCFHQF  
LLPALEKRMEEWDLNPRIGDILQKLAPFLKMYGEYVKNFDRAMELVNTWMQRSSQFKTIHNIQKEEMCGNLTLQHMMLE  
PVQRIPRYELLLKDYLLHRLPEDADDFKDAQKSLELIATAAEHSNAAIRKMERMRKLLKVYELLGGEEDIVNPTNELIKEG  
HILKLSAKNGTSQDRYLILFNDRLLYCVPKLRLLIGQKFGVRARIDVDGMELKETSSMNVPRFTLVSGKQRSLELQARTEE  
EKRDWIAIQAQTIQRHEQTLETFRMLNCSFREEDLTPPNSPNCSELGKRAPTPIREKEVTLCMKCQEPFNSITKRRHHCK  
ACGHVVCCKCSEFRARLLYDNNRANRVCIDCYTMLVGVPSPASLSSSTQRRRSILEKQASVAAENSVLCSFLHHMEKGS  
GRGWQKAWFVIPENEPLVLYIYGAPQDVKAQRSPLIGFEVSLPESGDRLERRFAFKMSQSHLTVYFSADCEELQRRWME  
VLSRAGRGEELQSNGPICEALEEEGEEPAPTGEST

>XP\_017212899.1 FYVE, RhoGEF and PH domain-containing protein 1 isoform X4 [Danio rerio]

MTGFVFCCAMYMDKTSVLRGPCLGAHETPQRLCSDPGPLEPQHCHNGTSENGPQDVPPPPPKTRPPLPGPKPQVPPKPPHL  
QQQNARRPRPPDKPLPPPPSRPLPADPRQSRATMPRAEGSSSPTCVLSLIEKFEREQIIVVPDITGGVMCTPRVPDQQA  
TPGSLSPQTSEFILPCTSLQEPLAELAEDELEKEEKEEEEEEDVDETEEDDSELGASCSDKRLSMESGYGASDKLLDNM  
EMTANQSEIPSDRLSLPPAQMDGKLANRDSGIDSISSPSHSEELCFVGDEDRVGHIERICPCSPGPGISCSYVEGPDEEG

AGGEEAGRDSEGSDLEEGSGDESEMNP MALQPLPKAERQDSTEMSVQQRVFNIANELLHTEKAYVSRLHLLDQVFCAQL  
MEEARARSSFPCEMVMGIFSNICSIYCFHQQFLLPALEKRMEEWDLNPRIGDILQKLAPFLKMYGEYVKNFDRAMELVNT  
WMQRSSQFKTIIHNIQKEEMCGNLT LQHMLPEVQRIPTYELLLKDY LHRLPEDADDFKDAQKSLELIATAAEHSNAAIR  
KMERMRKLLKVYELLGGEEDIVNPTNELIKEGHILKLSAKNGTSQDRYLILFNDRLLYCVPKLRLIGQKFGVRARIDVDG  
MELKETSSMNVPRTFLVSGKQRSLELQARTEEEKRDWIQAIQATIQRHEQTLETFRMLNCSFREEDLTPPNSPNCSELGK  
RAPTPIREKEVTLCMKCQEPFNSITKRRHHCKACGHVVC GKCSEFRARLLYDNNRANRVCIDCYTMLVGVPSPASLSSS  
TQRRRSILEKQASVAAENSVLCSFLHHMEKSGRGWQKAWFVIPENEPLVLYIYGAPQDVKAQRS LPLIGFEVSLPESGD  
RLERRFAFKMSQSHLTVYFSADCEELQRRWMEVLSRAGRGEELQSNGPICEALEEEGEEPAPTGEST

>XP\_017212897.1 FYVE, RhoGEF and PH domain-containing protein 1 isoform X2 [Danio rerio]

MQLNRPKSAHLISSSPHNSSSYSSQFKSMRFSYHISGLPSPQPALRRTGPCLGAHETPQRLCSDPGPLEPQHCNGTSEN  
GPQDVPPPPPKTRPPLPGPKPVPPKPPHLQQQNARRPRPPDKPLPPPPPSRPLPADPRQSRATMPRAEGSSSPTCVLSL  
IEKFEREQIIVVPDITGGVMCTPRVPDQQATPGSLSPQTSEFILPCTSLQEPLAELAEEDELEKEEKEEEEEEDVDETEE  
DDSELGASCSDKRLSMESGYGASDKLLDNMEMTANQSEIPSDRLSLPPAQMDGKLANRDSGIDSISSPSHSEELCFVGDE  
DRVGHEREICPCSPGPGISCSYVEGPDEEGAGGEEAGRDSEGSDLEEGSGDESEMNP MALQPLPKAERQDSTEMSVQQR  
VFNIANELLHTEKAYVSRLHLLDQVFCAQLMEEARARSSFPCEMVMGIFSNICSIYCFHQQFLLPALEKRMEEWDLNPRIG  
DILQKLAPFLKMYGEYVKNFDRAMELVNTWMQRSSQFKTIIHNIQKEEMCGNLT LQHMLPEVQRIPTYELLLKDY LHRL  
LPEDADDFKDAQKSLELIATAAEHSNAAIRKMERMRKLLKVYELLGGEEDIVNPTNELIKEGHILKLSAKNGTSQDRYLI  
LFNDRLLYCVPKLRLIGQKFGVRARIDVDGMELKETSSMNVPRTFLVSGKQRSLELQARTEEEKRDWIQAIQATIQRHEQ  
TLETFRMLNCSFREEDLTPPNSPNCSELGKRAPTPIREKEVTLCMKCQEPFNSITKRRHHCKACGHVVC GKCSEFRARLL  
YDNNRANRVCIDCYTMLVGVPSPASLSSSTQRRRSILEKQASVAAENSVLCSFLHHMEKSGRGWQKAWFVIPENEPLV  
LYIYGAPQDVKAQRS LPLIGFEVSLPESGDRLEERRFAFKMSQSHLTVYFSADCEELQRRWMEVLSRAGRGEELQSNGPIC  
EAL EEEGEEPAPTGEST

>XP\_017212898.1 FYVE, RhoGEF and PH domain-containing protein 1 isoform X3 [Danio rerio]

MTGFVFCCAMYMDKTSVLRGSSSSSPRLLT KSLSLDPGPCLGAHETPQRLCSDPGPLEPQHCNGTSENGPQDVPPPPPKT  
RPPLPGPKPVPPKPPHLQQQNARRPRPPDKPLPPPPPSRPLPADPRQSRATMPRAEGSSSPTCVLSLIEKFEREQIIVV  
PDITGGVMCTPRVPDQQATPGSLSPQTSEFILPCTSLQEPLAELAEEDELEKEEKEEEEEEDVDETEEDDSELGASCSDK  
RLSMESGYGASDKLLDNMEMTANQSEIPSDRLSLPPAQMDGKLANRDSGIDSISSPSHSEELCFVGDEDRVGHEREICPC  
SPGPGISCSYVEGPDEEGAGGEEAGRDSEGSDLEEGSGDESEMNP MALQPLPKAERQDSTEMSVQQRVFNIANELLHTE  
KAYVSRLHLLDQVFCAQLMEEARARSSFPCEMVMGIFSNICSIYCFHQQFLLPALEKRMEEWDLNPRIGDILQKLAPFLK  
MYGEYVKNFDRAMELVNTWMQRSSQFKTIIHNIQKEEMCGNLT LQHMLPEVQRIPTYELLLKDY LHRLPEDADDFKDAQ  
KSLELIATAAEHSNAAIRKMERMRKLLKVYELLGGEEDIVNPTNELIKEGHILKLSAKNGTSQDRYLILFNDRLLYCVPK  
LRLIGQKFGVRARIDVDGMELKETSSMNVPRTFLVSGKQRSLELQARTEEEKRDWIQAIQATIQRHEQTLETFRMLNCSF  
REEDLTPPNSPNCSELGKRAPTPIREKEVTLCMKCQEPFNSITKRRHHCKACGHVVC GKCSEFRARLLYDNNRANRVCID

CYTMLVGVPPSPASLSSSTQRRRSILEKQASVAAENSVLCSFLHHMEKSGRGRWQKAWFVIPENEPLVLYIYGAPQDVKA  
QRSPLIGFEVSLPESGDRLERRFAFKMSQSHLTVYFSADCEELQRRWMEVLSRAGRGEELQSNGPICEALEEEGEEPAP  
TGEST

>XP\_002667361.2 RUN and FYVE domain-containing protein 1 [Danio rerio]

MADEDPNTKVESGDVPAKEEEPEVTETGQEDVANNTDELQKDRPADSSWSAPILSFARKATETLSSGVNHYSAGLKTPDT  
TQQHSSDPVKIAAVKDPVVVERSNNLSMMKLSIKVLIQSSLSLGRITLDSEYPPLQQFFVVEHCLKHGLKVRKSFGLQN  
KSIWAPLEMIEKLCPEADIATSVRDMPGIKTGLGRARAWLHLALMQKKIADYMKVLINRRDLLGEFYEPGALVMEEEGA  
VIVGMLVGLNVIDANLCVKGEDLDSQVCVIDFSMYLKDPQATESKQDDSKMTAILDQKHIEELNRHLSCTVTDLQAKMD  
SLEKTNSKLIEELTAATDRINALREEQEQLKQENANILQSSQRKEEVTLQDSQVELETYRQTRQGLDEMYSVVWKQYKEE  
KRIRQELQKELELQIGLKQEMEVAAMKLLKDTHEKQDTLVALRQQLDQVKNLNLQMFNKAQASDRVAQKKEEDMVHLEK  
K  
MIQMEAAMKELEQRLQNSQEDVQKNTDEQQNEIRTEMKGKVNALQKRLSDLDTLRAGLETLSAEKEQRQILQKELQREQD  
NSAELRTQLQQLQGLQTELLDLRQEKQQLQQLCEEQEALQEMGLHLSQSKLKMEDFKEVNKALKGHAWLKDDEATQCK  
Q

CQKEFSISRKHHCRCNGDIYCGNCSSNELALPSYPKPVRVCDVCHSLLLQRSSTGS

>NP\_001099151.2 RUN and FYVE domain-containing protein 2 isoform 2 [Danio rerio]

MYSPQSLHRWGITHSESMERLAYSQAFRDPMAMERANLLNMAKLSIKGLIESALSFGRTLDSDYPPLQQFFVVMHCLKH  
GLKVKSFLGYNKSLLWGPLEMVEKLCPEAGEIAASVRDLPGLKTPLGRARAWLRLALMQKKLADYLRLITRKDILSEFY  
ESSAVMLEEEGAVIVGLLVGLNVIDANLCVKGEDLDTQVGVIDFSMYLKNDIDYRSEERNGQIAAILDQKNYVEELNRQ  
LNSTVQGLQGRVESLEKNNSKLIEELAIKNNIILQEENHQLRTENSVILMKAQQRLAVTEGDLSCELDTYKQSRQGLD  
EMYNEARRQLKEECQLRQDVENELVVQVSMKQEMEMAMKLLKDIHEKQDTLIGLRHQLDEVKAINVEMYQKMQSDDDS  
M

RQKNDMIARLEEKTNQITATMKQLEQRLQDAERERASAEDGVRKFKQDFTNKAESLQKQIVQREKQMTQLETDLKIERDW  
RQTLQNELERERETITQLAAEAQQINGLKKEFHRLQDENTQLKGICEEQEHALEELGCKLSESKLIEDIKEANKALQGG  
QVWLKDKDATHCKLCEKEFSISRKHHCRCNGEIFCNACSDNELPLPASPKPVRVCDTCHAMLLQRCSSNTT

>NP\_001231848.1 RUN and FYVE domain-containing protein 2 isoform 1 [Danio rerio]

MATPAEQDLVLAEAEAGNKERTQVFGILRLQEDKSAGEKASSPAMKSGDGRWQAPIFALARKASETFSGGIHVLPKVTEPK  
TSPFTEEWGARAFRDPMAMERANLLNMAKLSIKGLIESALSFGRTLDSDYPPLQQFFVVMHCLKHGLKVKSFLGYNKS  
LWGPLEMVEKLCPEAGEIAASVRDLPGLKTPLGRARAWLRLALMQKKLADYLRLITRKDILSEFYESSAVMLEEEGAVI  
VGLLVGLNVIDANLCVKGEDLDTQVGVIDFSMYLKNDIDYRSEERNGQIAAILDQKNYVEELNRQLNSTVQGLQGRVES  
LEKNNSKLIEELAIKNNIILQEENHQLRTENSVILMKAQQRLAVTEGDLSCELDTYKQSRQGLDEMYNEARRQLKEEC  
QLRQDVENELVVQVSMKQEMEMAMKLLKDIHEKQDTLIGLRHQLDEVKAINVEMYQKMQSDDDSMRQKNDMIARLEEK  
T

NQITATMKQLEQRLQDAERERASAEDGVRKFKQDFTNKAESLQKQIVQREKQMTQLETDLKIERDWRQTLQNELERERET  
ITQLAAEAQQINGLKKEFHRLQDENTQLKGICEEQEHALEELGCKLSESKLKIEDIKEANKALQGGQVWLKDKDATHCKL  
CEKEFSISRKHHCRCNCGEIFCNACSDNELPLPASPKPVRVCDTCHAMLLQRCSSNTT

>XP\_003200485.1 early endosome antigen 1 [Danio rerio]

MLRRILQMTPGKGGSQSSESEQPSADMNNESSEGFICPQCMKSHNSAEELFKHYEVFHEPGDQSPFSPGREDLTLLRQE  
IQDLQASLKEERWFSEELKKELDKVQGRIATNKGQLSDGTSGEDAELEMRLNESETEKFNKQMKDLFEQKAAQLATEIV  
DIKSRYDEEKSMREALEQRLANLNQDMQKEKQEKEKLSAELLQRPGVEDVEVLKKELVQVQTLMDNMTREREEESERLKG  
QYEQLQANFTTSEKTIAQLKAELEKGPQEAAYVTQQIHQLQSSLNNLQQSQALSEKLSRKEKENQELEERLGHEQASKK  
SLQANLHQKELELQESRARVSSGEAALSRAQAEATERGEEAARLRRELGELEKNQQELKAERKQLQQQREDKENQGLQQQ  
SEISQLHAKLLEAERQVGELQGRLKEQRQLSGEKLKDREQQAADLQLKLSRLEEELKESSTKSTDQLHQLDKSKQQHQEL  
QTLQQSTNGKLREAQNDLEQVLRQIGDKDQKIQNLEALLQKSKESVSQLETEREDLCAKIQAGEGEAALLNQLQEKNHSL  
QEQITQLTDKLNQSESHKQAQDNLHEQVQEQTHLRSAQDRCQGLETTVTELNTQLTESREKIAQLDTQLKAKTEMLLS  
AEAANKNAQRADLESHLETAQNALQDKQQELSKVQAQLEEQARRLTEKQEQCSQLENGLKDSRDKLMTAEQRIETLQTQTK  
KAEVELTELRSGREQAQKEQSSLKKQISELEMKTKELNRLLDSEKQGASTQQEELKKKSSALTETRQKLEKAEQERGAQ  
ANLDKLSQEGQKQQAELDKKVQGLSSDLQKTQGEKETLVKEVATVKEALSKASKALKESQTQLDKEKKGSKATLEEKEKV  
FQKVQQELQKNSEATSKELSNVKGLLEKSIEAEKSLQSQLTALNAQLKQCQDTLKEKEKSEQQLQAEKTRQGSFSQEVK  
KLKTQVSELQASLAKKTEEEAKQKEQITALSKDLSSEKNRCAELQKTSKGESLTALQSDYYGKESELSAVRQDLKVCE  
EKLVLAEELVTNRNQLSAYETQIQELKTGHTAMEIDLKRDEKIKQQVETLQKLQKQQGQTEEQKKKEKAQCEELRESQ  
SALEKDKNKLADLKTALAEKNEKELKDLQAAKQLLIQKQVEMQGVAAQASVEKEQREHQKTRDSIKQNEQQKKAETNK  
IKQQQLASEVKAKEEMVRQREEAEVKMSMQVTALNENVATLKRQWQSSQRRVGELEKQTDDELRGIAVLEATVQNNQDERR  
ALLERCQVQEGEMEKLQAKMLEMRRKLDDTTAAMQELGRENQSLQIKQSQSLTRKWTEDEHVQNCMACGKGFSVTVRKH  
H

CRHCGNIFCAECSARNALTPSSKKPVRVCDNCFDELQG

>XP\_001344504.2 zinc finger FYVE domain-containing protein 9 isoform X2 [Danio rerio]

MENYFQAEAFNLDKVLDEFEQNEDETDTPILSDAKWTQILAPPSHLLSLNPALTHSDLSPRDSPISFKPLLDQTSDGPS  
LVEVTRLNGKQGLGQQQEGKSEERPADVYSPPLPQPNIGKL VSTDGQLADLPSFNSGVLENGYPASPDHTVQSDIIRFND  
DETNPVIDKKCLKDTGPCELKLEQNGHISDAGRDFISTEESEDKPSILKNGVKMETSKDES VSPSCKVGIRDNSNGLC  
PEGSSSHKGV LHKSVNGGGELDCGRENDEGA FQNGVMVENENTEKDNSASNQEEKEKMLKTDHKGMHKESLEGERCLSD  
G

LVEDLDGDAQNQLAVSSKEDSVTEEKEIEESKQETCDPVRQLESGRGTGKLNN SRLQPVSIPYGGARPKQPVNLKLQIPQP  
LSNQVQNEFGTNSKNKNMEPQSRTGGLDASSEATESGVVQINGEHGNGSSGLIIPSESPDNDLQAGQQGAFSKKPLSSLG  
EVAPVWVPDSQAPICMKCEVKFTFTKRRHHCRACGKVFC AACCSLKSRLMYMDRKEARVCVTCHCALINAQTWENTGSG  
C

NQSPNPNNPAEYCSTIPPLQQAQASGALSSPPPTVMVPVGVVKQPGSEGLPREQRRVWFADGILPNGEATDSSKAPAA  
 PNPSQPVATSQNSNKSSGANASEAVHSGALTTSPVGSSFSFLIPEDGLPPILISTGVKGDYAVEERPSEIALMQQLEEGC  
 PDPLVFVLNANLLAMVKLVNYVNRKCWYMTTKGMHAVGQAEVVLLQCLPDEKTIPKDIFTHFVQLYREALAGNVLGHL  
 G  
 HSFFTQSFLGSKEHGGFLYVNPTFQTLQDLPLPNSPYLFGILVQKWETPWAKVFPRLMLRLGAEYRFYPCPLFSVRFRK  
 PLFGETGHTIMNLLADFRNYQYTLPVVKGLVVDMEVRKTCIKIPSNRYNELMKAMNKSNEHVLAMGACFNDRADSHLVCV  
 QNDDGNYQTQAISIIHQPRKVTGASFFVFSGALKASSGYLAKTSIVEDGVMVQITAETMEALRQALREMKDFSACGKAD  
 QEENQEHVQVQWVDDDHNVNKGVISPIDGKSMESVTSVKIFHGSEYKANGKVIKWTEVFFLRSEDQNNGLSDPADHSRLA  
 ENVARAFCMALCPHLKLLKEDGMAKLGLRVTLDSQVGYLAGSNGQPLLQYLSELDALIPVIHSGACQLSEGPVVMEL  
 IFYILEIIS  
 >XP\_005171254.1 zinc finger FYVE domain-containing protein 9 isoform X1 [Danio rerio]  
 MENYFQAEAFNLDKVLDEFEQNEDETDTPILSDAKWTQILAPPSHLLSLNPALTHSDLSPRDSPISEKPLLDQTSDGSP  
 LVEVTRLNGKQGLGQQQEGKSEERPADVYSPPLPQPNIGKLVSTDGQLADLPSFNSGVLENGYPASPDHTVQSDIIRFND  
 DETNPVIDKKCLKDTGPCELKLEQNGHISDAGRDFISTEESEDKPSILKNGVKMETSDESVPSCVKGIRDNSNGLC  
 PEGSSSHKGV LHKSVNNGGELDCGRENDEGAQNGVMVENENTEKDNSASNQEEKEKMLKTDHKGMHKESELEGERCLSD  
 G  
 LVEDLDGDAQNQLAVSSKEDSVTEEKEIEESKQETCDPVRQLESGRGTGKLNNRLQPVSIYPGGARPKQPVNLKLQIPQP  
 LSNQVQNEFGTNSKNKNMEPQSRTGGLDASSEATESGVVQINGEHGNGSSGLIIPSESPDNDLQAGQQGAFSKKPLSSLG  
 EVAPVWVPDSQAPICMKCEVKFTFTKRRHHCRACGKVFCACCSLKSRLMYMDRKEARVCVTCHCALINAQTWENTGSG  
 C  
 NQSPNPNNPAEYCSTIPPLQQAQASGALSSPPPTVMVPVGVVKQPGSEGLPREQRRVWFADGILPNGEATDSSKAPAA  
 PNPSQPVATSQNSNKSSGANASEAVHSGALTTSPVGSSFSFLIPEDGLPPILISTGVKGGTGGHITDYAVEERPSEIALM  
 QQLEEGCPDPLVFVLNANLLAMVKLVNYVNRKCWYMTTKGMHAVGQAEVVLLQCLPDEKTIPKDIFTHFVQLYREALA  
 G  
 NVLGHLGHSFFTQSFLGSKEHGGFLYVNPTFQTLQDLPLPNSPYLFGILVQKWETPWAKVFPRLMLRLGAEYRFYPCPL  
 FSVRFRKPLFGETGHTIMNLLADFRNYQYTLPVVKGLVVDMEVRKTCIKIPSNRYNELMKAMNKSNEHVLAMGACFNDR  
 DSHLVCVQNDDGNYQTQAISIIHQPRKVTGASFFVFSGALKASSGYLAKTSIVEDGVMVQITAETMEALRQALREMKDFS  
 IACGKADQEENQEHVQVQWVDDDHNVNKGVISPIDGKSMESVTSVKIFHGSEYKANGKVIKWTEVFFLRSEDQNNGLSDP  
 ADHSRLAENVARAFCMALCPHLKLLKEDGMAKLGLRVTLDSQVGYLAGSNGQPLLQYLSELDALIPVIHSGACQLSE  
 GPVVMELIFYILEIIS  
 >XP\_021328582.1 zinc finger FYVE domain-containing protein 1-like [Danio rerio]  
 MNHRKDGVPHMADGLCQYAHQYNNKVLICKKCYEGGREVIVIPKTSASTDNPWFGLAKYAWSGYVLECASCGIYRSRQY

WMGNQDPRESSVVRPEVKHVVWQGTDAFQTDHQNAAQRVLDGMNYIIQSVTEYSSGPTKAVAAWLTQVAPPYWKPNAEIS  
E  
CHGCKRVFEEVERKHHCRACGQGFCQACSTHSMVPERGWGGTPVRVCDACYRQGGPQHCGQVSSTEPRTLVARKVTEV  
A  
QSTLDMVSTAVDYPLCFIKGVARPDYWVPDHEITQCHCCAkvFTPSMSKHHCRACGEGVCGNCSSKTRAVPSRGWDHPVR  
VCDTCAEIRDSL

>XP\_009304190.1 zinc finger FYVE domain-containing protein 9 [Danio rerio]

MRQAVTATLSVWGERRFGYSTLKDSSESLLDERKLRPGLKEDSVIEEKERAENEQEQLAVLGPPSSPVEDTHQSGTTEP  
SDAMLESCQDQKTS DGMEASLVSGPKNIDSGRKGS LGALPVQRCSSLGTTAPQWVPDSQAPACMKCGSKFSFTKRRHHCR  
ACGKVFCVCCDLRYKLTHLGGKEGRVCVTCHSTLINRTL RKDQKKVWFADNVLPQSESRSANSSPIHRSVSHTQSAGLA  
QADVSDLRAADEVSGLSSNTKPTPKDLPPILTSTGVKGDYTL EEEKRTESSLLEELERGLAEPLVFVLNANLLAVVKIVS  
YVNRRCWCVM SKGMH AVGQPEVVILLQCLPEEKRFPTDIFNHFIQIYWDAQTAGKLLNHL SHSLVSRGFLGNNEHAGFVY  
VRPTFQSLEGLPLPAPPFLFGLMLLRAEVPWAKAFPLRLMLRLGAEYRFYPCPLFSVRFREPLFGPVNNSIMRLLVD FRF  
YRYTLPTVPGLVVDLEARSTCIRIPKTHHPELLKALNKSNERVLALGACFNEQADSHLICVQTADGQYQTQAISIHSQPR  
RVTGSCFFVFSGALKPSSGYLAKSSIVEDGLMVQITMETMAELRRCLRDMKDFTVTCGKLHPAERQEYVHIQWQDEEPRF  
NKGIVSPIDGKSME SLTNIKTHQRLEFRANGKLIRWTEVYYLLKDQHPNGLNNHTSHNRLTERLARAFCLALCQSLCLLK  
EDGMTKLALRVILDGQKMEFLAGSNQRLPAPYQDCLNQSLMSVVQSNSQYQGLAACQLELIFYILEDTS

>NP\_001071191.1 lateral signaling target protein 2 homolog [Danio rerio]

MMNRFRKWLYKPKRSDPQLLAQFYYADEELNQVATELDSLDGRKDPQRCTLLVNQFRSCQDNVLNINQIMDECIPEERA  
NRDFCVKFPEEIRHDNL AGQLWFGAECLAAGSIIMNREIESMAMRPLAKDLTRSLEEVNITRDQALRDLNHYTERIKEA  
LRHFDGLFAEFELSYVSAMVPVKSPKEYYIQQEVIVLFCETVERALKLEYLTQDMIDDYEPALMFTIPRLAIVCGLVIYS  
EGPLNLD RKPEDMSE LFRPFR TLLRKIRDLLQTLTEEELMTLERSLCISQDGEFPTSSTNDPSASTGPDSQTEELEKEKG  
VEEVVDLTLFVTQEDSVWKEEEEKQVLPESSESESEEEPIDADLACSMQYDEEEIEQLNMMVHQVGDEMSTLLSPPSQNNQ  
SPAHRPRPYNGSSLEGSSATSS TQASPRRAPGSYHDDDRVFFMDDLESGLSSEL CRGQLPLPTVCLRSPEGSSCNGWLT V  
CQSSDATNLGCQRKLSQSTESVGN SDRMVNGWEGLQDEDSVQTAE EIANRTGGMKLSATVIFNPHSPSLSDLA VVLPQSA  
DAPEGGEGGALVATQCLLNSCVCCAGGCVDNHEDAMEPAGRSMALGF EKHKLTITSSVIQSAVAAGSPGKGNGHLPLTLP  
PSQGH LTHSVPNCSVQNQAREDEGSQDGIHYPCCEKCS PGVLLAQDRGSGHEGGPSCTLQDTGCQTQHNASVKGRSECFG  
KQSKDDNRKINSSSQESPLSSVPSSDIDGVSVTTC SLSSSYAPSPVSSLTSSDMSEDLDHQEIQVALQA AKLAAHNKIR  
SRFHSSSDLIHRLFVCISGVADQLQTN YASDLRSILKTLFEVMATKTDQGDNEKPKKG PCLGSAVLEDCALCQETISSE  
LAAKAREGQFEDPPEWVPDEACNSCIACKAPFTVIRRKHHCRSCGKIFCSRCS SHSAPLPRYGQM KPVRVCTHCYMFHVT  
PFYSDRTGI

>XP\_005158933.1 lateral signaling target protein 2 homolog isoform X1 [Danio rerio]

MMNRFRKWLYKPKRSDPQLLAQFYYADEELNQVATELDSLDGRKDPQRCTLLVNQFRSCQDNVLNINQIMDECIPEERA



NRDFCVKFPEEIRHDNLAGQLWFGAECLAAGSIIMNREIESMAMRPLAKDLTRSLEEVNITRDQALRDLNHYTERIKEA  
LRHFDGLFAEFELSYVSAMVPVKSPKEYYIQQEVIVLFCETVERALKLEYLTQDMIDDYEPALMFTIPRLAIVCGLVIYS  
EGPLNLDKPEDMSELFRPFRTLLRKIRDLLQTLTEEELMTLERSLCISQDGEFPTSSTNDPSASTGPDSQTEELEKEKG  
VEEVVDLTLFVTQEDSVWKEEEEKQVLPESSESESEEEPIDADLACSMQYDEEEEIEQLNMMVHQVGDEMSTLLSPPSQNNQ  
SPAHRPRPYNGSSLEGSSATSSTQASPRRAPGSYHDDDRVFFMDDLESGLSSELRCGQLPLPTVCLRSPEGSHCRPDASC  
NGWLTVCQSSDATNLGCQRKLSQSTESVGNSDRMVNGWEGQLQDEDSVQTAEIEIANRTGGMKLSATVIFNPHSPSLSDLAV  
VLPQSADAPEAGEGGALVATQCLLNSCVCCAGGCVDNHEDAMEPAGRSMALGFEEKHKLTTSSVIQSAVAAGSPGKGNH  
LPLTLPPSQGHLTHSVNCSVQNAAREDEGSQDGIHYPCCEKCSPGVLLAQDRGSGQEGGPSCTLQDTGCRTQHNASVKG  
KSECFGKQSKDDNRKINSPVSSLTSSDMSEDLDHQEIQVALQAAKLAHNKIRSFRHSSSDLIHRLFVCISGVADQLQT  
NYASDLRSILKTLFEVMATKTDQGDNEKPKKGPCLGSAVLEDCALCQETISSSELA AKAREGQFEDPPEWVPDEACNSCI  
ACKAPFTVIRRKHHCRSCGKIFCSRSSHSAPLPRYGQMKPVRVCTHCYMFHVTPFYSDRTGI  
>XP\_691596.6 zinc finger FYVE domain-containing protein 1 isoform X1 [Danio rerio]  
MSEMLLKDMDEISLGPVKMDEQKENGSRFLLVDENESLQVKNEAHFLQKLGCSGAQGVKVVSI FGNTGDGKSHTLNHVLF  
DREEVFATSPSPSSCTVGVAAYDPQLNLIVLDTEGLLGAATQQNRRMRLLLKVLA VSDVVIYRTRAERLHNDMFQFLGS  
ASAAYLKHFTPELRLALSSRCGLDVPLSSLGPAIIVFQETSRTQLLGQDVSGLGQADTLLQKRFDLQSTDAFSSVQYVG  
TQTITPPTDYSQLQHTVQQQVSNTSQRAPRQPAIVFSALQALSDRFCGEISDDKFSICSFFPDEYFTCPSVCLSCNVRCK  
NGMNRKDGVPHEMADGLCQYAHQYNNKVLICKKCYEGGREVIVIPKTSASTDNPWFGLAKYAWSGYVLECA SCGIYRSR  
QYWMGNQDPRESSVVRPEVKHVWQGTDAFQTDHQNA AQRVLDGMNYIIQSVTEYSSGPTKAVAAWLTDQVAPPYWKPN  
EI  
SECHGCKRVFEEVERKHHCRACGQGFCQACSTHSMPPVPERGWGGTPVRVCDACYRQGGPQHCGQVSSTEPRTL VARKVTE  
VAQSTLDMVSTAVDYPLCFIKGVARPDYWVPDHEITQCHCCAKVFTPSMSKHHCRACGEGVCGNCSSKTRAVPSRGWDHP  
VRVCYTCAEIRDSL  
>XP\_009300450.1 alsin isoform X1 [Danio rerio]  
MEKLISSGEGDSSGERGLLHTWKGYSTAPERVLLSRPVLQAALGARHGVLLVEGGQVYSFGELPWKQNQTSSAEPILE  
AVLSEQRVVFVAAGSAHSGVVTE DGGVHMWGENVHGQCGLLGLSVIPNPTVGVLDSEATPPQTVKILEVACGDQHTLAL  
SAKHEVWAWGSGCQLGLNTSTFPVWKPKVDHLSGRHVLQVACGSAHSVALVRCLPPPQEPRKPPQDKCGQCHQLLYTM  
T  
DKEDHVIISDGHHCPLGVEMDSTEIKSAVEGSPDPGKPGKSSPTEPVPCMSTQISKSPSSNISSESTRPPESTLPFELQN  
QVPAYCQESIEAPVEDSAAHEAPAAAGEVCVEASENSIPEPDSCRSSGKSPYPDEQAVKAYLKRLSDHALAEHTIKTSST  
IHSAQLSGDPANLFASEPLIPVAQSVTPMGSALNNLVVSCASAVGERVVSTYEALSLRKVIGYWVPGEGRERVEERLRLE  
ESMQGKKSSSLGDIREEEAELSRRLSLPGLLSQDNAESEVKASSNTTTEVSPRLLRRTSRPRMRAVPLASGGIPETDAH  
LPSLQTEVWSWGQGDGQLGHGDLPLRLQPDCKSLNGKEVLKVAAGAHSLALTAQSQVFSWGCNTSGQLGHMESPTT  
F

PQLTKLSDGIRVWDIGAGLQHTLLLADGDCIQPILYYSGQQVKEVPEPTEEEEQTAEYTQQPVLLPFCMNLGYVSSVYAG  
 GRTCAALTDCNVMGFIASLHELAAAERKYYCKLSNIKSLLLQPLLKLDLSSALGQSSAGLLQNLIGRMSRLSQLTGQNS  
 ASLTSFLQRSRDIRGLVILED AHLFLD TYSEYSSAVGDLLVMGGFQALVKPCHDVFGKGAEVVQRLSECSEEGTLADVL  
 AHLFYLPKHLHEYGRLLLKLATCYEVSSVDYQKLQDACSKFESMALHLKRRRKEAEYTLHFWKSFP GKMTDSL RKPSRR  
 LICESSNKAL TLQ NAGRFSVNWFILFNDALVHAQGMVPYKSLFSTHHIFPLATLWVEPISEESTGVYGLKVTSP EESFAL  
 LASSPAEKAKWLR SINQAVEQALSGLGHDGIPPSTGMTQRADPPISRTASYTFYKDSRLKDAKYDGRWVSGKPHGRGVVK  
 WPDGRMYTGTFTKNGFEDGFGDYVVS NKTLNSCDHYQGQWKDGKMHGFGTFRYASGEVYEGSFQDNMRHGHGMLRSGK  
 LNS  
 TSPSVFIGQWQYDKKSGYGVFDDITRGEKYMGMWLDDQRQGNGVVVTQFGLYYEGA FSNKMMGTGVLLSEDDTTFEGE  
 F  
 LEDWTLNGKGVLTMPNGDYIEGSFCGVWGTGLKMSGSYKPSLYDSDKEKGHALKLGR LAVHSEEKWKAVFLECWNRLG  
 C  
 DSPVQGQTTTAWDNIAIALTANLRQQRDSPELLSRSHHKTLESLECIPQHVG PVTLEVYHTIRRYLVKACDTPLHPLGRL  
 VETLVSVYRMTYVGVGANRRLLPQAVNEITSYLSRIFQLVRFLPELPEEGSLADPPKEKVGTDADGKLLESPKPGCVV  
 SSSALLLPVLLPRLYPPLFTLYALEKEKEDDVYWECVLR LNKQPD LALLAFLGVQQKFWPVTVTIHGEKQQVLSSTKDAC  
 FASAVETLQQISTTFTPSDKLQVIQLTFEITQEV LALLKQDFLWSMDDLFPVFLFVVLRRIRNLGSEVSLIEDLMDPC  
 VQHGEHGIMFTTLKACYYQIQHEKVT  
 >XP\_009300452.1 alsin isoform X4 [Danio rerio]  
 MEKLISSGEGDSSGERGLLHTWKGYSYSTAPERVLLSRPVLQAALGARHGVLLVEGGQVYSFGELPWKQNQTSSAEPILE  
 AVLSEQRVV FVAAGSAHSGVVTE DGGVHMWGENVHGQCGLLGLSVIPNTPVGVLDSEATPPQTVKILEVACGDQHTLAL  
 SAKHEVWAWGSGCQLGLNTSTFPVWKPQKVDHLSGRHVLQVACGSAHSVALVRCLPPPQEPRKPPQDKCGQCHQLLYTM  
 T  
 DKEDHVIISDGHHCPLGVEMDSTEIKSAVEGSPDPGKPGKSSPTEPVPCMSTQISKSP TSSNISESTRPPESTLPFELQN  
 QVPAYCQESIEAPVEDSAAHEAPAAAGEVCVEASENSIPEPDSRSSGKSPYPDEQAVKAYLKRLSDHALAEHTIKTSST  
 IHS AQLSGDPANLFASEPLIPVAQSVTPMGSALNNLVVSCASAVGERVVSTYEALSLRKVIGYWVPGEGRERVEERLRLE  
 ESMQGGKSSSLGDIREEEAELSRRLSLPGLLSQVSPRLLRRTSRPRMRAVPLASGGIPETDAHLPSLQTEVWSWGQGQDG  
 QLGHGDLLPRLQPD CVKSLNGKEVLKVAAGAHSLALTAQSQVFSWGCNTSGQLGHMESPTTFPQLTKLSDGIRVWDIGA  
 GLQHTLLLADGDCIQPILYYSGQQVKEVPEPTEEEEQTAEYTQQPVLLPFCMNLGYVSSVYAGGRTCAALTDCNVMGFI  
 SLHELAAAERKYYCKLSNIKSLLLQPLLKLDLSSALGQSSAGLLQNLIGRMSRLSQLTGQNSASLTSFLQRSRDIRGLV  
 ILEDAHLFLD TYSEYSSAVGDLLVMGGFQALVKPCHDVFGKGAEVVQRLSECSEEGTLADVL AHLFYLPKHLHEYGR L  
 LLKLATCYEVSSVDYQKLQDACSKFESMALHLKRRRKEAEYTLHFWKSFP GKMTDSL RKPSRR LICESSNKAL TLQ NAGR  
 FSVNWFILFNDALVHAQGMVPYKSLFSTHHIFPLATLWVEPISEESTGVYGLKVTSP EESFALLASSPAEKAKWLR SINQ  
 AVEQALSGLGHDGIPPSTGMTQRADPPISRTASYTFYKDSRLKDAKYDGRWVSGKPHGRGVVKWPDGRMYTGTFTKNGFED

GFGDYVVSNTLNSCDHYQGQWKDGKMHGFGTFRYASGEVYEGSFQDNMRHGHGMLRSGKLNSTSPSVFIGQWQYDKK  
 SG  
 YGVFDDITRGEKYMGMWLDDQRQGNVVTQFGLYYEGAFSNNKMMGTGVLLSEDDTTFEGEFLEDWTLNGKGVLTMP  
 NG  
 DYIEGSFCGVWGTGLKMSGSYKPSLYSDKEKGHALKLGR LAVHSEEKWKAVFLECWNRLGCDSPVQGGQTTTAWDNIAI  
 ALTANLRQQRDSPELLSRSHHKTLESLECIQHVGPVTLEVYHTIRRYLVKACDTPLHPLGRLVETLVSVYRMTYVGVGA  
 NRRLLPQAVNEITSYLSRIFQLVRFLFPELPEEGSLADPPKEKVGTDADGKLLESPKPGCVVSSSALLLPVLLPRLYPP  
 LFTLYALEKEKEDDVYWEVLRNLKQPD LALLAFLGVQKFWPVTVTIHGEKQQVLSSTKDACFASAVETLQQISTTFTP  
 SDKLQVIQLTFEETQEVLALLKQDFLWSMDDLFPVFLFVVLRARIRNLGSEVSLIEDLMDPCVQHGEHGIMFTTLKACY  
 YQIQHEKVT  
 >XP\_009300451.1 alsin isoform X2 [Danio rerio]  
 MEKLISSEGDSSGERGLLHTWKGYSTAPERVLLSRPVLQAALGARHGVLLVEGGQVYSFGELPWKQNQTSSAEPILE  
 AVLSEQRVVFVAAGSAHSGVVTEDGGVHMWGENVHGQCGLLGLSVIPNTPVGVLDSEATPPQTVKILEVACGDQHTLAL  
 SAKHEVWAWGSGCQLGLNTSTFPVWKPQKVDHLSGRHVLQVACGSAHSVALVRCLPPPQEPRKPPQDKCGQCHQLLYTM  
 T  
 DKEDHVIISDGHHCPLGVEMDSTEIKSAVEGSPDPGKPGKSSPTEPVPCMSTQISKSPSSNISSESTRPPESTLPFELQN  
 QVPAYCQESIEAPVEDSAAHEAPAAAGEVCVEASENSIPEPDCRSSGKSPYPDEQAVKAYLKR LSDHALAEHTIKTSST  
 IHS AQLSGDPANLFASEPLIPVAQSVTPMGSALNNLVVSCASAVGERVVSTYEALSLRKVIGYWVPGEGRERVEERLRLE  
 ESMQGGKSSSLGDIREEEAELSRRLSLPGLLSQGTHALLLHPVSRFLSPRLRRTSRPRMRAVPLASGGIPETDAHLPS  
 LQTEVWSWGQGQDGLGHGDL LPR LQPD CVKSLNGKEVLKVAAGAHSLALTAQSQVFSWGCNTSGQLGHMESPTTFPQ  
 L  
 TKLSDGIRVWDIGAGLQHTLLLADGDCIQPILYYSGQQVKEVPEPTEEEEQTA EYTQQPVLLPFCMNLGYVSSVYAGGRT  
 CAAL TDCNVMGFIASLHELAAAERKYYCKLSNIKSLLLQPLLKLDLSSALGQSSAGLLQNLIGRMSRLSQLTGQNSASL  
 TSFLQRSRDIRGLVILED AHLFLDYSEYSSAVGDLLVMGGFQALVKPCHDVFGKGA EVVQRLSECSEEGTLADVL AHL  
 FYLPIKHLHEYGRLLLKLATCYEVSSVDYQKLQDACSKFESMALHLKRRRKEA EYTLHFWKSFPGKMTDSL RKPSRR LIC  
 ESSNKALTLQNAGRFSVNWFILFNDALVHAQGMVPYKSLFSTHHIFPLATLWVEPISEESTGVYGLKVTSP EESFALLAS  
 SPAEKAKWLRSINQAVEQALSGLGHDGIPPSTGMTQRADPPISRTASYTFYKDSRLKDAKYDGRWVSGKPHGRGVVKWPD  
 GRMYTGTFTKNGFEDGFGDYVVSNTLNSCDHYQGQWKDGKMHGFGTFRYASGEVYEGSFQDNMRHGHGMLRSGKLNST  
 SP  
 SVFIGQWQYDKKSGYGVFDDITRGEKYMGMWLDDQRQGNVVTQFGLYYEGAFSNNKMMGTGVLLSEDDTTFEGEFLE  
 D  
 WTLNGKGVLTMPNGDYIEGSFCGVWGTGLKMSGSYKPSLYSDKEKGHALKLGR LAVHSEEKWKAVFLECWNRLGCD S  
 P

VQGQTTTAWDNIAIALTANLRQQRDSPELLSRSHHKTLESLECIQHVGPVTLEVYHTIRRYLVKACDTPLHPLGRLVET  
LVSVMYRMTYVGVGANRRLLPQAVNEITSYLSRIFQLVRFLPELPEEGGSLADPPKEKVGTDADGKLLESPKPGCVVSS  
ALLLPVLLPRLYPPLFTLYALEKEKEDDVYWECVLRNLKQPDALLAFLGVQKFWPVTVTIHGEKQQVLSSTKDACFAS  
AVETLQQISTTFTPSDKLQVIQLTFEITQEVALLKQDFLWSMDDLFPVFLFVVLRARIRNLGSEVSLIEDLMDPCVQH  
GEHGIMFTTLKACYYQIQHEKVT

>XP\_021333894.1 myotubularin-related protein 3 isoform X3 [Danio rerio]

MEEEGQQSLECIQANQIFPRKPPVLEEEDLQVPFPELHGEFTEYVGRAEDAVIAMSSYRLHIKFESVNNCSCEVSVPL  
QLIECVECRDMFQLHITCKDCKIVRCQFSTFEQCQEWLKRLLTA AVRPPSRIEELFSFAFHAWCVDLYTGEKEQHGDLCRP  
GDHVMSRFHNEVERMGFDTQNAWRVSEINNKYKLCSSYPQLLLVPAWITDKELNVAAFRSWKRIPAVVYRHQSTGAVIA  
RCGQPEVSWWGWRNADDEHLVQSIARACAVDSSSCKGVSNGLSREYTNADLSDVDFESSMTNSSEVETLAIQPRKLLI  
LDARSYAAAVANRAKGGGCECPEYYPNCEVVFMMGMANIHSIRKSFQSLRFLCTQMPDPANWLSALESTKWLQHL SLLKA  
SLLVSNAVDRDHRPVLVHCSGDGWDRTQPIVALAKLLLDPYRTIEGFQVLVETEWLDFGHKFADRCGHGENAEDLNERCP  
VFLQWLDCVHQLQRQFPCSFENEAFLVKLVQHTYSCLFGTFLCNSGKEREDRRIQERTCSVWSLLRAANRSFGNMLYSS  
HSETVLHPVCHVRNLMLWTAVYLPSSSPTTPSDDSCAPYPAPGANPEDQPLGRRPKTRSFNLP SACEVGNPLTSNRRSS  
DPSLNEKWQDHRRSLELNIGAGTDGAASPEPDERVNGQTMVGIMGTFSNGGTENGEGLKDVRLPMIDGVDEAELTVGVAV  
GQMENILQEATKDESAPDTRSVAKPNETSAVNGKTDDIAQEGRTEDDLESKSLEDGNVNGHCSEDGNSEASSALSQDTSE  
SQDSEEIEKCTTQEDDSSCNPTILTPNGLRTLNGHGV EPSIEQAEKRLSLESSTETLTEDLGVRPESLGPLSIPPLK  
ALAESSCLKQGLRTAARTLNNTPKRASLSAFPASTDLLHPMCNGDSPDPEPSTPRTNGERATLSRQVSLASCSLTLHA  
RGTCSHHRCLHLGFLGRPSFSPPEPPSSSSRSHLDDDGLTLHTDAIQRLRQIEAGHQLEVEALKRQVQELWSRLESHA  
AGMLRLNGDIGDEVTSITDSDFNLEPNCLSRCSTELFSEASWEQVDKQDTEVTRWYPDHLAAQCYGCERGFWLATRKHHC  
RNCGNVFCGSCCDQKIPVPSQQLFEPSRVCRSCFSNLQPPAPPLDLELDKPITASSN

>NP\_957158.2 myotubularin-related protein 3 [Danio rerio]

MEEEGQQSLECIQANQIFPRKPPVLEEEDLQVPFPELHGEFTEYVGRAEDAVIAMSSYRLHIKFESVNVPLQLIECVE  
CRDMFQLHITCKDCKIVRCQFSTFEQCQEWLKRLLTA AVRPPSRIEELFSFAFHAWCVDLYTGEKEQHGDLCRPGDHVMSR  
FHNEVERMGFDTQNAWRVSEINNKYKLCSSYPQLLLVPAWITDKELNVAAFRSWKRIPAVVYRHQSTGAVIARCGQPEV  
SWWGWRNADDEHLVQSIARACAVDSSSCKGVSNGLSREYTNADLSDVDFESSMTNSSEVETLAIQPRKLLILDARSYA  
AAVANRAKGGGCECPEYYPNCEVVFMMGMANIHSIRKSFQSLRFLCTQMPDPANWLSALESTKWLQHL SLLKASLLVNA  
VDRDHRPVLVHCSGDGWDRTQPIVALAKLLLDPYRTIEGFQVLVETEWLDFGHKFADRCGHGENAEDLNERCPVFLQWLD  
CVHQLQRQFPCSFENEAFLVKLVQHTYSCLFGTFLCNSGKEREDRRIQERTCSVWSLLRAANRSFGNMLYSSHSETVLH  
PVCHVRNLMLWTAVYLPSSSPTTPSDDSCAPYPAPGANPEDQPLGRRPKTRSFNLP SACEVGNPLTSNRRSSDPSLNEK  
WQDHRRSLELNIGAGTDGAASPEPDERVNGQTMVGIMGTFSNGGTENGEGLKDVRLPMIDGVDEAELTVGVAVGQMENIL  
QEATKDESAPDTRSVAKPNETSAVNGKTDDIAQEGRTEDDLESKSLEDGNVNGHCSEDGNSEASSALSQDTSESQDSEEI  
EKCTTQEDDSSCNPTILTPNGLRTLNGHGV EPSIEQAEKRLSLESSTETLTEDLGVRPESLGPLSIPPLKALAESSC

LKQGLRTAARTLNNTPKRASLSAFPPASTDLLHPMCNGDSPDPEPSTPRTNGERATLSRQVSLASCGSLTLHARGTCSHH  
RCLHLGFLGRPSFSPPEPPSSSSSRSHLDDDGLTLHTDAIQQLRQIEAGHQLEVEALKRQVQELWSRLESHQAAGMLRLN  
GDIGDEVTSITDSDFNLEPNCLSRCSTELFSEASWEQVDKQDTEVTRWYPDHLAAQCYGCERGFWLATRKHHCRCNCGNVF  
CGSCCDQKIPVPSQQLFEPSRVCRSCFSNLQPPAPPLDLELDKPITASSN

>NP\_956162.2 hepatocyte growth factor-regulated tyrosine kinase substrate [Danio rerio]

MGKGGGTFERLLEKATSQLLLETDWESILQICDLIRQGDTQAKYAIGAIAKKLNDKNPHVALYALEVLESVVKNCGQTIH  
DEVASKQTMEELKELFKKQPEPNVKNKILYLIQAWAHAFRNEPKYKVVQDTYQIMKVEGHVFPEFKESDAMFAAERAPDW  
VDAEECHRCRVQFGVMTRKHHCACGQIFCGKCSSKYSTIPKFGIEKEVRVCEPCFEILNKKAEGKAPSTGPSELPPPEYL  
TSPLSQSQSQMPPKRDEAALQEEEEELQLAIALSQSEAEKERMRQKNPYSAYPKADPTPTVTSSAPPVSTLYSSPVNSSAPS  
AEEVDPELARYLNRTYWEKKQEEVRKSPTPSAPAPVSLAEPVPVSQPVESHVPVQPINIVEQYQNGESENHEQFLKALQ  
NSVTTFNLNRMKSNHMRGRSITNDSAVLSLFQSINNMHPQLLEILNQLDEKRLYYEGLQDKLAQVRDARAALNALREEHRE  
KLRRAAEEAERQRQIQLAQKLEIMRQKKQEYLEMQRQLAIQRLQEQEKERQMRLEQQKHTIQMRAQMPAFSLPYAQMQSL  
PPNVAGGVVYPPAGPPSYPGTFSPSGSVEGSPMHGVYMNQAGQTAAGGPYQAMPPDPNMVNAYMYQTAGNSGQPAAPGQ  
A

PPTTTTPAYTNYQPTPTQGYQNVVSQAQSLPPMSQAAPTNGIAYMGYQQYNMQNMMSALPGQDPNMPPQQPYMPGQQPMY  
Q

QMAPPGGPQQQSQQQQQPPPPPQAPPGSAEAQLISFD

>XP\_021325300.1 hepatocyte growth factor-regulated tyrosine kinase substrate isoform X8 [Danio rerio]

MGKGGGTFERLLEKATSQLLLETDWESILQICDLIRQGDTQAKYAIGAIAKKLNDKNPHVALYALEVLESVVKNCGQTIH  
DEVASKQTMEELKELFKKQPEPNVKNKILYLIQAWAHAFRNEPKYKVVQDTYQIMKVEGHVFPEFKESDAMFAAERAPDW  
VDAEECHRCRVQFGVMTRKHHCACGQIFCGKCSSKYSTIPKFGIEKEVRVCEPCFEILNKKAEGKAPSTGPSELPPPEYL  
TSPLSQSQSQMPPKRDEAALQEEEEELQLAIALSQSEAEKERMRQKNPYSAYPKADPTPTVTSSAPPVSTLYSSPVNSSAPS  
AEEVDPELARYLNRTYWEKKQEEVRKSPTPSAPAPVSLAEPVPVSQPVESHVPVQPINIVEQYQNGESENHEQFLKALQ  
NSVTTFNLNRMKSNHMRGRSITNDSAVLSLFQSINNMHPQLLEILNQLDEKRLYYEGLQDKLAQVRDARAALNALREEHRE  
KLRRAAEEAERQRQIQLAQKLEIMRQKKQEYLEMQRQLAIQRLQEQEKERQMRLEQQKHTIQMRAQMPAFSLPYAQMQSL  
PPNVAGGVVYPPAGPPSYPGTFSPSGSVEGSPMHGVYMNQAGQTAAGGPYQAMPPDPNMVNAYMYQTAGNSGQPAAPGQ  
A

PPTTTTPAYTNYQPTPTQGYQNVVSQAQSLPPMSQAAPTNGIAYMGYQQYNMQNMMSALPGQDPNMPPQQPYMPGQQPMY  
Q

QVSNYMAPPGGPQQQSQQQQQPPPPPQAPPGSAEAQLISFD

>XP\_021325297.1 hepatocyte growth factor-regulated tyrosine kinase substrate isoform X7 [Danio rerio]

MGKGGGTFERLLEKATSQLLLETDWESILQICDLIRQGDTQAKYAIGAIAKKLNDKNPHVALYALEVLESVVKNCGQTIH  
DEVASKQTMEELKELFKKQPEPNVKNKILYLIQAWAHAFRNEPKYKVVQDTYQIMKVEGHVFPEFKESDAMFAAERAPDW

VDAEECHRCRVQFGVMTRKHHCRACGQIFCGKCSSKYSTIPKFGIEKEVRVCEPCFEILNKKAEGKAPSTGPELPPPEYL  
TSPLSQSQSMPPKRDEAALQEEEEELQLAIALSQSEAEKERMRQKNPYSAYPKADPTPTVTSSAPPVSTLYSSPVNSSAPS  
AEEVDPELARYLNRTYWEKKQEEVRKSPTPSAPAPVSLAEPVPVSQPVESHVPVQPINIVEQQYQNGESEENHEQFLKAL  
QNSVTTFLNRMKSNHMRGRSITNDSAVLSLFQSINNHPQLLEILNQLDEKRLYYEGLQDKLAQVRDARAALNALREEHR  
EKLRRAAEEAERQRQIQLAQKLEIMRQKKQEYLEMQRQLAIQRLQEQEKERQMRLEQQKHTIQMRAQMMPAFSLPYAQMMS  
LPPNVAGGVVYPPAGPPSYPGTFSPSGSVEGSPMHGVYMNQAGQTAAGGPYQAMPPDPNMVNAYMYQTAGNSGQPAAPG  
Q  
APPTTTPAYTNYQPTPTQGYQNVVSQAQSLPPMSQAAPTNGIAYMGYQQYNMQNMMSALPGQDPNMPPQQPYMPGQQPM  
Y  
QQVSNYMAPPGGPQQQSQQQQQPPPPPQAPPGSAEAQLISFD  
>XP\_021325293.1 hepatocyte growth factor-regulated tyrosine kinase substrate isoform X6 [Danio rerio]  
MGKGGGTFERLLEKATSQLLLETDWESILQICDLIRQGDTQAKYAIGAIAKKLNDKNPHVALYALEVLESVVKNCGQTIH  
DEVASKQTMEELKELFKKQPEPNVKNKILYLIQAWAHAFRNEPKYKVVQDTYQIMKVEGHVFPEFKESDAMFAAERAPDW  
VDAEECHRCRVQFGVMTRKHHCRACGQIFCGKCSSKYSTIPKFGIEKEVRVCEPCFEILNKKAEGKAPSTGPELPPPEYL  
TSPLSQSQSVVPTESMPPKRDEAALQEEEEELQLAIALSQSEAEKERMRQKNPYSAYPKADPTPTVTSSAPPVSTLYSSPV  
NSSAPSAAEEVDPELARYLNRTYWEKKQEEVRKSPTPSAPAPVSLAEPVPVSQPVESHVPVQPINIVEQQYQNGESEENHEQ  
FLKALQNSVTTFLNRMKSNHMRGRSITNDSAVLSLFQSINNHPQLLEILNQLDEKRLYYEGLQDKLAQVRDARAALNAL  
REEHREKLRRAAEEAERQRQIQLAQKLEIMRQKKQEYLEMQRQLAIQRLQEQEKERQMRLEQQKHTIQMRAQMMPAFSLPY  
AQMMSLPPNVAGGVVYPPAGPPSYPGTFSPSGSVEGSPMHGVYMNQAGQTAAGGPYQAMPPDPNMVNAYMYQTAGNSG  
QP  
AAPGQAPPTTTPAYTNYQPTPTQGYQNVVSQAQSLPPMSQAAPTNGIAYMGYQQYNMQNMMSALPGQDPNMPPQQPYMP  
G  
QQPMYQQVSNYMAPPGGPQQQSQQQQQPPPPPQAPPGSAEAQLISFD  
>XP\_021325291.1 hepatocyte growth factor-regulated tyrosine kinase substrate isoform X5 [Danio rerio]  
MGKGGGTFERLLEKATSQLLLETDWESILQICDLIRQGDTQAKYAIGAIAKKLNDKNPHVALYALEVLESVVKNCGQTIH  
DEVASKQTMEELKELFKKQPEPNVKNKILYLIQAWAHAFRNEPKYKVVQDTYQIMKVEGHVFPEFKESDAMFAAERAPDW  
VDAEECHRCRVQFGVMTRKHHCRACGQIFCGKCSSKYSTIPKFGIEKEVRVCEPCFEILNKKAEGKAPSTGPELPPPEYL  
TSPLSQSQSVVPTESMPPKRDEAALQEEEEELQLAIALSQSEAEKERMRQKNPYSAYPKADPTPTVTSSAPPVSTLYSSPV  
NSSAPSAAEEVDPELARYLNRTYWEKKQEEVRKSPTPSAPAPVSLAEPVPVSQPVESHVPVQPINIVEQQYQNGESEENHE  
QFLKALQNSVTTFLNRMKSNHMRGRSITNDSAVLSLFQSINNHPQLLEILNQLDEKRLYYEGLQDKLAQVRDARAALNA  
LREEHREKLRRAAEEAERQRQIQLAQKLEIMRQKKQEYLEMQRQLAIQRLQEQEKERQMRLEQQKHTIQMRAQMMPAFSLP  
YAQMMSLPPNVAGGVVYPPAGPPSYPGTFSPSGSVEGSPMHGVYMNQAGQTAAGGPYQAMPPDPNMVNAYMYQTAGNS  
GQ

PAAPGQAPPTTTPAYTNYQPTPTQGYQNVVSQAQSLPPMSQAAPTNGIAYMGYQQYNMQNMMSALPGQDPNMPPQQPYM  
P

GQQPMYQQVSNYMAPPGGPQQQSQQQQQPPPPPQAPPGSAEAQLISFD

>XP\_021332790.1 FERM, RhoGEF and pleckstrin domain-containing protein 2 isoform X2 [Danio rerio]

MGEIEGSYRSLQTPAGSRLGGQHNTGISTLEPGQSLSSAMGAGGKGHNKGLQIRVQGLDEAQEFYELESKADGQLLSDV  
FRRINLIESDYFGLEFQNLQMNWVWLDPSKLIVKQVRRPMNTLFRLSVKFFPPDPGQLQEEFTRYLFSLQIKRDLLDGRL  
SCTENTAALLASHLVQSEIGDYDDLADREFLKMNKLLPCQEHVQEKIMELHRRHTGQTPAESDFQVLEIARKLEMFGVRF  
HPAADREGTKINLAVAHMGLQVFQGHKTINTFNWSKIRKLSFKRKRFLIKLHPEVHGPHQDTLEFLMGSRDQCKIFWKNC  
VEHHSFFRLLDQPQPKSKAIFFSRGSSFRYSGRTQKQLVEYVRDSGLRRTPYQRRNSKIRMSTRSLASDVPKQNLSEFND  
LRTHIPPSSITASFQSLHAPSVMRAETPNQLLHLHQTHQPLRAPSPMKQDPIKTNSQSTYAFPDSIAIDSPQLSPFND  
KGPLCLSPSFQMSTLSLPGQAPSPLQSPILNEVGTAARLDEDEEGRRKRYPTDKAYFIAKEILTERTYLKDLEVITVWFR  
SAVIKENAMPEGLMTLLFSNIDPIYEFHRGFLKEIDQRLALWEGRSNAHVKG DYQ RIGDVMLRNMCSLKEFTGYLQKHDE  
VLTELEKATKR VKKLET VYKEFELQKVCYLPLNTFLLKPIQRLMHYKLILERLCKHYSPQHRDYDDCKEALKEVAEIATQ  
LQSSLIRLENFQKLTTELQRDLIGIENLTAPGREFIREGCLYKLTKKGLQQRMFFLFSDMLLYTSKGV TATNQFKVHGQLP  
LHGMIVEESENEWSVPHCF TIYSAQRTIVVAASSKVEMNKWIEDLNMAIEMSKKCKEKS DVLLDPSLCDRSNRSSDEVSL  
EQESED DMNSSRCSLDKQSHHRANTTMHVCWHRNTSVSMSDHSLAVENQLSGYLLRKFKNSNGWQKLWVVFTNFCLFFY  
K

THQDDFPLASLPLLGYTVSTPGESDSIHKEYVFKLQFKSHVYFFRAESEYTFERWMEVIKSAASATGRMSLLVPKGPAEV  
NVGN

>XP\_002667032.4 myotubularin-related protein 4 isoform X1 [Danio rerio]

MSRSVSCSMLNCFGEEGPPSLEYIQARDLFPQKELLKEDDTLQVPFPVLQGEWVEFLGRADDAVIAISNYRLHIKFKDSI  
INVPLRLIESVESRDMFQLHIICKDSKVVRCHFSTFKQCEEWLKRLQRAITHPARLEELFALAYHAWCLGANTDDEDQHL  
HLCRPGDHVRHRLEVEVKRMGFDMQNAWRVSDINTNYKLCSSYPQKLLVPVWITDKELESVASFRSWKRIPVVVYRHQRN  
GAVIARCSQPEISWWGWRNTEDEYLVTIAKACQLDGGSRAGRSRGDGPDSDSDFDSSLTGCPAPDSSAAAQKLLILDAR  
SYTAAVANRAKGGGCECEEYYPNCEVMFMGMANIHSIRNSFQSLRAVCSQIPDPGNWLSALESTRWLQHLSVMLKAASLV  
CSALERDGRPVLVHCSDGWDRTQPQIVALAKILLDPFYRTIEGFQVLVETEWLDFGHKFADRCGHQENGDDVSEQCPVFLQ  
WLDCVHQLLKQFPCLFEFNEAFLVKL VQHTYSCLYGTFLCNNGKERETRNVYKRTCSIWSSLRTGNKNFNQFLYIPCHDM  
VLQPVCHTRALQLWTA VYLPSSSPCTAAEDA VEVYLSPGAGDREEFSSRSLDRLPKTRSM DNLLSACENGVTLTRTSSDP  
NLNKHCP EGRPSLEPNPPLILAPDAGALREELNHQSLPSEQLEDDQGV EPCLTTQPLPSIPRPLAIEQAPPPLISNQSP  
PQITHSPLPPSDVHVRTAEITSTASLCNGFAHVENTRESSSDSVETLTEQSVCEVVKKPDEV RN GALVLLRERPHAVEYA  
KTARRLISTSPDL SLLGSQWDSVQGMVQSACGGAIQHGSYHGRR LANKLLRAQAGSSVGGGPCCHRDPLRAPGSP IQS  
GWFS AVKSSGYAALCSSLGPSLRQLLPSHSCPSAGSSAYLDDDGLPVALDAVQQRLRQIEASYKQEVEVLRRQVRQLQL  
KLESKQFCTPPSEPDVDYEDDITCLRESDGSEDSLSRSSEDRFSEGSWDRVERKDTEVTRWVPDHMASHCFNCDFEW

IAKRRHHCRNCGNVFCKDCCHLKLPIPDQQLYDPVLVCNTCYDLLLESRTRELRSQQLKKAATASS

>XP\_021332402.1 myotubularin-related protein 4 isoform X3 [Danio rerio]

MFPGVDSEMSVPLRLIESVESRDMFQLHIICKDSKVVRCHFSTFKQCEEWLKRLQRAITHPARLEELFALAYHAWCLGAN  
TDDDEDQHLHLCRPGDHVRHRLVEVEVKRMGFDQMNAWRVSDINTNYKLCSSYPQKLLVPVWITDKELESVASFRSWKRIPV  
VVYRHQRNGAVIARCSQPEISWWGWRNTEDEYLVTSLIAKACQLDGGSRAGRSRGDGPDSDFSDFSSLTGCPAPDSSAAAQ  
KLLILDARSYTA AVANRAKGGGCECEEYYPNCEVMFMGMANIHSIRNSFQSLRAVCSQIPDPGNWLSALESTRWLQHLSV  
MLKAASLVCSALERDGRPVLVHCSDGWDRTTPQIVALAKILLDPFYRTIEGFQVLVETEWLDFGHKFADRCGHQENGDDVS  
EQCPVFLQWLDCVHQLLKQFPCLFEFNEAFLVKLVQHTYSCLYGTFLCNNGKERETRNVYKRTCSIWSLLRTGNKNFQNF  
LYIPCHDMVLQPVCHTRALQLWTAVYLPSSSPCTAAEDAVEVYLSPGAGDREEFSSRSLDRLPKTRSMNLLSACENGVT  
LTRTSSDPNLNKHCPGRPSLEPNPPLILAPDAGALREELNHQSLPSEQLEDDQGVEPCLTTQPLPSIPRPLAIEQAPP  
PLISNQSPQITHSPLPPSDVHVRTAEITSTASLCNGFAHVENTRESSSDSVETLTEQSVCEVKKPDEVNRNGALVLLRE  
RPHAVEYAKTARRLISTSPLPDL SLLGSQWDSVQGMVQSACGGAIQHGSYHGRR LANKLLRAQAGSSVGGGPCCHRDPLR  
APGSPIQSGWFS AVKSSGYAALCSSLGPSLRQLLPSHSCPSAGSSAYLDDDGLPVALDAVQQRLRQIEASYKQEVEVLR  
RQVRQLQLKLESKQFCTPPSEPDVDYEDDITCLRESDGSEDSDSLSSRSEDRFSEGSWDRVERKDTEVTRWVPDHMASHC  
FNCDCEFWIAKRRHHCRNCGNVFCKDCCHLKLPIPDQQLYDPVLVCNTCYDLLLESRTRELRSQQLKKAATASS

>XP\_009299405.1 myotubularin-related protein 4 isoform X2 [Danio rerio]

MGEEGPPSLEYIQARDLFPQKELLKEDDTLQVPFPVLQGEWVEFLGRADDAVIAISNYRLHIKFKDSIINVPLRLIESVE  
SRDMFQLHIICKDSKVVRCHFSTFKQCEEWLKRLQRAITHPARLEELFALAYHAWCLGANTDDDEDQHLHLCRPGDHVRHRL  
LEVEVKRMGFDQMNAWRVSDINTNYKLCSSYPQKLLVPVWITDKELESVASFRSWKRIPVVVYRHQRNGAVIARCSQPEI  
SWWGWRNTEDEYLVTSLIAKACQLDGGSRAGRSRGDGPDSDFSDFSSLTGCPAPDSSAAAQKLLILDARSYTA AVANRAK  
GGCECEEYYPNCEVMFMGMANIHSIRNSFQSLRAVCSQIPDPGNWLSALESTRWLQHLSVMLKAASLVCSALERDGRPVL  
VHCSDGWDRTTPQIVALAKILLDPFYRTIEGFQVLVETEWLDFGHKFADRCGHQENGDDVSEQCPVFLQWLDCVHQLLKQF  
PCLFEFNEAFLVKLVQHTYSCLYGTFLCNNGKERETRNVYKRTCSIWSLLRTGNKNFQNF LYIPCHDMVLQPVCHTRALQ  
LWTAVYLPSSSPCTAAEDAVEVYLSPGAGDREEFSSRSLDRLPKTRSMNLLSACENGVTLTRTSSDPNLNKHCPGRPS  
LEPNPPLILAPDAGALREELNHQSLPSEQLEDDQGVEPCLTTQPLPSIPRPLAIEQAPPPLISNQSPQITHSPLPPSD  
VHVRTAEITSTASLCNGFAHVENTRESSSDSVETLTEQSVCEVKKPDEVNRNGALVLLRERPHAVEYAKTARRLISTSPL  
PDL SLLGSQWDSVQGMVQSACGGAIQHGSYHGRR LANKLLRAQAGSSVGGGPCCHRDPLRAPGSPIQSGWFS AVKSSGYA  
ALCSSLGPSLRQLLPSHSCPSAGSSAYLDDDGLPVALDAVQQRLRQIEASYKQEVEVLR RQVRQLQLKLESKQFCTPPS  
EPDVDYEDDITCLRESDGSEDSDSLSSRSEDRFSEGSWDRVERKDTEVTRWVPDHMASHCFNCDCEFWIAKRRHHCRNCG  
NVFCKDCCHLKLPIPDQQLYDPVLVCNTCYDLLLESRTRELRSQQLKKAATASS

>XP\_005155593.1 zinc finger FYVE domain-containing protein 16 isoform X3 [Danio rerio]

MDSYFKA AVCDLKD LDDFELS AEELESKPGTYVSPPCPDSTLIPGRFIPEQHTVPQTLPDVNALHYGLTSQSIDSNQKD  
SYSNEWPLTGVDLLSSVDSRGIKSSAPPCPDRSLKPVC DLVNDTGSANLQQADSQEDFKELDIPDVQSTEGLLVDFESPE



DLSKPSHSEILKRDSEINCNSLSLLDVILPVVGEPYTSSSITLLETSSCPEASNSNGQNDRPWSQMDEDDVCNTCPSTT  
 EENISAFSEEHAVSLQPDSTSEDVRNPEDLTGSPTSEKESSLCLPMAVSMCGSLVATLDPQKAAVVETKDEAELETKSA  
 IQEAEELTLPLEEPVPPFSSSRPDSSPEDEPEIVQIMSNPAAAGHYPERNFKRTLSPDKLTCRDLGASNPSPSYSESPN  
 YSYEFGIANDYLPESDQTVMMVTDEELDAFLMGQGVKINPDAAVEKFSDDGFSEFNGNAERDGFLEELQSCKVETFASP  
 ESDGSQYLEESEGSNVSSSSQDSSPLRADSTQTITHETVTSPVEIQSVCSNPQESTYGGARPKQLSNQTVRPPSERHRIS  
 HAEADVGGSSANGSQVSPNQDEINCEPPSYQQYDSSYGCDDELSEPPYPGEMLEDGESSVDLSGHGAEGLGSKQPPWVPDS  
 EAPNCMNCMQKFTFTKRRHHCRACGKVYCASCCNRKCLKYLDKEARVCVICHVTIQRGFPREQKHVWFADGILPNGEVA  
 DTTKLSVQTRRSSQESSPVTDPDPAPDDKFPDEREESVGGRS DSPVEASRPPVRGPWDYGLLCGVGNCVQRDASLVPEDD  
 DGLPPLLITGEEEEEGDLLVEERPAACQILLLEEGGPQPLTFVLNANLLVNVKIVTYCGKRCWCLSSNGLQGVGQKELV  
 FIIIECLPEENSLPRDVFNLYVSIYQDAQKGKGFIEHLGNVTFTDSFLGSKDHGGVLFATFQPLEGLALPQVSFLCGVLI  
 QKLEVPWAKVFPLRLLLALGAKYSVYPCPLMSIRFRESVFKETGHTIMNLLTDLRNYQYSLPVVESLRVHMEMGNSYIEI  
 PKSRFNEMLKVVNSSNEHVISFGACFSTEADSHLVCIQNEDGSYQTSANSIPGKTRRVTGASFVVFNGALKASSGFIKS  
 SIVEDGLMVQIPPETMEGLRQALRDQNDQFQPCGKTDSEETRENVNVRWVDWTAPVNAGVTSPVDGKSLEGVSSVKIQD  
 SEFEMDGRITRCTEVFYLLKSSDVSLPAILTSSAQFQREIATASCAALCPHLSVLMANGFNSLALRVSTDSDMVEYQAGS  
 SGRLLPQKYMNDLDGALIPVIHGGSSCVPHQAMDMEFFFYISLSI

>XP\_021325289.1 hepatocyte growth factor-regulated tyrosine kinase substrate isoform X4 [Danio rerio]

MGKGGGTFERLLEKATSQLLLETDWESILQICDLIRQGDTQAKYAIGAIAKKLNDKNPHVALYALEVLESVVKNCGQTIH  
 DEVASKQTMEELKELFKKQPEPNVKNKILYLIQAWAHAFRNEPKYKVVQDTYQIMKVEGHVFPEFKESDAMFAAERAPDW  
 VDAEECHRCRVQFGVMTRKHHCRACGQIFCGKCSSKYSTIPKFGIEKEVRVCEPCFEILNNHPSLSPPPRKAEGKAPSTG  
 PSELPEYLTSPLSQSQSQMPKRDEAALQEEEEELQALIALSQSEAEKERMRQKNPYSAYPKADPTPTSSAPPVSTLYS  
 SPVNSSAPSAEEVDPELARYLNRTYWEKKQEEVRKSPTPSAPAPVSLAEPVPVSQPVESHVPVQPINIVEQQYQNGESEE  
 NHEQFLKALQNSVTTFNLNRMKSNHMRGRSITNDSAVLSLFQSINNMMHPQLLEILNQLDEKRLYYEGLQDKLAQVRDARAA  
 LNALREEHREKLRRAAEEAERQRQIQLAQKLEIMRQKKQEYLEMQRQLAIQRLQEKEKERQMRLEQQKHTIQMRAQMPAF  
 SLPYAQMQLPPNVAGGVVYPAGPPSYPGTFSPSGSVEGSPMHGVYMNQAGQTAAGGPYQAMPPDPNMVNAYMYQTAG  
 N

SGQPAAPGQAPPTTTPAYTNYQPTPTQGYQNVVSQAQSLPPMSQAAPTNGIAYMGYQQYNMQNMMSALPGQDPNMPPQQ  
 P

YMPGQQPMYQQVSNYMAPPGGPQQQSQQQQQPPPPPPQAPPGSAEAQLISFD

>XP\_005164430.1 hepatocyte growth factor-regulated tyrosine kinase substrate isoform X3 [Danio rerio]

MGKGGGTFERLLEKATSQLLLETDWESILQICDLIRQGDTQAKYAIGAIAKKLNDKNPHVALYALEVLESVVKNCGQTIH  
 DEVASKQTMEELKELFKKQPEPNVKNKILYLIQAWAHAFRNEPKYKVVQDTYQIMKVEGHVFPEFKESDAMFAAERAPDW  
 VDAEECHRCRVQFGVMTRKHHCRACGQIFCGKCSSKYSTIPKFGIEKEVRVCEPCFEILNNHPSLSPPPRKAEGKAPSTG  
 PSELPEYLTSPLSQSQSQVVPTESMPPKRDEAALQEEEEELQALIALSQSEAEKERMRQKNPYSAYPKADPTPTSSAPP

VSTLYSSPVNSSAPSAAEVDPELARYLNRITYWEKKQEEVRKSPTPSAPAPVSLAEPVPVSQPVESHVPVQPINIVEQQYQ  
NGESENHEQFLKALQNSVTTFLNRMKSNHMRGRSITNDSAVLSLFQSINNHPQLLEILNQLDEKRLYYEGLQDKLAQV  
RDARAALNALREEHREKLRRAAEEAERQRQIQLAQKLEIMRQKKQEYLEMQRQLAIQRLQEKEKERQMRLEQQKHTIQMR  
AQMPAFSLPYAQMQSLPPNVAGGVVYPPAGPPSYPGTFSPSGSVEGSPMHGVYMNQAGQTAAGGPYQAMPPDPNMVNAY  
M  
YQTAGNSGQPAAPGQAPPTTTPAYTNYQPTPTQGYQNVVSQAQSLPPMSQAAPTNGIAYMGYQQYNMQNMMSALPGQDP  
N  
MPPQQPYMPGQQPMYQQMAPPGGPQQQSQQQQQPPPPPPQAPPGSAEAQLISFD  
>XP\_021325286.1 hepatocyte growth factor-regulated tyrosine kinase substrate isoform X2 [Danio rerio]  
MGKGGGTFERLLEKATSQLLLETDWESILQICDLIRQGDTQAKYAIGAIIKKLNDKNPHVALYALEVLESVVKNCGQTIH  
DEVASKQTMEELKELFKKQPEPNVKNKILYLIQAWAHAFRNEPKYKVVQDTYQIMKVEGHVFPEFKESDAMFAAERAPDW  
VDAEECHRCRVQFGVMTRKHHCRACGQIFCGKCSSKYSTIPKFGIEKEVRVCEPCFEILNNHPSLSPPPRKAEGKAPSTG  
PSELPPEYLTSPLSQQSQVVPTESMPPKRDEAALQEEEEELQLAIALSQSEAEKERMRQKNPYSAYPKADPTPTVTSSAPP  
VSTLYSSPVNSSAPSAAEVDPELARYLNRITYWEKKQEEVRKSPTPSAPAPVSLAEPVPVSQPVESHVPVQPINIVEQQYQ  
NGESENHEQFLKALQNSVTTFLNRMKSNHMRGRSITNDSAVLSLFQSINNHPQLLEILNQLDEKRLYYEGLQDKLAQVR  
DARAALNALREEHREKLRRAAEEAERQRQIQLAQKLEIMRQKKQEYLEMQRQLAIQRLQEKEKERQMRLEQQKHTIQMRA  
QMPAFSLPYAQMQSLPPNVAGGVVYPPAGPPSYPGTFSPSGSVEGSPMHGVYMNQAGQTAAGGPYQAMPPDPNMVNAYM  
Y  
QTAGNSGQPAAPGQAPPTTTPAYTNYQPTPTQGYQNVVSQAQSLPPMSQAAPTNGIAYMGYQQYNMQNMMSALPGQDPN  
M  
PPQQPYMPGQQPMYQQVSNYMAPPGGPQQQSQQQQQPPPPPPQAPPGSAEAQLISFD  
>XP\_021325285.1 hepatocyte growth factor-regulated tyrosine kinase substrate isoform X1 [Danio rerio]  
MGKGGGTFERLLEKATSQLLLETDWESILQICDLIRQGDTQAKYAIGAIIKKLNDKNPHVALYALEVLESVVKNCGQTIH  
DEVASKQTMEELKELFKKQPEPNVKNKILYLIQAWAHAFRNEPKYKVVQDTYQIMKVEGHVFPEFKESDAMFAAERAPDW  
VDAEECHRCRVQFGVMTRKHHCRACGQIFCGKCSSKYSTIPKFGIEKEVRVCEPCFEILNNHPSLSPPPRKAEGKAPSTG  
PSELPPEYLTSPLSQQSQVVPTESMPPKRDEAALQEEEEELQLAIALSQSEAEKERMRQKNPYSAYPKADPTPTVTSSAPP  
VSTLYSSPVNSSAPSAAEVDPELARYLNRITYWEKKQEEVRKSPTPSAPAPVSLAEPVPVSQPVESHVPVQPINIVEQQYQ  
NGESENHEQFLKALQNSVTTFLNRMKSNHMRGRSITNDSAVLSLFQSINNHPQLLEILNQLDEKRLYYEGLQDKLAQV  
RDARAALNALREEHREKLRRAAEEAERQRQIQLAQKLEIMRQKKQEYLEMQRQLAIQRLQEKEKERQMRLEQQKHTIQMR  
AQMPAFSLPYAQMQSLPPNVAGGVVYPPAGPPSYPGTFSPSGSVEGSPMHGVYMNQAGQTAAGGPYQAMPPDPNMVNAY  
M  
YQTAGNSGQPAAPGQAPPTTTPAYTNYQPTPTQGYQNVVSQAQSLPPMSQAAPTNGIAYMGYQQYNMQNMMSALPGQDP  
N

MPPQQPYMPGQQPMYQQVSNYMAPPGGPQQQSQQQQQPPPPQAPPGSAEAQLISFD

>XP\_005155592.1 zinc finger FYVE domain-containing protein 16 isoform X1 [Danio rerio]

MDSYFKA AVCDL DKLLD DFELSAEELES KPGTYVSPPCPDSTLIPGRFIPEQHTVPQTL PDVNALHYGLTSQSIDSNQKD  
SYSNEWPLTGVDLLSSVDSRGIKSSAPPCPDRSLKPVC DLVNDTGSANLQQADSQEDFKELDIPDVQSTEGLLVDFESPE  
DL SKPSHSEILKRDSEINCNSLSLLDVILPVVGEPYTSSSITLLETES SCPEASNSNGQNDRPWSQMDEDDVCNTCPSTT  
EENISAFSEEHAVSLQPDSTSEDVRNPEDLTGSPTSEKESLSCLPMAVSMCGSLVATLDPQKAAVVETKDEAELETKSA  
IQEAEELTLPLEEPVPPFSSSRPDSSPEDEPEIVQIMSNPAAAGHYPERNFKRTLSPDKLTCDRLGASNPSPSYSESPN  
YSYEFGIANDYLPESDQTVMMVTDEELDAFLMGQGVKINPDAAVEKFSDDGFSEFNGNAERDGF LDEELQ SCKVETFASP  
ESDGSQYLEESEG SNVSSSSQDSSPLRADSTQTITHETVTSPVEIQSVCS PNQESTYGGARPKQLSNQTVRPPSERHRIS  
HAEADVGG SANGSQVSPNQDEINCEPPSYQQYDSSYGCDLSEPPYPGEMLEDGESSVDLSGHGAEGLGSKQPPWVPDS  
EAPNCMNCMQKFTFTKRRHHCACGKVYCASCCNRKCRLKYLDKEARVCVICHVTIQRAQAHERMMSPTGSPNPNI PSE  
YCSTIPPMQQAARAAGTLNSPPPTVMVPVSVLKHPGNDGFPREQKHVWFADGILPNGEVADTTKLSVQTRRSSQESSPVTP  
DPPAPDDKFPDEREESVGG RSDSPVEASRPPVRGPWDYGLLCGVGNCVQRDASLVPEDDDGLPPLLIITGEEEEGDLLVE  
ERPAACQILLLL EEGGPQPLTFVLNANLLVNVKIVTYCGKRCWCLSSNGLQGVGQKELVFII ECLPEENSLPRDVFNLYV  
SIYQDAQKGKFIEHLGNVTFTDSFLGSKDHGGVLF FTATFQPLEGLALPQVSFLCGVLIQKLEVPWAKVFPLRLL LALGA  
KYSVYPCPLMSIRFRESVFKETGHTIMNLLTDLRNYQYSLPVVESLRVHMEMGNSYIEIPKSRFNEMLKVVNSSNEHVIS  
FGACFSTEADSHLVCIQNEDGSYQTSANSIPGKTRRV TGASFVVFNGALKASSGFI AKSSIVEDGLMVQIPPETMEGLRQ  
ALRDQND FQIPCGKTDSEETRENVNVRWVDWTAPVNAGVTSPVDGKSLEGVSSVKIQQDSEFEMDGR TIRCTEVFYLLKS  
SDVSLPAILTSSAQFQREIATASCAALCPHLSVLMANGFN SLALRVSTDSDMVEYQAGSSGRLLPQKYMNDLDGALIPVI  
HGGSSCVPHQAMDMEFFFYISLSI

>XP\_001920918.3 zinc finger FYVE domain-containing protein 16 isoform X2 [Danio rerio]

MDSYFKA AVCDL DKLLD DFELSAEELES KPGTYVSPPCPDSTLIPGRFIPEQHTVPQTL PDVNALHYGLTSQSIDSNQKD  
SYSNEWPLTGVDLLSSVDSRGIKSSAPPCPDRSLKPVC DLVNDTGSANLQQADSQEDFKELDIPDVQSTEGLLVDFESPE  
DL SKPSHSEILKRDSEINCNSLSLLDVILPVVGEPYTSSSITLLETES SCPEASNSNGQNDRPWSQMDEDDVCNTCPSTT  
EENISAFSEEHAVSLQPDSTSEDVRNPEDLTGSPTSEKESLSCLPMAVSMCGSLVATLDPQKAAVVETKDEAELETKSA  
IQEAEELTLPLEEPVPPFSSSRPDSSPEDEPEIVQIMSNPAAAGHYPERNFKRTLSPDKLTCDRLGASNPSPSYSESPN  
YSYEFGIANDYLPESDQTVMMVTDEELDAFLMGQGVKINPDAAVEKFSDDGFSEFNGNAERDGF LDEELQ SCKVETFASP  
ESDGSQYLEESEG SNVSSSSQDSSPLRADSTQTITHETVTSPVEIQSVCS PNQESTYGGARPKQLSNQTVRPPSERHRIS  
HAEADVGG SANGSQVSPNQDEINCEPPSYQQYDSSYGCDLSEPPYPGEMLEDGESSVDLSGHGAEGLGSKQPPWVPDS  
EAPNCMNCMQKFTFTKRRHHCACGKVYCASCCNRKCRLKYLDKEARVCVICHVTIQRAQAHERMMSPTGSPNPNI PSE  
YCSTIPPMQQAARAAGTLNSPPPTVMVPVSVLKHPGFPREQKHVWFADGILPNGEVADTTKLSVQTRRSSQESSPVTPDP P  
APDDKFPDEREESVGG RSDSPVEASRPPVRGPWDYGLLCGVGNCVQRDASLVPEDDDGLPPLLIITGEEEEGDLLVEER P  
AACQILLLL EEGGPQPLTFVLNANLLVNVKIVTYCGKRCWCLSSNGLQGVGQKELVFII ECLPEENSLPRDVFNLYVSIY

QDAQKGKFIH LGNVTFTDSFLGSKDHGGVLF FTATFQPLEGLALPQVSFLCGVLIQKLEVPWAKVFPLRLLLALGAKYS  
VYPCPLMSIRFRESVFKETGHTIMNLLTDLRNYQYSLPVVESLRVHMEMGNSYIEIPKSRFNEMLKVVNSSNEHVISFGA  
CFSTEADSHLVCIQNEDGSYQTSANSIPGKTRRVTGASFVVFNGALKASSGFIKSSIVEDGLMVQIPPETMEGLRQALR  
DQND FQIPCGKTDSEETRENVNVRWVDWTAPVNAGVTSPVDGKSLEGVSSVKIQQDSEFEMDGR TIRCTEVFYLLKSSDV  
SLPAILTSSAQFQREIATASCAALCPHLSVLMANGFNSLALRVSTDSDMVEYQAGSSGRLLPQKYMNDLDGALIPVIHGG  
SSCVPHQAMDMEFFFYISLSI

>XP\_005165797.1 alsin isoform X3 [Danio rerio]

MEKLISSGEGDSSGERGLLHTWKGYSTAPERVLLSRPVLQAALGARHGVLLVEGGQVYSFGELPWKQNQTSSAEPIL  
AVLSEQRVVFVAAGSAHSGVVTEDEGGVHMWGENVHGQCGLLGLSVIPNPTPVGVLDSEATPPQTVKILEVACGDQHTLAL  
SAKHEVWAWGSGCQLGLNTSTFPVWKPQKVDHLSGRHVLQVACGSAHSVALVRCLPPPQEPRKPPQDKCGQCHQLLYTM  
T

DKEDHVIISDGHHCPLGVEMDSTEIKSAVEGSPDPGKPGKSSPTEPVPCMSTQISKSPSSNISESTRPPESTLPFELQN  
QVPAYCQESIEAPVEDSAAHEAPAAAGEVCVEASENSIPEPDSCRSSGKSPYPDEQAVKAYLKRLSDHALAEHTIKTSST  
IHSAQLSGDPANLFASEPLIPVAQSVTPMGSALNNLVVSCASAVGERVVSTYEALSLRKVIGYWVPGEGRERVEERLRLE  
ESMQGKKSSSLGDIREEEAELSRRLSLPGLLSQDNAESEVKASSNTTTEVSPRLLRRTSRPRMRAVPLASGGIPETDAH  
LPSLQTEVWSWGQGGQDQGLGHGDLLPRLQPDCVKS LNKKEVLKVAAGAHHSLALTAQSQVFSWGCNTSGQLGHMESPTT  
F

PQLTKLSDGIRVWDIGAGLQHTLLLADGDCIQPILYYSGQQVKEVPEPTEEEEQTAEYTQQPVLLPFCMNLGYVSSVYAG  
GRTCAALTD CNVMGFIASLHELAAAERKYYCKLSNIKSLLLQPLLKLDLSSALGQSSAGLLQNLIGRMSRLSQLTGQNS  
ASLTSFLQRSRDIRGLVILEDAHLFLDTYSEYSSAVGDLLVMGGFQALVKPCHDVFGKGAEVVQRLSECSEEGTLADVL  
AHLFYLPKHLHEYGRLLLKLATCYEVSSVDYQKLQDACSKFESMALHLKRRRKEAEYTLHFWKSFP GKMTDSL RKPSRR  
LICESSNKALTLQNAGRFSVNWFILFNDALVHAQFSTHHIFPLATLWVEPISEESTGVYGLKVTSP EESFALLASSPAEK  
AKWLR SINQAVEQALSGLGHDGIPPSTGMTQRADPPISRTASYTFYKDSRLKDAKYDGRWVSGKPHGRGVV KWPDGRMYT  
GTFKNGFEDGFGDYVVS NKTLNSCDHYQQQWKDGKMHGFGTFRYASGEVYEGSFQDNMRHGHGMLRSGKLNSTSPSVFI  
G

QWQYDKKSGYGVFDDITRGEKYMGMWLDDQRQGNGVVVTQFGLYYEGA FSNKMMGTGVLLSEDDTTFEGEFLEDWTL  
NG

KGVLTMPNGDYIEGSFCGVWGTGLKMSGSYKPSLYDS DKEKGHALKLGR LAVHSEEKWKAVFLECWNRLGCDS PVQQG  
T

TTAWDNIAIALTANLRQQRDSPELLSRSHHKTLESLECIPQHVG PVTLEVYHTIRRYLVKACDTPLHPLGRLVETLVSVY  
RMTYVGVGANRRLLPQAVNEITSYLSRIFQLVRFLFPELPEEGGSLADPPKEKVGTDADGKLLES PKPGCVVSSSALLP  
VLLPRLYPPLFTLYALEKEKEDDVYWECVLR LNKQPD LALLAFLGVQQKFWPVTVTIHGEKQQVLSSTKDACFASAVETL  
QQISTTFTPSDKLQVIQLTFEITQEV LALLKQDFLWSMDDLFPVFLFVVLRARIRNLGSEVSLIEDLMDPCVQHGEHGI

MFTTLKACYYQIQHEKVT

>NP\_001096142.1 rabankyrin-5 [Danio rerio]

MRTEEVQKLQKHLALLRQEYVVKMQKL VETERRCSVLAAQASVPGSSSQASDSFISRLLAIVSDLYQQEQYSDLKVKIGD  
QRLSAHKFVLAARSEIWSLANLASTSELDLSDAKPEVAMAMLRWTYTDDLELNGNDGFLIDLMKLANRFQLHLLRERCEK  
GVMSSVNVNRCIRFYQTAEELDAATLMNYCGEIIASHWDDLKEDFSTMDAQLLYKMIKSKTEYPLHKAIAKVEREDVVFL  
YLIEMDAQLPGLNELDNNGDLALDLALSCKKLESIATTLVNNKADVDMVDQSGWSLLHKAIQRGDEFASFILIRHSAQVN  
AATVGAVETPLHLVCSFSPKKHSGEVMAGMARIAEALLKAGANPNMQNSKGRTPLEAVVSGNEPVFNQLLQCKQLDLEL  
KDHEGSTALWLALQYITVASDPSVNPFEDEAPVVNGTSFDENSFAARLIQRGSNPDAPDTNGNCLMQRAAVAGSEAAAIF  
LATHGAKVNHTNWKWGETPLHTACRCGLAGLTVELLQQGANPNLQTDIALPGGVEKSQGVVSQQSPLHLAIVHNHPDVVSVI  
LEQKANALHATNNLQIIPDFSLKDSMDQTVLGLALWTGMHTIAAQLLGSGAAINDTMSDGQTLHMAIKRQDSKSAFLFL  
EHQADINVRTQEGQTALQLAISNQLPLVVDIAICTRGADMSVNEKGDPLWLALENGLEDIASTLVRHGCDATCWSSGPG  
GCQQTLLHRAIDENNEVTACFLIRSGCDVNSSRRPGPNGEDEEARDGQCPLHLAASWGLEEVAQCLLEFGANVNAQDSE  
GRAPIHVAISNQSVIIQLLISHPEIRLNIRDRQGMTPFACAMTHKNNKAAEAILKREPGAAEQVDNKGRNFLHVAVQNS  
DIESVLFLISVQANVNSRVQDSAKLSPLHLAVQAGSEIIVRNLLLAGAKVNELTKHRQTALHLAAQQDLSTICSVLIENG  
VDFAAVDENGNNALHLAVMQGRLNNVRALLTESNVDAEAYNLSQSPMHVLGQYGKENAAAIFELFLECMPEYPLDKPDNE  
GNTVLLLAYMKGANLNCRAIVRAGARLGVTNNQGINIFNYQVATKQLLFRLLDMLSKEPPWCDGSNCYECITKFGVTTRK  
HHCRHCGRLLCHKCSIKEIPIKFIDLNPVRVCDICFDVLTGGS

>XP\_002662342.2 alsin isoform X5 [Danio rerio]

MEKLSSGEGDSSGERGLLHTWKGYSYSTAPERVLLSRPVLQAALGARHGVLLVEGGQVYSFGELPWKQNQTSSAEPILE  
AVLSEQRVVFVAAGSAHSGVVTEDEGGVHMWGENVHGQCGLLGLSVIPNTPVGVLDSEATPPQTVKILEVACGDQHTLAL  
SAKHEVWAWGSGCQLGLNTSTFPVWKPQKVDHLSGRHVLQVACGSAHSVALVRCLPPPQEPRKPPQDKCGQCHQLLYTM  
T

DKEDHVIISDGHHCPLGVEMDSTEIKSAVEGSPDPGKPGKSSPTEPVPCMSTQISKSPTSSNISESTRPPESTLPFELQN  
QVPAYCQESIEAPVEDSAAHEAPAAAGEVCVEASENSIPEPDSRSGSKSPYPDEQAVKAYLKRLSDHALAEHTIKTSST  
IHSAQLSGDPANLFASEPLIPVAQSVTPMGSALNNLVVSCASAVGERVVSTYEALSLRKVIGYWVPGEGRERVEERLRLE  
ESMQGKKSSSLGDIREEEAELSRRLSLPGLLSQVSPRLLRRTSRPRMRAVPLASGGIPETDAHLPSLQTEVWSWGQGQDG  
QLGHGDLLPRLQPCVKSLNGKEVLKVAAGAHSLALTAQSQVFSWGCNTSGQLGHMESPTTFPQLTKLSDGIRVWDIGA  
GLQHTLLLADGDCIQPILYYSGQQVKEVPEPTEEEEQTAEYTQQPVLLPFCMNLGYVSSVYAGGRTCAALTDCNVMGFIA  
SLHELAAAERKYYCKLSNIKSLLLQPLLKLDLSSALGQSSAGLLQNLIGRMSRLSQLTGQNSASLTSFLQRSRDIRGLV  
ILED AHLFLDTYSEYSSAVGDLVMGGFQALVKPCHDVFGKGAEVVQRLSECSEGLTLADVLAHLFYLPKHLHEYGRLL  
LLKLATCYEVSSVDYQKLQDACSKFESMALHLKRRRKEAETLHFWSFPGKMTDSLKPSRRLICESSNKALTLQNAGR  
FSVNWFI LNDALVHAQFSTHHIFPLATLWVEPISEESTGVYGLKVTSPSESFALLASSPAEKAKWLR SINQAVEQALSG  
LGHDGIPPSTGMTQRADPPISRTASYTFYKDSRLKDAKYDGRWVSGKPHGRGVVKWPDGRMYTGTFKNGFEDGFGDYVVS

NKTLNSCDHYQGQWKDGKMHGFGTFRYASGEVYEGSFQDNMRHGHGMLRSGKLNSTSPSVFIGQWQYDKKSGYGVFDDI  
T  
RGEKYMGMWLDDQRQGNVVTQFGLYYEGAFSNNKMMGTGVLLSEDDTTFEGEFLEDWTLNGKGVLTMPNGDYIEGS  
FC  
GVWGTGLKMSGSYKPSLYDS DKEKGHALKLGRLAVHSEEKWKAVFLECWNRLGCDSPVQGQTTTAWDNIAIALTANLR  
Q  
QRDSPPELLSRSHHKTLESLECIPQHVGPVTLEVYHTIRRYLVKACDTPLHPLGRLVETLVSVYRMTYVGVGANRRLLPQA  
VNEITSYLSRIFQLVRFLPELPEEGSLADPPKEKVGTDADGKLLESPKPGCVVSSSALLLPVLLPRLYPPLFTLYALE  
KEKEDDVYWECEVLRLNKQPD LALLAFLGVQQKFWPVTVTIHGEKQQVLSSTKDACFASAVETLQQISTTFTPSDKLQVQI  
LTFEETQEVLALLKQDFLWSMDDLFPVFLFVVLRLRIRNLGSEVSLIEDLMDPCVQHGEHGIMFTTLKACYYQIQHEKV  
T

>XP\_005171962.1 rabankyrin-5 isoform X1 [Danio rerio]

MAEEEVQKLQKHLALLRQEYVKMQKL VETERRCVLAQAASVPGSSSQASDSFISRLLAIVSDLYQQEQYSDLKVKIGD  
QRLSAHKFVLAARSEIWSLANLASTSELDLSDAKPEVAMAMLRWTYTDDLELNGNDGFLIDLMKLANRFQLHLLRERCEK  
GVMSSVNVNRNCIRFYQTAEELDAATLMNYCGEIIASHWDDLKEDFSTMDAQLLYKMIKSKTEYPLHKAIVEREDVVFL  
YLIEMDAQLPGLNELDNNGDLALDLALS K KLESIAATLVNNKADVDMVDQSGWSLLHKAIRGDEFASFILIRHSAQVN  
AATVGAVETPLHLVCSFSPKKHSGEVMAGMARIAEALLKAGANPNMQNSKGRTPLHEAVVSGNEPVFNQLLQCKQLDLEL  
KDHEGSTALWLALQYITVASDPSVNPFEDEAPVVGTSFDENSFAARLIQRGSNPDAPDTNGNCLMQRAAVAGSEAAAIF  
LATHGAKVNHTNKWGETPLHTACRCGLAGLTVELLQQGANPNLQTDIALPGGVEKSQGVSSQQSPLHLAIVHNHPDVVSVI  
LEQKANALHATNNLQIIPDFSLKDSMDQTVLGLALWTGMHTIAAQLLGSGAAINDTMSDGQTLLHMAIKRQDSKSALFLL  
EHQADINVRTQEGQTALQLAISNQLPLVVD AICTRGADMSVVNEKGDPPLWLALENGLEDIASTLVRHGCDATCWSSGPG  
GCQQTLLHRAIDENNEVTACFLIRSGCDVNSSRRPGPNGEDEEARDGQCPLHLAASWGLEEVAQCLLEFGANVNAQDSE  
GRAPIHVAISNQSVIIQLLISHPEIRLNIRDRQGMTPFACAMTHKNNKAAEAILKREPGAAEQVDNKGRNFLHVAVQNS  
DIESVLFLISVQANVNSRVQDSAKLSPLHLAVQAGSEIIVRNLLLAGAKVNELTKHRQTALHLAAQQDLSTICSVLIENG  
VDFAAVDENGNNALHLAVMQGRLNNVRALLTESNVDAEAYNLRGQSPMHVLGQYGKENAAAFELFLECMPEYPLDKPD  
N  
EGNTVLLLAYMKGNANLCRAIVRAGARLGVTNNQGINIFNYQVATKQLLFRLLDMLSKEPPWCDGSNCYECITKFGVTTR  
KHHCRHCGRLLCHKCSIKEIPIIKFDLNKPVRC DICFDVLT LGGS

>XP\_005157097.1 zinc finger FYVE domain-containing protein 21 isoform X1 [Danio rerio]

MSAVPDGKKLVRSPGLRMVPENGAFNSPFTLDEPQWVPDKECPRCMQCDTKFDFITRKHHCRRCGRFCDKCCSQKVAL  
PRMCFVDPVRQCAECSLISQKEVEFYDKQLKVLTAGGTFFVKVGSSEKSETMVCRLSNHRYLFLDGNSHFEVELSRISS  
MQVLTEGSTPGEKDICSYTSLLDNQISEGGTLRASGMVLQYKPPGSLDLQQLNMDTADDKRIASAWLAAMHKA AKLLYES  
KDQ

>NP\_001153818.1 zinc finger FYVE domain-containing protein 21 [Danio rerio]  
MSAVPDGKKLVRSPSGLRMVPENGAFNSPFTLDEPQWVPDKECPRCMQCDTKFDFITRKHHCCRRCGRFCFDKCCSQKVAL  
PRMCFVDPVRQCAECSLISQKEVEFYDKQLKVLTAAGTFVVKVGSSEKSETMVCRLSNHRYLFLDGNSHFEVELSRISS  
MQVLTEGSTPGGGTLRASGMVLQYKPPGSLDLQQLNMDTADDKRIASAWLAAMHKAACKLLYESKDQ

>XP\_021336159.1 zinc finger FYVE domain-containing protein 21 isoform X2 [Danio rerio]  
MSAVPDGKKLVRSPSGLRMVPENGAFNSPFTLDEPQWVPDKECPRCMQCDTKFDFITRKHHCCRRCGRFCFDKCCSQKVAL  
PRMCFVDPVRQCAECSLISQKEVEFYDKQLKVLTAERRSSDRFGTNEG

>NP\_991308.1 WD repeat and FYVE domain-containing protein 2 [Danio rerio]  
MAAEIHPRPQTRKPVLLSKIEGFQDVVNTAVIIPKEDGVISVSQDRTIRVWLKRDSGQYWPSVYHTMPVACSCMSFNPET  
RRISVGLENGTVSEFVLSSEDYNQMTPARTYQAHQGGVTVVLFVLEMEWVLSTGQDKSFTWHCSESGQQLGTYRTTAWVSG  
LQFDVETRHAFFVGDHSGQVTILKLEQDNCSLVTTFKGHTGNVTALCWDVPVQRVLFSGSSDHSIIMWDIGGRKGTAIELQG  
HNDKVQGLCYAPHTRQLISCGSDGGIVIWNMDVTRQETPEWLSDSCQKCEQPFFWNFKQMWDSSKIGLRQHHCRCGQA  
VCGKCSSKRSTIPLMGFEFEVRVCDSDCHDLITDEERAPTATFHDSKHSIVHMQYEPTRGWLLTSGTDKVIKLWDMTPVVS

>XP\_009295365.1 FYVE and coiled-coil domain-containing protein 1-like isoform X1 [Danio rerio]  
MATGAAVGDSQIQRIIRDLRDAVSELTKEYKESGEPITDDSSNLHKFSYKLEYLLQFDQKEKTTFLGSRKDYWDYFSDCL  
AKIKGANDGIRFVKISSELKTSLGKGRAFIRYSLVHQRLADTLQQCLMNSRVTSWYNPRSPFLKPHLSVDIISYLYELN  
DVQFDVASRGHDLDAEWPTFARRTLGMTSSPSHLWKAPSRSSSINSLASTYSQQHHEFPGPSDFGPGLSDMSMQNSSIL  
NDTSMASIDELRLELDQSELKQRELIDRIQQLGDEGSELRGVVVELQRQLDVSLAAQGNHQELQRNLEVLIIESEHALSRE  
VEVLRDRETRREVSHKDLQDMLAAERKNEELMTRLDGVLDEKGQRAASDFNSAQKIHLLNELKEAEKKRMDALAECEE  
KRRHAEHLAEVVKVDEALKEAEVKMAAWMEKGEQLQTRAVEQRNFMEKLQALAVREKETSNLQRQLRDLQNSLENM  
EK  
QANVEKKRMQDDKEELEMKMNGLEGLLQSLRTQLKVKESDLLSSTKR VHFLERESEKLRSENQKLEYELNSTKKEAKKI  
DEYKDSCAKLIEQNTKLLQTVNKNEESKKELLENKSSLESEL AGLRASEKQLRAQIDDAKVTVDEREQRLREENRNLDES  
LQKANMQLEESESSIRQKEQENKDLMEVQVTLKSALAAMQKEIRDINNQIGELEKNLGVARCNEANLNAQLKDKATQLED  
REKLCEELQGRVEELESQRDLVEKTKAERAFVKQTEMIQSLEAQRNLA EKTQLEKSTCQAKETKEMALKLTLLLEDQLG  
LSAKEVSKLQEEVVNLRAKLHSAVEEKDKTQAKLEVTEASCAELRILTEHLKKQAEQNR LHVSELLQSSEHVDKLTSQL  
NQETSAHEKT TAALASAKEDLVALKAQNERMVLENAETRESLHRVNT EMAELGMTICKLTAEREEARERWAAEAVRIQEL  
QQHGVKETERLNASLVALHQENSSLQEELQQTDKLSETMLELKQLLDKTEGERDAAREEITAVKFQMSTESMSLKHQMK  
LQEEIDGLKDQLDTERKKKSELEAKLSELEGANVEYSRLIEEKDSHITYCETLLRESESETQQLQERASRSKEALS DVEK  
EREELKQKLDQVLMETQNQHLRMSAELEDLGQTKVNLEERLIELIRDKDALWQKSDALEFEQKLRAEEQWWLVDKEATHC  
LGCQGQFTWWLRRHHCRLCGRIFCYCSNNYVMTKNSKKERCCRECYTQHGA VVERFTKAELNSSSDNQPSNTAAQLPPP  
PYIPTPRVTVDTPGERADDGAFDIITDEEVNQIYDSDSRTTNGSHEEEGGQTGDNSVSSDVTSEEQEDMISVQDAEITLL  
KSGELSASVPLDIDEIPHFGDGSRELFVKSSCYSTIPITVGDRGPIISWVFSSEPKSISFTVVYRETLDTPVEQAKVLIP

LTRCN SHKETIQGQLKVRNAGVYTLIFDNSFSRFLSKKVNYHLTIEKPVYIDGSDFP

>XP\_021332794.1 FERM, RhoGEF and pleckstrin domain-containing protein 2 isoform X5 [Danio rerio]

MGEIEGSYRSLQTPAGSRLGGQHNTGISTLEPGQSLSSAMGAGGKGHNKGLQIRVQGLDEAQEFYELESKADGQLLLSDV  
FRRINLIESDYFGLEFQNLQMNWVWLDPSKLIVKQVRRPMNTLFRLSVKFFPPDPGQLQEEFTRYLFSLQIKRDLLDGRL  
SCTENTAALLASHLVQSEIGDYDDLADREFLKMNKLLPCQEHVQEKIMELHRRHTGQTPAESDFQVLEIARKLEMFGVRF  
HPAADREGTKINLAVAHMGLQVFQGHKINTFNWSKIRKLSFKRKRFLIKLHPEVHGPHQDTLEFLMGSRDQCKIFWKNC  
VEHHSFFRLLDQPQPKSKAIFFSRGSSFRYSGRTQKQLVEYVRDSGLRRTPYQRRNSKIRMSTRSLASDVPKQNLSFNDS  
LRTHIPPSSITASFQSLHAPSVMRAETPNQLLHLHQTQHQPLRAPSPMKQDPIKTNSQSTYAFPDSIAIDSPQLSPFND  
KGPLCLSPSFQMSTLSLPGQAPSPLQSPILNEVG TARLDEDEEGRRKRYPTDKAYFIAKEILT TERTYLKDLEVITVWFR  
SAVIKENAMPEGLMTLLFSNIDPIYEFHRGFLKEIDQRLALWEGRSNAHVKG DYQRIGDVMLRNMCSLKEFTGYLQKHDE  
VLTELEKATKR VKKLETVYKEFELQKVCYLPLNTFLLKPIQRLMHYKLILERLCKHYSPQHRDYDDCKEALKEVAEIATQ  
LQSSLIRLENFQKLTTELQRDLIGIENLTAPGREFIREGCLYKLTKKGLQQRMFLLFSDMLLYTSKGV TATNQFKVHGQLP  
LHGMILIVLDAPVEESENENWSVPHCF TIYSAQRTIVVAASSKVEMNKWIEDLNMAIEMSKKCKEQKSDVLLDPSLCDRSNR  
SSDEVSLQESEDDMNSSRCSLDKQSHHRANTTMHVCWHRNTSVSMSDHSLAVEYSVLQPCLQSFLAICSVRARDQTPS  
HMCAGTATRTCLSVTICA

>XP\_021332793.1 FERM, RhoGEF and pleckstrin domain-containing protein 2 isoform X4 [Danio rerio]

MGEIEGSYRSLQTPAGSRLGGQHNTGISTLEPGQSLSSAMGAGGKGHNKGLQIRVQGLDEAQEFYELESKADGQLLLSDV  
FRRINLIESDYFGLEFQNLQMNWVWLDPSKLIVKQVRRPMNTLFRLSVKFFPPDPGQLQEEFTRYLFSLQIKRDLLDGRL  
SCTENTAALLASHLVQSEIGDYDDLADREFLKMNKLLPCQEHVQEKIMELHRRHTGQTPAESDFQVLEIARKLEMFGVRF  
HPAADREGTKINLAVAHMGLQVFQGHKINTFNWSKIRKLSFKRKRFLIKLHPEVHGPHQDTLEFLMGSRDQCKIFWKNC  
VEHHSFFRLLDQPQPKSKAIFFSRGSSFRYSGRTQKQLVEYVRDSGLRRTPYQRRNSKIRMSTRSLASDVPKQNLSFNDS  
LRTHIPPSSITASFQSLHAPSVMRAETPNQLLHLHQTQHQPLRAPSPMKQDPIKTNSQSTYAFPDSIAIDSPQLSPFND  
KGPLCLSPSFQMSTLSLPGQAPSPLQSPILNERYPTDKAYFIAKEILT TERTYLKDLEVITVWFRSAVIKENAMPEGLMT  
LLFSNIDPIYEFHRGFLKEIDQRLALWEGRSNAHVKG DYQRIGDVMLRNMCSLKEFTGYLQKHDEV LTELEKATKR VKKL  
ETVYKEFELQKVCYLPLNTFLLKPIQRLMHYKLILERLCKHYSPQHRDYDDCKEALKEVAEIATQLQSSLIRLENFQKLT  
ELQRDLIGIENLTAPGREFIREGCLYKLTKKGLQQRMFLLFSDMLLYTSKGV TATNQFKVHGQLPLHGMILIVLDAPVEE  
SENENWSVPHCF TIYSAQRTIVVAASSKVEMNKWIEDLNMAIEMSKKCKEQKSDVLLDPSLCDRSNRSSDEVSLQESEDDM  
NSSRCSLDKQSHHRANTTMHVCWHRNTSVSMSDHSLAVENQLSGYLLRKFKNSNGWQKLWVVF T NFCLFFYKTHQDDFP  
L

ASLPLLGYTVSTPGESDSIHKEYVFKLQFKSHVYFFRAESEYTFERWMEVIKSAASATGRMSLLVPKGPAEVNVGN

>XP\_009300696.1 FERM, RhoGEF and pleckstrin domain-containing protein 2 isoform X1 [Danio rerio]

MGEIEGSYRSLQTPAGSRLGGQHNTGISTLEPGQSLSSAMGAGGKGHNKGLQIRVQGLDEAQEFYELESKADGQLLLSDV  
FRRINLIESDYFGLEFQNLQMNWVWLDPSKLIVKQVRRPMNTLFRLSVKFFPPDPGQLQEEFTRYLFSLQIKRDLLDGRL



SCTENTAALLASHLVQSEIGDYDDLADREFLKMNKLLPCQEHVQEKIMELHRRHTGQTPAESDFQVLEIARKLEMFGVRF  
HPAADREGTKINLAVAHMGLQVFQGHKTINTFNWSKIRKLSFKRKRFILKLHPEVHGPHQDTLEFLMGSRDQCKIFWKNC  
VEHHSFFRLLDQPQPKSKAIFFSRGSSFRYSGRTQKQLVEYVRDSGLRRTPYQRRNSKIRMSTRSLASDVPKQNLSFNDS  
LRTHIPPSSITASFQSLHAPSVMRAETPNQLLHLHQTHQPLRAPSPMKQDPIKTNSQSTYAFPDSIAIDSPQLSPFND  
KGPLCLSPSFQMSTLSLPGQAPSPLQSPILNEVG TARLDEDEEGRRKRYPTDKAYFIAKEILT TERTYLKDLEVITVWFR  
SAVIKENAMPEGLMTLLFSNIDPIYEFHRGFLKEIDQRLALWEGRSNAHVKG DYQ RIGDVMLRNMCSLKEFTGYLQKHDE  
VLTELEKATKR VKKLET VYKEFELQKVCYLPLNTFLLKPIQRLMHYKLILERLCKHYSPQHRDYDDCKEALKEVAEIATQ  
LQSSLIRLENFQKLTELQRDLIGIENLTAPGREFIREGCLYKLTKKGLQQRMFFLFSDMLLYTSKGV TATNQFKVHGQLP  
LHGMILIVLDAPVEESENEWSVPHCF TIYSAQRTIVVAASSKVEMNKWIEDLNMAIEMSKKCQEKSDVLLDPSLCDRSNR  
SSDEVSLQESEDDMNSSRCSL DKQSHHRANTTMHVCWHRNTSVSMSDHS LAVENQLSGYLLRKFKNSNGWQKLWVVFT  
N

FCLFFYKTHQDDFPLASLPLLGYTVSTPGESDSIHKEYVFKLQFKSHVYFFRAESEYTFERWMEVIKSAASATGRMSLLV  
PKGPAEVNVGN

>XP\_001344703.1 zinc finger FYVE domain-containing protein 1 [Danio rerio]

MSGQGSSAEKGLNGVLVCQESYACGGTDEAAFECDCEGSLQCIRCELELHRQDRMRNHDRIAPGHVPYCDSCKG DGGV  
PNGGRLRAVVRCQGCKINLCLDCQKRTHSGVSKRKHPLTAYPPPSKPPENNCSTGDEQLDELKAKLEK VTSFLLVDENED  
MQVKNEEDFVRKLGC RPEELLKVVSIFGNTGEGKSHTLNHTFFLGREVFKTSPTQESCTVGVWAAMDPVHKVVVVDTEGL  
LGAGTNQGGQRT RLLKVLAVSDLVIYRTHADRLHDDLKFGLGDASDAYLKHFTKELKATTARCGLDVPLSTLGP AVIIFH  
ETVHTKLLGSDKPSESAERLLQERFRKLGLFPEAFSSIQYRGTRTHNPPTDFSGLLRSVEQQLDNNSTRSPRSAGVIHKA  
LQALSECFSGEIPDEHLASNSFFPDEYFTCSSICLSCGSGCKNSMNLREGVVHEAKHRCRYSAHYDNRIYTCKACYESG  
KEVIVVPKTTASSDSPWFGLAIYAWSGYVIECPNCSVIYRSRQYWYGNQDPVDTVVRTEIQHVWPGSDKFLKDNNNAAQR  
LLDGVNFMAQSVSELSVKPAKAVTAWLTDQIAPAYWKPNLILRCYKCGAGFEDNDTKHHCRACGEGFC DGCSSKTRPVP  
ERGWGLAPVRVCDACFQNRGIPEELDDAALEEEEGGTLIARKVGEAVQNTLGAVVTAIDIPLGLVKDAARPAYWVPDQDI  
RCCNQCQREFNARLSIHHCRACGQGVCNDCSPDRRAVPSRGWDHPVRVCTTCNQKSGEL

>XP\_021333893.1 myotubularin-related protein 3 isoform X1 [Danio rerio]

MEEEGQQSLECIQANQIFPRKPPVLEEDLQVPFPELHGEFTEYVGRAEDAVIAMSSYRLHIKFKESVNNCSCEVSVPL  
QLIECVECRDMFQLHITCKDKIVRCQFSTFEQCQEWLKR LTA AVRPPSRIEELFSFAFHAWCVDLYTGEKEQHGDLCRP  
GDHVMSRFHNEVERMGFDTQNAWRVSEINNKYKLCSSYPQLLLVPAWITDKELENVAAFRSWKRIPAVVYRHQSTGAVIA  
RCGQPEVSWWGWRNADDEHLVQSIARACAVDSSSCKGVSNGSLSREYTN GADLSDVDFESSMTNSSEVETLAIQPRKLLI  
LDARSYAAAVANRAKGGGCECPEYYPNCEVVFMMGMA NIHSIRKSFSQSLRFLCTQMPDPANWLSALESTKWLQHL SLLKKA  
SLLVSNAVDRDHRPVLVHCSDGWDRTPQIVALAKLLLD PYYRTIEGFQVLVETEWLDFGHKFADRCGHGENAEDLNERCP  
VFLQWLDCVHQLQRQFPCSF EFNEAFLVKLVQHTYSCLFGTFLCNSGKEREDRRIQERTCSVWSLLRAANRSFGNMLYSS  
HSETVLHPVCHVRNLMLWTAVYLPSSSPTTPSDDSCAPYPAPGANPEDQPLGRRPKTRSF DNLP SACEVGNPLTSNRRSS

DPSLNEKWQDHRRSLELNIGAGTDGAASPEPDERVNGQTMVGIMGTFSNGGTENGEGLKDVRLPMIDGVDEAELTVGVAV  
GQMENILQEATKDESAPDTRSVAKPNETSAVNGKTDDIAQEGRTEDDLESKSLEDGNVNGHCSEDGNSEASSALSQDTSE  
SQDSEEIEKCTTQEDDSSCNPTILTPNGLRTLNGHGVESIEQAEKRLSLLESSTETLTEDLGVRPESLGPLSIPPLK  
ALAESSCLKQGLRTAARTLNNTPKRASLSAFPASTDLLHPMCNGDSPDPEPSTPRTNGERATLSRQVSLASCGSLTLHA  
RGTCSHHRCLEHLGFLGRPSFSPPEPPSSSSSRSHLDDDGLTLHTDAIQRLRQIEAGHQLEVEALKRQVQELWSRLESHQA  
AGMLRLNGDIGDEVTSITDSDFNLEPNCLSRCSTELFSEASWEQVDKQDTEVTRWYPDHLAAQCYGCERGFWLATRKHHC  
RGKERMEEVWNCGNVFCGSCCDQKIPVPSQQLFEPSPVCRSCFSNLQPPAPPLDLELDKPITASSN

>XP\_021332792.1 FERM, RhoGEF and pleckstrin domain-containing protein 2 isoform X3 [Danio rerio]

MGEIEGSYRSLQTPAGSRLGGQHNTGISTLEPGQSLSSAMGAGGKGHNKGLQIRVQGLDEAQEFYELESKADGQLLLSDV  
FRRINLIESDYFGLEFQNLQMNWVWLDPSKLIVKQVRRPMNTLFRLSVKFFPPDPGQLQEEFTRYLFSLQIKRDLLDGRL  
SCTENTAALLASHLVQSEIGDYDDLADREFLKMNKLLPCQEHVQEKIMELHRRHTGQTPAESDFQVLEIARKLEMFGVRF  
HPAADREGTKINLAVAHMGLQVFQGHKTINTFNWSKIRKLSFKRKRFLIKLHPEVHGPHQDTLEFLMGSRDQCKIFWKNC  
VEHHSFFRLLDQPQPKSKAIFFSRGSSFRYSGRTQKQLVEYVRDSGLRRTPYQRRNSKIRMSTRSLASDVPKQNLSEFND  
LRTHIPPSSITASFQSLHAPSVMRAETPNQLLHLHQTQHQLPLRAPSPMKQDPIKTNSQSTYAFPDSIAIDSPQLSPFND  
KGPLCLSPSFQMSLTLSPGQAPSPLQSPILNEVGTAARLDEDEEGRRKRYPTDKAYFIAKEILTERTYLKDLEVITVWFR  
SAVIKENAMPEGLMTLLFSNIDPIYEFHRGFLKEIDQRLALWEGRSNAHVKGDYQRIGDVMLRNMCSLKEFTGYLQKHDE  
VLTELEKATKR VKKLETVYKEFELQKVCYLPNTFLLKPIQRLMHYKLILERLCKHYSPQHRDYDDCKEALKEVAEIAATQ  
LQSSLIRLENFQKLTELQRDLIGIENLTAPGREFIREGCLYKLTKKGLQQRMFFLFSDMLLYTSKGVATATNQFKVHGQLP  
LHGMLIVLDAPVEESENEWSVPHCFITISAQRTIVVAASSKVEMNKWIEDLNMAIEMSKKCQEKSDVLLDPSLCDRSNI  
FSSPAVSPELPPRYLLGQGQRPNTITHVCWYRNQNLSDYLRLMNQNLQSGYLLRKFKNSNGWQKLWVFTNFCLFFYKT  
HQDDFPLASLPLLGYTVSTPGESDSIHKEYVFKLQFKSHVYFFRAESEYTFERWMEVIKSAASATGRMSLLVPKGPAEVN  
VGN

>XP\_009302003.1 myotubularin-related protein 3 isoform X2 [Danio rerio]

MEEEGQQSLECIQANQIFPRKPPVLEEEDLQVPFPELHGEFTEYVGRAEDAVIAMSSYRLHIKFESVNVNPLQLIECVE  
CRDMFQLHITCKDCKIVRCQFSTFEQCQEWLKRLTA AVRPPSRIEELFSFAFWCVDLYTGEKEQHGDLCRPGDHVMSR  
FHNEVERMGFDTQNAWRVSEINNKYKLCSSYPQLLLVPAWITDKELNVAAFRSWKRIPAVVYRHQSTGAVIARCGQPEV  
SWWGWRNADDEHLVQSIARACAVDSSSCKGVSNGLSREYTNAGADLSDVDFESSMTNSSEVETLAIQPRKLLILDARSYA  
AAVANRAKGGGCECEPEYYPNCEVVFMGMANIHSIRKSFQSLRFLCTQMPDPANWLSALESTKWQLHL SLLLKASLLVSNA  
VDRDHRPVLVHCSDGWDRTQPIVALAKLLLDPYRTIEGFQVLVETEWLDFGHKFADRCGHGENAEDLNERCPVFLQWLD  
CVHQLQRQFPCSFENEAFVLVQHTYSCLFGTFLCNSGKEREDRRIQERTCSVWSSLRAANRSFGNMLYSSHSETVLH  
PVCHVRNLMLWTA VYLPSSSPTTPSDDSCAPYPAPGANPEDQPLGRRPKTRSFNLP SACEVGNPLTSNRRSSDPSLNEK  
WQDHRRSLELNIGAGTDGAASPEPDERVNGQTMVGIMGTFSNGGTENGEGLKDVRLPMIDGVDEAELTVGVAVGQMENIL  
QEATKDESAPDTRSVAKPNETSAVNGKTDDIAQEGRTEDDLESKSLEDGNVNGHCSEDGNSEASSALSQDTSESQDSEEI

EKCTTQEDDSSCNPTILTPNGLRTLNGHGVESIEQAEKRLSLLESSTETLTEDLGVRPESLGPLSIPPPLKALAESSC  
 LKQGLRTAARTLNNTPKRASLSAFPASTDLLHPMCNGDSPDEPSTPRTNGERATLSRQVSLASCGSLTLHARGTCSHH  
 RCLHLGFLGRPSFSPPEPPSSSSSRSHLDDDGLTLHTDAIQQLRQIEAGHQLEVEALKRQVQELWSRLESHQAAGMLRLN  
 GDIGDEVTSITDSDFNLEPNCLSRCSTELFSEASWEQVDKQDTEVTRWYPDHLAAQCYGCERGFWLATRKHHCRCRKERME  
 EVWNCGNVFCGSCCDQKIPVPSQQLFEPSRVCRSCFSNLQPPAPPLDLELDKPITASSN  
 >XP\_017211771.1 WD repeat and FYVE domain-containing protein 3 isoform X6 [Danio rerio]  
 MLAEHRENSRAGFGLKKPLKMNVMVKRIMGRPRQEECSPQDNALGLMHLRRLFSELCHPPRHMTQKEQEELLYMMLPVFN  
 R  
 VFGNAPPSTMNEKFSDDLQFTTQVSRLMVTEIRRRASNKSTEAASRAIVQFLEVNQSEETSRGWMLLTINLLASSGQKT  
 VDCMTTMSVPSTLVKCLYLFFDLPHMPEVPAATQTELPLADRRALLQKVVFVQILVKLCSFVSPAEEAQAQDDLQLLFSAI  
 TSWCPPHNLPWRKSAGEVLTISRHGLSVNVVKYIHEKECLSTCIQNMQQSDDLSPLEIVEMFAGLSCFLKDSSDVSQTL  
 LDDFRMCQGYTFLIDLMIRLEQAKEDESKDALKDLVNLVTALTTYGVSELKPAGLTGAPFLLPGFVVPQPSGKGHTVRN  
 IQAFSVLQNAFLKAKSGRLARMILEAIANIYAADYANYFILEAQHTLSQFAERVTKLPEVQSKYFELLEFFVVFGLNYVPC  
 KELFSVSVLLKSSTSYGCSITATRTLLKLGRHHPVFSDFREVGLLEVLVNLHLYAALLKDPTQTHSDQGDSKNNVAEE  
 QKQLAWLVMETLTVLLQGSNTNAGLFREFGGARCVDHIVKYRQCREHALMIIQQLVLSPSGDDDMGTLLGLMHSAPTAEL  
 QLKTDILRALLAVLRESHRTRTVFRKVGGFVYVTSLLAMERSLCSPPVIGWEKVNQNKVFELLHTIFCTLTAAAMYEP  
 NSHFFRTEIQYEKLADAVRLLGCFSDAKKVGPAATVFPNAQPFQRLLEDEIIPAENVCPTLKHCSKLFYMYKMATDSFD  
 RHGYSSSSNSASGKALTDLKLHLGNSSQHSSDPVVIHPGAVLAMLDLLPSVSSDTQPEHALDLQLAVANILQLLVHSERN  
 QQILCEAGLHSRLLQRCSCALGDEDHPLHPLQRMFERLASQALEPMVLREFRLGNPLNCGAWDKKLLKQYRVHKPSSL  
 SYEAEMRNSMTLSMEGFGPDSVFTINEDNSQYRISRSLVRS AEGSTVPLTRVKCLVSMTPHDIRLHGSSVTPAFVELDT  
 SLEGFGCLFLPSLAPHNAPSSNANTSGVSDGAVVSGMGNGERFFPPPSGLSYSTWFCVERFSTPPQSHPVRLTIVRRAT  
 SSEQHYVCLAIVLSAKDRSLIVSTKEELLQSYVDDFSEESSFYEILPCCARFRCADLITEGQWHHLLLVMSKGMLKNSMA  
 TLVIDGQMVSTVKLHYVHNSPGGSASANPPVVSTVYSYIGTPPAQRQLSTLVWRLGPTHFLEEVLPAASVAAIYELGPNY  
 VGSFQAVYLPCKDSKTEAVPPCPVGLVPEEKVSFSLFAHSVSALTVAKIRKVYNKLD SKAIAKQLGVSSHESATPVKL VH  
 NAVGHLNGSARTVGA AVIGYLG VRA FVT KPVATNLQYIGGAAAILGLVAMASDVEGLYAAVKALVCVVKSNPLASKEMER  
 IKGYQLLAMLLKKKRPLLNSHILHLTFSLVGTVDSGHETSII PNSTAFQDLLCDFEVWLHAPYELHLSLFEHFIELLTES  
 SEAAKNAKLLREFQLIPKLLLTLRDQSLSQPTITAIGNVLSLLLQGFNPNTYDLLRFGQFISSTLPTFAVCEK FVIMENTN  
 EEKIDRGADEEFGGLSSNLILLNRLLDILLKQLFSCKEKGTVNAQACEELVRTLGFDWLLMFMEEHHSSTVTAALLI  
 LVVLLSNQSILSRFKEGLSGGGWLDHTDSVLTNKIGTVLGFNVGRSAGGRSTLREINRDACHFPGFPVLQTLLPKHTNVP  
 EIYFMLMALFFQQPITELPESLQVHFDLDSIWTFIFGVPASSATVVGSLHNMCTETAFLLLAMLRSMNLNPWQSEEEGSW  
 LREYPITLMQFFRYLYHNIPDLAPMWHSPDFLCTLAATVFPFNIRPYSEMVSDDLDEASSPTEEFKAFVTDGTGMNRSQSE  
 YCNVGNKTYLTNHPAKKYVFD FMRLIMDNLCMTPASKQTPIIDLLEASPERSTRTQQKEFQSYILDSVMEQLLAADV L  
 MGEEASLPITTGGSYQVLVNNVFYFTQRVVDKLWQGMFNKESKL VVD FIVQLITQSKRRSQGLSLDSVYHCLNRTILYQL

SRPHKTVPPQQVTLLDSLRLVTVNRNLVLGPGNHDQEFVACLAHCLINLHTGSSVEGFGLEAEARMTTWHVAVPSENE SDS  
VQSQDVSEGRQLLLKAVNRVWTELMHRSKRQMLEDFKVSPLVNDRGHVDIGTARPALEPAKSWQNHLVHEKKCISRGE  
TVAPANQSKLSRVSSGFGLSKLTGSRRSKKESGMNKNLSAQETFQWMFTHIAVVRDLVAMQYKEHQERQQNALKYVMD  
E  
WAGIEYELLRERGLWGPPIGSHLDKFQLDMTEGPCRMRRKKMVRNDMFYIHYPYVPDPEPNASTQKPARYRRAISYDSKEY  
YMRLLSGNPGMYQHSIEQNTEGETTQQEPEHGEDIARVKGLVKAPLKRSRSTADGADEESQDQLQELLES GAMDEEQKT  
DNTTLLRLLEEGERKIQHMYRCARVQGLDTSEGLLLFGKEHFYVIDGFTMTVTREIRDIETLPPNMHEPIIPRGARQSKSQ  
LKRTCSIFAYEDIREVHKRRYLLQPMMAAEVFSGDGRNYLLAFQKGVNRNKVYQRFLAVVPSLADSSSVSGQRPNTSVEQG  
SGLLSTLVGEKSVTQRWERGEISNFQYLMHLNLTLAGRSYNDLMQYPVFPWILADFDSEELDLNNPKTFRNLSKPMGAQTD  
DRLIQYKKRFKDWEDPNGETPAYHYGTHYSSAMIVASYLVRMEPFTQIFLRLQGGHFDLADRMFHSVREAWLSASKHNMA  
DVKELIPEFFYLPEFLLNSNNFDLGSKQNGTKLGDVILPPWAKGDPREFIRVHREALECDYVSAHLHEWIDLIFGYKQQG  
PPAVEAVNVFHHLFYEGQVDIYNINDPLKETATIGFINNFGQIPKQLFKKPHPPKRVRSSKNGEAPGGPVTLNSTLDKIF  
FHHLDNLRPSLTPVKELKEPVGQIVCTDKGILAVEQNKVLVPPAWNKTFAWGYADLSCRLSNYESDKAVVVYECLSEWGQ  
ILCAICPNPKLVITGGFSTAICVWETGSSKEKAKSLTLKQALLGHTDAVTCLTASSAYHIVVSGSRDRTCHWDLNKL SF  
VTQLRGHRAPVSALCINELTGDIVSCAGTYIHVWSINGSPVASANTFTGRSQQLCCCVSEMNEWDTQNVIVTGHSDGVV  
RFWRIEFLQVPETPAPEPIEPPDVPDCCGEIEGRDAPDEDSSESEGEAEASLSQEPKPRSSNSQPSSAVHRPKPRTGASWS  
VDSSSDSRRWSDTLSIDEKEGFVFNYSSEGQVRPGVPVQPHSQPSGSHGPVPQPLQPSTMEARSYNKLKPGYRWERQ  
LVFRSKLTMHTAFDRKDNAHPAEITALAISKDH SKILVGDGRGRVFSWSVSDQPGRSTADHWVKDEQVSDSCSGCTVRFSL  
TERRHHCRCNGQVFCQKCSRQFQSEIKRLKISSPVRVCQNCYYNLQHRSSEENPRN  
>XP\_017211770.1 WD repeat and FYVE domain-containing protein 3 isoform X5 [Danio rerio]  
MLAEHRENSRAGFGLKKPLKMNVMKRIMGRPRQEECSPQDNALGLMHLRRLFSELCHPPRHMTQKEQEEKLYMMLPVFN  
R  
VFGNAPPSTMNEKFSDLLQFTTQVSRLMVTEIRRRASNKSTEAASRAIVQFLEVNQSEETSRGWMLLTINLLASSGQKT  
VDCMTTMSVPSTLVKCLYLFFDLPHMPEVPAATQTELPLADRRALLQKV FVQILVKLCSFVSPAEE LAQKDDLQLLFS AI  
TSWCPPHNLPWRKSAGEVLTITSRHGLSVNVVKYIHEKECLSTCIQNMQQSDDLSPLEIVEMFAGLSCFLKDSSDVSQTL  
LDDFRMCQGYTFLIDLMIRLEQAKEDESKDALKDLVNLVTALTTYGVSELKPAGLT TGAPFLLPGFVVPQPSGKGHTVRN  
IQAFSVLQNAFLKAKSGRLARMILEAIANIYAADYANYFILEAQHTLSQFAERVTKLPEVQSKYFELLE FVVFGLNYVPC  
KELFSVSVLLKSSTSYGCSITATRTLLKLGRHHPVFSDFREVGLLEVLVNL LHKYAALLKDPTQTHSDQGDSKNNVAEE  
QKQLAWLVMETLTVLLQGSNTNAGLFREFGGARCVHNIVKYRQCREHALMIIQQLVLSPSGDDDMGTLLGLMHSAPTAE L  
QLKTDILRALLAVLRESHRTRTVFRKVGGFVYVTSLLAMERSLCSPPVIGWEKVNQNKVFELLHTIFCTLTAA MRYEPA  
NSHFFRTEIQYEKLADAVRLLGCFSDAKKVG PATVFPSNAQPFQRLLEDEIIPAENVCP TLKHCSKLFYMYKMATDSFD  
SRHGYSSSSNSASGKALTDLKLHLGNSSQHSSDPVVIHPGAVLAMLDLLPSVSSDTQPEHALDLQLAVANILQLLVH SER  
NQQILCEAGLHSRLLQRCSCALGDEDHPLHPPLQRMFERLASQALEPMVLREFLRLGNPLNCGAWDKKLLKQYRVHKPSS

LSYEAEMRNSMTLSMEGFGPDSVFTINEDNSQYRISRSLVRS AEGSTVPLTRVKCLVSM TTPHDIRLHGSSVTPAFVELD  
 TSLEGFGCLFLPSLAPHNAPSSNANTSGVSDGAVVSGMGNGERFFPPPSGLSYSTWFCVERFSTPPQSHPVRLLTVVRRA  
 TSSEQHYVCLAIVLSAKDRSLIVSTKEELLQSYVDDFSEESSFY EILPCCARFRCADLITEGQWHHLLLVM SKGMLKNSM  
 ATLYIDGQMVSTVKLHYVHNSPGGSASANPPVVSTVYSYIGTPPAQRQLSTLVWRLGP THFLEEVLPAASVAAIYELGPN  
 YVGSFQAVYLPCKDSKTEAVPPCPVGLVPEEKVSFSLFAHSVSALTVA KIRKVYNKLDSKAIKQLGVSSHESATPVKLV  
 HNAVGHNLNGSARTVGAAVIGYLGVR AFVTKPVATNLQYIGGAAAILGLVAMASDVEGLYAAVKALVCVVKSNPLASKEM  
 E  
 RIKGYQLLAMLLKKKRPLLNSHILHLTFSLVGTVDSGHETSII PNSTAFQDLLCDFEVWLHAPYELHLSLFEHFIELLTE  
 SSEAAKNAKLLREFQLIPKLLLTLRDQSLSQPTITAIGNVLSLLLQGF PNTYDLLRFGQFISSTLPTFAVCEKFVIMENT  
 NEEKIDRGADDEEFGLLSSNLILLRNRLLDILLKQLFSCKEKGTVNAQACEELVRTLGFDWLLMFMEEHHSSTVTAALL  
 ILVLLSNQSI LSRFKEGLSGGGWLDHTDSVL TNKIGTVLG FNVGRSAGGRSTLREINRDACHFPGFPVLQTLLPKHTNV  
 PEIYFMLMALFFQQPITELPESLQVHFDLDSIWTFIFGVPASSATVVGSLHNMCTETAFLLLAMLRSMLNLPWQSEEEGS  
 WLREYPITLMQFFRYLYHNIPDLAPMWHSPDFLCTLAATVFPFNIRPYSEMVS DLDDEASSPTEEFKAFVTD TGMRNSQS  
 EYCNVGNKTYLTNHPAKKYVFDFMRL LMDNLCMTPASKQTPIIDL LLEASPERSTRTQQKEFQSYILDSVMEQLLAADV  
 LMGEEASLPITTGGSYQVLVNNVFYFTQRVVDKLWQGMFNKESKL VVDFIVQLITQSKRRSQGLSLDSVYHCLNRTILYQ  
 LSRPHKTVPPQQVTLLDSLRLVLT VNRLVLGPGNHDQEFVACLAHCLINLHTGSSVEGFGLAEARM TTTWHVAVPSENE SD  
 SVQSQDVSEGRQLLLKAVNRVWTELMH SKRQMLEDIFKVSLPVNDRGHVDIGTARPALEEPAAKSWQNH LVHEKKCISRG  
 ETVAPANQSKLSRVSSGFGLSKLTGSRRSKKESGMNKNLSAQET FQWMFTHIAVVRDLVAMQYKEHQERQQNALKYVM  
 D  
 EWAGIEYELLRERGLWGPPIGSHLDKFQLDMTEGPCRM RKKMVRNDMFYIHYPYVPDPEPNASTQKPARYRRAISYDSKE  
 YYMRLLSGNPGMYQHSIEQNTEGETTQQEPEHGEDIARVKGLVKAPLKRSRSTADGADEESQDQLQELLES GAMDEEQK  
 TDNTTLLRLLEEGEKIQHMYRCARVQGLDTSEGLLLFGKEHFYVIDGFTMTVTREIRD IETLPPNMHEPIIPRGARQSKS  
 QLKRTCSIFAYEDIREVHKRRYLLQPMAAEVFSGDGRNYLLAFQKGVRNKVYQRFLAVVPSLADSS ESVSGQRPNTSVEQ  
 GSGLLSTLVGEKSVTQRWERGEISNFQYLMHLN TLAGRSYNDLMQYPVFPWILADFDSEELDLNNPKTFRNL SKPMGAQT  
 DDRLIQYKKRFDKDWEDPNGETPAYHYGTHYSSAMIVASYLVRMEPFTQIFLRLQGGHFDLADRMFHSVREAWLSASKHNM  
 ADVKELIPEFFYLPEFLLNSNNFDLGSKQNGTKLGDVILPPWAKGDPREFIRVHREALECDYVSAHLHEWIDLIFGYKQQ  
 GPPAVEAVNVFHHLFYEGQVDIYNINDPLKETATIGFINNF GQIPKQLFKKPHPPKRVRSKSNGEAPGGPVTLNSTLDKI  
 FFHHLDNLRPSLTPVKELKEPVGQIVCTDKGILAVEQN KVLVPPAWNKTFAWGYADLSCRLSNYESDKAVVVYECLSEWG  
 QILCAICPNPKLVITGGFSTAICVWETGSSKEKAKSLTLKQALLGHTDAVTCLTASSAYHIVVSGSRDRTCIIWDLNKL S  
 FVTQLRGHRAPVSALCINELTGDIVSCAGTYIHVWSINGSPVASANTFTGRSQQLCCCVSEMNEWDTQNVIVTGHSDGV  
 VRFWRIEFLQVPETPAPEPIEPPDVPDCCGEIEGRDAPDEDSS ESEGEASLSQEPKPRSSNSQPSSAVHRPKPRTGASW  
 SVDSSSDSRRWSDTLSIDEKEGFVFN YSEGQVRPGVPVQPHSQQPSGSPHGPVPQPLQPSTMEARSYNKLKPGYRWER  
 QLVFRSKLTMHTAFDRKDNAHPAEITALAISKDHSKILVGDGRGRVFSWSVSDQPGRSTADHWVKDEQVDSCSGCTVRFS

LTERRHHCRNCGQVFCQKCSRQSEIKRLKISSPVRVCQNCYYNLQHERSSEENPRN

>XP\_017211768.1 WD repeat and FYVE domain-containing protein 3 isoform X2 [Danio rerio]

MLAEHRENSRAGFGLKKPLKMNMVKRIMGRPRQEECSPQDNALGLMHLRRLFSELCHPPRHMTQKEQEELKLYMMLPVFN  
R

VFGNAPPSTMNEKFSDLLQFTTQVSRLMVTEIRRRASNKSTEAASRAIVQFLEVNQSEETSRGWMLLTINLLASSGQKT  
VDCMTTMSVPSTLVKCLYLFFDLPHMPEVPAATQTELPLADRRALLQKVQILVKLCSFVSPAEEAQAQKDDLQLLFSAI  
TSWCPPHNLPWRKSAGEVLTISRHGLSVNVVKYIHEKECLSTCIQNMQQSDDLSPLEIVEMFAGLSCFLKDSSDVSQTL  
LDDFRMCQGYTFLIDLMIRLEQAKEDESKDALKDLVNLVTALT TYGVSELKPAGLTTGAPFLLPGFVVPQPSGKGHTVRN  
IQAFSVLQNAFLKAKSGRLARMILEAIAINYAADYANYFILEAQHTLSQFAERVTKLPEVQSKYFELLEFFVVFGLNYVPC  
KELFSVSVLLKSSTSYGCSITATRTLLKLGRHHPVFSDFREVGLLEVLVNLLHKYAALLKDPTQTHSDQGD SKNNVAEE  
QKQLAWLVMETLTVLLQGSNTNAGLFRFEGGARC VHNIVKYRQCREHALMIIQQLVLSPSGDDDMGTLLGLMHSAPTAE  
QLKTDILRALLAVLRESHRTRTVFRKVGGFVYVTSLLAMERSLCSPPIGVWEKVNQNKVFELLHTIFCTLTAAMRYEPA  
NSHFFRTEIQYEKLADAVRLLGCFSDAKKVGPA TVFPSNAQPFQRLLEDEIIPAENVCP TLKHCSKLFYMYKMATDSFD  
SRAEQVPPCLTHETSLPSPWGTPAITRKRHGYSSSSNSASGKALTDLKLHLGNSSQHSSDPVVIHPGAVLAMLDLLPSVS  
SDTQPEHALDLQLAVANILQLLVHSENRNQILCEAGLHSRLLRCSALGDEDHPLHPPLQRMFERLASQALEPMVLREF  
LRLGNPLNCGAWDKLLKQYRVHKPSSLSYEAEMRNSMTLSMEGFPGDSVFTINEDNSQYRISRSLVRS AEGSTVPLTRV  
KCLVSMTTPHDIRLHGSSVTPAFVELDTSLEGFGCLFLPSLAPHNAPSSNANTSGVSDGAVVSGMGNGERFFPPPSGLSY  
STWFCVERFSTPPQSHPVRLLT VVRRATSSEQHYVCLAIVLSAKDRSLIVSTKEELLQSYVDDFSEESSFYEILPCCARF  
RCADLITEGQWHHLLLVMSKGM LKNMATLYIDGQMVSTVKLHYVHN SPGGSASANPPV VSTVYSYIGTPPAQRQLSTLV  
WRLGP THFLEEVLPAASVA AIYELGPNYVGSFQAVYLPCKDSKTEAVPPCPVGLVPEEKVSFSLFAHSVSALTVA KIRKV  
YNKLDSKAIKQLGVSSHESATPVKL VHNAVGH LNGSARTVGA AVIGYLG VRAFVTKPVATNLQYIGGAAAILGLVAMAS  
DVEGLYAAVKALVCVVKSNPLASKEMERIKGYQLLAMLLKKKRPLLNSHILHLTFSLVGTVD SGHETSII PNSTAFQDLL  
CDFEVWLHAPYELHLSLFEHFIELLTESSEAAKNAKLLREFQLIPKLLLT LRDQSLSQPTITAIGNVLSLLLQGF PNTYD  
LLRFGQFISSTLPTFAVCEKFVIMENTNEEKIDRGAD EEFGLSSNLILLRNRLLDILLKQLFSCKEKGT VNAQACEEL  
VRTLGFDWLLMFMEEHHSSTVTAALLILV VLLSNQ SILSRFKEGLSGGGWLDHTDSVL TNKIGTVLG FNVGRSAGGRST  
LREINRDACHFPGF PVLQTLLPKHTNVPEIYFMLMALFFQQPITELPESLQVHFDLDSIWTFIFGV PASSATVVGSLHNM  
CTETAFLLLAMLRSMLNLPWQSEEEGSWLREYPITLMQFFRYLYHNIPDLAPMWHSPDFLCTLAATVFPFNIRPYSEMVS  
DLDD EASSPTEEFKAFVTD TGMNRSQSEYCNVGNKTYLTNHPAKKYVDFDMRLLIMDNLCMTPASKQTPIIDL LLEASPE  
RSTRTQQKEFQSYILDSVMEQLLAADVLMGEEASLPITTGGSYQVLVNNVFYFTQRVVDKLWQGMFNKESKL VVDFIVQL  
ITQSKRRSQGLSLDSVYHCLNRTILYQLSRPHKTV PQQVTLLDSL RVLT VNRNLVLGPGNHDQEFVACLAHCLINLHTGS  
SVEGFGLEAEARMTTWHVAVPSENE SDSVQSQDVSEGRQLLLKAVNRVWTELMH SKRQMLE DIFKVS LPPVNDRGHVDIGT  
ARPALEEPAAKSWQNHLVHEKKCISRGETVAPANQSKLSRVSSGFGLSKLTGSRRSKKESGMNKNNSAQET FQWMFTHI

AVVRDLVAMQYKEHQERQQNALKYVMDEWAGIEYELLRERGLWGPPIGSHLDKFQLDMTEGPCRMRKMMVRNDMFYIH  
YP

YVPDPEPNASTQKPARYRRAISYDSKEYYMRLLSGNPGMYQHSIEQNTEGETTQQEPEHGEDIARVKGLVKAPLKRSRS  
TADGADEESQDQLQELLES GAMDEEQKTDNTTLLRLLEEGEKIQHMYRCARVQGLDTSEGLLLFGKEHFYVIDGFTMTVT  
REIRDIETLPPNMHEPIIPRGARQSKSQLKRTCIFAYEDIREVHKRRYLLQPMAAEVFSGDGRNYLLAFQKGVRNKVYQ  
RFLAVVPSLADSSSVSGQRPNTSVEQGSGLLSTLVGEKSVTQRWERGEISNFQYLMHLNTLAGRSYNDLMQYPVFPWIL  
ADFDSEELDLNNPKTFRNLSKPMGAQTDDRLLIQYKKRFKDWEDPNGETPAYHYGTHYSSAMIVASYLVRMEPFTQIFLRL  
QGGHFDLADRMFHSVREAWLSASKHNMAADVKELIPEFFYLPEFLNSNNFDLGSKQNGTKLGDVILPPWAKGDPREFIRV  
HREALECDYVSAHLHEWIDLIFGYKQQGPPAVEAVNVFHHLFYEGQVDIYNINDPLKETATIGFINNFGQIPKQLFKKPH  
PPKRVRSSKNGEAPGGPVTNLSTLDKIFFHHLNLRPSLTPVKELKEPVGQIVCTDKGILAVEQNKVLVPPAWNKTFAWG  
YADLSCRLSNYESDKAVVVYECLSEWGQILCAICPNPKLVITGGFSTAICVWETGSSKEKAKSLTLKQALLGHTDAVTCL  
TASSAYHIVVSGSRDRTCIIWDLNKL SFVTQLRGHRAPVSALCINELTGDIVSCAGTYIHVWSINGSPVASANTFTGRSQ  
QILCCCVSEMNEWDTQNVIVTGHSDGVVRFWRIEFLQVPETPAPEPIEPPDVPDCCGEIEGRDAPDEDSSESEGEASLS  
QEPKPRSSNSQPSSAVHRPKPRTGASWSVDSSSDSRRWSDTLSIDEKEGFVFNYSSEGQVRPGVPVQPHSQPSGPHG  
PVPQPLQPSTMEARSYNKLKPGYRWERQLVFRSKLTMHTAFDRKDNAHPAEITALAISKDHSKILVGDGRGRVFSWSVSD  
QPRSTADHWVKDEQVDS CSGCTVRFSLTERRHHCRCNGQVFCQKCSRQSEIKRLKISSPVRVCQNCYYNLQHRSSEE  
NPRN

>XP\_005165446.1 WD repeat and FYVE domain-containing protein 3 isoform X1 [Danio rerio]

MLAEHRENSRAGFGLKKPLKMNVMKRIMGRPRQEECSPQDNALGLMHLRRLFSELCHPPRHMTQKEQEEKLYMMLPVFN  
R

VFGNAPPSTMNEKFSDLLQFTTQVSRLMVTEIRRRASNKSTEAAASRAIVQFLEVNQSEETSRGWMLLTINLLASSGQKT  
VDCMTTMSVPSTLVKCLYLFFDLPHMPEVPAATQTELPLADRRALLQKV FVQILVKLCSFVSPAEE LAQKDDLQLLFSAI  
TSWCPPHNLPWRKSAGEVLTISRHGLSVNVVKYIHEKECLSTCIQNMQQSDDLSPLEIVEMFAGLSCFLKDSSDVSQTL  
LDDFRMCQGYTFLIDLMIRLEQAKEDESKDALKDLVNLVTALTTYGVSELKPAGLTTGAPFLLPGFVVPQPSGKGHTVRN  
IQAFSVLQNAFLKAKSGRLARMILEAIANIYAADYANYFILEAQHTLSQFAERVTKLPEVQSKYFELLE FVVFGLNYVPC  
KELFSVSVLLKSSTS YGCSITATRTLLKLGRHHPVFSDFREVGLLEV LVNLLHKYAALLKDPTQTHSDQGD SKNNVAEE  
QKQLAWLVMETLTVLLQGSNTNAGL FREFGGARC VHNIVKYRQCREHALMIIQQLV LSPSGDDDMGTLLGLMHSAPT AEL  
QLKTDILRALLAVLRESHRTRTVFRKVGGFVYVTSLLAMERSLCSPPVIGWEKVNQNKVFELLHTIFCTLTAAMRYEPA  
NSHFFRTEIQYEKLADAVRLLGCFSDAKKVG PATVFP SNAQPFQRLLEDEIIPAENV CPTLKHCSKLFYIMYKMATDSFD  
SRAEQVPPCLTHETSLPSPWGTPAITRKS RHGYSSSSNSASGKALTDLKLHLGNSSQHSSDPVVIHPGAVLAML DLLPSV  
SSDTQPEHALDLQLAVANILQLLVHSERNQILCEAGLHSRLLQRCSCALGDEDHPLHPPLQRMFERLASQALEPMVLRE  
FLRLGNPLNCGAWDKLLKQYRVH KPSSLSYEAEMRNSMTLSMEGF GPDSVFTINEDNSQYRISRSLV RSAEGSTVPLTR  
VKCLVSM TTPHDIRLHGSSVTPAFVELDTSLEGFGCLFLPSLAPHNAPSSNANTSGVSDGAVVSGMGNGERFFPPPSGLS

YSTWFCVERFSTPPQSHPVRLLTVVRRTSSEQHYVCLAIVLSAKDRSLIVSTKEELLQSYVDDFSEESSFYEILPCCAR  
 FRCADLITEGQWHHLLLVMASKGMLKNSMATLYIDGQMVSTVKLHYVHNSPGGSASANPPVVSTVYSYIGTPPAQRQLSTL  
 VWRLGPTHFLEEVLPAAASVAIYELGPNYVGSFQAVYLPCKDSKTEAVPPCPVGLVPEEKVSFSLFAHSVSALTVAKIRK  
 VYNKLDKAIKQLGVSSHESATPVKL VHNAVGHNGSARTVGA AVIGYLGVR AFVTKPVATNLQYIGGAAAILGLVAMA  
 SDVEGLYAAVKALVCVVKSNPLASKEMERIKGYQLLAMLLKKKRPLLNSHILHLTFSLVGTVD SGHETSII PNSTAFQDL  
 LCDFEVWLHAPYELHLSLFEHFIELLTESSEAAKNAKLLREFQLIPKLLLTLDQSLSQPTITAIGNVLSLLLQGFNTY  
 DLLRFGQFISSTLPTFAVCEK FVIMENTNEEKIDRGAD EEF GGLSSNLILLNRLLDILLKQLFSCKEKGT VNAQACEE  
 LVRTLGF DWLLMFMEHHHSSTVTAALLILVLLSNQSILSRFKEGLSGGGWLDHTDSVLTNKIGTVLGFNVGRSAGGRS  
 TLREINRDACHFP GF PVLQTL L PKHTNVPEIYFMLMALFFQQPITELPESLQVHFDLDSIWTFIFGVPASSATVVGSLHN  
 MCTETAFLLLAMLR SMLNLPWQSEEEG SWLREYPITLMQFFRYLYHNIPDLAPMWHSPDFLCTLAATVFPFNIRPYSEMV  
 SDDLDEASSPTEEFKAFVTD TGMNRSQSEYCNVGNKTYLTNHPAKKYVFDFMRLLIMDNLCMTPASKQTPIIDLLLEASP  
 ERSTRTQQKEFQSYILDSVMEQLLAADVLMGEEASLPITTGGSYQVLVNNVFYFTQRVVDKLWQGMFNKESKLVVD FIVQ  
 LITQSKRRSQGLSLDSVYHCLNRTILYQLSRPHKTVPPQVTL LDSLRLVTNVRNLVLGPGNHDQEFVACLAHCLINLHTG  
 SSVEGFGLEAEARMTTWHVAVPSENE SDSVQSQDVSEGRQLLLKAVNRVWTELMH SKRQMLEDIFKVS L P V N D R G H V D I G  
 TARPAALEPAAKSWQNHLVHEKKCISRGETVAPANQSKLSRVSSGFGLSKLTGSRRSKKESGMNKNNL SAQETFQWMFTH  
 IAVVRDLVAMQYKEHQERQQNALKYVMDEWAGIEYELLRERGLWGPPIGSHLDKFQLDMTEGPCRMRK KMVRNDMFYIH  
 Y  
 PYVPDPEPNASTQKPARYRRAISYDSKEYYMRLLSGNPGMYQHSIEQNTEGETTQQEPEHGEDIARVKGLVKAPLKRSR  
 STADGADEESQDQLQELLES GAMDEEQKTDNTLLRLLEEGEKIQHMYRCARVQGLD TSEG LLLFGKEHFYVIDGFTMTV  
 TREIRDIETLPPNMHEPIIPRGARQSKSQLKRTCSIFAYEDIREVHKRRYLLQPMAAEVFSGDGRNYLLAFQKGVRNKVY  
 QRFLAVVPSLADSSSVSGQRPNTSVEQGSGLLSTLVGEKSVTQRWERGEISNFQYLMHLNTLAGRSYNDLMQYPVFPWI  
 LADFDSEELDLNNPKTFRNL SKPMGAQTDDR LIQYKKRFKDWEDPNGETPAYHYGTHYSSAMIVASYLVRMEPFTQIFLR  
 LQGGHFDLADRMFHSVREAWLSASKHNMA DVKELIPEFFYLPEFLLNSNNFDLGSKQNGTKLGDVILPPWAKGDPREFIR  
 VHREALECDYVSAHLHEWIDLIFGYKQQGPPAVEAVNVFHHLFYEGQVDIYNINDPLKETATIGFINNFQGIPKQLFKKP  
 HPPKRVRSKSNGEAPGGPVTLNSTLDKIFFHLDNLRPSLTPVKELKEPVGQIVCTDKGILAVEQNKVLVPPAWNKTFAW  
 GYADLSCRLSNYESDKAVVVYECLSEWGQILCAICPNPKLVITGGFSTAICVWETGSSKEKAKSLTLKQALLGHTDAVTC  
 LTASSAYHIVVSGSRDRTCHWDLNKL SFVTQLRGHRAPVSALCINELTGDIVSCAGTYIHVWSINGSPVASANTFTGRS  
 QQILCCCVSEMNEWD TQNVI VTGHSDGVVRFWRIEFLQVPETPAPEPIEPPDVPDCCGEIEGRDAPDEDSSESEGE EASL  
 SQEPKPRSSNSQPSSAVHRPKPRTGASWSVDSSSDSRRWSDTL SIDEKEGFVFN YSEGGVVRPGVPVQPHSQPPSGPSH  
 GPVPQPLQPSTMEARSYNKLKPGYRWERQLVFRSKLT MHTAFDRKDNAHPAEITALAISKDHSKILVGDGRGRVFSWSVS  
 DQPGRSTADHWVKDEQVDSCSGCTVRFSLTERRHHCRNCGQVFCQKCSRFQSEIKRLKISSPVRVCQNCYYNLQHERSSE  
 ENPRN

>XP\_017211769.1 WD repeat and FYVE domain-containing protein 3 isoform X3 [Danio rerio]



MLAEHRENSRAGFGLKKPLKMNMVKRIMGRPRQEECSQDNALGLMHLRRLFSELCHPPRHMTQKEQEEKLYMMLPVFN  
R  
VFGNAPPSTMNEKFSDLLQFTTQVSRLMVTEIRRRASNKSTEAASRAIVQFLEVNQSEETSRGWMLLTINLLASSGQKT  
VDCMTTMSVPSTLVKCLYLFFDLPHMPEVPAATQTELPLADRRALLQKVVFVQILVKLCSFVSPAEEAQAQKDDLQLLFSAI  
TSWCPPHNLPWRKSAGEVLTITSRHGLSVNVVKYIHEKECLSTCIQNMQQSDDLSPLEIVEMFAGLSCFLKDSSDVSQTL  
LDDFRMCQGYTFLIDLMIRLEQAKEDESKDALKDLVNLVTALTTYGVSELKPAGLTGAPFLLPGFVVPQPSGKGHTVRN  
IQAFSVLQNAFLKAKSGRLARMILEAIANIYAADYANYFILEAQHTLSQFAERVTKLPEVQSKYFELLEFFVVFGLNYVPC  
KELFSVSVLLKSSTSYGCSITATRTLLKLGRHHPVFSDFREVGLLEVLVNLHLYAALLKDPTQTHSDQGDSKNNVAEE  
QKQLAWLVMETLTVLLQGSNTNAGLFREFGGARCVHNIVKYRQCREHALMIIQQLVLSPSGDDDMGTLLGLMHSAPTAE  
QLKTDILRALLAVLRESHRTRTVFRKVGGFVYVTSLLAMERSLCSPPVIGWEKVNQNKVFELLHTIFCTLTAAMRYEPA  
NSHFFRTEIQYEKLADAVRLLGCFSDAKKVGPA TVFPSNAQPFQRLLEDEIIPAENVCP TLKHCSKLFYMYKMATDSFD  
SRAEQVPPCLTHETSLPSPWGTPAITRKS RHGYSSSSNSASGKALTDLKLHLGNSSQHSSDPVVIHPGAVLAMLDLLPSV  
SSDTQPEHALDLQLAVANILQLLVHSERNQQILCEAGLHSRLLQRCSCALGDEDHPLHPPLQRMFERLASQALEPMVLRE  
FLRLGNPLNCGAWDKLLKQYRVHVKPSSLSYEAEMRNSMTLSMEGFGPDSVFTINEDNSQYRISRSLVRS AEGSTVPLTR  
VKCLVSMTPPHDIRLHGSSVTPAFVELDTSLEGFGCLFLPSLAPHNAPSSNANTSGVSDGAVVSGMGNGERFFPPPSGLS  
YSTWFCVERFSTPPQSHPVRLLTVVRRATSSEQHYVCLAIVLSAKDRSLIVSTKEELLQSYVDDFSEESSFYEILPCCAR  
FRCADLITEGQWHHLLLVM SKGMLKNSMATLYIDGQM VSTVKLHYVHNSPGGSASANPPVVSTVYSYIGTPPAQRQLSTL  
VWRLGPTHFLEEVLPAA SVA AIYELGP NYVGSFQAVYLPCKDSKTEAVPPCPVGLVPEEKVSFSLFAHSVSALTVA KIRK  
VYNKLD SKAI AKQLGVSSHESATPVKL VHNAVGH LNGSARTVGA AVIGYLG VRA FVT KPVATNLQYIGGAAAILGLVAMA  
SDVEGLYAAVKALVCVVKSNPLASKEMERIKGYQLLAMLLKKKRPLLNSHILHLTFSLVGTVD SGHETSIPNSTAFQDL  
LCDFEVWLHAPYELHLSLFEHFIELL TESSEAAKNAKLLREFQLIPKLLLT LRDQSLSQPTITAIGNVL SLLLQGFNTY  
DLLRFGQFISSTLPTFAVCEKFVIMENTNEEKIDRGADEEFGGLLSSNLILLRNRLLDILLKQLFSCKEKGT VNAQACEE  
LVRTLGF DWLLMFMEEHHSSTVTAALLILV VLLSNQSILSRFKEGLSGGGWLDHTDSVLTNKIGTVLGFNVGRSAGGRS  
TLREINRDACHFPGFPVLQTLLPKHTNVPEIYFMLMALFFQQPITELPESLQFDLDSIWTFIFGV PASSATVVGSLHNC  
TETAFLLLAMLR SMLNLPWQSEEEG SWLREYPITLMQFFRYLYHNIPDLAPMWHSPDFLCTLAATVFPFNIRPYSEM VSD  
LDDEASSPTEEFKAFVTD TGMNRSQSEYCNVGNKTYLTNHPAKKYVFDFMRLLLIMDNLCMTPASKQTPIIDLLEASPER  
STRTQQKEFQSYILDSVMEQLLAADVLMGEEASLPITGGSYQVLVNNVFYFTQRVVDKLWQGMFNKESKL VVDFIVQLI  
TQSKRRSQGLSLDSVYHCLNRTILYQLSRPHKTVPQQVTLLDSLRLVLT VNRNLVLGPGNHDQEFVACLAHCLINLHTGSS  
VEGFGLEAEARMTTWHVAVPSENE SDSVQSQDVSEGRQLLLKAVNRVWTELMH SKRQMLE DIFKVS L P VNDRGHVDIGTA  
RPALEEPAAKSWQNH LVHEKKCISRGETVAPANQSKLSRVSSGFGLSKLTGSRRSKKESGMNKNNSAQETFQWMFTHIA  
VVRDLVAMQYKEHQRQQNALKYVMDEWAGIEYELLRERGLWGPPIGSHLDKFQLDMTEGPCRM RKKMVRNDMFYIHY  
PY  
VPDPEPNASTQKPARYRRAISYDSKEYYMRLLSGNPGMYQHSIEQNTEGETTQQEPEHGEDIARVKGLVKAPLKRSRST

ADGADEESQDQLQELLES GAMDEEQKTDNTTLLRLLEE GEEKIQHMYRCARVQGLDTSEGLLLFGKEHFYVIDGFTMTVTR  
EIRDIE TLPPNMHEPIIPRGARQSKSQLKRTC SIFAYEDIREVHKRRYLLQPMAAEVFSGDGRNYLLAFQKGVRNKVYQR  
FLAVVPSLADSSSVSGQRPNTSVEQGSGLLSTLVGEKSVTQRWERGEISNFQYLMHLNTLAGRSYNDLMQYPVFPWILA  
DFDSEELDLNNPKTFRNLSKPMGAQTDDR LIQYKKRFKDWEDPNGETPAYHYGTHYSSAMIVASYLVRMEPFTQIFLRLQ  
GGHFDLADRMFHSVREAWLSASKHNMADV KELIPEFFYLPEFLLNSNNFDLGSKQNGTKLGDVILPPWAKGDPREFIRVH  
REALECDYVSAHLHEWIDLIFGYKQQGPPAVEAVNVFHHLFYEGQVDIYNINDPLKETATIGFINNFQIPKQLFKKPHP  
PKRVRSKSNGEAPGGPVTLNSTLDKIFFHHLDNLRPSLTPVKELKEPVGQIVCTDKGILAVEQNKVLVPPAWNKTFAWGY  
ADLSCRLSNYESDKAVVVYECLSEWGQILCAICPNPKLVITGGFSTAICVWETGSSKEKAKSLTLKQALLGHTDAVTCLT  
ASSAYHIVVSGSRDRTCIIWDLNKL SFVTQLRGHRAPVSALCINELTGDIVSCAGTYIHVWSINGSPPVASANTFTGRSQQ  
ILCCCVSEMNEWD TQNVIVTGHSDGVVRFWRIEFLQVPETPAPEPIEPPDVPDCCGEIEGRDAPDEDSSESEGE EASLSQ  
EPKPRSSNSQPSSAVHRPKPRTGASWSVDSSSDDSRRWSDTL SIDEKEGFVFNYS EGQVRPGVPVQPHSQPSGSPSHGP  
VPQPLQPSTMEARSYNKLKPGYRWERQLVFRSKLTMHTAFDRKDNAHPAEITALAISKDHSKILVGDGRGRVFSWSVSDQ  
PGRSTADHWVKDEQVDSCSGCTVRFSLTERRHHCRNCGQVFCQKCSR FQSEIKRLKISSPVRVCQNCYYNLQHERSSEEN  
PRN

>XP\_001921741.4 WD repeat and FYVE domain-containing protein 3 isoform X4 [Danio rerio]

MNMVKRIMGRPRQE ECSPQDNALGLMHLRRLFSELCHPPRHMTQKEQE EKLYMMLPVFN RVFGNAPPSTMNEKFSDLLQF  
TTQVSRLMVTEIRRRASNKSTEAA SRAIVQFLEVNQSEETS RGWMLLTINLLASSGQKTVD CMTTMSVPSTLVKCLYLF  
FDLPHMPEVPAATQTELPLADRRALLQKV FVQILVKLCSFVSPA EELAQA KDDLQLLFSAITSWC PPHNLPWRKSAGEVLT  
TISRHGLSVNVVKYIHEKECLSTCIQNMQQSDDLSPLEIVEMFAGL SCFLKDSSDVSQTL LDDFRMCQGYTFLIDLMIRL  
EQAKEDESKDALKDLVNLVTAL TTYGVSELKPAGLTTGAPFLLPGFVVPQPSGKGHTVRNIQAFSVLQNAFLKAKSGRLA  
RMILEA IANIYAADYANYFILEAQHTLSQFAERVTKLPEVQSKYFELLE FVVFGLNYVPCKELFSVSVLLKSSTS YGCSI  
TATRTLLKLGRHHPVFSDVFREVGLLEVLVNL LHKYAALLKDPTQTHSDQGD SKNNVAEEQKQLAWLVMETLTVLLQGSN  
TNAGLFREFGGARCVHNIVKYRQCREHALMIIQQLVLSPSGDDDMGTLLGLMHSAPTAELQLKTDILRALLAVLRESHRT  
RTVFRKVGGFVYVTSLLLAMERSLCSP PVIGWEKVNQNKVFELLHTIFCTLTAA MRYEPANSHFFRTEIQYEKLADAVRL  
LGCFSDAKKVGPATVFP SNAQPFQRLLEDEIIPAENVCPTLKHCSKLFIYMYKMATDSFDSRAEQVPPCLTHETSLPSPW  
GTPAITRKS RHGYSSSSNSASGKALTDLKLHLGNSSQHSSDPVVIHPGAVLAML DLLPSVSSDTQPEHALDLQLAVANIL  
QLLVHSERNQQILCEAGLHSRLLQRCSCALGDEDHPLHPPLQRMFERLASQALEPMVLREFLRLGNPLNCGAWDKKLLKQ  
YRVHKPSSLSYEAEMRNSMTLSMEGF GPDVSFTINEDNSQYRISRSLVRS AEGSTVPLTRVKCLVSM TTPHDIRLHGSSV  
TPAFVELDTSLEGFGCLFLPSLAPHNAPSSNANTSGVSDGAVVSGMGNGERFFPPPSGLSYSTWFCVERFSTPPQSHPVR  
LLTVVRRATSSEQHYVCLAIVLSAKDRSLIVSTKEELLQSYVDDFSEESSFY EILPCCARFRCADLITEGQWHHLLVMS  
KGMLKNSMATLYIDGQMVSTVKLHYVHN SPGGSASANPPVVSTVYSYIGTPPAQRQLSTLVWRLGPTHFLEEVLPAASVA  
AIYELGP NYVGSFQAVYLPCKDSKTEAVPPCPVGLVPEEKVSFSLFAHSVSALTVA KIRKVYNKLD SKAIAKQLGVSSHE  
SATPVKLVHNAVGH LNGSARTVGA AVIGYLG VRA FVTKPVATNLQYIGGAAAILGLVAMASDVEGLYAAVKALVCVVKSN

PLASKEMERIKGYQLLAMLLKKKRPLLNSHILHLTFSLVGTVDSGHETSIIPNSTAFQDLLCDFEVWLHAPYELHLSLFE  
 HFIELLTESSEAAKNAKLLREFQLIPKLLLTLRDQSLSQPTITAIGNVLSLLLQGFNPNTYDLLRFGQFISSTLPTFAVCE  
 KFVIMENTNEEKIDRGADDEFGGLSSNLILLRNRLLDILLKQLFSCKEKGTVNAQACEELVRTLGFDWLLMFMEEHHS  
 STVTAALLILVVLSSNQSILSRFKEGLSGGGWLDHTDSVLTKIGTVLGFNVGRSAGGRSTLREINRDACHFPGFPVLQT  
 LLPKHTNVPEIYFMLMALFFQQPITELPESLQVHFDLDSIWTFIFGVPASSATVVGSLHNMCTETAFLLLAMLRSMLNLP  
 WQSEEEGSWLREYPITLMQFFRYLYHNIPDLAPMWHSPDFLCTLAATVFPFNIRPYSEMVSDDLDEASSPTEEFKAFVTD  
 TGMNRSQSEYCNVGNKTYLTNHPAKKYVDFDMRLLIMDNLCTPASKQTPIIDLLLEASPERSTRTQQKEFQSYILDSVM  
 EQLLAADVLMGEEASLPITTGGSYQVLVNNVFYFTQRVVDKLWQGMFNKESKLVDVFIVQLITQSKRRSQGLSLDSVYHC  
 LNRTILYQLSRPHKTVPPQQVTLLDSLRLVTVNRNLVLGPGNHDQEFVACLAHCLINLHTGSSVEGFGLAEARMTTWHVA  
 VPSENESDSVQSQDVSEGRQLLLKAVNRVWTELMHRSKQMLEDFKVSPLVNDRGHVVDIGTARPALEEPAKSWQNHVH  
 EKKCISRGETVAPANQSKLSRVSSGFGLSKLTGSRSSKESGMNKNLSAQETFQWMFTHIAVVRDLVAMQYKEHQERQQ  
 NALKYVMDEWAGIEYELLRERGLWGPPIGSHLDKFQLDMTEGPCRMRKMMVRNDMFYIHYPYVPDPEPNASTQKPARYRR  
 AISYDSKEYYMRLLSGNPGMYQHSIEQNTGETTQQEPEHGEDIARVKGLVKAPLKRSRSTADGADEESQDQLQELLES  
 GAMDEEQKTDNTTLLRLLEEGERKIQHMYRCARVQGLDTSEGLLLFGKEHFYVIDGFTMTVTREIRDIETLPPNMHEPIIP  
 RGARQSKSQLKRTCSIFAYEDIREVHKRRYLLQPMAAEVFSGDGRNYLLAFQKGVNRNKVYQRFLAVVPSLADSSSVSGQ  
 RPNTSVEQSGLLSTLVGEKSVTQRWERGEISNFQYLMHLNLAGRSYNDLMQYPVFPWILADFDSEELDLNNPKTFRNL  
 SKPMGAQTDDRILQYKKRFKDWEDPNGETPAYHYGTHYSSAMIVASYLVRMEPFTQIFLRLQGGHFDLADRMFHSVREAW  
 LSASKHNMADVKELIPEFFYLPEFLLNSNNFDLGSKQNGTKLGDVILPPWAKGDPREFIRVHREALECDYVSAHLHEWID  
 LIFGYKQQGPPAVEAVNVFHHLFYEGQVDIYNINDPLKETATIGFINNFGQIPKQLFKKPHPPKRVRSKSNGEAPGGPVT  
 LNSTLDKIFFHHLNLRPSLTPVKELKEPVGQIVCTDKGILAVEQNKVLVPPAWNKTFAWGYADLSCRLSNYESDKAVVV  
 YECLSEWGQILCAICPNPKLVITGGFSTAICVWETGSSKEKAKSLTLKQALLGHTDAVTCLTASSAYHIVVSGSRDRTCI  
 IWDNLKLSFVTQLRGHRAPVSALCINELTGDIVSCAGTYIHVWSINGSPVASANTFTGRSQILCCCVSEMNEWDTONVI  
 VTGHSDGVVRFWRIFLQVPETPAPEPIEPPDVPDCCGEIEGRDAPDEDSSESEGEASLSQEPKPRSSNSQPSSAVHRP  
 KPRTGASWSVDSSSDSRRWSDTLSIDEKEGFVFNYSSEGQVRPGVPVQPHSQPSGSPHGPVPQPLQPSTMEARSYNKL  
 KPGYRWERQLVFRSKLTMHTAFDRKDNAPAEITALAISKDHSKILVGDRGRVFSWSVSDQPGRSTADHWVKDEQVDSC  
 SGCTVRFSLTERRHHCNCGQVFCQKCSRQSEIKRLKISSPVRVCQNCYYNLQHERSSEENPRN

>NP\_001292489.1 zinc finger FYVE domain-containing protein 26 [Danio rerio]

MHPFGREEETSRELFGFFRRCLQRGEWELAAACVSQLGEEAEDPHSPRDIVKAIVTHPYPLRWETVGSPLRLAWYWLQ  
 VLERPTEIKVSVSVKRELEFLLLEEDIPQSVLKEHFAFLYSEEVKGKAPGDSASPLSAALLSCLRSLLTRQQPRCL  
 HSLISFLSNGDPSRDHTLQDAFIQHLTEQVKVPAKDRNREWVEQVCSVLALAPWGSDRSGAQLEPLWEGLWAAREGLMTE  
 ERILGCLLRPQSQALLMAYSSALRLLKDKLLAEAPHTQVDLPDLERVMLGLCCHKDKRLAWKAIYFECLSSGKHFLEQV  
 LLTGLDLIKREEFSKLETLLHSEFQPLSRLLLLLGWMHCQSLESATLLTVLHHRQPQSNDALSIDLACTLSCQLGVLEW  
 CTQNNPGISHDALLSHLHMLDHHSALYVLHCLTPLAKFEEHKVLELLQRTGDPSQVDSPSSSVQRNITLFRGFCAMKYAL

Y AISVNARTHAHTGSLDCEPLHELQTEAAQEDETAEGCSNLFQHYLEAVPALFRLELLENIFSLLFLSDSDFT  
 QQTSTATETQPYTNTETSKPKSTKEVNTAEHFLKAENEGERMDELNQINPQLGHLTSGCRGFLVDLNVMEGILRLVREGL  
 EGVCVGVQEDGRALGADVELAESLGCSVTAETFSARLQRLSKYTAEAWRLQIVTSNHGNGNDGLYLPSPLPSPALPLKR  
 QGSGSSGTSSRRRRKHHRHRSERHVSSERQNGEVSTSTSDGGVCVSVVCRGTETCPCGGSHSWLVPAMLSPPESLLIACI  
 RRGNYIEAQQVIAMYGLENSECAGELVFMDRYREVLIELAQVEQKIESQSLSTSSSSSEGLGTLGATPAGRTRMGSSSRL  
 TLKSIGSAAAAGMAFYSSISDVADRLMSTPSRPIPCLEDSYWLSQCTIDSPDFVRPLVEELSPAAMAAFDLSCCQCQLWKT  
 SRQLETAERRLSSFLEARGVRVDPKVPHANGIRGFPSVLQQISKILNKTSTNKGMSKTDNNGEENAVCSPFGCSAQEVL  
 LSCHSTLTEESITIQQNLNQRLEVTLQTLSSATNTSVDSL VGSNLLTALAEQAALKQSELDCHPVRTAMKQLLQYLDQLC  
 PLVPDGAPDRPDYIRSFFDYVNVLASVLVRSLSGEDQSTVVKLGNPLLLLLQSPAQLLSHLLFDRQVSPDRVLSLLQQR  
 LRLSVQQVVVQRC CETLPLWDSRAVNFSQRVSGLNNGGAFCPASIASILQQYAQDCSPSLDLSPTTTS DPSSSESEVSVED  
 VSAASTSLSTSPSPSSSSPSSSFLTPSALSFLKSR SPLVAALACLSASRGGVTRVTSSGWSGLPSYFRGSGRKEAVLD  
 GEQISREGEALLKNFPILRMYLRTMAEPVLGVSLADEGLGVALCGKPVVGMFLFSGLQGNAQAAMAAEFQQALNNGDLN  
 RALDLELYAQPCSQEGALRDKLLAFTALQESSAEQLFRVRDWELRGRVVLQGLDRWPLQQCLDLLHFCLSDQNTK DPL  
 REQLQQRKQELDMYQRMLRLQPSLPWETWQELREESTKNPESVFSQMLEAREFELCAQWVQLYSVSDQSGMQLQTEHLLY  
 LLEHNHTEEAQFQLEALSDSMGLEVSERALDRRPGLAACHFLSDYLT LHFQSQMTPARRRHIALHLGSKVLLTLPEASR  
 QDYFSLSDPLLMEQMLMNLKVDWAAVAITTLRSLLLAQDAGITTQHIDTLLADYARKALDFPYAPREWSRSDSVISLQ  
 DAFLQCPAQESCPSSPSHTPPPSTGGTPMQTPSSERRPSGKKIRPLATPFTPPEKTPDRKD WIPDHKQHICMVCQRRFT  
 MFNRRHHCRRCGRLVCHSCSSKKMAVAGFDEPVRVCDQCYNFFHTDSDEELEQGEAGSPSSIDEVLNGVLSLPEVSRKQY  
 RLSPNPAENQQLKSEFYEQAPSASLCVAILTLHSDHAACGQQQLIDHCRSLSRKLTNPEVDARLLTDVMRQLLFSAKLMF  
 VNAGCTQEPALCDSYISKVDVLKILVTANYKYIPSLDDIQUETA AVTRLRNQLELEYQLAVEVSTKSALDPNGVWQAWA  
 MASLKAGNLSGAREKFVRCLKAPVDRNQLNHGPRLLQEIIQHLESTVKLTLSQTMD EDILASLRELEEALSDSAPPEGTE  
 SKVQRCNFHQECLFYLFYTGTHLSLISFYLRHDCLKDALTYLQNKGCSDDV FLEGIFQPCLERGR LGALQGLENLDPTL  
 ETWGRYLLSACQLLQRRGHYHSLYQLQQFMMDHIRAAMTCIRFFSHGAQSYLQLGEQQRWLIRAKEHLR TYLQEQQSRRK  
 SHSSSFRKKMSSTDVSRHIHTIELQLEVTRFLHRCSSPSKTAVGSTYTGN SAPPTLFGNSPMKVDVACKVMLGGKNIEE  
 GFGIAYRVIQDFQLEALAVYIRVGQRLVRQRQYSSVRQLHKCVGESGTASKHDCDAIVLSCVSVADKSPADAKELETIL  
 ECKNPENKIKAYLQCSKLRAAYLQAVKLKLVKATPLIQEVMRAAESSGDSVMHDICRQWLSEHQEPSSKQR

>XP\_003199781.2 zinc finger FYVE domain-containing protein 26 isoform X3 [Danio rerio]

MHPFGREEETSRELFGFFRRCLQRGEWELAAACVSQ LGEARAEDPHSPR DIVKAIVTHPYPLRWETVGS PHRLAWYWLQ  
 VLERPTEIKVSVSVKRELEFLLLLLEELEDIPQSVL KELHEAFLYSEEVKGKAPGDSASPLSAALLSCLRSLLTRQQPRLC  
 HSLISFLSNGDPSRDHTLQDAFIQHLTEQVKVPAKDRNREWVEQVCSVLALAPWGSDRSGAQLEPLWEGLWAAREGLMTE  
 ERILGCLLRPQSQALLMAYSS TALRLLKDKLLAEAPHTQVDLPDLERVMLGLCCHKDKRLAWKAIYFECLSSGKHFLEQV  
 LLTGLDLIKREEFSKLETLLHSEFQPLSRLLLLLL GWMHCQSLES AKTLLTVLHHRQPQSND SALS DLACTLSCQLGVLEW  
 CTQNNPGISHDALLSHLHMLDHHSALYVLHCLT PLAKFEEHKVLELLQRTGDPSQVDSPSSSVQRNITLFRGFCAMKYAL

YAISVNARTHAHTGSLDCEPLHELQTEAAQEDETAEGCSNLFQHYLEAVPALFRLELLENIFSLLFLSDSDFT  
 QQTSTATETQPYTNTETSKPKSTKEVNTAEHFLKAENEGERMDELNQINPQLGHLTSGCRGFLVDLNVMEGILRLVREGL  
 EGVCVGVQEDGRALGADVELAESLGCSVTAETFSARLQRLSKYTAEAWRLQIVTSNHGNGNDGLYLPSPLPSPALPLKR  
 QGSGSSGTSSRRRRKHHRHRSERHVSSERQNGEVSTSTSDGGVCVSVVCRGTETCPCGGSHSWLVPAMLSPPESLLIACI  
 RRGNYIEAQQVIAMYGLENSECAGELVFMDRYREVLIELAQVEQKIESQSLSTSSSSSEGLGTLGATPAGRTRMGSSSRL  
 TLKSIGSAAAAGMAFYISDVADRLMSTPSRPIPCLEDSYWLSQCTIDSPDFVRPLVEELSPAAMAAFDLSCCQCQLWKT  
 SRQLETAERRLSFLEARGVRVDPKVPHANGIRGFPSVLQQISKILNKTSTNKGMSKTDNNGEENAVCSPFGCSAQEVL  
 LSCHSTLTEESITIQQNLNQRLEVTLQTLSSATNTSVDSLVGSNLLTALAEQAALKQSELDCHPVRTAMKQLLQYLDQLC  
 PLVPDGAAPDRPDYIRSFDDYVNVLASVLRSLGSEDQSTVVKLGNPLLLLLQSPAQLLSHLLFDRQVSPDRVLSLLQQR  
 LRLSVQQVVVQRCCELTPLWDSRAVNFSQRVSGLNGGAFCPASIASILQQYAQDCSPSLDLSDPTTSDPSSESESVED  
 VSAASTSLSTSPSPSSSSPSSSFLTPSALSFLKSRSLVAALACLSASRGGVTRVTSSGWSGLPSYFRGSGRKEAVLD  
 GEQISREGEALLKNFPILRMYLRTMAEPVLGVSLADEGLGVALCGKPVVGMFLSGLQGNAQAAMAAEFQQAALNNGDLN  
 RALDLLELYAQPCSQEGALRDKLLAFTALQESSAEQLFRVRDWELRGRVVLQGLDRWPLQQCLDLLHFCLSDQNTKDPL  
 REQLQQRKQELDMYQRMLRLQPSLPWETWQELREESTKNPESVFSQMLEAREFELCAQWVQLYSVSDQSGMQLQTEHLLY  
 LLEHNHTEEAQFQLEALSDSMGLEVSERALDRRPGLAACHFLSDYLT LHFQSQMTPARRRHIALHLGSKVLLTLPEASR  
 QDYFSLSDPLLMEQMLMNLKVDWAAVAITTLRSLLLAQDAGITTQHIDTLLADYARKALDFPYAPREWSRSDSVISLQ  
 DAFLQCPAQESCPSSPSHTPPSTGGTPMQTPSSERRPSGKKIRPLATPFTPPEKTPDRKDWIPDHKQHICMVCQRRFT  
 MFNRRHHCRRCGRLVCHSCSSKKMAVAGFDEPVRVCDQCYNFFHTDSDEELEQGEVAGSPSSIDEVLNGVLSLPEVSRKQ  
 YRLSPNPAENQQLKSEFYEQAPSASLCVAILTLHSDHAACGQQIDHCRSLSRKLTNPEVDARLLTDVMRQLLFSAKLM  
 FVNAGCTQEPALCDSYISKVDVLKILVTANYKYIPSLDDIQUETAAVTRLRNQLELEYQLAVEVSTKSALDPNGVWQAW  
 AMASLKAGNLGAREKFVRCLKAPVDNRNLNHGPRLLQEIIQHLESTVKLTLSQTMDEDILASLRELEEALSDSAPPEGT  
 ESKVQRCNFHQECLFYLFYTGTHLSLISFYLRHDCLKDALTYLQNKGCSDDVFLGIFQPCLERGRLGALQGLLENLDPT  
 LETWGRYLLSACQLQRRGHYHSLYQLQQFMMDHIRAAMTCIRFFSHGAQSYLQLGEQQRWLIRAKEHLRTYLQEQSRR  
 KSHSSFRKKMSSTDVSRHIHTIELQLEVTRFLHRCESSPSKTAVGSTYTGNSAPPTLFGNSPMKVDVACKVMLGGKNIE  
 EGFGIAYRVIQDFQLEALAVYIRVGQRLVRQRQYSSVRQLHKCVGESGTASKHDCDAIVLSCVSVADKSPADAKELETLI  
 LECKNPENKIKAYLQCSKLRAAYLQAVKLKLVKATPLIQEVMRAAESSGDSVMHDCRQWLSEHQEPSSKQR  
 >XP\_021336195.1 zinc finger FYVE domain-containing protein 26 isoform X2 [Danio rerio]  
 MHPFGREEETSRELFGFFRRCLQRGEWELAAACVSQLGEEAEDPHSPRDIVKAIVTHPYPLRWETVGSPhRLAWYWLQ  
 VLERPTEIKVSVSVKRELEFLLLLEEDIPQSVLKELHEAFLYSEEVKGKAPGDSASPLSAALLSCLRSLLTRQQPRLC  
 HSLISFLSNGDPSRDHTLQDAFIQHLTEQVKVPAKDRNREWVEQVCSVLALAPWGSDRSGAQLEPLWEGLWAAREGLMTE  
 ERILGCLLRPQSQALLMAYSSALRLLKDKLLAEAPHTQVDLPDLERVMLGLCCHKDKRLAWKAIYFECLSSGKHFLEQV  
 LLTGLDLIKREEFSKLETLLHSEFQPLSRLLLLLGWMHCQSLESATLLTVLHHRQPQSNDALSIDLACTLSCQLGVLEW  
 CTQNNPGISHDALLSHLHMLDHHSALYVLHCLTPLAKFEEHKVLELLQRTGDPSQVDSPSSSVQRNITLFRGFCAMKYAL

YAISVNARTHAHTGSLDCEPLHELQTEAAQEDETAEGCSNLFQHYLEAVPALFRLELLENIFSLLFLSDSDFT  
 QQTSTATETQPYTNTETSKPKSTKEVNTAEHFLKAENEGERMDELNQINPQLGHLTSGCRGFLVDLNVMEGILRLVREGL  
 EGVCVGVQEDGRALGADVELAESLGCSVTAETFSARLQRLSKYTAEAQWRLQIVTSNHGNGNDGLYLPSPLPSPALPLKR  
 QGSGSSGTSSRRRRKHHRHRSERHVSSERQNGEVSTSTSDGGVCVSVVCRGTETCPCGGSHSWLVPAMLSPPESLLIACI  
 RRGNYIEAQQVIAMYGLENSECAGELVFMDRYREVLIELAQVEQKIESQSLSTSSSSSEGLGTLGATPAGRTRMGSSSRL  
 TLKSIGSAAAAGMAFYISISDVADRLMSTPSRPIPCLEDSYWLSQCTIDSPDFVRPLVEELSPAAMAAFDLSCCQCQLWKT  
 SRQLETAERRLSFLEARGVRVDPKVPHANGIRGFPSVLQQISKILNKTSTNKGMSKTDNNGEENAVCSPFGCSAQEVL  
 LSCHSTLTEESITIQQNLNQRLEVTLQTLSSATNTSVDSLVGSNLLTALAEQAALKQSELDCHPVRTAMKQLLQYLDQLC  
 PLVPDGAAPDRPDYIRSFFDYVNVLASVLVRSLSGEDQSTVVKLGNPLLLLLQSPAQLLSHLLFDRQVSPDRVLSLLQQR  
 LRLSVQQVVVQRCCELTPLWDSRAVNFSQRVSGLNNGGAFCPASIASILQQYAQDCSPSLDLSPTTTSPPSSSESEVSVED  
 VSAASTSLSTSPSPSSSSPSSSFLTPSALSFLKSRSPVAALACLSASRGGVTRVTSSGWSGLPSYFRGSGRKEAVLD  
 GEQISREGEALLKNFPILRMYLRTMAEPVLGVSLADEGLGVALCGKPVVGMFLSGLQGNAQAAMAAEFQQAALNNGDLN  
 RALDLELYAQPCSQEGALRDKLLAFTALQESSAEQLFRVRDWELRGRVVLQGLDRWPLQQCLDLLHFCLSDQNTKDWPL  
 REQLQQRKQELDMYQRMRLQPSLPWETWQELREESTKNPESVFSQMLEAREFELCAQWVQLYSVSDQSGMQLQTEHLLY  
 LLEHNHTEEAQFQLEALSDSMGLEVSERALDRRPGLAACHFLSDYLT LHFQSQMTPARRRHIALHLGSKVLLTLPEASR  
 QDYFSLLSDPLLMEQMLMNLKVDWAAVAITTLRSLLLAQDAGITTQHIDTLLADYARKALDFPYAPREWSRSDSVISLQ  
 DAFLQCPAQESCPSSPSHTPPPSTGGTPMQTPSSERRPSGKKIRPLATPFTPPEKTPDRKDWIPDHKQHICMVCQRRFT  
 MFNRRHHCRRCGRLVCHSCSSKKMAVAGFDEPVRVCDQCYNFFHTDSDEELEQGEAGSPSSIDEVLNGVLSLPEVSRKQY  
 RLSPNPAENQQLKSEFYEQAPSASLCVAILTLHSDHAACGQQLIDHCRSLSRKLTNPEVDARLLTDVMRQLLFSAKLMF  
 VNAGCTQEPALCDSYISKVDVLKILVTANYKYIPSLDDIQUETAAVTRLRNQLELEYQLAVEVSTKSALDPNGVWQAWA  
 MASLKAGNLSGAREKFVRCLKAPVDRNQLNHGPRLLQEIIQHLESTVKLTLSQTMDEDILASLRELEEALSDSAPPEGTE  
 SKVQRCNFHQECLFYLFYTGTHLSLISFYLRHDCLKDALTYLQNKGCSDDVFLGIFQPCLERGRGLGALQGLENLDPTL  
 ETWGRYLLSACQLLQRRGHYHSLYQLQQFMMDHIRAAMTCIRFFSHGAQSYLQLGEQQRWLIRAKEHLRXYLQEQQSRRK  
 SHSSSFRKKMSSTDVSRHIHTIELQLEVTRFLHRCSSPSKTAVGSTYTGNSAPPTLFGNSPMKVDVACKCLTVMLGGKN  
 IEEGFIAIRVIQDFQLEALAVYIRVGQRLVRQRQYSSVRQLHKCVGESGTASKHDCDAIVLSCVSVADKSPADAKELET  
 LILECKNPENKIKAYLQCSKLRAAYLQAVKLKLVKATPLIQEVMRAAESSGDSVMHDCRQWLSEHQEPSSKQR  
 >XP\_021336194.1 zinc finger FYVE domain-containing protein 26 isoform X1 [Danio rerio]  
 MHPFGREEETSRELFGFFRRCLQRGEWELAAACVSQLGEARAEDPHSPRDIVKAIVTHPYPLRWETVGSPhRLAWYWLQ  
 VLERPTEIKVSVSVKRELEFLLLLEEDIPQSVLKELHEAFLYSEEVKGKAPGDSASPLSAALLSCLRSLLTRQQPRLC  
 HSLISFLSNGDPSRDHTLQDAFIQHLTEQVKVPAKDRNREWVEQVCSVLALAPWGSDRSGAQLEPLWEGLWAAREGLMTE  
 ERILGCLLRPQSQALLMAYSSALRLLKDKLLAEAPHTQVDLPDLERVMLGLCCHKDKRLAWKAIYFECLSSGKHFLEQV  
 LLTGLDLIKREEFSKLETLLHSEFQPLSRLLLLLGWMHCQSLESATLLTVLHHRQPQSNDALSIDLACTLSCQLGVLEW  
 CTQNNPGISHDALLSHLHMLDHHSALYVLHCLTPLAKFEEHKVLELLQRTGDPSQVDSPSSSVQRNITLFRGFCAMKYAL

YAISVNARTHAHTGSLDCEPLHELQTEAAQEDETAEGCSNLFQHYLEAVPALFRLELLENIFSLLFLSDSDFT  
 QQTSTATETQPYTNTETSKPKSTKEVNTAEHFLKAENEGERMDELNQINPQLGHLTSGCRGFLVDLNVMEGILRLVREGL  
 EGVCVGGQEDGRALGADVELAESLGCSVTAETFSARLQRLSKYTAEAQWRLQIVTSNHGNGNDGLYLPSPLPSPALPLKR  
 QGSGSSGTSSRRRRKHHRHRSERHVSSERQNGEVSTSTSDGGVCVSVVCRGTETCPCGGSHSWLVPAMLSPPESLLIACI  
 RRGNYIEAQQVIAMYGLENSECAGELVFMDRYREVLIELAQVEQKIESQSLSTSSSSSEGLGTLGATPAGRTRMGSSSRL  
 TLKSIGSAAAAGMAFYISDVADRLMSTPSRPIPCLEDSYWLSQCTIDSPDFVRPLVEELSPAAMAAFDLSCCQCQLWKT  
 SRQLETAERRLSSFLEARGVRVDPKVPHANGIRGFPSVLQQISKILNKTSTNKGMSKTDNNGEENAVCSPFGCSAQEVL  
 LSCHSTLTEESITIQQNLNQRLEVTLQTLSSATNTSVDSL VGSNLLTALAEQAALKQSELDCHPVRTAMKQLLQYLDQLC  
 PLVPDGA PD RP DY I RS FF DY V NV L AS VL V R S L G S E D Q S T V V K L G N P L L L L L Q S P A Q L L S H L L F D R Q V S P D R V L S L L Q Q E R  
 L R L S V Q Q V V V Q R C C E T L P L W D S R A V N F S Q R V S G L N G G A F C P A S I A S I L Q Q Y A Q D C S P S L D L S D P T T T S D P S S E S E V S V E D  
 V S A A S T S L S T S P P S P S S S P S S S F L L T P S A L S F L K S R S P L V A A L A C L S A S R G G V T R V T S S G W S G L P S Y F R G S G R K E A V L D  
 G E Q I S R E G E A L L K N F P I L R M Y L R T M A E P V L G V S L E A D E G L G V A L C G K P V V G M L F S G L Q G N A A Q A M A A E A F Q Q A L N N G D L N  
 R A L D L L E L Y A Q P C S Q E G A L R D K L L A F T A L Q E S S S A E Q L F R V R D W E L R G R V V L Q G L D R W P L Q Q C L D L L H F C L S D Q N T K D P L  
 R E Q L Q Q R K Q E L D M Y Q R M L R L Q P S L P W E T W Q E L R E E S T K N P E S V F S Q M L E A R E F E L C A Q W V Q L Y S V S D Q S G M Q L Q T E H L L Y  
 L L E H N H T E E A F Q L L E A L S D S M G L E V S E R A L D R R P G L A A C H F L S D Y L T L H F Q S Q M T P A R R R H I H A L H L G S K V L L T L P E A S R  
 Q D Y F S L L S D P L L M L E Q M L M N L K V D W A A V A I T T L R S L L L A Q D A G I T T Q H I D T L L A D Y A R K A L D F P Y A P R E W S R S D S V I S L Q  
 D A F L Q C P A Q E S C P S S P S H T P P P S T G G T P M Q T P S S E R R P S G K K I R P L A T P F T P P E K T P D R K D W I P D H K Q H I C M V C Q R E R F T  
 M F N R R H H C R R C G R L V C H S C S S K K M A V A G F D E P V R V C D Q C Y N F F H T D S D E E L E Q G E V A G S P S I D E V L N G V L S L P E V S R K Q  
 Y R L S P N P A E N Q Q L K S E F Y Y E Q A P S A S L C V A I L T L H S D H A A C G Q Q L I D H C R S L S R K L T N P E V D A R L L T D V M R Q L L F S A K L M  
 F V N A G C T Q E P A L C D S Y I S K V D V L K I L V T A N Y K Y I P S L D D I Q E T A A V T R L R N Q L L E L E Y Y Q L A V E V S T K S A L D P N G V W Q A W  
 A M A S L K A G N L S G A R E K F V R C L K A P V D R N Q L N H G P R L L Q E I I Q H L E S T V K L T L S Q T M D E D I L A S L R E L E E A L S D A P P E G T  
 E S K V Q R C N F H Q E C L F Y L F T Y G T H L S L I S F Y L R H D C L K D A L T Y L Q N K G C S D D V F L E G I F Q P C L E R G R L G A L Q G L L E N L D P T  
 L E T W G R Y L L S A C Q L L Q R R G H Y H S L Y Q L Q Q F M M D H I R A A M T C I R F F S H G A Q S Y L Q L G E Q Q R W L I R A K E H L R T Y L Q E Q Q S R R  
 K S H S S S F R K K M S S T D V S R H I H T I E L Q L E V T R F L H R C E S S P S K T A V G S T Y T G N S A P P T L F G N S P M K V D V A C K C L T V M L G G K  
 N I E E G F G I A Y R V I Q D F Q L E A L A V Y I R V G Q R L V R Q R Q Y S S V R Q L H K C V G E S G T A S K H D C A I V L S C V S V A D K S P A D A K E L E  
 T L I L E C K N P E N K I K A Y L Q C S K L R A A Y L Q A V K L K L V K A T P L I Q E V M R A A E S S G D S V M H D I C R Q W L S E H Q E P S S K Q R  
 >XP\_005167727.1 1-phosphatidylinositol 3-phosphate 5-kinase isoform X10 [Danio rerio]  
 M A A D D K A S S S S S V M D W S S E P P P S P T S P S H L T H F K P L T P E Q D E P P L R S A Y S S F V S L F R F N K E E G R P P S V T E K S Q S A S S S P Q  
 G P R R N W S S P S H S I H G S E T H R K H P E L L R R T S A A S E G R R K S E A P L G S H D P R T A V Q L R T A L K R L K E I M E G K S Q D S D L K Q Y W M P  
 D S Q C K E C Y D C N E K F T T F R R R H H C R L C G Q I F C S R C C N Q E I P G K F M G Y T G D L R A C T Y C R K I A L S Y A H S T D S S S I G E D L S A L S  
 D S P C S V C V L E P T E P R T P V G G R K A S R N I F L E E D L A W Q S H Q E S Q N S G L N S R L T V V Q E D I G K S P A R K R S A S V T N L S L D R S G S S  
 M V P A Y E S S V S P Q N S R A L P K T D H S E E R K I L L D S F Q L K D I W K K I C H N T T G M E F Q D H R Y W L R T Y P N C I V G K E L V N W L L R N G T  
 I S T R A Q A I A I G Q A L V D G R W L D C V T H H D Q I F R D E Y A L Y R P L Q S T E F S E T P S P D S D S V N S L E G H S E P S W F K D I K F D D S D T E Q

LADENDYVTPSSSSPSKRTSVSSFHSAVSDSDAASISLNMEQDNVNFHIKKQAKYPHVPPYPAEQKMEVLLSEDGGQHIS  
 ISDAFIKESLFNRRVEEKAKEMLFTPLGWHHSSLDQLREENGEKKAMERLLSANHSHMMALLQQLLYSESLSLSWRDIIV  
 PVVRQVVQTVRPDVRSCDDDDMDIRQFVHIKKIPGGKKFDSA VVNGFVCTKNIAHKKMNSYIKNPKILLKCSIEYLYREE  
 TKFTCIDPIVLQEREFLKNYVQRIVDVRPNLVLVEKTVSRIAQDMLLEHGIAIVINVKPQVLDRVSRMTQGDLVISMDQL  
 LTKPRLGTCHKFYLHSFQLPNSEVKTLMFFEGCPPQLGCTIKLRGASEYELARVKEIIIFMVCVAYHSQLEISFLMDEFA  
 MPPLAESSSPCLLESTTLREEDETSGERESQDNDESTLGDDNLTLPVGGDFETGFTGTIKAHSREPSTSESSHKGES  
 PRINKNASITSFSGGEEENIKTSTPLSSFSSTFPQPVTTPFLISDVKEMSQEVVKGSGEGEKNKYLESTLVHQDSTSSET  
 SLPPTLFRDPLQDDTGLFVTEHVASSDDRLKSISALFKQELKDILCISPFITFREPFLLTPAGLRCPSRDYFPEQVYL  
 SPLLNKDSKELDGRKRQLLKESSPGSGSLTNGSVSHQRAIQILPCHKLTSARIAEQVGSSQQLARMLADYRAQGGRIRQ  
 REGTQFREAPPPKAPIKADSEEDKGAGVIDMTWSTKLDCLNPINHQRCLVLFSSSSAQSNAPNPCVSPWIVTMEFYGKN  
 DLTGLVFLERYCFRPSYQCPSMYCETPMVHHIRRFVHGKGCQIVLKELDSPVPGYQHTILNYSWCRICKQVTPVPLSN  
 DSWSMSFAKYLELRFYGHQYTRRANAEP CGHSIHKDYHQYFSYNQMVASF SYIPVRLLEICLPPP KIIIRNQGPKSSSLQ  
 QDLKDFSQKVAQVYLAIDDLTSLKTDTFSKTREEKMEDMFAQKDMESELRGWIEKLQVRLQTSVIDSSQQLQAVLESV  
 VVKKQGLCETLQSWNNRLQELFQKEKGRKRLSVPPSPGRHRQPTTDESKTSALESSPRNPSPVVPNGDKEDRHLNTPSS  
 SGSSSLLQLPSPAEQPSDVITSGPSFPDQDSVSNPEDMFDGHLGNSDSQVKEKSTMKTILANLLPGNSYNPIPFPPDP  
 KHYLMYEHERVPIAVCEREPSIIAFALSCKEYKTALEELTKTTAKTGGDDTSQTISAGESRVKNSPA KPSDNSMSQLSR  
 SSV DADPLKEPESADKQKKQTGNPHIELQFSDANAKFYCRIYYAE EFHKMREEIMESTEDDFVRSLSHCVNWQARGGKSG  
 AVFYATEDDRFILKQMPRLEVQSFLDFAPHYFTYITGAVHLKRPTALAKILGVYRIGYKNSQNNTTEKKLDLLVMENLFYG  
 RKMAQVFDLKGSLRNRNVKTDQGKESCEVLLDENLLKLVDHNPLYIRSHCKAILRAAIIHSDALFLSSHLIIDYSLLVGR  
 DDSTDEL VVGIIIDYIRFTWDDKLEMVVKSTGILGGQGKMPTVVSPEL YRTRFCEAMDKYFLMVPDHW SGLGLNC  
 >XP\_005167726.1 1-phosphatidylinositol 3-phosphate 5-kinase isoform X9 [Danio rerio]  
 MAADDKASSSSVMDWSSEPPPSPTSPSHLTHFKPLTPEQDEPLRSA YSSFVSLFRFNKEEGRPPSVTEKSQSASSSPQ  
 GPRRNWSSPSHSIHGSETHRKHPPELLRRTSAASEGRRKSEAPLGSHDPRTAVQLRTALKRLKEIMEGKSQDSDLKQYWMP  
 DSQCKEYDCNEKFTTFRRRHHCR LCGQIFCSRCCNQEIPGKFMGYTGD LRACTYCRKIALSYAHSTDSSSIGEDLSALS  
 DSPCSVCVLEPTERTPTVGGGRKASRNIFLEEDLAWQRKNSIGMRKNHQESQNSGLNSRLTVVQEDIGKSPARKRSASVTN  
 LSLDRSGSSMVPAYESSVSPQNSRALPKTDHSEERKILLDSFQLKDIWKKICHNTTGMEFQDHRYWLRTYPNCIVGKEL  
 VNWLLRNGTISTRAQAIAIGQALVDGRWLDCVTHHDQIFRDEYALYRPLQSTEFSETPSPDSDSVNSLEGHSEPSWFKDI  
 KFDDSDTEQLADENDYVTPSSSSPSKRTSVSSFHSAVSDSDAASISLNMEQDNVNFHIKKQAKYPHVPPYPAEQKMEVLL  
 SEDGGQHISISDAFIKESLFNRRVEEKAKEMLFTPLGWHHSSLDQLREENGEKKAMERLLSANHSHMMALLQQLLYSESL  
 SLSWRDIIVPVVRQVVQTVRPDVRSCDDDDMDIRQFVHIKKIPGGKKFDSA VVNGFVCTKNIAHKKMNSYIKNPKILLKCS  
 IEYLYREETKFTCIDPIVLQEREFLKNYVQRIVDVRPNLVLVEKTVSRIAQDMLLEHGIAIVINVKPQVLDRVSRMTQG  
 DLVISMDQLLTKPRLGTCHKFYLHSFQLPNSEVKTLMFFEGCPPQLGCTIKLRGASEYELARVKEIIIFMVCVAYHSQLE  
 ISFLMDEFAMPPSLAESSSPCLLESTTLREEDETSGERESQDNDESTLGDDNLTLPVGGDFETGFTGTIKAHSREPSTS



ESSHKDGESPRINKNASITSFSGGEEENIKTSTPLSSFSTFPQVTPPFLISDVKEMSQEVVKGSGEGEKNKYLESTLV  
HQDSTSSETSLPPTRLFRDPLQDDTGLFVTEHVASSDDRLKSISALFKQELKDIILCISPFITFREPFLLTPAGLRCP  
DYFPEQVYLSPLLNKDSKELDGRRRKQLLKESSPGSGSLTNGSVSHQRAIQILPCHKLTSARIAEQVGSSQQLARMLADY  
RAQGGRRIRQREGTQFREAPPPKAPIKADSEEDKGAGVIDMTWSTKLDCLNPINHQRCLCVLFSSSSAQSNAPNPCVSPWI  
VTMEFYGKNDLTLGVFLERYCFRPSYQCPSMYCETPMVHHIRRFVHGKGCVQIVLKELDSPVPGYQHTILNYSWCRICKQ  
VTPVVPLSNDSSWSMSFAKYELRFGHYTRRANAEPGHSIHKDYHQYFSYNQMVASFYIPVRLLEICLPPPKIIRN  
QGPKSSLQQLKDFSQKVAQVYLAIIDRLTSLKTDTFSTREEKMEDMFAQKDMEESELRGWIEKLQVRLQTSVIDSSQ  
QLQAVLESVVVKKQGLCETLQSWNNRLQELFQQEKGRKRLSVPPSPGRHRQPTTDESKTSALESSPRNPSPVVPNGDKED  
RHLNTPSSSSGSSSLQLPSPAEQPSDVITSGPSFPDQDSVSNPEDMFDGHLGNSDSQVKEKSTMKTILANLLPGNSYN  
PIPFDPDPKHLYMYEHERVPIAVCEREPSIIAFALSCKEYKTALEELTKTTAKTGGDDTSQTISAGESRVKNSPA  
DNSMSQLSRSSVDADPLKEPESADKQKQTGNPHIELQFSDANAKFYCRIYYAEFHKMREEIMESTEDDFVRSLSHCVN  
WQARGGKSGAVFYATEDDRFILKQMPRLEVQSFLDFAPHYFTYITGAVHLKRPTALAKILGVYRIGYKNSQNNTTEKKDL  
LVMENLFYGRKMAQVFDLKGSLRNRNVKTDQGKESCEVLLDENLLKLVDNPLYIRSHCKAILRAAIHSDALFLSSHLI  
IDYSLLVGRDDSTDELVVGIIYIRTFTWDKKLEMVVKSTGILGGQGKMPTVVSPELYRTRFCEAMDKYFLMVPDHW  
SGLNLC

>XP\_005167724.1 1-phosphatidylinositol 3-phosphate 5-kinase isoform X8 [Danio rerio]

MAADDKASSSSVMDWSSEPPPSPTSPSHLTHFKPLTPEQDEPLRSAYSSFVSLFRFNKEKTGANIAPAKKLAKLEEGR  
PPSVTEKSQSASSSPQGPRRNWSSPSHSIHGSETHRKHPPELLRRTSAASEGRRKSEAPLGSHDPRTAVQLRTALKRLKEI  
MEGKSQDSDLKQYWMPDSQCCECYDCNEKFTTFRRRHHCRLCGQIFCSRCCNQEIPGKFMGYTGDLRACTYCRKIALSYA  
HSTDSSSIGEDLSALSDSPCSVCVLEPTEPRTPVGGRKASRNIFLEEDLAWQSHQESQNSGLNSRLTVVQEDIGKSPARK  
RSASVTNLSLDRSGSSMVPAYESSVSPQNSRALPKTDHSEEERKILLDSFQLKDIWKKICHNTTGMEFQDHRYWLRTPN  
CIVGKELVNWLLRNGTISTRAQAIAIGQALVDGRWLD CVTHHDQIFRDEYALYRPLQSTEFSETPSPDSDSVNSLEGHSE  
PSWFKDIKFDDSDTEQLADENDYVTPSSSSPSKRTSVSSFHSAVSDSAASISLNMEQDNVNFHIKKQAKYPHVPPYPAE  
QKMEVLLSEDGGQHISISDAFIKESLFNRRVEEKAKEMLFTPLGWHHSSLDQLREENGEKKAMERLLSANHSHMMALLQQ  
LLYSESLSLSWRDIIVPVVRQVVQTVRPDVRSCDDDDMDIRQFVHIKKIPGGKKFDSAVVNGFVCTKNIAHKKMNSYIKNP  
KILLKCSIEYLYREETKFTCIDPIVLQEREFLKNYVQRIVDVRPNLVLVEKTVSRIAQDMLLEHGIAIVINVKPQVLDR  
VSRMTQGDLVISMDQLLTKPRLGTCHKFYLSFQLPNSEVKTLMFFEGCPPQLGCTIKLRGASEYELARVKEIIFMVCV  
AYHSQLEISFLMDEFAMPPSLAESSFPCLLESTTLREEDETSGERESQDNDESTLGDDNLTLVPGDDFETGFTGTIKAH  
SREPSTSESSHKDGESPRINKNASITSFSGGEEENIKTSTPLSSFSTFPQVTPPFLISDVKEMSQEVVKGSGEGEKNK  
YLESTLVHQDSTSSETSLPPTRLFRDPLQDDTGLFVTEHVASSDDRLKSISALFKQELKDIILCISPFITFREPFLLTPA  
GLRCP  
SRDYFPEQVYLSPLLNKDSKELDGRRRKQLLKESSPGSGSLTNGSVSHQRAIQILPCHKLTSARIAEQVGSSQQL  
ARMLADYRAQGGRRIRQREGTQFREAPPPKAPIKADSEEDKGAGVIDMTWSTKLDCLNPINHQRCLCVLFSSSSAQSNAPN  
PCVSPWIVTMEFYGKNDLTLGVFLERYCFRPSYQCPSMYCETPMVHHIRRFVHGKGCVQIVLKELDSPVPGYQHTILNYS

WCRICKQVTPVPLSNDSWSMSFAKYLELRFYGHQYTRRANAEP CGHSIHKDYHQYFSYNQMVASFSYIPVRLLEICLPP  
PKIIIRNQGPSKSSLQQDLKDFSQKVAQVYLAIDDR L TSLKTD TFSKTREEK MEDMFAQKDMEESELRGWIEKLQVRLQT  
SVIDSSQQLQAVLESVVVKQGLCETLQSWNNRLQELFQQEKGRKRLSVPPSPGRHRQPTTDESKTSALESSPRNPSPVV  
PNGDKEDRHLNTFPSSSGSSSLQLPSPAEQPSDVITSGPSFPDQDSVSNPEDMFDGHL LGSNDSQVKEKSTMKTILANL  
LPGNSYNPIPFDPDKHYLMYEHERVPIAVCEREPSSIIAFALSCKEYKTALEELTKTTAKTGGDDTSQTISAGESRVK  
NSPAKPSDNSMSQLSRSSVDADPLKEPESADKQKKQTGNPHIELQFSDANAKFYCRIYYAE EFHKMREEIMESTEDDFVR  
SLSHCVNWQARGGKSGAVFYATEDDRFILKQMPRLEVQSFLDFAPHYFTYITGAVHLKRPTALAKILGVYRIGYKNSQNN  
TEKKLDLLVMENLFYGRKMAQVFDLKGSLRNRNVKTDQGKESCEVVLLDENLLKLVDHNPLYIRSHCKAILRAAIHSDAL  
FLSSHLIIDYSLLVGRDDSTDELVVGII DYIRTF TW DKKLEMVVKSTGILGGQGKMPTVVSPELYRTRFCEAMD KYFLMV  
PDHWSGLGLNC

>XP\_009303000.1 1-phosphatidylinositol 3-phosphate 5-kinase isoform X7 [Danio rerio]

MAADDKASSSSSVMDWSSEPPPSPTSPSHLTHFKPLTPEQDEPLRSA YSSFVSLFRFNKEKTGANIAPAKKLAKLEEGR  
PPSVTEKSQSASSSPQGPRRNWSSPSHSIHGSETHRKHPPELLRRTSAASA EWEEGRRKSEAPLGSHDPRTAVQLRTALKR  
LKEIMEGKSQDSDLKQYWMPDSQCKEYDCNEKFTTFRRRHHCRLCGQIFCSRCCNQEIPGKFMGYTGDLRACTYCRKIA  
LSYAHSTDSSSIGEDLSALSDSPCSVCVLEPTEPRTPVGGRKASRNIFLEEDLAWQSHQESQNSGLNSRLTVVQEDIGKS  
PARKRSASVTNLSLDRSGSSMVPA YESSVSPQNSRALPKTDHSEEERKILLDSFQLKDIWKKICHNTTGMEFQDHR YWLR  
TYPNCIVGKELVNWLLRNGTISTRAQAIAIGQALVDGRWLDCVTHHDQIFRDEYALYRPLQSTEFSETSPSDSDSVNSLE  
GHSEPSWFKDIKFDDSDTEQLADENDYVTPSSSSPSKRTSVSSFHSAVDSDSAASISLNMEQDNVNFHIKKQAKYPHVPP  
YPAEQKMEVLLSEDGGQHISISDAFIKESLFNRRVEEKAKEMLFTPLGWHHSSLDQLREENGEKKAMERLLSANHSHMMA  
LLQQLLYSESLSLSWRDIIVPVVRQVVQTVRPDVRSCDDMDIRQFVHIKKIPGGKKFDSA VVNGFVCTKNIAHKKMNSY  
IKNPKILLKCSIEYLYREETKFTCIDPIVLQEREFLKNYVQRIVDVRPNLVLVEKTVSRIAQDMLLEHGIAIVINVKPQ  
VLDRVSRMTQGD LVISMDQLLTKPRLGTCHKFYLSHFQLPNSEVKTL MFFEGCPPQLGCTIKLRGASEYELARVKEIIF  
MVCVAYHSQLEISFLMDEFAMPPSLAESSFPCLLESTTLREEDETSGERESQDNDESTLGDDNLTLVPGDDFETGFTGT  
IKAHSREPSTSESHKDGESPRINKNASITSFSGGEEENIKTSTPLSSFSSTFPQVTPPFLISDVKEMSQEVVKGSGEG  
EKNKYLESTLVHQDSTSSETSLPPTRLFRDPLQDDTGLFVTEHVASSDDRLKSISALFKQELKDIILCISPFITFREPF  
LTPAGLRCP SRDYFPEQVYLSPLL NKDSKELDGRRKRQLLKESSPGSGSLTNGSVSHQRAIQILPCHKLTSARIAEQVGS  
SQQLARMLADYRAQGGRI RQREGTQFREAPPPKAPIKADSEEDKGAGVIDMTWSTKLDCLNPINHQR LCVLFSSSSAQSN  
NAPNPCVSPWIVTMEFYGKNDLTLGVFLERYCFRPSYQCPSMYCETPMVHHIRRFVHGKGC VQIVLKELDSPVPGYQHTI  
LNYSWCRICKQVTPVPLSNDSWSMSFAKYLELRFYGHQYTRRANAEP CGHSIHKDYHQYFSYNQMVASFSYIPVRLLEI  
CLPPP KIIIRNQGPSKSSLQQDLKDFSQKVAQVYLAIDDR L TSLKTD TFSKTREEK MEDMFAQKDMEESELRGWIEKLQV  
RLQTSVIDSSQQLQAVLESVVVKQGLCETLQSWNNRLQELFQQEKGRKRLSVPPSPGRHRQPTTDESKTSALESSPRNP  
SPVVPNGDKEDRHLNTFPSSSGSSSLQLPSPAEQPSDVITSGPSFPDQDSVSNPEDMFDGHL LGSNDSQVKEKSTMKTI  
LANLLPGNSYNPIPFDPDKHYLMYEHERVPIAVCEREPSSIIAFALSCKEYKTALEELTKTTAKTGGDDTSQTISAGE

SRVKNSPAKPSDNSMSQLSRSSVDADPLKEPESADKQKKQTGNPHIELQFSDANAKFYCRIYYAEFHKMREEIMESTED  
DFVRSLSHCNVNWQARGGKSGAVFYATEDDRFILKQMPRLEVQSFLDFAPHYFTYITGAVHLKRPTALAKILGVYRIGYKN  
SQNNTEKKLDLLVMENLFYGRKMAQVFDLKGSLRNRNVKTDQGKESCEVVLLDENLLKLVDHNPLYIRSHCKAILRAAIH  
SDALFLSSHLIIDYSLLVGRDDSTDELVVGIIIDYIRTFTWDKKLEMVVKSTGILGGQGKMPTVVSPELYRTRFCEAMDKY  
FLMVPDHWWSGLGLNC

>NP\_001120777.1 1-phosphatidylinositol 3-phosphate 5-kinase [Danio rerio]

MAADDKASSSSSVMDWSSEPPPSPTSPSHLTHFKPLTPEQDEPLRSAYSSFVSLFRFNKEKTGANIAPAKKLAKLEEGR  
PPSVTEKSQSASSSPQGPRRNWSSPSHSIHGSETHRKHPPELLRRTSAASEGRRKSEAPLGSHDPRTAVQLRTALKRLKEI  
MEGKSQDSDLKQYWMPDSQCCECYDCNEKFTTFRRRHHCRLCGQIFCSRCCNQEIPGKFMGYTGDLRACTYCRKIALSYA  
HSTDSSSIGEDLSALSDSPCSVCVLEPTEPRTPVGGRKASRNIFLEEDLAWQRKNSIGMRKNHQESQNSGLNSRLTVVQE  
DIGKSPARKRSASVTNLSLDRSGSSMVPAYESVSPQNSRALPKTDHSEEERKILLDSFQLKDIWKKICHNTTGMEFQDH  
RYWLRTPNCIVGKELVNWLLRNGTISTRAQAIAIGQALVDGRWLD CVTHHDQIFRDEYALYRPLQSTEFSETPSPSDS  
VNSLEGHSEPSWFKDIKFDDSDTEQLADENDYVTPSSSSPSKRTSVSSFHSAVSDSAASISLNMEQDNVNFHIKKQAKY  
PHVPPYPAEQKMEVLLSEDGGQHISISDAFIKESLFNRRVEEKAKEMLFTPLGWHHSSLDQLREENGEKKAMERLLSANH  
SHMMALLQQLLYSESLSLSWRDIIIVPVVRQVVQTVRPDVRSCDDDDMDIRQFVHIKKIPGGKKFDSA VVNGFVCTKNIAHK  
KMNSYIKNPKILLKCSIEYL YREETKFTCIDPIVLQEREFLKNYVQRIVDVRPNLVLVEKTVSRIAQDMLLEHGIAIVI  
NVKQPVLDRVSRMTQGDLVISMDQLLTKPRLGTCHKFYLSFQLPNSVKTLMFFEGCPPQLGCTIKLRGASEYELARVK  
EIIIFMVCVAYHSQLEISFLMDEFAMPPSLAESSFPCLLESTTLREEDETSGERESQDNDESTLGDDNLTLPVPGDDFET  
GFTGTIKAHSREPSTSESSHKDGESPRINKNASITSFSGGEEENIKTSTPLSSFSSTFPQPVTTPFLISDVKEMSQEVVK  
GSGEGEKNKYLESTLVHQDSTSSETSLPPTRLFRDPLQDDTGLFVTEHVASSDDRLKSISALFKQELKDIILCISPFITF  
REPFLTPAGLRCPSRDYFPEQVYLSPLLNKDSKELDGRRKQRLKESSPGSGSLTNGSVSHQRAIQILPCHKLTSARIA  
EQVGSSQQLARMLADYRAQGGRIRQREGTQFREAPPPKAPIKADSEEDKGAGVIDMTWSTKLDCLNPINHQRCLCVLFSSS  
SAQSNNA PNPCVSPWIVTMEFYGKNDLT LGVFLERYCFRPSYQCPSMYCETPMVHHIRRFVHGKGC VQIVLKELDSPVPG  
YQHTILNYSWCRICKQVTPVVPLSNDSWSMSFAKYLELRFYGHQYTRRANAEP CGHSIHKDYHQYFSYNQMVASFYIPV  
RLLEICLPPPKIIIRNQGPSKSSLQQDLKDFSQKVAQVYLAIDDRLTSLKTDTF SKTREEKMEDMFAQKDMEESELRGWI  
EKLQVRLQTSVIDSSQQLQAVLESVVVKKQGLCETLQSWNNRLQELFQQEKGRKRLSVPPSPGRHRQPTTDESKTSALES  
SPRNPSPVVPNGDKEDRHLNTFPSSSGSSLLQLPSPAEQPSDVITSGPSFPDQDSVSNPEDMFDGHLLGSNDSQVKEKS  
TMKTILANLLPGNSYNPIPFDPDKHYLMYEHERVPIAVCEREPSSIIAFALSCKEYKTALEELTKTTAKTGGDDTSQT  
ISAGESRVKNSPAKPSDNSMSQLSRSSVDADPLKEPESADKQKKQTGNPHIELQFSDANAKFYCRIYYAEFHKMREEIM  
ESTEDDFVRSLSHCNVNWQARGGKSGAVFYATEDDRFILKQMPRLEVQSFLDFAPHYFTYITGAVHLKRPTALAKILGVYR  
IGYKNSQNNTEKKLDLLVMENLFYGRKMAQVFDLKGSLRNRNVKTDQGKESCEVVLLDENLLKLVDHNPLYIRSHCKAIL  
RAAIHSDALFLSSHLIIDYSLLVGRDDSTDELVVGIIIDYIRTFTWDKKLEMVVKSTGILGGQGKMPTVVSPELYRTRFCE  
AMDKYFLMVPDHWWSGLGLNC

>XP\_005167722.1 1-phosphatidylinositol 3-phosphate 5-kinase isoform X5 [Danio rerio]

MAADDKASSSSSVMDWSSEPPPSPTSPSHLTHFKPLTPEQDEPLRSAYSSFVSLFRFNKEKTGANIAPAKKLAKLEEGR  
PPSVTEKSQSASSSPQGPRRNWSSPSHSIHGSETHRKHPPELLRRTSAASAEWEEGRRKSEAPLGSHDPRTAVQLRTALKR  
LKEIMEGKSQSDSLKQYWMPDSQCCECYDCNEKFTTFRRRHHCLCGQIFCSRCCNQEIPGKFMGYTGDLRACTYCRKIA  
LSYAHSTDSSSIGEDLSALSDSPCSVCVLEPTEPRTTPVGGRKASRNIFLEEDLAWQRKNSIGMRKNHQESQNSGLNSRLT  
VVQEDIGKSPARKRSASVTNLSLDRSGSSMVPAYESSVSPQNSRALPKTDHSEEERKILLDSFQLKDIWKKICHNTTGME  
FQDHRYWLRTYPNCIVGKELVNWLLRNGTISTRAQAIAIGQALVDGRWLD CVTHHDQIFRDEYALYRPLQSTEFSETPSP  
DSDSVNSLEGHSEPSWFKDIKFDDSDTEQLADENDYVTPSSSSPSKRTSVSSFHSAVSDSDSAASISLNMEQDNVNFHIKK  
QAKYPHVPPYPAEQKMEVLLSEDGGQHISISDAFIKESLFNRRVEEKAKEMLFTPLGWHHSSLDQLREENGEKKAMERLL  
SANHSHMMALLQQLLYSESLSLSWRDIIVPVVRQVVQTVRPDVRSCDDMDIRQFVHIKKIPGGKKFDSA VVNGFVCTKN  
IAHKKMNSYIKNPKILLKCSIEYLYREETKFTCIDPIVLQEREFKKNYVQRIVDVRPNLVLVEKTVSRIAQDMLLEHGI  
AIVINVKPQVLDRVSRMTQGDLVISMDQLLTKPRLGTCHKFYLSHFQLPNSEVKTLMMFFEGCPPQLGCTIKLRGASEYEL  
ARVKEIIIFMVCVAYHSQLEISFLMDEFAMPPSLAESSFPCLLESTTLREEDETSGERESQDNDESTLGDDNLTLPVPGD  
DFETGFTGTIKAHSREPSTSESSHKDGESPRINKNASITSFSGGEEENIKTSTPLSSFSSTFPQPVTPPFLISDVKEMSQ  
EVVKGSGEGEKNKYLESTLVHQDSTSSETSLPPTRLFRDPLQDDTGLFVTEHVASSDDRLLKSISALFKQELKDIILCISP  
FITFREPFLLTPAGLRCPSRDYFPEQVYLSPLLNKDSKELDGRRKRQLLKESSPGSGSLTNGSVSHQRAIQILPCHKLTS  
ARIAEQVGSSQQLARMLADYRAQGGRIQREGTQFREAPPKAPIKADSEEDKGAGVIDMTWSTKLDCLNPINHQRCLCVL  
FSSSSAQSNNA NPCVSPWIVTMEFYGKNDLT LGVFLERYCFRPSYQCPSMYCETPMVHHIRRFVHGKGC VQIVLKELDS  
PVPGYQHTILNYSWCRICKQVTPVPLSND SWSMSFAKYLELRFYGHQYTRRANAEP CGHSIHKDYHQYFSYNQMVASF S  
YIPVRLLEICLPPP KIIIRNQGPSKSSLQ QDLKDFSQKVAQVYLAIDDRLTSLKTDTF SKTREEKMEDMFAQKDMEES E L  
RGWIEKLQVRLQTSVIDSSQQLQAVLESVVVKKQGLCETLQSWNNRLQELFQQEKGRKRLSVPPSPGRHRQPTTDESKTS  
ALESSPRNPSPVVPNGDKEDRHLNTFPSSSGSSSLQLPSPAEQPSDVITSGPSFPDQDSVSNPEDMFDGHL LGSND S QV  
KEKSTMKTILANLLPGNSYNPIPFDPDKHYLMYEHERVPIAVCEREPSIIAFALSCKEYKTALEELTKTTAKTGGDD  
TSQTISAGESRVKN SPAKPSDNSMSQLSRSSVDADPLKEPESADKQKKQTGNPHIELQFSDANAKFYCRIYYAE EFHKMR  
EEIMESTEDDFVRSLSHCVNWQARGGKSGAVFYATEDDRFILKQMPRLEVQSFLDFAPHYFTYITGAVHLKRPTALAKIL  
GVYRIGYKNSQNNTTEKKLDLLVMENLFYGRKMAQVFDLKGSLRNRNVKTDQGKESCEVVLLDENLLKL VHDNPLYIRSHC  
KAILRAAIHSDALFLSSHLIIDYSLLVGRDDSTDEL VVGIIIDYIRTFTWDDKKLEMVVKSTGILGGQGKMPTVVSP ELYRT  
RFCEAMDKYFLMVPDHW SGLGLNC

>XP\_009302997.1 1-phosphatidylinositol 3-phosphate 5-kinase isoform X2 [Danio rerio]

MAADDKASSSSSVMDWSSEPPPSPTSPSHLTHFKPLTPEQDEPLRSAYSSFVSLFRFNKEKTGANIAPAKKLAKLEEGR  
PPSVTEKSQSASSSPQGPRRNWSSPSHSIHGSETHRKHPPELLRRTSAASEGRRKSEAPLGSHDPRTAVQLRTALKRLKEI  
MEGKSQSDSLKQYWMPDSQCCECYDCNEKFTTFRRRHHCLCGQIFCSRCCNQEIPGKFMGYTGDLRACTYCRKIALSYA  
HSTDSSSIGEDLSALSDSPCSVCVLEPTEPRTTPVGGRKASRNIFLEEDLAWQRKNSIGMRKNHQESQNSGLNSRLTVVQE

DIGKSPARKRSASVTNLSLDRSGSSMVPAYESSVSPQNSRALPKTDHSEEERKILLDSFQLKDIWKKICHNTTGMEFQDH  
RYWLRTPNCIVGKELVNWLLRNGTISTRAQAIAIGQALVDGRWLD CVTHHDQIFRDEYALYRPLQSTEFSETPSPDSDS  
VNSLEGHSEPSWFKDIKFDDSDTEQLADENDYVTPSSSSPSKRTSVSSFHSAVSDSAASISLNMEQDNVNFHIKKQAKY  
PHVPPYPAEQKSMEPHDPFTPETDIHAPMEVLLSEDGGQHISISDAFIKESLFNRRVEEKAKEMLFTPLGWHHSSLDQLR  
EENGEKKAMERLLSANHSHMMALLQQLLYSESLSLSWRDIIVPVVRQVVQTVRPDVRSCDDDDMDIRQFVHIKKIPGGKKF  
DSAVVNGFVCTKNIAHKKMNSYIKNPKILLKCSIEYLYREETKFTCIDPIVLQEREFLKNYVQRIVDVRPNLVLVEKTV  
SRIAQDMLLEHGIAIVINVKPQVLDRVSRMTQGDLVISMDQLLTKPRLGTCHKFYLSFQLPNSEVKTLMMFFEGCPPQLG  
CTIKLRGASEYELARVKEIIIFMVCVAYHSQLEISFLMDEFAMPPSLAESSFPCLLESTTLREEDETSGERESQDNDES  
TLGDDNLTLPVGGDDFETGFTGTIKAHSREPSTSESSHKDGESPRINKNASITSFSGGEEENIKTSTPLSSFSSTFPQPV  
PPFLISDVKEMSQEVVKGSGEGEKNKYLESTLVHQDSTSSETSLPPTRLFRDPLQDDTGLFVTEHVASSDDRLLKSISALF  
KQELKDIILCISPFITFREPFLLTPAGLRCPSRDYFPEQVYLSPLLNKDSKELDGRRRKQLLKESSPGSGSLTNGSVSHQ  
RAIQILPCHKLTSARIAEQVGSSQQLARMLADYRAQGGRRIRQREGTQFREAPPPKAPIKADSEEDKGAGVIDMTWSTKLD  
CLNPINHQRCLVLFSSSSAQSNAPNPCVSPWIVTMEFYGKNDLTLGVFLERYCFRPSYQCPSMYCETPMVHHIRRFVHG  
KGCVQIVLKELDSPVPGYQHTILNYSWCRIKQVTPVVPVPLSNDWSMSFAKYLELRFYGHQYTRRANAEPGCHSIHKDYH  
QYFSYNQMVASFYIPVRLLEICLPPPKIIRNQGPSKSSLQQDLKDFSQKVAQVYLAIDRLTSLKTDTFSTREEKME  
DMFAQKDMESELRGWIEKLQVRLQTSVIDSSQQLQAVLESVVVKKQGLCETLQSWNNRLQELFQQEKGRKRLSVPPSPG  
RHRQPTTDESKTSALESSPRNPSPVVPNGDKEDRHLNTFPSSSGSSSLQLPSPAEQPSDVITSGPSFPDQDSVSNPEDM  
FDGHELLGSNDSQVKEKSTMKTILANLLPGNSYNPIFPDPDKHYLMYEHERVPIAVCEREPSIIAFALSCKEYKTALE  
ELTKTTAKTGGDDTSQTISAGESRVKNSPA KPSDNSMSQLSRSSVDADPLKEPESADKQKKQTGNPHIELQFSDANAKFY  
CRIYYAEFEHKMREEIMESTEDDFVRSLSHCVNWQARGGKSGAVFYATEDDRFILKQMPRLEVQSFLDFAPHYFTYITGA  
VHLKRPTALAKILGVYRIGYKNSQNNTTEKKDLLVMENLFYGRKMAQVFDLKGSLRNRNVKTDQGKESCEVVLLDENLLK  
LVHDNPLYIRSHCKAILRAAIIHSDALFLSSHLIIDYSLLVGRDDSTDELVVGIIIDYIRTFTWDKKLEMVVKSTGILGGQG  
KMPTVVSPELYRTRFCEAMDKYFLMVPDHW SGLGLNC

>XP\_009302999.1 1-phosphatidylinositol 3-phosphate 5-kinase isoform X4 [Danio rerio]

MAADDKASSSSVMDWSSEPPPSPTSPSHLTHFKPLTPEQDEPLRSAYSSFVSLFRFNKEEGRPPSVTEKSQSASSSPQ  
GPRRNWSSPSHSIHGSETHRKHPPELLRRTSAASAEEWEEGRRKSEAPLGSHDPRTA VQLRTALKRLKEIMEGKSQDSDLKQ  
YWMPDSQCKEYDCNEKFTTFRRRHHCRLCGQIFCSRCCNQEIPGKFMGYTGDLRACTYCRKIALSYAHSTDSSSIGEDL  
SALSDSPCSVCVLEPTEPRTPVGGRKASRNIFLEEDLAWQRKNSIGMRKNHQESQNSGLNSRLTVVQEDIGKSPARKRSA  
SVTNLSLDRSGSSMVPAYESSVSPQNSRALPKTDHSEEERKILLDSFQLKDIWKKICHNTTGMEFQDHR YWLRTPNCIV  
GKELVNWLLRNGTISTRAQAIAIGQALVDGRWLD CVTHHDQIFRDEYALYRPLQSTEFSETPSPDSDSVNSLEGHSEPSW  
FKDIKFDDSDTEQLADENDYVTPSSSSPSKRTSVSSFHSAVSDSAASISLNMEQDNVNFHIKKQAKYPHVPPYPAEQKS  
MEPHDPFTPETDIHAPMEVLLSEDGGQHISISDAFIKESLFNRRVEEKAKEMLFTPLGWHHSSLDQLREENGEKKAMERL  
LSANHSHMMALLQQLLYSESLSLSWRDIIVPVVRQVVQTVRPDVRSCDDDDMDIRQFVHIKKIPGGKKFDSAVVNGFVCTK

NIAHKKMNSYIKNPKILLKCSIEYLYREETKFTCIDPIVLQEREFLKNYVQRIVDVRPNLVLVEKTVSRIAQDMLLEHG  
 IAIVINVKPQVLDRVSRMTQGDLVISMDQLLTKPRLGTCHKFYLSHFQLPNSEVKTLMMFFEGCPPQLGCTIKLRGASEYE  
 LARVKEIIIFMVCVAYHSQLEISFLMDEFAMPPSLAESSSPCLLESTTLREEDETSGERESQDNDESTLGDDNLTLPVG  
 DDFETGFTGTIKAHSREPSTSESSHKGESPRINKNASITSFSGGEEENIKTSTPLSSFSSTFPQPVTTPPFLISDVKEMS  
 QEVVKGSGEKEKNKYLESTLVHQDSTSSETSLPPTRLFRDPLQDDTGLFVTEHVASSDDRLKSISALFKQELKDIILCIS  
 PFITFREPFLTPAGLRCPSRDYFPEQVYLSPLLNKDSKELDGRRRKQLLKESSPGSGSLTNGSVSHQRAIQILPCHKLT  
 SARIAEQVGSSQQLARMLADYRAQGGRRIRQREGTQFREAPPPKAPIKADSEEDKGAGVIDMTWSTKLDCLNPINHQRCLV  
 LFSSSSAQSNAPNPCVSPWIVTMEFYGKNDLTLGVFLERYCFRPSYQCPSMYCETPMVHHIRRFVHGKGCVCQIVLKELD  
 SPVPGYQHTILNYSWCRICKQVTPVVPLSNDSWSMSFAKYLELRFYGHQYTRRANAEPGCHSIHKDYHQYFSYNQMVASF  
 SYIPVRLLEICLPPPKIIRNQGPSKSSLQQDLKDFSQKVAQVYLAIDDRLTSLKTDTFSKTREEMEDMFAQKDMEESE  
 LRGWIEKLQVRLQTSVIDSSQQLQAVLESVVVKKQGLCETLQSWNNRLQELFQQEKGRKRLSVPPSPGRHRQPTTDESKT  
 SALESSPRNPSPVVPNGDKEDRHLNTFPSSSGSSLLQLPSPAEQPSDVITSGPSFPDQDSVSNPEDMFDGHLGSDNSQ  
 VKEKSTMKTILANLLPGNSYNPIFPDPDKHYLMYEHERVPIAVCEREPSIIAFALSCKEYKTALEELTKTTAKTGGD  
 DTSQTISAGESRVKNSPA KPSDNSMSQLSRSSVDADPLKEPESADKQKKQTGNPHIELQFSDANAKFYCRIYYAEFFHKM  
 REEIMESTEDDFVRSLSHCNVWQARGGKSGAVFYATEDDRFILKQMPRLEVQSFLDFAPHYFTYITGAVHLKRPTALAKI  
 LGVYRIGYKNSQNNTEKKLDLLVMENLFYGRKMAQVFDLKGSLRNRNVKTDQGGKESCEVLLDENLLKLVDNPLYIRSH  
 CKAILRAAIHSDALFLSSHLIIDYSLLVGRDDSTDELVVGIIIDYIRTFWDDKKLEMMVVKSTGILGGQGMPTVVSPELYR  
 TRFCEAMDKYFLMVPDHWGSLGLNC

>XP\_009302996.1 1-phosphatidylinositol 3-phosphate 5-kinase isoform X1 [Danio rerio]

MAADDKASSSSSVMDWSSEPPPSPTSPSHLTHFKPLTPEQDEPLRSAYSSFVSLFRFNKEKTGANIAPAKKLAKLEEGR  
 PPSVTEKSQSASSSPQGPRRNWSSPSHSIHGSETHRKHPPELLRRTSAASAEWEEGRRKSEAPLGSHDPRTAVQLRTALKR  
 LKEIMEGKSQDSDLKQYWMPDSQCCECYDCNEKFTTFRRRHHCRLCGQIFCSRCCNQEIPGKFMGYTGDLRACTYCRKIA  
 LSYAHSTDSSSIGEDLSALSDSPCSVCVLEPTEPRTPVGGRKASRNIFLEEDLAWQRKNSIGMRKNHQESQNSGLNSRLT  
 VVQEDIGKSPARKRSASVTNLSLDRSGSSMVPAYESSVSPQNSRALPKTDHSEEERKILLDSFQLKDIWKKICHNTTGME  
 FQDHRYLWLRTPNCIVGKELVNWLLRNGTISTRAQAIAIGQALVDGRWLDVTHHDQIFRDEYALYRPLQSTEFSETPSP  
 DSDSVNSLEGHSEPSWFKDIKFDDSDTEQLADENDYVTPSSSSPSKRTSVSSFHSAVDSDSAASISLNMEQDNVNFHIKK  
 QAKYPHPVPPYPAEQKSMEPHDPFTPETDIHAPMEVLLSEDGGQHISISDAFIKESLFNRRVEEKAKEMLFTPLGWHHSSL  
 DQLREENGEKKAMERLLSANHSHMMALLQQLLYSELSLSWRDIIVPVVRQVVQTVRPDVRSCDDDDMDIRQFVHIKKIPG  
 GKKFDSA VVNGFVCTKNIAHKKMNSYIKNPKILLKCSIEYLYREETKFTCIDPIVLQEREFLKNYVQRIVDVRPNLVLV  
 EKTVSRIAQDMLLEHGIAIVINVKPQVLDRVSRMTQGDLVISMDQLLTKPRLGTCHKFYLSHFQLPNSEVKTLMMFFEGCP  
 PQLGCTIKLRGASEYELARVKEIIIFMVCVAYHSQLEISFLMDEFAMPPSLAESSSPCLLESTTLREEDETSGERESQD  
 NDESTLGDDNLTLPVGDDFETGFTGTIKAHSREPSTSESSHKGESPRINKNASITSFSGGEEENIKTSTPLSSFSSTFP  
 QPVTTPPFLISDVKEMSQEVVKGSGEKEKNKYLESTLVHQDSTSSETSLPPTRLFRDPLQDDTGLFVTEHVASSDDRLKSI

SALFKQELKDIILCISPFITFREPFLLTPAGLRCPSRDYFPEQVYLSPLL NKDSKELDGRKRQLLKESSPGSGSLTNGS  
VSHQRAIQILPCHKLTSARIAEQVGSSQQLARMLADYRAQGGRRIRQREGTQFREAPPPKAPIKADSEEDKGAGVIDMTWS  
TKLDCLNPIHQRLCVLFSSSSAQSNAPNPCVSPWIVTMEFYGKNDLTLGVFLERYCFRPSYQCPSMYCETPMVHHIRR  
FVHGKGCVCVIVLKELDSPVPGYQHTILNYSWCRICKQVTPVPLSNDSSWSMSFAKYLELRFYGHQYTRRANAEPCHGSIH  
KDYHQYFSYNQMVASFYIPVRLLEICLPPPKIIRNQGPSKSSLQQDLKDFSQKVAQVYLAIDDRLTSLKTDTFSTRE  
EKMEDMFAQKDMEESELRGWIEKLQVRLQTSVIDSSQQLQAVLESVVVKQGLCETLQSWNNRLQELFQQEKGRKRSLVP  
PSPGRHRQPTTDESKTSALESSPRNPSPVVPNGDKEDRHLNTPSSSGSSSLQLPSPAEQPSDVITSGPSFPDQDSVSN  
PEDMFDGHLGSDNSQVKEKSTMKTILANLLPGNSYNPIPFDPDKHYLMYEHERVPIAVCEREPSIIAFALSCKEYK  
TALEELTKTTAKTGDDTSQTISAGESRVKNSPA KPSDNSMSQLSRSSVDADPLKEPESADKQKKQTGNPHIELQFSDAN  
AKFYCRIYYAEFHKMREEIMESTEDDFVRSLSHCNVNWQARGGKSGAVFYATEDDRFILKQMPRLEVQSFLDFAPHYFTY  
ITGAVHLKRPTALAKILGVYRIGYKNSQNNTEKKDLLVMENLFYGRKMAQVFDLKGSLRNRNVKTDQQGESCEVLLDE  
NLLKLVDNPLYIRSHCKAILRAAHS DALFLSSHLIIDYSLLVGRDDSTDEL VVGIIIDYIRTFTWDKKLEMVVKSTGIL  
GGQGMPTVVSPELYRTRFCEAMDKYFLMVPDHW SGLGLNC

>XP\_009302998.1 1-phosphatidylinositol 3-phosphate 5-kinase isoform X3 [Danio rerio]

MAADDKASSSSSVMDWSSEPPPSPTSPSHLTHFKPLTPEQDEPLRSAYSSFVSLFRFNKEKTGANIAPAKKLAKLEEGR  
PPSVTEKSQSASSSPQGPRRNWSSPSHSIHGSETHRKHPPELLRRTSAASAEEWEEGRRKSEAPLGSHDPRTAVQLRTALKR  
LKEIMEGKSQDSDLKQYWMPDSQCKEYDCNEKFTTFRRRHHCLCGQIFCSRCCNQEI PGKFMGYTGDLRACTYCRKIA  
LSYAHSTDSSSIGEDLSALSDSPCSVCVLEPTEPRTPVGGRKASRNIFLEEDLAWQSHQESQNSGLNSRLTVVQEDIGKS  
PARKRSASVTNLSLDRSGSSMVPAYESSVSPQNSRALPKTDHSEEEKILLDSFQLKDIWKKICHNTTGMEFQDHR YWLR  
TYPNCIVGKELVNWLLRNGTISTRAQAIAIGQALVDGRWLD CVTHHDQIFRDEYALYRPLQSTEFSETPSPDSDSVNSLE  
GHSEPSWFKDIKFDDSDTEQLADENDYVTPSSSSPSKRTSVSSFHSAVDSDSAASISLNMEQDNVNFHIKKQAKYPHVPP  
YPAEQKSMEPHDPFTPETDIHAPMEVLLSEDGGQHISISDAFIKESLFNRRVEEKAKEMLFTPLGWHHSSLDQLREENGE  
KKAMERLLSANHSHMMALLQQLLYSESLSLSWRDIIVPVVRQVVQTVRPDVRSCDDMDIRQFVHIKKIPGGKKFDSAVV  
NGFVCTKNIAHKKMNSYIKNPKILLKCSIEYLREETKFTCIDPIVLQEREFLKNYVQRIVDVRPNLVLVEKTVSRIAQ  
DMLLEHGIAIVINVKPQVLDRVSRMTQGDLVISMDQLLTKPRLGTCHKFYLSHFQLPNSEVKTLMMFFEGCPPQLGCTIKL  
RGASEYELARVKEIIFMVCVAYHSQLEISFLMDEFAMPPSLAESSSPCLLESTTLREEDETSGERESQDNDESTLGDD  
NLTLVPGDDFETGFTGTIKAHSREPSTSESHKDGESPRINKNASITSFSGGEEENIKTSTPLSSFSSTFPQPVTTPPFLI  
SDVKEMSQEVVKGSGEGEKNKYLESTLVHQDSTSSETSLPPTRLFRDPLQDDTGLFVTEHVASSDDRLKSISALFKQELK  
DIILCISPFITFREPFLLTPAGLRCPSRDYFPEQVYLSPLL NKDSKELDGRKRQLLKESSPGSGSLTNGSVSHQRAIQI  
LPCHKLTSARIAEQVGSSQQLARMLADYRAQGGRRIRQREGTQFREAPPPKAPIKADSEEDKGAGVIDMTWSTKLDCLNPI  
NHQRLCVLFSSSSAQSNAPNPCVSPWIVTMEFYGKNDLTLGVFLERYCFRPSYQCPSMYCETPMVHHIRRFVHGKGCVCV  
IVLKELDSPVPGYQHTILNYSWCRICKQVTPVPLSNDSSWSMSFAKYLELRFYGHQYTRRANAEPCHGSIHKDYHQYFSY  
NQMVASFYIPVRLLEICLPPPKIIRNQGPSKSSLQQDLKDFSQKVAQVYLAIDDRLTSLKTDTFSTREKMEKMEDMFAQ

KDMESELRGWIEKLQVRLQTSVIDSSQQLQAVLESVVVKKQGLCETLQSWNNRLQELFQQEKGRKRLSVPPSPGRHRQP  
TTDESKTSALESSPRNPSPVVPNGDKEDRHLNTPSSSSGSSSLQLPSPAEQPSDVITSGPSFPDQDSVSNPEDMFDGHL  
LGSNDSQVKEKSTMKTILANLLPGNSYNPIPFDPDKHYLMYEHERVPIAVCEREPSSIIAFALSCKEYKTALEELTKT  
TAKTGGDDTSQTISAGESRVKNSPAKPSDNSMSQLSRSSVDADPLKEPESADKQKKQTGNPHIELQFSDANAKFYCRIYY  
AEEFHKMREEIMESTEDDFVRSLSHCVNWQARGGKSGAVFYATEDDRFILKQMPRLEVQSFLDFAPHYFTYITGAVHLKR  
PTALAKILGVYRIGYKNSQNNTTEKKLDLLVMENLFYGRKMAQVFDLKGSLRNRNVKTDQGKESCEVVLLDENLLKLVDN  
PLYIRSHCKAILRAAIHSDALFLSSHLIIDYSLLVGRDDSTDELVVGIIIDYIRTFTWDKKLEMVVKSTGILGGQGKMPTV  
VSPELYRTRFCEAMDKYFLMVPDHWGSLGLNC

>NP\_001007058.2 WD repeat and FYVE domain-containing protein 1 [Danio rerio]

MAAEIHSRPQSSRPVLLNKIEGHSDGVNAAVLIPKEDGVITVSEDRTIRVWLKRDSGQYWPSIYHTVSSPCSCVSYHHES  
RRIFIGQDNGAVVEFLISEDLNKMNHVKTYPAHQNRVSDLLFSLESQWL VSTGHDKSISWMSTQSGSMLGRHSFGSWASC  
LQYDNDTQHAFVGDYSGQITLLKLDEHSCSVITTLKGHEGSVGALYWDVPVHRWLFSGASDHSVIMWDIGGRQGRITLLQG  
HHEKVQALRYLPLTRQLVSCSADGGITVWNMDTTRQEAPQWLSDSCQKCEQPFFWNIQMWDTKTLGLRQHHCRKCGK  
A

ICGKCSSKRSTYPIMGFEFQVRMCDDCFNTIKEDDRTPLATFHEGKHSHAHMDMDPNRGLMVTGSDRVVKIWDMTQVVG  
SSVAAGFSHR

>NP\_571631.2 faciogenital dysplasia [Danio rerio]

MMDSPDILHSDAQLSLSDRLSCTPAEISGLSDAVQCSKHTQESSEHTPMLQDVPPEADGETSGKIPNRDSGIDSPSCGGE  
GECFPNEEHKQEYTHEEDKREHHTHDVDKQEHTHEERKREYTHDEDKREYTHEEDSDLEEEEEEQEEEEEDQNTGIKASVCDP  
QKLLNIAKELLQTEEA YVKRLNLLDQVFCARL TEAGIPADVITGIFSNISCIHRFHQQFLPELHTRITQEWSCNPRIGD  
ILQKLAPFLKMYGEYVKNFDRSMELVSLWTQRSGTFKSTVQSIQKQEVCGNLTLQHHMLEPVQRIPRYELLLKDYLLKLP  
EGAADHRDAQNALELISTAANHSNAAIRKMEKMHKLLEVYERLGGEE DIVNPANELIKEGHIKKMSAKNGSAQDRYLYLF  
NNMVLYCVPKLRLMGQKFSVRERIDIAGMEVHENVKQNPHTFTITGKQRSLELQARTAEERDDWIKVILGTIEKHKQNS  
ETFKAFNSSFSREDEHTPDSPLGPCSNTSICETDGAQHERKSSKKREKERETCKGCSEAFNFTKRKHHCKSCGAAVCGKC  
LKVCDSRNIRMCRPCAEAEAGAAGGATEHKKRVEKQLSVSQLSSQSRSGKGEEVEQEILHR

>XP\_021332905.1 FYVE, RhoGEF and PH domain-containing protein 5-like [Danio rerio]

MPDDVRQEGQSFRSIRRASEDTSRLSHLSLKIVGIIKNPKHKQHSNISVQKKMYFNMLHNSKSLSSPNSREQTPKVHRKI  
VVEHKGSQERRTNKIVYPERRLQVDETEVEIILEQGDELGCGDELAHGVDLDAEGLEKDKPLESEDDEVSVDLHSDLYS  
KKEVDYNIVAEELQVKDMGKAAWGLTKNGKNKSSRNVLASNAVYESLAHADRLFLDKMCTGKTLIESFYPSGIVADRMF  
SSEEDIDVMFPDICDAGEALADKDGLSECDLFEQTEPLQLTETKDNINGDIMMLTIEEGLNSSDLSSVEEEYDEMOMEKE  
LMEEQINKSVAGNKA AIPSNSEESDHPSNSSSSSQTCVLSGSDTTLDEITNNNYSKNMTESEDEAISAILNLVLVQQQPE  
TQDQNSQQYQDEESNGEDKEEQVVDNLSESEGKELMVDNVYEETEPKIQAKDFLQNRKYFMSRSISVETPGKRADLLSGL  
PAGNGRLLLHPQAFYTDQCLFGDSRPALTGSLGCLSQGTRTSKVTRVDIPPPFELASITKPIRKSSPSIPNEISASCKK



PDFGFKRYLLPLRFLRKSDRKSMMDTRSISSRSSSESSPQGSCRRMDFIRHNMGSPELQRSPDCTPPVSPSSFLSHRNRR  
KEGLNFSLNNDLACSSISIEPGFLSEPLPLSKPRSFSSPNTDSSEYENVQNVASHYENVQIRLLNPVIQGGQRNQSSPSDT  
DGYVDMSSSLPGFQGKSQSSEQETDSL YTF CSPNVRADGT VGVFVG VACAQEKKT TAPDKLTVSCSRAFYS AKELL DSEAQ  
HVKTLQLLYESVNADERLMTVWTEVPDICTLHQDIHTLLETRLKEWDQNEGIAEII LAKKTEFSIFSSYISHYDDKLNLY  
EHIQSTLSDSVTLKKQLLQVIVRILQYRMLLTDYLNLSPPDSREFENTQDALVVVSDVAYHASDSLKNGADLMRLVHIEH  
SVLGLTDLIQPGRVFVKEGTLMKVS RKCKQPRHLFLMNDIMLYTYPQQDGKYRLINRLPLAGMKVSKPPMESAQSAIKIE  
VKDISITLSARQETNTSHVLYCVCSVCLMLVFVRAAPALNETAGLSQ

>XP\_697706.2 rabenosyn-5 [Danio rerio]

MASIYSPSLED SAEVKEGFLCPLCFKDLQSFYQLQDHYEEEHAGDSRHVGGQLKNLVQKAKKAKDKLLKRDGDERTDSSY  
ESFY YGGVDPYMWEPQELGATRSHLDYFKKQRAARIDHYVIEVNKCIIRLEKLTSFDRTNMDAAQIRSLEKSVVSWVNDQ  
DVPFCPCDGGKFNLNRHHHCRLCGSIMCRKCTEFVPLPMAYKLTSGTREALWAPGSGGSPVSTGQAVVQQT SRRGSISS  
ISSVTSVLEEKDEDRVRCCHHCMDALLRHQRKLEEKDHVPDIVKLYERLRTCMDKVEAKAPEYTRMAESLNAGEKTYSL  
STAALRMEIQKY YELIDVLSKKILTLGLKEELQPHPKALQLQRMVRYTATLFIQEKLGLTSLPTKEKYEELKEKRRVEQ  
EKRAQQRQVSLESHKRRL ENENRPTVSVNGDVAAPRVTKAGGWLPQSDTRSEQDDPLLQQIENIESFLRQARSANRSD  
EVCMLEENLRQLQDEFDAQQTSRAIEISQRLADETDLQQKQIQHLQQREMEHRA LAKTQERPLRGETDRTDEHSVRGDLE  
KTDHTRRGGADQAE EQPFRANKAQYQSLRANKAEDPSLRANKTQYQSLRANKAEDPTLRASKTQEHS LRGDTSKTQEHS  
PSLENKSPSKNPFDEEFPSPVEEEPTNSQTANGKKEYNPFEEENDDPNAAKNPFEDDDDDDDDRSNPFKEVSDETPASST  
NPFDEDDDDDTAIEEELLQQIDNIRAYIFDAKL SGRSDEV ELLSENKELQRTLREQKRKK

>XP\_017211441.1 FERM, RhoGEF and pleckstrin domain-containing protein 1 [Danio rerio]

MVEPEERPSVAGQRLGAPESLGISTLEPGQRPTMPPGRQISIRVQMLDDTQE VFEVSQRAPGKALFDLVCSHLNLVEGD  
YFGLEFQDQRKMIVWLDLLKPILKQIRRPKNILRFVVKFFPPDHTQLLEELTRYLFALQIKHDLACGRLTCNESSAALL  
VAHIVQSEIGDFDEVQCKQHLLNNKYIPEQDTLMDKIIGYHRKHVGQTPAESDYQLLEIARRLEMYGVRLHPAKDREGTR  
LSLAVAHSGVLVFQGH TKINAFNWSKVRKLSFKRKRFLIKLRPDLNQSNCQDTLEFMMGSRDCCKVFWKICVEYHAFRL  
FEEP KPKPKPVLFTRGSSFRFSGRTQRQVIDYVKDTEFKKVPFERKHSKIQSNSNLSPFPSRQSAEGQGEMLQRNASASG  
HQADSPLGRTQVTVENPALQRYTGSLSNSQTNGCRNGTSDEADARLKPSPSKQQA EHLSTGLASHSAKGPVSRSPQHSESP  
SAGQMMVNGQKQSLSVGQSPDGRQPSPLTSPLLYDAGFIRADDEDEVRRKRFTDKAYFIAKELLTTERTY LKDLEVITV  
SFQKAVLKDEAMPDSLRLNLI FANFEPVYKFHETFLKDVEQRLAQWEGRSNAHIKGDYQRVGDVMLKNIQGLKLLSSHLQK  
HSESLLELEQSCRSSRRLEVL CRDFELQKVCYLPLNIFFLRPLHRLHYKQILERLCKHYPPTHDDFRDSRAALADVSEL  
VLQLHTTLMKMENFQKLLELKKDLVGIDSLAAPGREFIRLGCLSKLSGKGLQQRMFFLFSDVVMYTSRGLTASNQFKVHG  
QLPLYGMTIRESEDEWGV PYSFTLFGQRQSVVVAASSASEMEKWIEDIRMAIELADKSN GPTTEILSSSFSDSKSPEDCS  
ADQESDDLSSSRSSLERQTPHRGNTTVHVCWHRSTSVMVDFSVALENQLSGNLLRKFKNSNGWQKLWVFTNFSLFFY  
KTHQDEYPLASPLLGYSITIPSESENIHKDYVFKLHFKSHVYYFRSESEYTFERWMEVIRSATC SSSVLRSSSRKDPLV  
Y

>XP\_005171779.4 myotubularin-related protein 3-like [Danio rerio]

MVEEVQQSLEAHGSSGLQVEQVPFALLGECVDHVEKTQECVLALTSYRLHIKLQENSISVPLQLIESVESHEPTQIQLT  
CKDCKVIRCNFLSVDQCQDWLRRISAASGPPARLQELFAFSFLSCSNSVTAEDREVHDGICRAGGHKQRFKRELQRMGFD  
THSAWRISNINSNYRVCSSYPEQILVPAAVTDQQLENVAAFRSWKRIPAVVYRHQSSGAVIGRCGQPEVSWWGWRNADDE  
HLVQAIKACATDPAANTALANGSCVHNHANGTISGSDPHMANGKVEAEPSATPSQKLLIMDARSYAAAVANRAKGGGCE  
CPEYYPNCEVMFMGMANIHSIRKSFQCLRTLCAQVPDPLNWLSALEGTKWLQHLSLLLKASVLVVNAVDRDHRPVLVHCS  
DGWDRTPQILALSKLMLDPFYRTIEGFEVLVETEWLDFGHKFSERCGHGERADDVNERCPVFLQWLDCVHQLQRQFPCSF  
QFNEAFLVKLVQHTYSCLFGTFLCNSVKEREEQRVQEKTCSVWSLLRPANQSFHNILYSPRSETVLRPVCHVRNLMLWSA  
VYLHNSAPSTPSDESCVPQSTPSASPIDTPVSRLPKTRSYENLSTSCENLTPNRRSSDPSVKEKWQDHLLALKINGENTH  
TSPLQHTLALNTTAAHTQKTLELSVTDSQIENTEQEVTEELNRKLELLCSTSVSQDSSLNMKNNDQIFPEDISHIDTTSA  
DGLHHKITHNPSQSSSQSSMESDSSSNHTAQKNPFHSPSQMSAAGDVSPPSGVWRCSAAFGLERDGLSVHSDAVQVRLQ  
QMETGHQLQVETLKKQVQELWSRIHANGKLSSLPDGDNNTESECLQRSGATDLTESSAEHIQQKDTEVSQWFSDQSSRCY  
GCERRFWQAARRHHCNRCGNVFCTSCCDQKVASQQLREHKHMCQVCLSHLRPSPVPPALPPADLELEKPITASSN

**Domains architecture of *Caenorhabditis elegans***

| <i>No</i> | <i>Accession Number</i> | <i>Domains</i>                                          |
|-----------|-------------------------|---------------------------------------------------------|
| 1         | NP_499183.1             | FYVE zinc finger, PH domain                             |
| 2         | NP_495565.2             | Domain of unknown function (DUF3480), FYVE zinc finger, |
| 3         | NP_001379841.1          | FYVE zinc finger                                        |
| 4         | NP_001024127.1          | FYVE zinc finger                                        |
| 5         | NP_001024128.1          | FYVE zinc finger                                        |
| 6         | NP_001022045.1          | Domain of unknown function (DUF3480), FYVE zinc finger, |

|    |                |                                                                                            |
|----|----------------|--------------------------------------------------------------------------------------------|
| 7  | NP_508756.2    | FYVE zinc finger                                                                           |
| 8  | NP_501375.2    | VHS domain, Hepatocyte growth factor-regulated tyrosine kinase substrate, FYVE zinc finger |
| 9  | NP_001368458.1 | FYVE zinc finger, RhoGEF domain                                                            |
| 10 | NP_001368457.1 | FYVE zinc finger, RhoGEF domain                                                            |
| 11 | NP_001294046.1 | FYVE zinc finger, RhoGEF domain                                                            |
| 12 | NP_001294045.1 | FYVE zinc finger, RhoGEF domain                                                            |
| 13 | NP_501455.2    | FYVE zinc finger, RhoGEF domain                                                            |
| 14 | NP_001294044.2 | FYVE zinc finger, RhoGEF domain                                                            |

|    |                |                                                                                            |
|----|----------------|--------------------------------------------------------------------------------------------|
| 15 | NP_510155.3    | Phosphatidylinositol-4-phosphate 5-Kinase, TCP-1/cpn60 chaperonin family, FYVE zinc finger |
| 16 | NP_001382742.1 | Phosphatidylinositol-4-phosphate 5-Kinase, TCP-1/cpn60 chaperonin family, FYVE zinc finger |
| 17 | NP_001255656.1 | Beige/BEACH domain, FYVE zinc finger, PH domain associated with Beige/BEACH                |
| 18 | NP_001255659.1 | Beige/BEACH domain, FYVE zinc finger, PH domain associated with Beige/BEACH                |
| 19 | NP_001255657.1 | Beige/BEACH domain, FYVE zinc finger, PH domain associated with Beige/BEACH                |
| 20 | NP_001255658.1 | Beige/BEACH domain, FYVE zinc finger, PH domain associated with Beige/BEACH                |
| 21 | NP_001252086.1 | Ankyrin repeats (3 copies), FYVE zinc finger                                               |
| 22 | NP_001252087.1 | Ankyrin repeats (3 copies), FYVE zinc finger                                               |

|    |                |                                                              |
|----|----------------|--------------------------------------------------------------|
| 23 | NP_001252085.1 | Ankyrin repeats (3 copies), FYVE zinc finger, BTB/POZ domain |
| 24 | NP_001022794.2 | Myotubularin-like phosphatase domain, FYVE zinc finger       |
| 25 | NP_497766.3    | Myotubularin-like phosphatase domain, FYVE zinc finger       |
| 26 | NP_501352.1    | FYVE zinc finger, Rabenosyn Rab binding domain               |
| 27 | NP_001294172.1 | FYVE zinc finger, Rabenosyn Rab binding domain               |
| 28 | NP_495983.1    | WD domain, G-beta repeat, FYVE zinc finger                   |

### **Retrieved sequences of *Caenorhabditis elegans***

>NP\_499183.1 Uncharacterized protein CELE\_ZK632.12 [Caenorhabditis elegans]  
MVDRLVNSEVNSRRMANVEQCFGKMGEQLSVFGRVLVGEGVLVKMCRKKPKQRQFFLFNDILVYGNIVISKKRYNKQRIL  
RLEGVQVEDLEDDGIEKHGWIKTPAKSFAVYAATETEKREWMLHIERCVTDLLERGNKQAATAHAAVWVPDGEAVKCMV  
CGKTQFNLVQRRHHCRNCGRVVCACSSRTFRIDNVHKKPVRVCDHCFDSLSSATPGQEESEPKTGNRLHHEDSSSDSED  
EVNGSGRSSNESRPTFYREDVQQPAT  
>NP\_495565.2 FYVE-type domain-containing protein [Caenorhabditis elegans]

MEEVPDMDDLLDEMESDLVKKCCSVQSKPLLPTSIGMQPRGIKHNPAVRTVTVSKFVISEDMEQMEGNINIDTSQLP  
 NTFQTKSSFPPNSDERNIGKENEVSARQEIAHKLKSVHNYSDATNFDPSKKVITQKFSQESEPESEPEPEEVEEVEED  
 TLVPETQIISNLNATARDTEPTATISKPNLDLDTMEDMLAYLNDESVDKSSLKDKPAREEGGRDSIEESANESALYQFA  
 DRFSELVISEALNHRKMHYDPAVKEFYEANDSVDPVDFAMSLDSTHSSLNSFNADNHNYLSEPENSSKKERMQSVAEENEA  
 SEPTQSSSETEKNLQNEKIDVEFIENSEAIVQNESEDVPESNSTSGTVLENIEDHLESDVVIENGSESSFVNEKMNEAS  
 TAHLVAEQSVVDDSEIHLETEDQETLSPETADSSSTNKNNSDEFPDEGSQSEASVNNEEVLENVEHVEDECTVVDAVNENTD  
 SSIEENDEENTENRPRFDSSIAIHVLHESDSDESATPRRERRLTESELQLGKTSPYWIPDSECPNCMLCNTRFTIITRR  
 HHCRAACGRVLCGSCCNEKAFLEYLQEEGKKLQAVRVCKPCSAAMLARIETHEQDEQRRRESIASENGLSGDETISSIPAAS  
 TSIPRGVLKTKPTVHVNEEDGASTSSQAHSTSGNVSDSSRRSVMFRDGVVRGAPADEGNPEEERSTALKPKKKSRKRTSV  
 VRRIAELRMEDELACALPKEGITKLLIVKPDCEHPKFEDASTVLETLCNFSVVTVVLKKNLNCNCTVQIFNNPNFGLVWAVS  
 TQGFAQIGLDELDFSWTLNDQEKQKVDAEPELDEKSALVVLPLVLRISLIYTQSTEHEYAGVRKVENRLMRVHVSVD  
 PTYPLTKHIMFFRPTVQVGLKNMRIPTNPFLIACFLHDELNWATALPNRLLYKLGEKFNVPFPTPFVNSIGRESTYSTDV  
 SGTVLKVFDFRSWSYRMRHISGCTVSLTNDKTVIRIPKSAIKELKDVLFNSRSMVAWSCDLHCEDDSVLVCEETDPGLY  
 STQVFAKNIGQRESTSASFVILDGGSKVSSLQVNVVEDGVAVRLQSERLETILNAINDGNDAVESSKDMEFRVEFVEDGN  
 WICTDSDYYPKSQIDGLYLINKFYGLSLERALTQVLQVQGINDYGIRMSHVYNLGDGRLQPEEPPKIYGMIEIAARECV  
 AMLEPHIQHLICAGIGSVSIRLFVSPYEFYDVSKWLGLEAENDKYKQSLDQLIPMLYNMVEYVPNGFEVEFVLSIVSTR  
 ALPI

>NP\_001379841.1 FYVE-type domain-containing protein [Caenorhabditis elegans]

MEEVPDMDDLLDEMESDLVKKCCSVQSKPLLPTSIGMQPRGIKHNPAVRTVTVSKFVISEDMEQMEGNINIDTSQLP  
 NTFQTKSSFPPNSDERNIGKENEVSARQEIAHKLKSVHNYSDATNFDPSKKVITQKFSQESEPESEPEPEEVEEVEED  
 TLVPETQIISNLNATARDTEPTATISKPNLDLDTMEDMLAYLNDESVDKSSLKDKPAREEGGRDSIEESANESALYQFA  
 DRFSELVISEALNHRKMHYDPAVKEFYEANDSVDPVDFAMSLDSTHSSLNSFNADNHNYLSEPENSSKKERMQSVAEENEA  
 SEPTQSSSETEKNLQNEKIDVEFIENSEAIVQNESEDVPESNSTSGTVLENIEDHLESDVVIENGSESSFVNEKMNEAS  
 TAHLVAEQSVVDDSEIHLETEDQETLSPETADSSSTNKNNSDEFPDEGSQSEASVNNEEVLENVEHVEDECTVVDAVNENTD  
 SSIEENDEENTENRPRFDSSIAIHVLHESDSDESATPRRERRLTESELQLGKTSPYWIPDSECPNCMLCNTRFTIITRR  
 HHCRAACGRVLCGSCCNEKAFLEYLQEEGKKLQAVRLLPPQFLAVY

>NP\_001024127.1 FYVE-type domain-containing protein [Caenorhabditis elegans]

MLRRLKEQVSQVANDIDGRLNNSRPSISSQGSQSQSQKSENDQEIEGFLCPMCMVELGGPDELTVHFEKEHSDFQTSANR  
 NHPDYTPPQQAPLAFATKDQEIEELRIRVNEEKRFARIKEELDNIKSVMIAIASEVTEDEIPYMAQQIQVLTADKGMVTR  
 QFLELEKESGQQSRELQQVKQERGDLMALQKMSVTMREITDESESGKVEMEDLKRELKVVKSDVVRYEIEVSRLEKMLD  
 QRPSEDDVNVLRTTELVNAQKLMDAISQEKDIEIKEHLNSIRNLSMEREKQHIVNENLEKKIGEGETVKQLQISYDAQSE  
 ELKQRNERVVQLEARIEENVFELSENKQNVKRLEDKVQESQDALQMLSNINGSNEEQMISLNSKFERNTAERKRIEAVFE  
 EKVTVQGERLKTLEMANLDLTNELASMGSLDKERSLLEKNKEISERDSSINDLKEKLAESEKKATKYKNELKEHADLV

ENLTLQLNKLQENSKDLMEKISAGEGGAKMAIEQLEQEKVKLTNELQTSSEKTKKASGELEAKISELEKKLRDAEASRTD  
 KEQKWQEKESFERKLAEAEDEIKRKGERFVEMEKEMEEERQKATDRTLKLKDALVNSEKNLETIKKESEDREKIVREKD  
 AHLEENKKRIEDAVQKLEEA EK RARELEASVSSRD TTVSTKESELSELKGKLTESNSFIEELKVQVEKVSNEISEKQQEV  
 ENLMAEMRDKEAHWKTKRDEFEAQMLRNQEDNEEASSTLKS VQEQLMKEKETS GEEKNQLISVKSQLEELKTEVERLIRS  
 EEEKTQEIEKLKSAVTATTQERDEL TATSESLRTECENLNSKIQSIEESRRHAEEKGSENLERMITEKSRLEKDIEERES  
 TIQSIQEALET KDNEIESL KTTQRVVEDEL VSKISHIESFNSRIEEFEKEMASGKRTIERLEAEKAEETEKLVVFTGTQS  
 QKQEELEKLQKEIQEKETTIARMTSSKTQFEAMFADVQQTL SKEINDKTEEIERLMERIDSLEKVNHSRIEELESRLTQR  
 ERVVESLEADLA A VRNIEQEKLD ELQKLKEEFDELKKAETMWQAEKDMLIERCLGSESDIEYEKERSQENKRRFDDALSA  
 MHELGRANQSLQIDADRYSSRKWLDDAEAINCTECGKVFSLTVRKHHCRVCGKIYCNPCSSKSVRIASAKNPVRACNTCF  
 TDSQK

>NP\_001024128.1 FYVE-type domain-containing protein [Caenorhabditis elegans]

MLRRLEKEQVSQVANDIDGRLNNSRPSISSQGSQSQSQKSENDQEIEGFLCPMCMVELGGPDELTVHFEKEHS DTSANRNH  
 PDYTPPQQAPLAFATKDQEIEELRIRVNEEKRF AERIKEELDNIKSVMIAASEVTEDEIPYMAQQIQVLTADKGMVTRQF  
 LELEKESGQQSRELQQVKQERGDLM AKLKQMSVTMREITDESESGKVEMEDLKRELKVVKSDVVRYEIEVSRLEKMLDQR  
 PSEDDVNVLRTEL VNAQKLMDAISQEKDIEIKEHLNSIRNLSMEREKQHIVNENLEKKIGEGEETVKQLQISYDAQSEEL  
 KQRNERVVQLEARIEENVFELSENKQNVKRLEDKVQESQDALQMLS NINGSNEEQMISLNSKFERNTAERKRIEAVFEEK  
 VTVQGERLKTLEMANLDLTNELASMGSLDKERSLLEEKNKEISERDSSINDLKEKLAESEKKATKYKNELKEHADLVEN  
 LTLQLNKLQENSKDLMEKISAGEGGAKMAIEQLEQEKVKLTNELQTSSEKTKKASGELEAKISELEKKLRDAEASRTDKE  
 QKWKQEKESFERKLAEAEDEIKRKGERFVEMEKEMEEERQKATDRTLKLKDALVNSEKNLETIKKESEDREKIVREKDAH  
 LEENKKRIEDAVQKLEEA EK RARELEASVSSRD TTVSTKESELSELKGKLTESNSFIEELKVQVEKVSNEISEKQQEVEN  
 LMAEMRDKEAHWKTKRDEFEAQMLRNQEDNEEASSTLKS VQEQLMKEKETS GEEKNQLISVKSQLEELKTEVERLIRSEE  
 EKTQEIEKLKSAVTATTQERDEL TATSESLRTECENLNSKIQSIEESRRHAEEKGSENLERMITEKSRLEKDIEERESTI  
 QSIQEALET KDNEIESL KTTQRVVEDEL VSKISHIESFNSRIEEFEKEMASGKRTIERLEAEKAEETEKLVVFTGTQSQK  
 QEELEKLQKEIQEKETTIARMTSSKTQFEAMFADVQQTL SKEINDKTEEIERLMERIDSLEKVNHSRIEELESRLTQRER  
 VVESLEADLA A VRNIEQEKLD ELQKLKEEFDELKKAETMWQAEKDMLIERCLGSESDIEYEKERSQENKRRFDDALSAMH  
 ELGRANQSLQIDADRYSSRKWLDDAEAINCTECGKVFSLTVRKHHCRVCGKIYCNPCSSKSVRIASAKNPVRACNTCFTD  
 SQK

>NP\_001022045.1 FYVE-type domain-containing protein [Caenorhabditis elegans]

MEEVPMDDLLDEMESDLVKKCCSVQSKPLLPPTSIGMQPRGIKHNPA PRTVVTVSKFVISED MNEQMEGNINIDTSQLP  
 NTFQTKSSFPNSDERNIGKENEVSARQEIAHKLKSVHNYSDATNFDPSKKVITQKFSQESEPESEPEPEPEEVSEVEED  
 TLVPETQIISNLNATARDTEPTATISKPNLDLDTMEDMLAYLNDESVDKSSLKDKPAREEGGRDSIEESANESALYQFA  
 DRFSELVISEALNHRKMHYDPAVKEFYEANDSVDPVFAMSLDSTHSSLNSFNADNHNYLSEPENS SKKERMQSVAEENEA  
 SEEPTQSSSETEKNLQNEKIDVEFIENSEAIVQNESEDVPESNSTSGTVLENIEDHLESDVVIENGSESSFVNEKMNEAS



TAHLVAEQSVVDDSEIHLETEDQETLSPETADSSSTNKNNSDEFPDEGSQSEASVNNEEVLENVEHVEDECTVVDAVNENTD  
SSIEENDEENTENRPRFDSSIAIHVLHESDSDESATPRRERRLTESELQLGKTSPYWIPDSECPNCMLFTIITRRHHCR  
ACGRVLCGCCNEKAFLEYLQEEGKKLQAVRVCKPCSAMLARIETHEQDEQRRRESIASENGLSGDETISSIPAASTSIP  
RGVLKTKPTVHVNEEDGASTSSQAHSTSGNVSDSSRRSVMFRDGVPRGAPADEGNPEEERSTALKPKKKSRKRTSVVRRI  
AELRMEDELACALPKEGITKLLIVKPDCEHPKFEDASTVLETLCNFSVVTVVLKKNLNCVQIFNNPNFGLVWAVSTQGF  
AQIGLDELMFSWTLNDQEKQKQVDAEEPDELDEKSALVVLPLPVLHRISLIYTQSTEHEYAGVRKVENRLMRVHVSVDPTYP  
LTKHIMFFRPTVQVGLKNMRIPTNPFLIACFLHDELNWATALPNRLLYKLGEKFNVFPTPFVNSIGRESTYSTDVSGTV  
LKVFTDFRSWSYMRHISGCTVSLTNDKTVIRIPKSAIKELKDVLNFSRSMVAWSCDLHCEDDSVLVCEETDPGLYSTQV  
FAKNIGQRESTSASFVILDGGSKVSSLQVNVVEDGVAVRLQSERLETILNAINDGNDAVESSKDMEFRVEFVEDGNWICT  
DSDYYPKSQIDGLYLINFQYGLSLERALTQVLQVQGINDYGIRMSHVYNLGDGRLQPEEHPKIYGMIEIAARECVAMLE  
PHIQHLICAGIGSVSIRLFVSPYEFYDVSKWLGLEAENDKYKQSLDQLIPMLYNMVEYVPNGFEVEFVLSIVSTRALPI

>NP\_508756.2 Lateral signaling target protein 2 [Caenorhabditis elegans]

MQSFRKIWNKPRPDDWMPLARFYADSAALNDIASELDSFDGRRDPDRCNALVTRLRVAQDRVLHIITEMLIHLYPREQDR  
ACRDFRVKFPDEILHDTLPGQLWFGAECLSAAGSNIIDHETESDLIRPLAKDVTQKQLDFLRDLLKNQSLRDPSAYNPVIKE  
NLLKFDKLFAEFYQYVSAMVPVKSVEKHSQDLVAVLFSEVLSLALVKDLITQDLIDYCDPSVMIAIPRLGIVWGLLVY  
SNGALNVDVPAENLSEMFRPFYSLLVKIRNLLRILTPTELTKLETVLCKGESAVPEDTSSTLTMSDFRTNATDEEKAKNN  
QRVWMCMDMPSDSTSSLDSSVQDSSSETTSLASSALASPHSGSEENVSQIENEEGDDEAIGTNSNSSNEVTESPETIEEPD  
NVDMEESSESEVDTHIDETRNESSDDEITDDVQASDVLQVETKKCKSSRLLEQKKFKDKSVKTIIPMQTDPQRSQIDPKNLRS  
RFRSSEDLVHRLFVCIAGVADQLQTNYSSEIRKVLKLILQPSEIIPVYEVVNAQVANSQTEGEETGVEAQETLPLPAFMG  
VRWVPDEDECEQCTACSMFPNFVRRRHHCRCNCGRIFCHKCSCNTISIPHEGYDRKVRVCNLCYVHRLNSFGCNEPMSQVNE  
NGATVPSVTEQQSAQTASASS

>NP\_501375.2 Hepatocyte growth factor-regulated tyrosine kinase substrate [Caenorhabditis elegans]

MATKFQRVLDQATDSTLVEPNWEGIILCTDMIRSGEVPKPSLQAIKRMQHENPHVVNHTLLVLDACVKNCGHKVHAEV  
ATREFMEDFKNLVTENKYDEVKNKSLEMLQCWATAFANKPEYKMOVVDTHNLMKLAGDFPSLKEADAMFMAQVAPEWA  
DG

PECYRCRSVFSVFTRKHHCRACGQIFCDKCSSRELALPQFGIEKEVRVCETCYEKKVAEVKERYPAVKKQLDAAHGRKGD  
SEADKAAKEKLLREKEEEDLALAIASQSEAEAKEKEKQNNLYSMYNGIKPEVDGYKGAAEPVTAPPPDDSSSDPLARYL  
NRDYWQKKEGKVEDWSSRSALSATAPPPSEPSIAPSICSTLMGPDDNSLNADIAAMSLGGTNGLNGLTVSDDAKLQADD  
TMKWCQSIREQVSVMNIRSNLARGRPVFNDSAIQDLFTKLTELHSHVLSRMHTLDEQRGYYESLQDHLANIGEARQAI  
DEMREEHERKRQERMAEEQRLRQAQMQQTLEMMRMKKHAMLMEQREQALQRFQQQQQEMAMRRHQQAYYNPQQM  
GYGAP

PPSGPQQPPQSYGYQQGPQSQAPPPSSQYQQSHASTQQQQQQYYQHYQANQTVTQPVQQAQQQYQQQYQGYQQQQP  
Y

QQQAGYQNPQQHQNYQNGTTNENGQYQQQQSSEVKQEHQNHGYQQQQAQHPPASVASNGHNGYGNVDQNAHHHQQQQ  
PQI

AEQPLISFD

>NP\_001368458.1 Uncharacterized protein CELE\_C28C12.10 [Caenorhabditis elegans]

MGFVPRMQNGGTGTPSERPISQVSTLSQVSDEFDEGDTASDEESMNSEKHLRRHRHEDDFDELPLPKNERKTTTVAATH  
SEIMNEMEHLFVRGGKKNNGVHKQQRQSNIDEIPSDVGKLRDNRKGRHNSLFVSPTSGMSSSSTDDFSRITSMTSDRSS  
ILTSHSGGEDSTDGASVPDYETGDEKDDQRLKKLHYAAVEFLKVQNNYVQYLKEMAVLYPEYMERFGKRVGRDLLASHN  
GHENVVLQIKKIMVQILPIHEMLLKEIDKVCSNWDSRYPNMSKTIGTFADFLKCCQPFLDNKADFLNKLLQLRNEDKEFD  
EATYMFETEVFKRGKKGAVIQQLDQVHQNFMYKLLMLRYSEYLIDDCDEKEKAQEAIQKLENTQAVNQKMGLPTTEEL  
TKLYYRFQCQFNVLEPGRVLRQSEVMKQTRKELQPRYLVLFDTYLVICRVSSSGQFDINRSYRIPLEYMKFERMEEDER  
IRCLQIRSRVKSALIIFSSEKERNQWTDDLTKAQYDRKSYKRRQSTAVQRHDENKKKMKNKLLMLTPEVPDASDLERPQLI  
DSRSRSMSCESQDELSSVPVTPLDNGEIDETLGFGVTRNGSGKKPPSEMIKPVWLPDNISNECLMEGCSTEFNIINRRH  
HCRDCGWLICKFCKGQAPLSKYDFTKQNVCSCECFDRHYKAYKDGVLFPKSNMIVQSDETILVKIGKRNDKEIVDPRKLFK  
APVNYGFRHRNVEEKRAQSIVFGRVYLSRKTETVRHALLRRDDLKLVFYKAELDSKSVLELLIYGIFYRETPLDDGWLF  
ELVHRNQIRTDDTKDDVISFRVDNSASAKKWSAAFADKLELDPTRG

>NP\_001368457.1 Uncharacterized protein CELE\_C28C12.10 [Caenorhabditis elegans]

MGFVPRMQNGGTGTPSERPISQVSTLSQVSDEFDEGDTASDEESMNSEKHLRRHRHEDDFDELPLPKNERKTTTVAATH  
SEIMNEMEHLFVRGGKKNNGVHKQQRQSNIDEIPSDVGKLRDNRKGRHNSLFVSPTSGMSSSSTDDFSRITSMTSDRSS  
ILTSHSGGEDSTDGASVPDYETGDEKDDQRLKKLHYAAVEFLKVQNNYVQYLKEMAVLYPEYMERFGKRVGRDLLASHN  
GHENVVLQIKKIMVQILPIHEMLLKEIDKVCSNWDSRYPNMSKTIGTFADFLKCCQPFLDNKADFLNKLLQLRNEDKEFD  
EATYMFETEVFKRGKKGAVIQQLDQVHQNFMYKLLMLRYSEYLIDDCDEKEKAQEAIQKLENTQAVNQKMGLPTTEEL  
TKLYYRFQCQFNVLEPGRVLRQSEVMKQTRKELQPRYLVLFDTYLVICRVSSSGQFDINRSYRIPLEYMKFERMEEDER  
IRCLQIRSRVKSALIIFSSEKERNQWTDDLTKAQYDRKSYKRRQSTAVQRHDENKKKMKNKLLMLTPEVPDASDLERPQLI  
DSRSRSMSCESQDELSSVPVTPLDNGEIDETLGFGVTRNGSGKKPPSEMIKPVWLPDNISNECLMEGCSTEFNIINRRH  
HCRDCGWLICKFCKGQAPLSKYDFTKQNVCSCECFDRHYKAYKDGVLFPKSNMIVQSDETILVKIGKRNDKEIVDPRKLFK  
APVNYGFRHRNVEEKRAQSIVFGRVYLSFRSRTETVRHALLRRDDLKLVFYKAELDSKSVLELLIYGIFYRETPLDDGW  
LFELVHRNQIRTDDTKDDVISFRVDNSASAKKWSAAFADKLELDPTRG

>NP\_001294046.1 Uncharacterized protein CELE\_C28C12.10 [Caenorhabditis elegans]

MNFELPSSSTSDVSSQNSPKCDPHPSCTTPTILVSPATSEYSNGVFFGANETNGSGVKDRARQLVNMGFVPRMQNGGTGT  
PSEIPISQVSTLSQVSDEFDEGDTASDEESMNSEKHLRRHRHEDDFDELPLPKNERKTTTVAATHSEIMNEMEHLFVRG  
GKKNNGVHKQQRQSNIDEIPSDVGKLRDNRKGRHNSLFVSPTSGMSSSSTDDFSRITSMTSDRSSILTSHSGGEDSTDG  
ASVPDYETGDEKDDQRLKKLHYAAVEFLKVQNNYVQYLKEMAVLYPEYMERFGKRVGRDLLASHNGHENVVLQIKKIM  
V

QILPIHEMLLKEIDKVCSNWDSRYPNMSKTIGTFADFLKCCQPFLDNKADFLNKLQLRNEDKEFDEATYMFETEVFKRG  
KKGAVIQQLDQVHQNFMYKLLMLRYSEYLIDDCDEKEKAQEAIQKLENTQAVNQKMGLPTTEELTKLYYRFQCQFNVL  
EPGRVLIRQSEVMKQTRKELQPRYLVLFTDYLWICRVSSSGQFDINRSYRIPLEYMKFERMEEDERIRCLQIRSRVKSAL  
IIFSSEKERNQWTDDLTKAQYDRKSYKRRQSTAVQRHDENKKKMNKLMLTPEVPDASDLERPQLIDSRSRMSMSCESQDE  
LSSVPVTPLDNGEIDETLGFGEVTRNGSGKKPPSEMIKPVWLPDNISNECLMEGCSTEFNIINRRHHCRDCGWLICKFCK  
GQAPLSKYDFTKQNVCSCECFDRHYKAYKDGVLFPSKNMIVQSDETILVKIGKRNDKEIVDPRKLFKAPVNYGFRHRNVEE  
KRAQSIVFGRVYLSFRSRKTETVRHALLRRDDLKL VFYKAELDSKSVLELLIYGIFYRETPLDDGWL FELVHRNQIRTDD  
TKDDVISFRVDNSASAKKWSAAFADKLELDPTRG

>NP\_001294045.1 Uncharacterized protein CELE\_C28C12.10 [Caenorhabditis elegans]

MNFELPSSSTSDVSSQNSPKCDPHPSCTTPTILVSPATSEYSNGVFFGANETNGSGVKDRARQLVNMGFVPRMQNGGTGT  
PSERPISQVSTLSQVSDEFDEGDTASDEESMNSEKHLRRHRHEDDFDELPLPKNERKTTTVAATHSEIMNEMEHLFVRG  
GKKNNGVHKKQRRQSNIDEIPSDVGKLRDNRKGRHNSLFVSPTSGMSSSSTDDFSRITSMTSDRSSILTSHSGGEDSTDG  
ASVVPDYETGDEKDDQRLKKLHYAAVEFLKVQNNYVQYLKEMAVLYPEYMERFGKRVGRDLLASHNGHENVVLQIKKIM  
V

QILPIHEMLLKEIDKVCSNWDSRYPNMSKTIGTFADFLKCCQPFLDNKADFLNKLQLRNEDKEFDEATYMFETEVFKRG  
KKGAVIQQLDQVHQNFMYKLLMLRYSEYLIDDCDEKEKAQEAIQKLENTQAVNQKMGLPTTEELTKLYYRFQCQFNVL  
EPGRVLIRQSEVMKQTRKELQPRYLVLFTDYLWICRVSSSGQFDINRSYRIPLEYMKFERMEEDERIRCLQIRSRVKSAL  
IIFSSEKERNQWTDDLTKAQYDRKSYKRRQSTAVQRHDENKKKMNKLMLTPEVPDASDLERPQLIDSRSRMSMSCESQDE  
LSSVPVTPLDNGEIDETLGFGEVTRNGSGKKPPSEMIKPVWLPDNISNECLMEGCSTEFNIINRRHHCRDCGWLICKFCK  
GQAPLSKYDFTKQNVCSCECFDRHYKAYKDGVLFPSKNMIVQSDETILVKIGKRNDKEIVDPRKLFKAPVNYGFRHRNVEE  
KRAQSIVFGRVYLSRKTETVRHALLRRDDLKL VFYKAELDSKSVLELLIYGIFYRETPLDDGWL FELVHRNQIRTD  
DDVISFRVDNSASAKKWSAAFADKLELDPTRG

>NP\_501455.2 Uncharacterized protein CELE\_C28C12.10 [Caenorhabditis elegans]

MKYDMNHRKNSDDTPPASRTVKEMMAEFQNKLLDDGDNFRKQPPPPSPRRAPPPPPHRKPASLSPPPDDENTIRPPSSS  
ESSENIPEEPQELITPNTTRSLGPKPTVAPKPLFLNGLLPSSSTSDVSSQNSPKCDPHPSCTTPTILVSPATSEYSNGV  
FFGANETNGSGVKDRARQLVNMGFVPRMQNGGTGTPSERPISQVSTLSQVSDEFDEGDTASDEESMNSEKHLRRHRHED  
DFDELPLPKNERKTTTVAATHSEIMNEMEHLFVRGGKKNNGVHKKQRRQSNIDEIPSDVGKLRDNRKGRHNSLFVSPTSG  
MSSSSTDDFSRITSMTSDRSSILTSHSGGEDSTDGASVVPDYETGDEKDDQRLKKLHYAAVEFLKVQNNYVQYLKEMAVL  
YPEYMERFGKRVGRDLLASHNGHENVVLQIKKIMVQILPIHEMLLKEIDKVCSNWDSRYPNMSKTIGTFADFLKCCQPFL  
DNKADFLNKLQLRNEDKEFDEATYMFETEVFKRGKKGAVIQQLDQVHQNFMYKLLMLRYSEYLIDDCDEKEKAQEAIQ  
KLENTQAVNQKMGLPTTEELTKLYYRFQCQFNVL EPGRVLIRQSEVMKQTRKELQPRYLVLFTDYLWICRVSSSGQFDI  
NRSYRIPLEYMKFERMEEDERIRCLQIRSRVKSALIIFSSEKERNQWTDDLTKAQYDRKSYKRRQSTAVQRHDENKKKMN  
KLLMLTPEVPDASDLERPQLIDSRSRMSMSCESQDELSSVPVTPLDNGEIDETLGFGEVTRNGSGKKPPSEMIKPVWLPDN

ISNECLMEGCSTEFNIINRRHHCRDCGWLICKFCKGQAPLSKYDFTKQNVCECFDRHYKAYKDGVLFP SKNMIVQSDET  
ILVKIGKRNDKEIVDPKLFKAPVNYGFRHRNVEEKRAQSIVFGRVYLSRKTETVRHALLRRDDLKLVFYKAELDSKSV  
LELLIYGYFYRETPLDDGWLFELVHRNQIRTDDTKDDVISFRVDNSASAKKWSAAFADKLELDPTRG  
>NP\_001294044.2 Uncharacterized protein CELE\_C28C12.10 [Caenorhabditis elegans]  
MKYDMNHRKNSDDTPPASRTVKEMMAEFQNKLLDDGDNFRFRKQPPPPSPRRAPPPPPHRKPASLSPPPDDENTIRPPSSS  
ESSENIPEEPQELITPNTTRRSLGPKPTVAPKPLFLNGLLPSSSTSDVSSQNSPKCDPHPSCTTPTILVSPATSEYSNGV  
FFGANETNGSGVKDRARQLVNMGFVPRMQNGGTGTPSERPISQVSTLSQVSDEFDEGDTASDEESMNSEKHLRRHRHED  
DFDELPLPKNERKTTTVAATHSEIMNEMEHLFVRGGKKNNGVHKQQRQSNIDEIPSDVGKLRDNRKGRHNSL FVSPTSG  
MSSSSTDDFSRITSMTSDRSSILTSHSGGEDSTDGASVPDYETGDEKDDQRLKKLHYAAVEFLKVQNNYVQYLKEMAVL  
YPEYMERFGKRVGRDLLASHNGHENVVLQIKKIMVQILPIHEMLLKEIDKVCSNWDSRYPNMSKTIGTFADFLKCCQPFL  
DNKADFLNKLQLRNEDKEFDEATYMFETE VFVRGKKGAVIQQLDQVHQNFMR YKLLMLRYSEYLIDDCDEKEKAQEAIQ  
KLENTVQAVNQKMGLPTTEELTKLYYRFQCQFNVLPEGRVLIRQSEVMKQTRKELQPRYLVLFTDYLWICRVSSSGQFDI  
NRSYRIPLEYMKFERMEEDERIRCLQIRSRVKSALIIFSEKERNQWTDLTAKAYDRKSYKRRQSTAVQRHDENKKKMN  
KLLMLTPEVPDASDLERPQLIDSRSRSMSCSQDELSSVPVTPLDNGEIDETLGFGEVTRNGSGKKPPSEMIKPVWLPDN  
ISNECLMEGCSTEFNIINRRHHCRDCGWLICKFCKGQAPLSKYDFTKQNVCECFDRHYKAYKDGVLFP SKNMIVQSDET  
ILVKIGKRNDKEIVDPKLFKAPVNYGFRHRNVEEKRAQSIVFGRVYLSFRSRKTETVRHALLRRDDLKLVFYKAELDSK  
SVLELLIYGYFYRETPLDDGWLFELVHRNQIRTDDTKDDVISFRVDNSASAKKWSAAFADKLELDPTRG  
>NP\_510155.3 1-phosphatidylinositol-3-phosphate 5-kinase [Caenorhabditis elegans]  
MGDASELQFFEKLEPPPETEEPTPVSGGYFSNIIGQIFRSDGSPQPNGVVPPTTEERQNLERTESGESRTSEESGFQSRSLT  
DKFTGLLKSKVNPQLKDYND SNFKQYWMPDSTGRECYQCEERFTTFRRRHHCRLCGQIFCAKCCSSHIDGAALGYMGELR  
LCDYCARKVQRLAEEGKQTPTTSTTRSQTPVNSRKISFDRNTAHKNSDTVRTVSNGAIWSLCPPESSMPPEITSPPQLGS  
RRNSLAQSSNGPGVPTILSVADLCASNSAMLTNSHSHPMITEEEESGPDWFRMTMHPGMDGVINNETSDSADV FAYANLAG  
AITNEFTEMMDARAAEPTSATTDKITFPSLSLDESVMNAAKEEQRDNLEELFRNTERILDEV MKREYIREDKWRDLIL  
KSVYEVVENVTNVNPSGDTMNIADYVHVKKVHKKEGKVDSEIHWGVACSRSLVYKSLSEEDESSHTTESIMIVSGSIEYE  
RVSNKLSSIEPIVQEEKFLEKQIDRIATKRASLILVEGGVSHIAAQLLHKGRIKVA VNVKMSILQRISRATGADIVSNS  
DSQLVEQNLGCCPEFQQRNMQQEDGRIKTL MIFADCQKETGCTVLLHGDDLKELVAVKR VVQFLVTIVYSNYLEQSYLNA  
FNTTIARRQSDCVVCEKRAIVYSQGEKTEFEKNLYATMLSSSPVIEFEPPLLETATGRECPLIAYFKQPLYKLLKPGDV  
ELIKQGYEEDIVPIPKKEPLLVD RRHAFQAQCNRGAILDNVARSFRLFGGINFRRTAQIVKHKRIVETEKQPFRAKDVL D  
PRVHQTLAVLFGSFSRKSPNAPYFCVRPWVVS MQYYKDHDMTIGEFLVKFCFNRSYEC PSSNCEVPMLDHSRKL VYGKVC  
VEISTQTVNEAENAIESEQQKSIMTWRNCGKCNCSQMVKFDKAIWHL SFAKFLEYIGNSCFTTDTIYPITNQNC SHCF  
FHEKLYFFAMDNLVTTFKVIAIRPYSVVFSPHICSVKVLKVS RKELSDDVSRIATLALTACEDTNKQLAELDEEVQITPI  
VVKLAGAIRNTMALASESRMFAKNILSGDEDLIRSNDRLYREVTGT FMKVREVTYNLIALWNENCAA IKYPKRTPEDIQE  
IATLQKLENPFPSHLHLAIKLQPRLGVVVRDIQDTRGNFKPDIGSIIAYALSAVDY NKIPEAADTVSMDSASSSLKFSQM

DDGENLASSQHLEVEFEDESASYVVKMLYAEKFRKLRELLIAEGEETFIRSLSNSTFWTPQGGKSGSFFYRTQDDRFVVK  
QMSRFEIQSFVKFAPNYFDYLTTSATESKLTTLCKVYGVFRIGYKSKTTTLKVDILVMEYLFYNHNVSQVWDLKGSLRNR  
LASTGKSANEMVLLDENFVKDLWNQQLYVLPHKAAMNQAISNDSHFLSSQYIMDYSLLVGVDDDNGELILGIVDYMRTY  
TLDKKLESWVKIVAIPGAHLPTILSPEMYCARFSEAIDSYFPVVPDQWTGLGSIRSY

>NP\_001382742.1 PIP Kinase [Caenorhabditis elegans]

MGDASELQFFEKLEPPPETEPTVSVSSGGYFSNIIGQIFRSDGSPQPNGVVPPTTEERQNLERTESGESRTSEESGFQR  
SLTDKFTGLLKSKVNPQLKDYNDSNFKQYWMPDSTGRECYQCEERFTTFRRRHHCRLCGQIFCAKCCSSHIDGAALGYMG  
ELRLCDYCARKVQRLAEEGKQTPTTSTTRSQTPVNSRKISFDRNTAHKNSDTVRTVSNGAIWSLCPPESSMPPEITSPQ  
LGSRRNSLAQSSNGPGVPTILSVADLCASNSAMLTNSHSHPMITEEEESGPDWFRMTMHPGMDGVINNETSDSADVFAVAN  
LAGAITNEFTEMMDARAAEPTSATTDKITFPSLSLDESVMNAAKEEQRDNLEELFRNTERILDEVKREYIREDKWRD  
LILKSVYEVVENVTNVPSGDTMNIADYVHVKKVHKKEGKVDSEIHWGVACSRSLVYKSLSEEDESSHTTESIMIVSGSI  
EYERSVSNKLSSIEPIVQEEKFLEKQIDRIATKRASLILVEGGVSHIAAQLLHKRGIKVAVNVKMSILQRISRATGADIV  
SNSDSQLVEQNLGCCPEFQQRNMQQEDGRIKTLMIFADCQKETGCTVLLHGDDLKELVAVKRVVQFLVTIVYSNYLEQSY  
LNAFNTTIARRQSDCVVCEKRRRAIVYSQGEKTEFEKNLYATMLSSSPVIEFEPPLLETATGRECPLIAYFKQPLYKLLKP  
GDVELIKQGYEEDIVPIPKKEPLLVDRRHAFACQNRGAILDNVARSFRLFGGINFRRTAQIVKHKIVETEKQPFRAKD  
VLDPRVHQTALVLFSGFSRKSPNAPYFCVRPWVSMQYYKDHDMTIGEFLVKFCFNRSYECPSNCEVPMLDHSRKL VYG  
KVCVEISTQTVNEAENAIESEQQKSIMTWRNCGKCNCSQMVKFDKAIWHL SFAKFLEYIGNSCFTTDTIYPITNQNQCS  
HCFEHEKLYFFAMDNLVTTFKVIAIRPYSVVFSPHICSVKVLKVSRELSDDVSRATLALTACEDTNKQLAELDEEVQI  
TPIVVKLAGAIRNTMALASESRMFAKNILSGDEDLIRSNDRLYREVTGTGMKVREVTYNLIALWNENCAAIKYPKRTPED  
IQEIATLQKLENPFPSHLHLAIKLQPLRGVVVRDIQDTRGNFKPDIGSIIAYALSAVDYNKIPEAADTVSMDSASSSLKF  
SQMDDGENLASSQHLEVEFEDESASYVVKMLYAEKFRKLRELLIAEGEETFIRSLSNSTFWTPQGGKSGSFFYRTQDDRF  
VVKQMSRFEIQSFVKFAPNYFDYLTTSATESKLTTLCKVYGVFRIGYKSKTTTLKVDILVMEYLFYNHNVSQVWDLKGSL  
RNRRLASTGKSANEMVLLDENFVKDLWNQQLYVLPHKAAMNQAISNDSHFLSSQYIMDYSLLVGVDDDNGELILGIVDYM  
RTYTLDKKLESWVKIVAIPGAHLPTILSPEMYCARFSEAIDSYFPVVPDQWTGLGSIRSY

>NP\_001255656.1 WD40 and FYVE domain protein [Caenorhabditis elegans]

METRDERTLSLLHLRKTFFSEYLKIPVSGSRSDPSRLLPLFHKVMSMYTPQQLNAEFKEVVHFATFLCSVLVKEVRQRAA  
STGTIEAAQSIAEFLRPGTELKGYTILEAIRFLSSSEDEIMIDAACKVSLPSTLVKTIYLFDDLPA AATTVTVDLTENA  
TETEDMLKNNEKLHDMIGQIMEGLCRFKCVSEELVRKDDLLLLFVGTT SQVAEANN CWRLCARLLEVIADKSITNAVI  
KYVIVKKCVRIFVKNLSSAPSNSHSDAQKTAESIICLSCFLKNSAYLTDQLLDEFYEADGYTVIKDFLLKSETDNEIVRN  
ILLMAISLVNSGKFEITPQYTSGLVQLPAFQLPIPAGNGLSVRNLFALLYHV FLESTSEST SCTVIDILHSIYTC DPA  
NYFILDKEYPLSIFIDQLERKPHAVRVKLELIEFAVFQLSHIPCRELISLCVLLKTEISAGKTAMCTIIVQMCFLITV  
DAIKDAFREVGLLDALCFIIRRMFEMEYKNIQNASFTVTSTSSRSQDQLKLSLLTTDLLTIIKNNTENGKLFTECFGA  
KLLIEIVCEVNEEWRSSLLQLVKQLLIVAPTDQYIMHLVNTLQDRIPENLEVMFSLKALLGVVRESHKVRIQFRKSGG

FLALSALLLGLEKRFTDLHPAGDGRIPREQCQMLEFVHIIFKVFTLSMRFEPSNAKYFSTEITWDSITSLLRLTSIFNES  
TVISIEETEWKSLTHTDLASEIAACHEVFRLDDNIEAGNVPKGMPFNIFYGCVCRILFNMALDNYEKMSTDIRWNDDGA  
SLEESIVSWTSSLLVHPGAIISMLCLLPSISASSMKWTIAAQYYVSLLLKAILKSERNNQIMCQVDMPKHLLRIA EKLFL  
TENHILLQPFYYLLERLSYQSLTPNQLRSFLRLDSPLCCRSRDDDDDDDDSKIEIADNEG GPVPLQRVKALVSMMPTRD  
QYIGTAPSFVEFDMSVEGFAALYLPSLAPMFSTTKAERIFPPLNGFSFCTWIYLDALSDKKADAHPIRLLTVTRAVAPPN  
SDPPSKKPSQTAHLACFQCQFSAFDRSLLISTEESDQPGADLEKTANFQTDKLRITLADQVRCGEWFHLAVVFNRSVLK  
SSQVSLYLNGRHISTQKLMYVAQNAGGAATQLAQTYSVNAVVGTLPALRRPSRLRFRLASIFLAEEPMTAETVRAVVQLQ  
PHYIGNYQTASTAPLFHEEKIVFSLSAAATQELTLAKIRTMYGKMDAEILSQHLGISPNDHSTPLRVLCNTISHAPGAGR  
TFGGVIVGYLGMRTFTPRPVPSLLDSIGGFASVYGLIAMAVDSEGLYASLKSLSVAIRSQPRLLATWNNNRSYQILAVLL  
EDKAKMLNSHIMHMFVNVTGTADTSREHAPTISNPSAFEDLLCDLKVWKGAPSELHKMLLEHFYELITDHQLNNLQVVRK  
SSLLSRILLIHHDEPTMIKNTDEIIFNLISAIMQPQCDSRSILKIGQSIAATLPTSESECYEDSHLPFHISEIQKLFIES  
SDPPEALHQVYIRNRLNIIANFLANSNTQVQQQMCDQLVRTLGFDWLFALMSPGVHSGTIYLALRILLILNQPSLLA  
RFKEGSANGGWLSEADSVVRNRAAVVLGFSVSAHGGAVGSKIDINPELSNCGGFAALEHLMMAHADKPYPYYAMLSLLVG  
QPISALRFCDQFNMELVWTHVFGLNSTSSVF EAINSANFCFDAIIPLFAMIRTSIYHQSSIHQPWTVTNPSTVVQMITFM  
YQNSPAFFNIAHTDEFILALFSTLIEDTNAMGVKSEVANRRSQDGGGSPDAEYFQAFLAQPNVRIVMDLLKKICCDNLQV  
NTSKNDTIIDAILDNISESGNTRKTQIACLTSLHLSVLEHTVGTDLSSSALPPNTQAQNVQIVANISLLSSRAVD AFW  
NGLVFGSESMRMLSTLYHLQVIASKKV NKA VNAEPITGCIMRMTL FILSRPIDSVPVQLSVLDALSTLVSKRYLFLSSNE  
AWFFASLTHLIFMLS VTPDVL FQDNSSSSDLDR TSAQVAMCACRVWSDVICA KQALIEETFKKQSVTDINAARALLSHA  
GVYWQQFVDSQLRAIQTGGSSAQGS AVTAKDIIQQQISSKFNRVASGITRFAAKRSMSTTTALPSSGSVA AWKSTSTD KQ  
VIFMWLRVHVSLIKELVRAQSTRYTEWHAHV RKWCLHDWHQWEAELTRERGIWGPERASKLEKFKLDL TEGPTTRMRRKL  
IPNRNFYHIYPFRPHLEAPSAKAQRAKVAISFDSKPY YETCLRHRRTLDTRIIDSSNVSTASPEDGSGSSNLLGYSFTD  
LSQINSSLIRRLSTTAPATSNVSGTSLELNEEECETSERKEDDESISSEKTD SNGVQSSGPSTSSNTTKEAKKEEKE  
EKKAGPDNQTLRLLEQGEQLHSMFRCARIQGLETAEGLLL FGRDHFYVVDGFTLLKTKEIRDLDFLSQEMHDPVPYPA  
TGATQPPKSSRLCSKFSYNMIREVHKRRYLLQPIALEVFSSDGRNYLLAFPKKIRDRVFDKLTSMALN LSSGGSDSLGGQ  
KANVAIETTGRGASLLSSLIGQQSVTQRWLSGNISNFQYLMHLNTLAGRCYNDLSQYPIFPWVLADYTSSQLDFNNISTF  
RDFSKPMGAQSPDRLEQFLKRFR EWDDPSGETPPYMYGTHYSSAMIVVSYLVRLEPFTQQFLSLQGGHFDLADRMFHSVG  
DAWTSASRNNMADV KELIPEFFTLPEMFTNTNHFDLGVKQNGIHVNDVLLPAWCHGDPREFIRLHRQALES DYVSSHLHE  
WIDLIFGYKQNGEEAVKNSNLFHHLFYEGSVDFERIDDPLTRNATIGFVNNFGQIPTQLFKKPHPQKKVNILEGFSNTPG  
VTTSRLFYHAIHNMSAPQTPFKELRSAIGSIHQNDKIGVVVALEQNKVFIGTNRYITWGLPDRSVRMGQIDNDKSVCVHEM  
CEVDEMTCAAAGDETTLFCGNTSGCITVWKVNNKPLSMKKLSVLNGHSDAITCLVSCQSHAVLVSASRD LTVLVWHLSEM  
FLIRQLPKHPHAVLAVAVNDATGDIATACSTLLHVWTLNGELLAVLNTCDVAPAIDPQQMIISLAFSTMNEW DNDNVIMC  
GTSDGIVKIYSCVVFENDGSVSEHPALENPNSNSNENHDRSAAIAARLEKQRKRLKNSSTTATSSSVSGSGSASLTSPGP  
ASPSAGGS RATNIDVGGAQFVRVLVQRTALTMHTAFNRPDNVHPAPITAIAPSRDHRSLYVGDGIGRVWCWQSAEGGGRA

DHWVQDVTRQRCDDCEHKFTLADRKHHCRNCGQIFCSTCSRFEHITRMNISRPVRVCRKCFQRLQQSSNLHNL  
 >NP\_001255659.1 WD40 and FYVE domain protein [Caenorhabditis elegans]  
 METRDERTLSLLHLRKTSEYLKIPVSGSRSDPSRLLPLFHKVMSMYTPQQLNAEFKEVVHFATFLCSVLVKEVRQRAA  
 STGTIEAAQSIAEFLRPGTELKGYTILEAIRFLLSSEDEIMIDAACKVSLPSTLVKTIYLFDDLPA AATTVTVDLTENA  
 TETEDMLKNNEKLHDMIGQIMEGLCRFKCVSEELVRKDDLLLLFVGTT SQVAEANN CWRKLCARLLEVIADKSITNAVI  
 KYVIVKKCVRIFVKNLSSAPSN SHSDAQKTAESIICLSCFLKNSAYLTDQLLDEFYEADGYTVIKDFLLKSETDNEIVRN  
 ILLMAISLVNSGKFEITPQYTSGLVQLPAFQLPIPAGNGLSVRN LNAFALLYHVFLESTSEST SCTVIDILHSIYTC DPA  
 NYFILDKEYPLSIFIDQLERKPHAVRVK LLELIEFAVFQLSHIPCRELISLCVLLKTEISAGKTAMCTIIVQMCFKLITV  
 DAIKDAFREVGLLDALCFIIRRMFEMEYKNIQNASFTVTSTSSRSQDQLKLSLLTTDLLTIIKNNTENGKLFTECFGA  
 KLLIEIVCEVNEEWRSLLQLVKQLLIVAPT DQYIMHLVNTLQDRIPENLEV MFSLKALLGVVRESHKVRIQFRKSGG  
 FLALSALLGLEKRFTDLHPAGDGRIPREQCQM LEFVHIIFKVFTLSMRFEPSNAKYFSTEITWDSITSLLRLTSIFNES  
 TVISIEETEWKSLTHTDLASEIAACHEVFRLDDNIEAGNVPKGM PFNIYFGCYVCRLIFNMALDNYEKM TSDIRWNDDGA  
 SLEESIVSWTSSLLVHPGAIISMLCLLPSISASSMKWTIAAQYYV SLLLKAILKSERNQQIMCQVDM PKHLLRIA EKLFL  
 TENHILLQPFYYLLERLSYQSLTPNQLRSFLRLDSPLCCRS LDDDEDDDDDDSKIEIADNEG GPVPLQRVKALVSM MTPRD  
 QYIGTAPSFVEFDMSVEGFAALY LPSLAPMFSTTKAERIFPPLNGFSFCTWIYLDALSDKKADAHPIRLLTVTRAVAPPN  
 SDPPSKKPSQTAHLACFQCQFSAFDRSLLISTEESDQPGADLEKTANFQTDK LIRITLADQVRCGEWFHLAVVFNRSVLK  
 SSQVSLYLNGRHISTQKLMYVAQNAGGAATQLAQ TYSVNAVVGTLPALRRPSRLRFRLASIFLAEEPMTAETVRAVVQLQ  
 PHYIGNYQTASTAPLFHEEKIVFSLSAAATQELTLAKIRTMYGKMDAEILSQHLGISPN DHSTPLRVLCNTISHAPGAGR  
 TFGGVIVGYLGMRTFTPRPVPSLLDSIGGFASVYGLIAMAVDSEGLYASLKS LVS AIRSQPRLLATWNNNR SYQILAVLL  
 EDKAKMLNSHIMHMFVNTGTADTSREHAPTISNPSAFEDLLCDLK VWK GAPSELHKMLLEHFYELITDHQLNNLQVV RK  
 SSLLSRILLIHHDEPTMIKNTDEIIFNLISAIMQPQCDSRSILKIGQSIAATLPTSESECYEDSHLPFHISEIQKLFIES  
 SDPPPEALHQVYIRNRLLNIIANFLANSNTQVQQQMCDQLVRTLGFDFWLFALMSPGVHSGTIYLALRILLILNQPSLLA  
 RFKEGSANGGWLSEADSVVRNRAAVVLGFSVSAHGGAVGSKIDINPELSNCGGFAALEHLM AAHADKPYPYYAMLSLLVG  
 QPISALRFCDQFN MELVWTHVFGLNSTSSVFEAIN SANFCFDAIIPLFAMIRTSIYHQSSIHQPWTVTNPSTVVQMITFM  
 YQNSPAFFNIAHTDEFILALFSTLIEDTNAMGVKSEVANRRSQDGGGSPDAEYFQAFLAQPNVRIVMDLLKKICCDNLQV  
 NTSKNDTIIDAILDNISESGNTRKTQIACLTSL LHSVLEHTVGTDLLSSSALPPNTQAQNIVQIVANISLLSSRAVD AFW  
 NGLVFGSESMRMLSTLYHLQVIASKKV NKA VNAEPITGCIMRMTL FILSRPIDSVPVQLSVLDALSTLVSKRYLFLSSNE  
 AWWFASLTHLIFMLS VTPDVL FQDNSSSSDLDR TSAQVAMCACRVWSDVICA KQALIEETFKKQSVTDINAARALLSHSA  
 GVYWQQFVDSQLRAIQTGGSSAQGS AVTAKDIIQQQISSKFNRVASGITRFAAKRSMSTTTALPSSGSVA AWKSTSTDKQ  
 VIFMWLRVHVSLIKELVRAQSTRYTEWHAHV RKWCLHDWHQWEAELTRERGIWGP ERASKLEKFKLDL TEGPTTRMRRL  
 IPNRNFYHIYPFRPHLEAPSAKAQRAKVAISFDSKPY YETCLRHRRTLDTRIIDSSNVSTASPEDGSGSSNLLGYSFTD  
 LSLSEINSSLIRRLSTTAPATSNVSGTSLELNEEECETSERKEDDESIS SISEKTDSNGVQSSGPSTSSNTTKEAKKEEK  
 KEEKKAGPDNQTLRLLEQGEQLHSMFRCARIQGLETAEGLLLFGRDHFYVVDGFTLLKTKEIRDLD FL SQEMHDPVPY

PATGATQPPKSSRLCSKFSYNMIREVHKRRYLLQPIALEVFSSDGRNYLLAFPKKIRDRVFDKLTSMALNLSGGSDSLG  
GQKANVAIETTGRGASLLSSLIQQSVTQRWLSGNISNFQYLMHLNTLAGRCYNDLSQYPIFPWVLADYTSSQLDFNNIS  
TFRDFSKPMGAQSPDRLEQFLKRFREWDDPSGETPPYMYGTHYSSAMIVVSYLVRLEPFTQQFLSLQGGHFDLADRMFHS  
VGDAWTSASRNNMADVKELIPEFFTLPEMFTNTNHFIDLGVKQNGIHVNDVLLPAWCHGDPREFIRLHRQALES DYVSSHL  
HEWIDLIFGYKQNGEEAVKNSNLFHHLFYEGSVDFERIDDP LTRNATIGFVNNFGQIPTQLFKKPHPQKKVNILEGFSNT  
PGVTT SRLFYHAIHNMSAPQTPFKELRSAIGSIHQNDKIGVVVALEQNKVFIGTNRYITWGLPDRSVRMGQIDNDKSVCVH  
EMCEVDEMTC AAAGDETTLFCGNTSGCITVWKVNNKPLSMKKLSVLNGHSDAITCLVSCQSHAVLVSASRDLTVLVVHLS  
EMFLIRQLPKHPHAVLAVAVNDATGDIATACSTLLHVWTLNGELLA VLNTCDVAPAIDPQQMIISLAFSTMNEWNDNDVI  
MCGTSDGIVKIYSCVVFENDGSVSEHPALENPNNSNENHDSAAIAARLEKQRKRLKNSSTTATSSSVSGSGSASLTSP  
GPASPSAGGS RATNIDVGGAQFVRVLVQRTALTMHTAFNRPDNVHPAPITAIAPSRDHRSLYVGDGIGRVWCWQSAEGGG  
RADHWVQDVTRQRCDDCEHKFTLADRKHHCRNCGQIFCSTCSRFE SHITRMNISRPVRVCRKCFQRLQQSSNLHNL  
>NP\_001255657.1 WD40 and FYVE domain protein [Caenorhabditis elegans]  
METRDER TSLHLRKT FSEYLKIPVSGSRSDPSRLLPLFHKVMSMYTPQQ LNAEFKEVVHFATFLCSVLVKEVRQRAA  
STGTIEAAQSIAEFLRPGTELKGYTILEAIRFLSSSEDEIMIDAACKVSLPSTLVKTIYLFDDLPA AATTVTVDLTENA  
TETED EMLKNNEKLHDMIGQIMEGLCRFKCVSEELVRKDDLLLLFVGTT SQVAEANN CWRKLCARLLEVIADKSITNAVI  
KYVIVKKCVRIFVKNLSSAPSN SHSDAQKTAESIICLSCFLKNSAYLTDQLLDEFYEADGYTVIKDFLLKSETDNEIVRN  
ILLMAISLVNSGKFEITPQYTSGLVQLPAFQLPI PAGNGLSVRN LNAFALLYHV FLESTSEST SCTVIDILHSIYTC DPA  
NYFILDKEYPLSIFIDQLERKPHAVRVK LLELIEFAVFQLSHIPCRELISLCVLLKTEISAGKTAMCTIIVQMCFKLITV  
DAIKDAFREVGLLDALCFIIRMFEMEYKNIQNASFTVTSTSSRSQDQLKLSLLTTDLLTIIKNNTENGKLFTECFGA  
KLLIEIVCEVNEEWRSLLQLVKQLLIVAPT DQYIMHLVNTLQDRIP IENLEV MFSLKALLGVVRESHKVRIQFRKSGG  
FLALSALLGLEKRFTDLHPAGDGRIPREQCQM LEFVHIIFKVFTLSMRFEPSNAKYFSTEITWDSITSLLRLTSIFNES  
TVISIEETEWKSLTHTDLASEIAACHEVFRLDDNIEAGNV PKGMPFN IYFGCYVCRLIFNMALDNYEKM TSDIRWND DGA  
SLEESIVSWTSSLLVHPGAIISMLCLLPSISASSMKWTIAAQYYV SLLLKAILKSERNNQQIMCQVDM PKHLLRIA EKLFL  
TENHILLQPFYLLERLSYQSLTPNQLRSFLRLDSPLCCRS LDDDEDDDDDDSKIEIADNEG GPVPLQRVKALVSM MTPRD  
QYIGTAPSFVEFDMSVEGFAALYLPSLAPMFSTTKAERIFPPLNGFSFCTWIYLDALSDKKADAHPIRLLT VTRAVAPPN  
SDPPSKKPSQTAHLACFQCQFSAFDRSLLISTEESDQPGADLEKTANFQTDKLIRITLADQVRCGEWFHLAVVFNRSVLK  
SSQVSLYLNGRHISTQKLMYVAQNAGGAATQLAQ TYSVNAVVGTLPALRRPSRLRFRLASIFLAEEPMTAETVRAVVQLQ  
PHYIGNYQTASTAPLFHEEKIVFSLSAAATQELTLAKIRTMYGKMDAEILSQHLGISPN DHSTPLRVLCNTISHAPGAGR  
TFGGVIVGYLGMRTFTPRPVPSLLDSIGGFASVYGLIAMAVDSEGLYASLKS LVS AIRSQPRLLATWNNNR SYQILAVLL  
EDKAKMLNSHIMHMFVNVTGTADTSREHAPTISNPSAFEDLLCDLKVWKGAPSELHKMLLEHFYELITDHQLNNLQVVRK  
SSLLSRILLIHHDEPTMIKNTDEIIFNLISAIMQPQCDSRSILKIGQSIAATLPTSESECYEDSHLPFHISEIQKLFIES  
SDPPEALHQVYIRNRLLNIIANFLANSNTQVQQQMCDQLVRTLGFDFWLFALMSPGVHSGTIYLA LRILLILNQPSLLA  
RFKEGSANGGWLSEADSVVRNRAAVVLGFSVSAHGGAVGSKIDINPELSNCGGFAALEHLM AHAHADKPYPY YAMLSLLVG



QPISALRFCDQFNMELVWTHVFGLNSTSSVFEAINSANFCFDAIIPLFAMIRTSIYHQSSIHQPWTVTNPSTVVQMITFM  
 YQNSPAFFNIAHTDEFILALFSTLIEDTNAMGVKSEVANRRSQDGGGSPDAEYFQAFLAQPNVRIVMDLLKKICCDNLQV  
 NTSKNDTHIDAILDNISESGNTRKTQIACLTSLHHSVLEHTVGTDLSSSALPPNTQAQNIVQIVANISLLSSRAVDFAW  
 NGLVFGSESMRMLSTLYHLQVIASKKVNKAVNAEPITGCIMRMTLFIILSRPIDSVPVQLSVLDALSTLVSKRYLFLSSNE  
 AWFFASLTHLIFMLS VTPDVL FQFQDNSSSSDLDR TSAQVAMCACRVWSDVICAKQALIEETFKKQSVTDINAARALLSH  
 SAGVYWQQFVDSQLRAIQTGGSSAQGSAVTAKDIIQQQISSKFNRVASGITRFAAKRSMSTTTALPSSGSVAAWKSTSTD  
 KQVIFMWLRVHVSLIKELVRAQSTRYTEWHAHVVRKWCLHDWHQWEALTRERGIWGPERSKLEKFKLDL TEGPTTRMR  
 R  
 KLIPNRNFYHIYPFRPHLEAPSAKAQRAKVAISFDSKPYEYETCLRHRRTLDTRIIDSSNVSTASPEDGSGSSNLLGYSF  
 TDLSQINSSLIRRLSTTAPATSNVSGTSLELNEECETSERKEDDESISSEKTDSDNGVQSSGPSTSSNTTKEAKKEEK  
 KEEKKAGPDNQTLRLLEQGEQLHSMFRCARIQGLETAEGLLLFRGRDHFYVVDGFTLLKTKEIRDLDLFLSQEMHDPVY  
 PATGATQPPKSSRLCSKFSYNMIREVHKRRYLLQPIALEVFSSDGRNYLLAFPKKIRDRVFDKLTSMALNLSGSDSLG  
 GQKANVAIETTGRGASLLSSLIGQQSVTQRWLSGNISNFQYLMHLNTLAGRCYNDLSQYPIFPWVLADYTSSQLDFNNIS  
 TFRDFSKPMGAQSPDRLEQFLKRFREWDPSGETPPYMYGTHYSSAMIVVSYLVRLEPFTQQFLSLQGGHFDLADRMFHS  
 VGDAWTSASRNNMADVKELIPEFFTLPEMFTNTNHFIDLGVKQNGIHVNDVLLPAWCHGDPREFIRLHRQALES DYVSSH  
 HEWIDLIFGYKQNGEEAVKNSNLFHHLFYEGSVDFERIDDPLTRNATIGFVNNFGQIPTQLFKKPHPQKKVNILEGFSNT  
 PGVTTSRLFYHAIHNMSAPQTPFKELRSAIGSIHQNDKIGVVALEQNKVFIGTNR YITWGLPDRSVRMGQIDNDKSVCVH  
 EMCEVDEMTC AAAGDETTLCGNTSGCITVWKVNNKPLSMKKLSVLNGHSDAITCLVSCQSHAVLV SASRDLTVLVWHLS  
 EMFLIRQLPKPHAVLAVAVNDATGDIATACSTLLHVWTLNGELLAVLNTCDVAPAIDPQQMIISLAFSTMNEWNDNDVI  
 MCGTSDGIVKIYSCVVFENDGSVSEHPALENPNNSNENHDSAAIAARLEKQRKRLKNSSTTATSSSVSGSGSASLTSP  
 GPASPSAGGS RATNIDVGGAQFVRVLVQRTALTMHTAFNRPDNVHPAPITAIAPSRDHRSLYVG DGIGRVWCWQSAEGGG  
 RADHWVQDVTRQRCDDCEHKFTLADRKHHCRCNGQIFCSTCSR FESHITRMNISRPVRVCRKCFQRLQQSSNLHNL  
 >NP\_001255658.1 WD40 and FYVE domain protein [Caenorhabditis elegans]  
 METRDERTLSLLHLRKT FSEYLKIPVSGSRSDPSRLLPLFHKVMSMYTPQQLN AEFKEVVHFATFLCSVLVKEVRQRAA  
 STGTIEAAQSIAEFLRPGTELKGYTILEAIRFLLSSEDEIMIDAACKVSLPSTLVKTIYLFDDLPA AATTVTVDLTENA  
 TETEDMLKNNEKLHDMIGQIMEGLCRFKCVSEELVRKDDLLLLFVGTT SQVAEANN CWRKLCARLLEVIADKSITNAVI  
 KYVIVKKCVRIFVKNLSSAPSN SHSDAQKTAESIICLSCFLKNSAYLTDQLLDEFYEADGYTVIKDFLLKSETDNEIVRN  
 ILLMAISLVNSGKFEITPQYTSGLVQLPAFQLPIAGNGLSVRN LNAFALLYHV FLESTSEST SCTVIDILHSIYTC DPA  
 NYFILDKEYPLSIFIDQLERKPHAVRVK LLELIEFAVFQLSHIPCRELISLCVLLKTEISAGKTAMCTIIVQMCFKLITV  
 DAIKDAFREVGLLDALCFIIRRMFEMEYKNIQNASFTVTSTSSRSQDQLKLSLLTTDLLTIIKNNTENGKLFTECFGA  
 KLLIEIVCEVNEEWRSSLLQLVKQLLIVAPT DQYIMHLVNTLQDRIPENLEV MFSLKALLGVVRESHKVRIQFRKSGG  
 FLALSALLGLEKRFTDLHPAGDGRIPREQCQMLEFVHIIFKVFTLSMRFEPSNAKYFSTEITWDSITSLLRLTSIFNES  
 TVISIEETEWKSLTHTDLASEIAACHEVFRLDDNIEAGNVPKGMPFN IYFGCYVCRLIFNMALDNYEKM TSDIRWNDDGA

SLEESIVSWTSSLLVHPGAIISMLCCLPSISASSMKWTIAAQYYVSLLLKAILKSERNQQIMCQVDMPKHLLRIA EKLFL  
TENHILLQPFYLLERLSYQSLTPNQLRSFLRLDSPLCCRS LDDDEDDDDDDSKIEIADNEG GPVPLQRVKALVSMMPTRD  
QYIGTAPSFVEFDMSVEGFAALYLP SLAPMFSTTKAERIFPPLNGFSFCTWIYLDALSDKKADAHPIRLLTVTRAVAPPN  
SDPPSKKPSQTAHLACFQCQFSAFDRSLLISTEESDQPGADLEKTANFQTDKLIRITLADQVRCGEWFHLAVVFNRSVLK  
SSQVSLYLNGRHISTQKL MYVAQNAGGAATQLAQTYSVNAVVGTLPALRRPSRLRFRLASIFLAEEPMTAETVRAVVQLQ  
PHYIGNYQTASTAPLFHEEKIVFSLSAAATQELTLAKIRTMYGKMDAEILSQHLGISPN DHSTPLRVLCNTISHAPGAGR  
TFGGVIVGYLGMRTFTPRPVPSLLDSIGGFASVYGLIAMAVDSEGLYASLKSLSVAIRSQPRL LATWNNNRSYQILAVLL  
EDKAKMLNSHIMHMFVNVTGTADTSREHAPTISNPSAFEDLLCDLKVWK GAPSELHKMLLEHFYELITD HQLNNLQVVRK  
SSLLSRILLIHHDEPTMIKNTDEIIFNLISAIMQPQCDSRSILKIGQSIAATLPTSESECYEDSHLPFHISEIQKLFIES  
SDPPPEALHQVYIRNRLLNIIANFLANSNTQVQQQMCDQLVRTLGFDWLFALMSPGVHSGTIYLA LRILLILNQPSLLA  
RFKEGSANGGWLSEADSVVRNRAAVVLGFSVSAHGGAVGSKIDINPELSNCGGFAALEHLM AHAHADKPYPYYAMLSLLVG  
QPISALRFCDQFN MELVWTHVFGLNSTSSVFEAINSANFCFDAIPLFAMIRTSIYHQSSIHQPWTVTNPSTVVQMIFM  
YQNSPAFFNIAHTDEFILALFSTLIEDTNAMGVKSEVANRRSQDGGGSPDAEYFQAFLAQPNVRIVMDLLKKICCDNLQV  
NTSKNDTHIDAILDNISESGNTRKTQIACLTSLH SVLEHTVGTDLLSSSALPPNTQAQNIVQIVANISLLSSRAVD AFW  
NGLVFGSESMRMLSTLYHLQVIASKKV NKA VNAEPITGCIMRMTL FILSRPIDSVPVQLSVLDALSTLVSKRYLFLSSNE  
AWFFASLTHLIFMLS VTPDVL FQFQDNSSSSDLDR TSAQVAMCACRVWSDVICAKQALIEETFKKQSVTDINAARALLSH  
SAGVYWQQFVDSQLRAIQ TGGSSAQGSAVTAKDIIQQQISSKFNRV ASGITRFAAKRSMSTTTALPSSGSVA AWKSTSTD  
KQVIFMWLRVHVSLIKELVRAQSTRYTEWHAHV RKWCLHDWHQWEAELTRERGIWGP ERASKLEKFKLDL TEGPTTRMR  
R  
KLIPNRNFYHIYPFRPHLEAPSAKAQRAKVAISFDSKPY YETCLRHRRTLDTRIIDSSNVSTASPEDGSGSSNLLGYSF  
TDLSLSEINSSLIRRLSTTAPATSNVSGTSLELNEEECETSERKEDDESISSEKTD SNGVQSSGPSTSSNTTKEAKKE  
EKKEKKAGPDNQTLRLLEQGEQLHSMFRCARIQGLETAEGLLL FGRDHFYVVDGFTLLKTKEIRDLDFLSQEMHDPV  
PYPATGATQPPKSSRLCSKF SYNMIREVHKRRYLLQPIALEVFSSDGRNYLLAFPKKIRDRVFDKLTSMALNSSGSDS  
LGGQKANVAIETTGRGASLLSSLIGQQSVTQRWLSGNISNFQYLMHLNTLAGRCYNDLSQYPIFPWVLADYTSSQLDFNN  
ISTFRDFS KPMGAQSPDRLEQFLKRFREWDDPSGETPPYMYGTHYSSAMIVVSYLVRLEPFTQQFLSLQGGHFDLADRMF  
HSVGDAWTSASRNNMADV KELIPEFFTLPEMFTNTNHFDLGVKQNGIHVNDVLLPAWCHGDPREFIRLHRQALES DYVSS  
HLHEWIDLIFGYKQNGEEAVKNSNLFHHLFYEGSVDFERIDDP LTRNATIGFVNNFGQIPTQLFKKPHPQKKVNILEGFS  
NTPGVTT SRLFYHAIHNMSAPQTPFKELRSAIGSIHQNDKIGVVALEQNKVFIGTNRYITWGLPDRSVRMGQIDNDKSVC  
VHEMCEVDEMTC AAAGDETTLFCGNTSGCITVWKVNNKPLSMKKLSVLNGHSDAITCLVSCQSHAVLVSASRD LTVLVWH  
LSEMFLIRQLPKHPH AVLA VAVNDATGDIATACSTLLHVWTLNGELLA VLN TCDVAPAIDPQQMIISLAFSTMNEWDNDN  
VIMCGTSDGIVKIYSCVVFENDGSVSEHPALENPNSNSNENHDRSAAIAARLEKQRKRLKNSSTTATSSSVSGSGSASLT  
SPGPASPSAGGS RATNIDVGGAQFVRVLVQRTALTMHTAFNRPDNVHPAPITAIAPSRDHRSLYVGDGIGRVWCWQSAEG  
GGRADHWVQDVTRQRCDDCEHKFTLADRKHHCRCNCGQIFCSTCSR FESHITRMNISRPVRVCRKCFQRLQQSSNLHNL

>NP\_001252086.1 Uncharacterized protein CELE\_F22G12.4 [Caenorhabditis elegans]

MTAALLYRLIDGNTKNVLHSIVSIGREDVLFLYFMQNSAKIPKILNDLDPQGASALEIALCSEHEKSRQIAAQLVEKGAD  
VNVKDAERGETILMRMCRKENLSAMDFLLGNGADGRDSQSPGDYNVHVASRIPSPALATWISENKEKLDLDKVD AEERT  
PLICAVMANNHIMCETLIRSGVNCDVTTSEGHTALSTCLLMSDAPNRRIAELLMLNGAGVNF AICDSKTPFFNEIVSRKD  
VASVEALLAANVDCHVADGRGQTACHVAAEAGAPEILSKIVEARRGLKWPRDADDRTALDIAVEKRD LKSARICIKGGAD  
VNARDANGQTLLVKAILANDDEMGMVFLIEHDAKAKNDERISSKTYVEAACERGLLNTVRSFISNGCKLNSRCSTGYSL LH  
SALSHQKLDVASLLVNFGCDVESRVALGAGGEVLDDGDESWITKQTLLHRLIDDGDQQS AVFLIESGADV NARKEYRNPT  
DDDQFTPAHMAVSWAQNDVLRALRDHSANLCDVDS DGRTPAHIGVREQNVDGVKILLDAENVEFIPIRDKFGQTILSQAM  
AMKDHQIASLIVARQPHAAVQTNGNGENLLHQAIRQNDIESVLFLLA VAKADPCRPTDGS LKTPHLAAIAKDEMILRN  
LILVNDDVNVTSADGTTPLLEALKARNDKHAAILMENGAEPNVKDEYGENAMLC AVRSGSLDCIRAVADSSRTNRYARNK  
IGYTS LHICALLTIDKLPKRTSSSDVIELVLIYAEEEEAAQNEKQFAGFIDARDADGNTALMIAYSQGNAGVCRSLLKRR  
ACMGQRNNGDVNVFTYETATKQLLLGLLESLEAEPRWSDGDT CDCGARFSLTSRKHHCRHCGRHVCSKCSETTMPIAKYG  
EEKRVRVCDVCAHVISTGTAPRR

>NP\_001252087.1 Uncharacterized protein CELE\_F22G12.4 [Caenorhabditis elegans]

MRMCRKENLSAMDFLLGNGADGRDSQSPGDYNVHVASRIPSPALATWISENKEKLDLDKVD AEERTPLICAVMANNHIM  
CETLIRSGVNCDVTTSEGHTALSTCLLMSDAPNRRIAELLMLNGAGVNF AICDSKTPFFNEIVSRKDVASVEALLAANVD  
CHVADGRGQTACHVAAEAGAPEILSKIVEARRGLKWPRDADDRTALDIAVEKRD LKSARICIKGGADV NARDANGQTLLV  
KAILANDDEMGMVFLIEHDAKAKNDERISSKTYVEAACERGLLNTVRSFISNGCKLNSRCSTGYSL LHSALSHQKLDVASL  
LVNFGCDVESRVALGAGGEVLDDGDESWITKQTLLHRLIDDGDQQS AVFLIESGADV NARKEYRNPTDDDQFTPAHMAVS  
WAQNDVLRALRDHSANLCDVDS DGRTPAHIGVREQNVDGVKILLDAENVEFIPIRDKFGQTILSQAMAMKDHQIASLIVA  
RQPHAAVQTNGNGENLLHQAIRQNDIESVLFLLA VAKADPCRPTDGS LKTPHLAAIAKDEMILRN LILVNDDVNV TSA  
DGTTPLLEALKARNDKHAAILMENGAEPNVKDEYGENAMLC AVRSGSLDCIRAVADSSRTNRYARNKIGYTS LHICALLT  
IDKLPKRTSSSDVIELVLIYAEEEEAAQNEKQFAGFIDARDADGNTALMIAYSQGNAGVCRSLLKRRACMGQRNNGDVNV  
FTYETATKQLLLGLLESLEAEPRWSDGDT CDCGARFSLTSRKHHCRHCGRHVCSKCSETTMPIAKYGE EKRVRVCDVCAH  
VISTGTAPRR

>NP\_001252085.1 Uncharacterized protein CELE\_F22G12.4 [Caenorhabditis elegans]

MGSNKEPKIDYLDILKEQFNALQSEHLELRRKYELECSSSTPDSFPSRLLSLTSSLLEKPRFSDVTFKFAGNSLKSVPAH  
KYVLAARTDFWK FENG GDEKSEIQISDDVD FEAHV AIRWIYTDEIDLKMEDEKLLKVCETATSFRLEQLKNVCVQQLGA  
RLHVDNCIKIYEF AEKQSLRQLSTVAGSMIAGAWPKLGPAHF AQMTAALLYRLIDGNTKNVLHSIVSIGREDVLFLYFMQ  
NSAKIPKILNDLDPQGASALEIALCSEHEKSRQIAAQLVEKGADV NVKDAERGETILMRMCRKENLSAMDFLLGNGADGR  
DSQSPGDYNVHVASRIPSPALATWISENKEKLDLDKVD AEERTPLICAVMANNHIMCETLIRSGVNCDVTTSEGHTALS  
TCLLMSDAPNRRIAELLMLNGAGVNF AICDSKTPFFNEIVSRKDVASVEALLAANVDCHVADGRGQTACHVAAEAGAPEI  
LSKIVEARRGLKWPRDADDRTALDIAVEKRD LKSARICIKGGADV NARDANGQTLLVKAILANDDEMGMVFLIEHDAKAKN

DERISSKTYVEAACERGLLNTVRSFISNGCKLNSRCSTGYSLLSALSHQKLDVASLLVNFGCDVESRVALGAGGEVLDD  
GDESWITKQTLHLRLIDDGDQQSAVFLIESGADVNRKEYRNPTDDDDQFTP AHMAVSWAQNDVLRALRDHSANLCDVDSD  
GRTPAHIGVREQNVDGVKILLDAENVEFIPIRDKFGQTILSQAMAMKDHQIASLIVARQPHAAVQTNGNGENLLHQAIRQ  
NDIESVLFLLA VAKADPCR PITDGS LKTPHLAAIAKDEMILRNILVNDDVNVTSADGTTPLLEALKARNDKHAAILME  
NGAEPNVKDEYGENAMLC AVRSGSLDCIRAVADSSRTNRYARNKIGYTS LHICALLTIDKLPKRTSSSDVIELVLIY AEE  
EAQAQNEKQFAGFIDARDADGNTALMIAYSQGNAGVCRSLLKRRACMGQRNNGDVNVFTYETATKQLLLGLLESLEAEPR  
WSDGDTCDCGARFSLTSRKHHCRHCGRHVCSKCSETTMPIAKYGEERKVRVCDVCAHVISTGTAPRR

>NP\_001022794.2 Myotubularin-related protein 3 [Caenorhabditis elegans]

MTVTSSAAIDIGGGGGGRRSDRLSDRTSEDMSFIAS PANESFQIGASFVDVQNESSGSIDTATATLHELNYTFGMPPVT  
E ESENMPQNYETVVELLPGEERAPINKL TEFPIEGGSLFVTNFRIVVILKDKEVEEALRFLVFPLQDIEQIDLAIPAFIH  
LSLKIGRMFTICFKTAEDAALVHKILYTA FQRLNRPIS SIYTSRPQDWTSKNTDNPMQSLNAFAWK FSEA VDELDRDGKL  
PSWLLRADSV AQEITHIDFNRLGMSEHFQISSVNENFEVCPTYPEKIIVPKGITDDDIRKGAPYRSIGRFP AVIWRCRKT  
RAVLMRSSQPQVGILSWRNPTDEKIIIEEAVKASRIEGEEKKQFIIMDARGYTS AFANRARS GGFENTEYYQQA KLEFLGL  
PNIHAVRG SFNNVRTMLHNLGPNEQLLTS LQTTGWLLNLSNLLVNAANCADHLSKGHSVLVHCSDGWDRTTQVTTLAKIM  
LDEYYRTVKGFEE LIRRDWIAFGHKLYDRQLVAFGNWGTS DERSPVFLQFLEAVRHLQREQPTLFQFTHAYLIK LAKHAY  
SGLFGSFLFN SHKERREAMEKCKGTLVDIWRFIGPHNEEYVNQSFDEHYTGAVKPVNVSVINLRVWHEVFAD EEEHYTQI  
FSPKEERPLSGCTTPMNTSTSTNLVKS KSSESINSLNVDGSAKES SQQHPTCSTTPSDNTNSLPMSTSFIQQSLYQPKVR  
GVAAIDRDGVIRFEDDEQAMLRKKKNKLRAEEIRRKDEKIEELRRRAVLDTNKVSPGQRQSYSESDVETTGT LERVMSDVS  
MVDPVNELPHFKPNTTWEGESGHCA YCKKEFNKLSVYVEDRQHHCRCNCGRVVCEDCSKNRFSVIEEGKSVQKRACDSCYD  
SMHETDLKLSSSSTTTTSSSTKIENDSNVPGLDNNSDNVSENVSENAIPDIIVEEKEAEDPIKEAESPSKETKCPKTLRN  
FISFSPKSSMRKNKVHSRDPLKSIDEGSSSQQAESDDVLDVNEQPL

>NP\_497766.3 Myotubularin-related protein 3 [Caenorhabditis elegans]

MTVTSSAAIDIGGGGGGRRSDRLSDRTSEDMSFIAS PANIGASFVDVQNESSGSIDTATATLHELNYTFGMPPVTEESE  
NMPQNYETVVELLPGEERAPINKL TEFPIEGGSLFVTNFRIVVILKDKEVEEALRFLVFPLQDIEQIDLAIPAFIHLSLK  
IGRMFTICFKTAEDAALVHKILYTA FQRLNRPIS SIYTSRPQDWTSKNTDNPMQSLNAFAWK FSEA VDELDRDGKLPSWL  
LRADSV AQEITHIDFNRLGMSEHFQISSVNENFEVCPTYPEKIIVPKGITDDDIRKGAPYRSIGRFP AVIWRCRKT  
RAVLMRSSQPQVGILSWRNPTDEKIIIEEAVKASRIEGEEKKQFIIMDARGYTS AFANRARS GGFENTEYYQQA KLEFLGLPNIH  
AVRG SFNNVRTMLHNLGPNEQLLTS LQTTGWLLNLSNLLVNAANCADHLSKGHSVLVHCSDGWDRTTQVTTLAKIMLDEY  
YRTVKGFEE LIRRDWIAFGHKLYDRQLVAFGNWGTS DERSPVFLQFLEAVRHLQREQPTLFQFTHAYLIK LAKHAYSGLF  
GSFLFN SHKERREAMEKCKGTLVDIWRFIGPHNEEYVNQSFDEHYTGAVKPVNVSVINLRVWHEVFAD EEEHYTQIFSPK  
EERPLSGCTTPMNTSTSTNLVKS KSSESINSLNVDGSAKES SQQHPTCSTTPSDNTNSLPMSTSFIQQSLYQPKVRGVAA  
IDRDGVIRFEDDEQAMLRKKKNKLRAEEIRRKDEKIEELRRRAVLDTNKVSPGQRQSYSESDVETTGT LERVMSDVS  
MVDPVNELPHFKPNTTWEGESGHCA YCKKEFNKLSVYVEDRQHHCRCNCGRVVCEDCSKNRFSVIEEGKSVQKRACDSCYDSMHE

TDLKLSRATSLSEMSSFDSFGPSSPPASSTSSSSLNMLASMSPTRPQPIPIICKSSSNSISSPRPSPGEFSRHSSTQAVK  
G

>NP\_501352.1 FYVE-type domain-containing protein [Caenorhabditis elegans]

MIGATGSGGTGGHNDVVRQGFICPFCMEDFGAYERLICHVENDHPEEDSSDLAGMFVSNVKGFFDKAKRGIQKLDAKKSI  
ADLASNVETEFTETTEKLVERAPLPRIPKPLPPDEILPGTRRSKTREFLSTRELNINEVAVRTNMLIIRLDRLINGGPKD  
KDPVKRKEFEREVVPWLDDAEAVCCPLCASRFGLTRRRHHCRLCGRVLCHSCSKFLSFDATAKTLTSSSNPLGDTHIIVEE  
PNTVENEQELLQPEENGRRSFFSLSQKSMDKMKRAMAGAVQKVHSAATGEEIIAGALNEQDLSEHMRVCNLCLRDLHFRE  
SQMDKKEPPEFVQQYDLMKVMIEEVKNLVPTYVRVVTSLKNGESVYSHKHGEELRSKCLEIQKSIDYVSKKIAEGANDKP  
NSAKEQQLRKNIRLYAVQALQGLIGQMESLPTAEECNLIIRKERRAKDFARVNRTVMKMSSSMPQLQEQHSHLNTSS  
VSSFGGPSSIDDGWSAEDNDLVFEPSSIEDDTIQTDHPLYEQREQLRKFLFQASATGKLDDEMDILERNLKEIEEEMMRLG  
LSC

>NP\_001294172.1 FYVE-type domain-containing protein [Caenorhabditis elegans]

MIGATGSGGTGGHNDVVRQGFICPFCMEDFGAYERLICHVENDHPEEDSSDLAGMFVSNVKGFFDKAKRGIQKLDAKKSI  
ADLASNVETEFTETTEKLVERAPLPRIPKPLPPDEILPGTRRSKTREFLSTRELNINEVAVRTNMLIIRLDRLINGGPKD  
KDPVKRKEFEREVVPWLDDAEAVCCPLCASRFGLTRRRHHCRLCGRVLCHSCSKFLSFDATAKTLTSSSNPLGDTHIIVEE  
PNTVENEQELLQPEENGRRSFFSLSQKSMDKMKRAMAGAVQKVHSAATGEEIIAGALNEQDLSEHMRVCNLCLRDLHFRE  
SQMDKKEPPEFVQQYDLMKVMIEEVKNLVPTYVRVVTSLKNGESVYSHKHGEELRSKCLEIQKSIDYVSKKIAEGANDKP  
NSAKEQQLRKNIRLYAVQALQGLIGQMESLPTAEECNLIIRKERRAKDFARVNRTVMKMSSSMPQLQEQHSHLNTSS  
VSSFGGPSSIDDGWSAEDNDLSRVFEPSSIEDDTIQTDHPLYEQREQLRKFLFQASATGKLDDEMDILERNLKEIEEEMMR  
LGLSC

>NP\_495983.1 WD repeat and FYVE domain-containing protein 2 [Caenorhabditis elegans]

MAAIINQRVEQGESSMGGAKPALLHRITGHVARINDVILLSKDEGVWTASDDRSVRLYLKRDNDQFWPSIHFFMPVAPTS  
LYYSEETYKLLVGLINGNVYEFSVADDFNSMTESRKWTCHAGPISGLGFALSSSELIFSCSRDKSIVWHCESENSNKMGSYL  
LENSCTAMVIDLPFVFVGHDHGGHVTVLRIVDNQPNLVSKLSAHTNAITSLTWDGNKKVLYSGSSDHLIIMWDIGGGRGEA  
YELNGHNGKVTTLCAAPAAKRLFSADHEHGKLMCWDNMCKRVETPEWKTSDCCQKCNQPFFWNLQAMWQRKVVGRLRQH  
HCRTCBSAVCGSCCDNWTTPPMGYETKIRICNDCNARMKDNPNQNFNLTPLAIPHEIHTGITAMHLQETLGLLVTSGQNRVI  
MIWDVRSVCSAPSGSQ

### **Domain Architecture of *Saccharomyces cerevisiae***

| <i>No</i> | <i>Accession Number</i> | <i>Domains</i>                                                                             |
|-----------|-------------------------|--------------------------------------------------------------------------------------------|
| 1         | NP_014403.3             | VHS domain, FYVE zinc finger<br>Ubiquitin interaction motif<br>Ubiquitin interaction motif |
| 2         | NP_010599.1             | FYVE zinc finger, Ring finger domain                                                       |
| 3         | NP_011492.3             | FYVE zinc finger                                                                           |
| 4         | NP_116674.2             | Phosphatidylinositol-4-phosphate 5-Kinase, TCP-1/cpn60 chaperonin family, FYVE zinc finger |
| 5         | NP_010610.3             | FYVE zinc finger, Rabenosyn Rab binding domain                                             |

### **Retrieved Sequences of *Saccharomyces cerevisiae***

>NP\_014403.3 ESCRT-0 subunit protein VPS27 [Saccharomyces cerevisiae S288C]  
MSVSTPSELDALIEQATSEIPNGDLPLIALEISDVLRSSRVNPKDSMRCIKKRILNTADNPNTQLSSWKLTNICVKNG  
GTPFIKEICREFMDTMEHVILREDSNEELSELVKTILYELYVAFKNSQLNYVAKVYDKLISRGIKFPEKLTLSNSPTA

MFDSKTPADWIDSDACMICKSKFSLNLRKHHCRSCGGVFCQEHSSNSIPLPDLGIYEPVRVCDSCFEDYDLKRHDDSKKS  
KKHRHKKRKKDRDYSTPEDEEELIRKAIELSLKESRNSASSEPIVPVVESKNEVKRQEIEEEEDPDLKAAIQESLREAEAA  
KLRSERQKASRQMPPQPPQPIHSVDLSDEEKDSIYMFASLVEKMKSRPLNEILED SKLQNLAQRVFASKARLNYAL  
NDKAQKYNTLIEMNGKISEIMNIYDRLLLEQQLSINLSQQYTLPQVPSDPYNYLTENVQNP AESYQTPPLQQLSSHQYKP  
QQDVSRRQQSVKANSSPTTNIHLKTIDVTPHAQQKPQSHVELAPSDPPYPKEEADEGTQAVQDEESSTQESRERPYPVE  
TENGETSINKRPQGITRYDFPTVPARKFVQPESTVPLPASSSEIPIKEERPPSPQEELLIEL

>NP\_010599.1 phosphatidylinositol-3-phosphate-binding ubiquitin-protein ligase [Saccharomyces cerevisiae S288C]

MVIKEDCINNLRWQADEEAHSCFQCKTNFSFLVRRHHCRCCGRIFCSSCTENFVNYNKKRVHALQKKNSDVESPPYRTC  
NECYDNLLHLNLLVSSTNRDVRLSQTSPPNALALSAPDSNTDEDAEILEDSDVQSGTACRSEESSQNEEDHFCPICNSD  
LTQFPDEEETRKHVEDCIQRAENAQQHTNTSDAADD SVKESPAFQNRMLVYKISPNTTDNAIKECPICFENMEPEGKVG  
LECLCVFHYKCIKNWFHKRAQMTAAQKGNGHAFVKRNFCPFHDAVF

>NP\_011492.3 Pib2p [Saccharomyces cerevisiae S288C]

MTALHSVSKTPAIKEEEEDGDERDGRGVPLGPRNHDYRGRKGDEESGADTVTSPITFEKKKIAPRASTHSEQSILSSISL  
KSMVNQHRQQQLQQESSTGAGTGFVDRKQQIQSPAMVSILRKNSAEENVRSSHSSKLGEQIDGRKASASKEIGKTLPT  
DDQRSNPELDPTNSVVDVSRGKNTKSKTVFNELEDDADDDDEVQKNLTTQALRKLSSFKMNASSNLRLSKENKAKESS  
SSTSSVSSSSTSKVENIVDKLTTTNSSSMSQLRFGNTNVIIDSVNHAAPPHQQMLRKPSLEFLPQPASSTNLNFNSNKH  
KSNVRQISNPKKPLYIPAVLRKVSETNITNDDLLNATLSSYYKKASNLEHGFNPSKSSQASVQNANNLRISSQSSVQSN  
TSSILESYKNKISSYLFPSNIPNSDRINLIPTISNRNSARVNPPTKDHWPDSKRNSCRYCHKPFTLWERKHHCRHCGDI  
FCQDHLRHPLYLDSQANFIMINELNNGGINGGGTLCCKICDDCLVEYENLSTTNHNANTNEDNINVEEGEDDDNDNRKKLR  
NYYKNRQMNALFRPKKGGSSQEHA TVDRDTTTPIQVKSNDEEADNENTGGEQEEGNDVLGSGVIGSV PANWNWSSF

>NP\_116674.2 1-phosphatidylinositol-3-phosphate 5-kinase [Saccharomyces cerevisiae S288C]

MSSEEPHASISFPDGSHVRSSSTGTSSVNTIDATLSRPNYIKKPSLHIMSTSTTSTTTDLVTNPILSNISVPKISPPTSS  
SIATATSTSHVTGTASHSNIKANANTSTSVNKKNLPTTSGRIPSSTIKRYPSRYKPSHSLQLPIKNDSNFKRSSIYASK  
STVTAIPIRNNRPISMQNSYARTPDSHDHDDVGDEVSSIKSASSSLTASLSKSFLFAFYNNRKKDKTSNNGVLSKEYWMKD  
ESSKECFSCGKTFNTFRRKHHCRICGQIFCSSCTLLIDGDRFGCHAKMRVCYNCYEHADTYEDSSDEENDSTMQLNEPRS  
RSR SRSSNTNPYSHSHSLHLISQDNHNGTDLHDPVAATDNPQQQNEVYLLNDDDDVQSIMTSGEDSKLFISTPPPPPKMA  
IPATKQGSLEISFDSENDRALHYQDDNPGRHHHLDSPTRYTIRDMDNISHYDTNSNSTLRPHYNTNNSTITINNLNNT  
TSNNSNYNNTNSNSNINNPASLSRRSIFHYVSSNSVNKDSNNSSATPASSAQSSSILDPANRIIGNYAHRNYKFKFNYS  
KGPSQQNDTANGNNDNNNNNNNNNNNNNNNSASGIADNNNIPSNDNGTFTLTKKKRNPLTKSKSTSALEYPLNEEDSS  
EDEGSMYSIYVLNDDHKTDNPIRSMRNSTKS FQRAQASLQRMFRFRKSKSKHFPNNSKSSYRDLNFLTNP NLLSVVS  
DDNLYDDSSPLQDKASSSAASRLTDRKFSNSSGSNNNSNSNSNINTDPWKRIASISGFKLKKKEKKRELNEVSLLHMHALL  
KQLLNDQEISNLQEWITLLD GALRKVLR TILNARDLNTLDFRQTYVKIKRISGGSPQNSEYIDGVVFSKALPSKTMPRHL  
KNPRILLIMFPLEYQKNNNHFLSIESVFRQEREYLDKLV SRLKSLHPDIIYVGANVSGYALELLNDSGIVVQFNMKPQVI

ERIAKLTEADIAISVDKLATNIKMGECEVKSYYGNISKTYTFLRGCNPELGGTILLRGDSLENLRKIKQVSEFMVY  
AIFSLKLESSFFNDNFIQLSTDVYLKRAESKKLQVFEGYFADFLIKFNNRILTVSPTVDFPIPFLLKARGLEKKLIERI  
NQYESESDLDRQTQLNMLQGLESTITKKHLGNLIKFLHEMEIENLELEFQKRSRQWEVSYSSSQNLLGTGSHQSITVLYS  
MVSTKTATPCVGPQIVTIDYFWDSDISIGQFIENVVGTARYPCQQGCNGLYLDHYRSYVHGSGKVDVLEKFQTRLPLKL  
DIILTWSYCKKCGTSTPILQISEKTWNHSFGKYLEVMFWSYKDSVTGIGKCPHDFTKDHVKYFGYNDLVVRLEYSDELVH  
ELITPPRKIKWKPHIDIKLKVELYYKILEKINNIFYGSVLSRLERIKLDSMTKDKVLSGQAKIHELKSNATEEQKLMLQDL  
DTFYADSPCDQHLPLNLVIKSLYDKAVNWNSTFAIFAKSYLPSETDISRITAKQLKKLFYDSSRKDSSEDKKSLHDEKAKT  
RKPEKNELPLEGLKDVEKPKIDSKNTTENNRDRTNEPQNAVTTITTFKDDTPIIPTSGTSHLTVTPSASSVSSSLTPQTEER  
PPISRSRGISMTHDKSTRPNIRKMSSDSSLCGLASLANEYSKNNKVSKLATFFDQMHFDALSKEFELERERERLQLNKD  
KYQAIRLQTSTPIVEIYKNVKDAVDEPLHSRSSGNLSSANVKLEAPVGEHSRANNCNPPNLDQNLETELENSISQWGE  
NILNPSGKTTASTHLNSKPVVKETSENPKSIVRESDNSKSEPLPPVITTTTVNKVESTPQPEKSLLMKTLSNFWADRSA  
LWKPLVYPTCPSEHIFTDSVDVIREDPSSLIAFCLSTSDYRNKMMNLNVQQQQQQQTAEAAPAKTGGNSGGTTQTGDP  
VNISPSVSTTSHNKGRDSEISSLVTTKEGLLNTPIEGARDRTQPESQTHSQANLDTLQELEKIMTKKTATHLRYQFEEG  
LTVMSCKIFFTEHFDVFRKICDCQENFIQSLSRCVKWDSNGGKSGSGFLKTLDDRFIKELSHAELEAFIKFAPSIFYEYM  
AQAMFHDLPTTLAKVFGFYQIQVKSSISSSKSYKMDVIIMENLFYEKKTTRIFDLKGSMRNRHVEQTGKANEVLLDENMV  
EYIYESPIHVREYDKLLRASVWNDTLFLAKMNVMDYSLVIGIDNEGYTLTVGIIDFIRTFWTDKKLESWVKEKGLVGA  
SVIKQPTVVTPRQYKKRFREAMERYILMVPDPWYREGN

>NP\_010610.3 Pep7p [*Saccharomyces cerevisiae* S288C]

MDLENVSCPICLRKFDNLQALNAHLDVEHGFNDNEDSLGSNDSRLVNGKQKKARSVDSSAQKLKRSHWEKFKKGKSCCHT  
CGRTLNNNIGAINCRKCGKLYCRRHLPNMIKLNLSAQYDPRNGKWYNCHDCFVTKPGYNDYGEVIDLTPEFFKVRNIKR  
EDKNLRLQLLENRFVRLVDGLITLYNTYSRSIIHNLKMNSEMSKLERTVTPWRDDRSVLCNICSEPFGLLLRKHHCLC  
GMVVCDDANRNCSEISIGYLMASADLPFEYNIQKDDLHPIISIRLCSHCIDMLFIGRKFNKDVRMPLSGIFAKYDSM  
QNISKVIDSLLPIFEDSLNSLVETAKDSENTLDPKNLNDLARLRHKLLNSFNLYNTLTRQLLSVEPQSHLERQLQNSIK  
IASAAYINEKILPLKSLPAILNPEGHKTNEDGQKAEPEVKKLSQLMIENLTIKEVKELREELMVLKEQSYLIESTIQDYK  
KQRRLEEIVTLNKNLEELHSRIHTVQSKLGDHGFN
