# Supplementary material for: The PH Domain and C-Terminal polyD Motif of Phafin2 Exhibit a Unique Concurrence in Animals
Source: MDPI journal article supplement (doi:10.3390/membranes12070696), 2022-07-07
Supplement: s1 [file s1]

# The PH Domain and C-Terminal polyD Motif of Phafin2 Exhibit a Unique Concurrence in Animals

Mahmudul Hasan <sup>1,2,\*</sup> and Daniel G. S. Capelluto <sup>1,\*</sup>

<sup>1</sup> Protein Signaling Domains Laboratory, Department of Biological Sciences, Fralin Life Sciences Institute and Center for Soft Matter and Biological Physics, Virginia Tech, Blacksburg, VA 24061, USA

<sup>2</sup> Department of Pharmaceuticals and Industrial Biotechnology, Sylhet Agricultural University, Sylhet 3100, Bangladesh

\* Correspondence: mahmudulh20@vt.edu (M.H.); capelluto@vt.edu (D.G.S.C.)

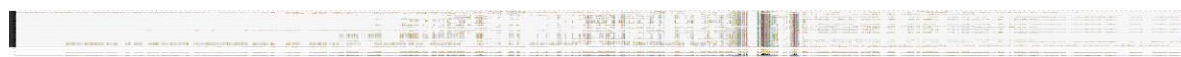

**Supplementary Figure S1.** JalView illustration of aligned retrieved bacterial protein sequences constructed by Clustal Omega.

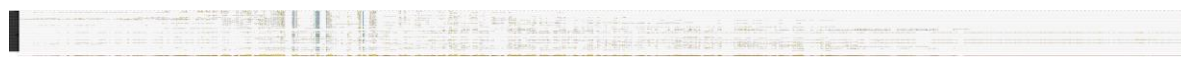

**Supplementary Figure S2.** JalView illustration of aligned retrieved archaeal protein sequences constructed by Clustal Omega.

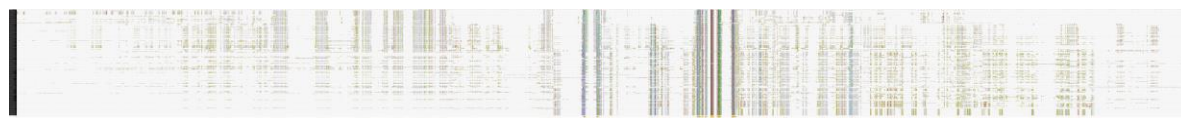

**Supplementary Figure S3.** JalView illustration of aligned retrieved fungal protein sequences constructed by Clustal Omega.

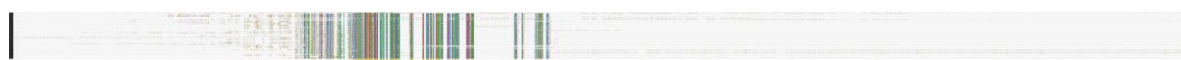

**Supplementary Figure S4.** JalView illustration of aligned retrieved plant's protein sequences constructed by Clustal Omega.

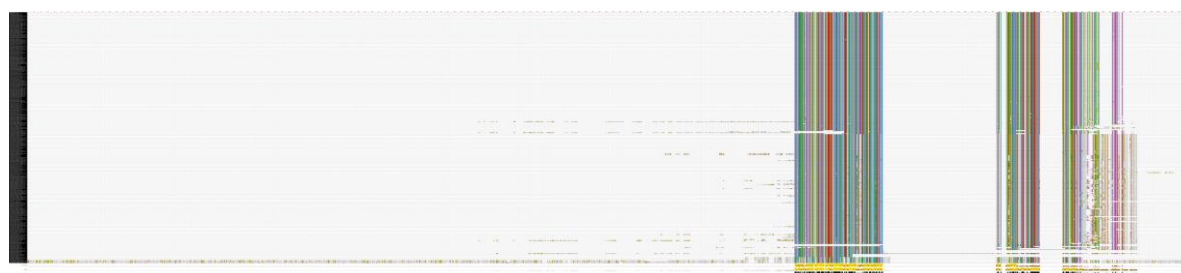

**Supplementary Figure S5.** JalView illustration of aligned retrieved non-human mammalian protein sequences constructed by Clustal Omega.

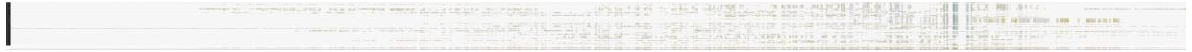

**Supplementary Figure S6.** JalView illustration of aligned retrieved human's protein sequences constructed by Clustal Omega.

**Supplementary Table S1.** Different modules found in bacterial and archaea PH- and FYVE domain containing proteins.

| <i>Life forms</i> | <i>UniProt ID</i>     | <i>Gene</i>       | <i>Organism</i>                          | <i>Protein</i>                          | <i>Modules</i>                                   |
|-------------------|-----------------------|-------------------|------------------------------------------|-----------------------------------------|--------------------------------------------------|
| <b>Bacteria</b>   | A0A1Y6CWR2_9GAM<br>MM | SAMN02949497_2038 | <i>Methylomagnum<br/>ishizawai</i>       | FYVE zinc finger                        | FYVE                                             |
|                   | A0A2E9XWQ4_9RIC<br>K  | CMP47_14530       | <i>Rickettsiales bacterium</i>           | Uncharacterized<br>protein              | VHS;<br>FYVE                                     |
|                   | A0A2E4CAT1_9ACT<br>N  | CL450_07530       | <i>Acidimicrobiaceae<br/>bacterium</i>   | Uncharacterized<br>protein              | FYVE;<br>Phosphatidylinositol 3-<br>and 4-kinase |
|                   | A0A0Q9PCH9_9GAM<br>M  | ASG87_06725       | <i>Frateruria sp. Soil773</i>            | FYVE-type domain-<br>containing protein | FYVE                                             |
|                   | A0A2E8CGN4_9DEL<br>T  | CL926_13625       | <i>Deltaproteobacteria<br/>bacterium</i> | Uncharacterized<br>protein              | UBA-like; FYVE                                   |
| <b>Archaea</b>    | A0A482RXE8_9ARC<br>H  | EON64_13770       | <i>Archaeon</i>                          | Uncharacterized<br>protein              | RhoGEF;<br>FYVE; PH                              |
|                   | A0A482S4E7_9ARCH      | EON65_55335       | <i>Archaeon</i>                          | FYVE-type domain-<br>containing protein | FYVE;<br>FERM                                    |
|                   | A0A482SL25_9ARCH      | EON65_20320       | <i>Archaeon</i>                          | Uncharacterized<br>protein              | FYVE; WW                                         |
|                   | A0A482SVF7_9ARCH      | EON65_02420       | <i>Archaeon</i>                          | FYVE-type domain-<br>containing protein | FYVE                                             |
|                   | A0A482SZF2_9ARCH      | EON65_10680       | <i>Archaeon</i>                          | FYVE-type domain-<br>containing protein | Lipase (class 3); FYVE                           |
|                   | A0A482RGE2_9ARC<br>H  | EON67_05280       | <i>Archaeon</i>                          | FYVE-type domain-<br>containing protein | IPT/TIG;<br>FYVE                                 |
|                   | A0A482RTU5_9ARC<br>H  | EON64_18385       | <i>Archaeon</i>                          | FYVE-type domain-<br>containing protein | FYVE; Ankyrin repeat                             |
|                   | A0A482SVG8_9ARC<br>H  | EON65_11985       | <i>Archaeon</i>                          | FYVE-type domain-<br>containing protein | FYVE; Tropomyosin                                |

**Supplementary Table S2.** Summary of orthologues of human Phafin2.

| <i>Species set</i>                               | <i>With 1:1<br/>orthologues</i> | <i>With 1:many<br/>orthologues</i> | <i>With many:many<br/>orthologues</i> | <i>Without<br/>orthologues</i> |
|--------------------------------------------------|---------------------------------|------------------------------------|---------------------------------------|--------------------------------|
| Primates (26 <i>species</i> )                    | 22                              | 1                                  | 0                                     | 3                              |
| Humans and other primates                        |                                 |                                    |                                       |                                |
| Rodents and related species (32 <i>species</i> ) | 18                              | 3                                  | 0                                     | 11                             |
| Rodents, lagomorphs and tree shrews              |                                 |                                    |                                       |                                |
| <i>Laurasiatheria</i> (43 <i>species</i> )       | 31                              | 1                                  | 0                                     | 11                             |
| Carnivores, ungulates, and insectivores          |                                 |                                    |                                       |                                |
| Placental mammals (106 <i>species</i> )          | 75                              | 5                                  | 0                                     | 26                             |
| <i>Sauropsida</i> (69 <i>species</i> )           | 24                              | 0                                  | 0                                     | 45                             |
| Birds and reptiles                               |                                 |                                    |                                       |                                |
| Fish (86 <i>species</i> )                        | 55                              | 8                                  | 0                                     | 23                             |
| Ray-finned fishes                                |                                 |                                    |                                       |                                |
| All (278 <i>species</i> )                        | 169                             | 13                                 | 0                                     | 96                             |
| All species, including invertebrates             |                                 |                                    |                                       |                                |
